# Supplementary material for: Multi-omics-guided discovery: yeast protein alleviates glucocorticoid-induced muscle atrophy through dual activation of IGF-1/PI3K/Akt/FOXO and CaMKK/AMPK signaling pathways
Source: Royal Society of Chemistry journal article supplement (doi:10.1039/d5fo04912a), 2026-01-01
Supplement: d5fo04912a1.pdf [file d5fo04912a1.pdf]

## Supplementary Materials for

### **Multi-omics-guided discovery: Yeast Protein alleviates glucocorticoid-induced muscle atrophy through dual activation of IGF-1/PI3K/Akt/FOXO and CaMKK/AMPK signaling pathways**

*Yu Liang<sup>a</sup>, Qiaocui Liu<sup>a</sup>, Xing Zhang<sup>c</sup>, Bin Li<sup>a</sup> and Tao Hou<sup>a, b, \*</sup>*

a College of Food Science and Technology, Huazhong Agricultural University, Wuhan 430070, China

b Hubei Provincial Key Laboratory of Yeast Function, Yichang, 443003, China

c Institute of Drug Discovery and technology, Ningbo University, Ningbo 315211, China

\* Address correspondence to this author at College of Food Science and Technology, Huazhong Agricultural University, Wuhan, 430070, People's Republic of China;

Email: houtao@mail.hzau.edu.cn

Tel: 011-86-27-87280346

Funding: This study is supported by Hubei Province Natural Science Foundation joint fund project (2024AFD124) and Special Fund for Basic Scientific Research Business Expenses of Central Universities (2662025SPPY004).

#### **This PDF file includes:**

Supplementary Text

Figs. S1 to S6

Tables S1 to S4 (Tables S2 to S4 are provided in spreadsheet format via hyperlinks:

[Supplementary Table 2.xlsx](#); [Supplementary Table 3.xlsx](#); [Supplementary Table 4.xlsx](#))

# Supplemental Figures

Fig. S1.

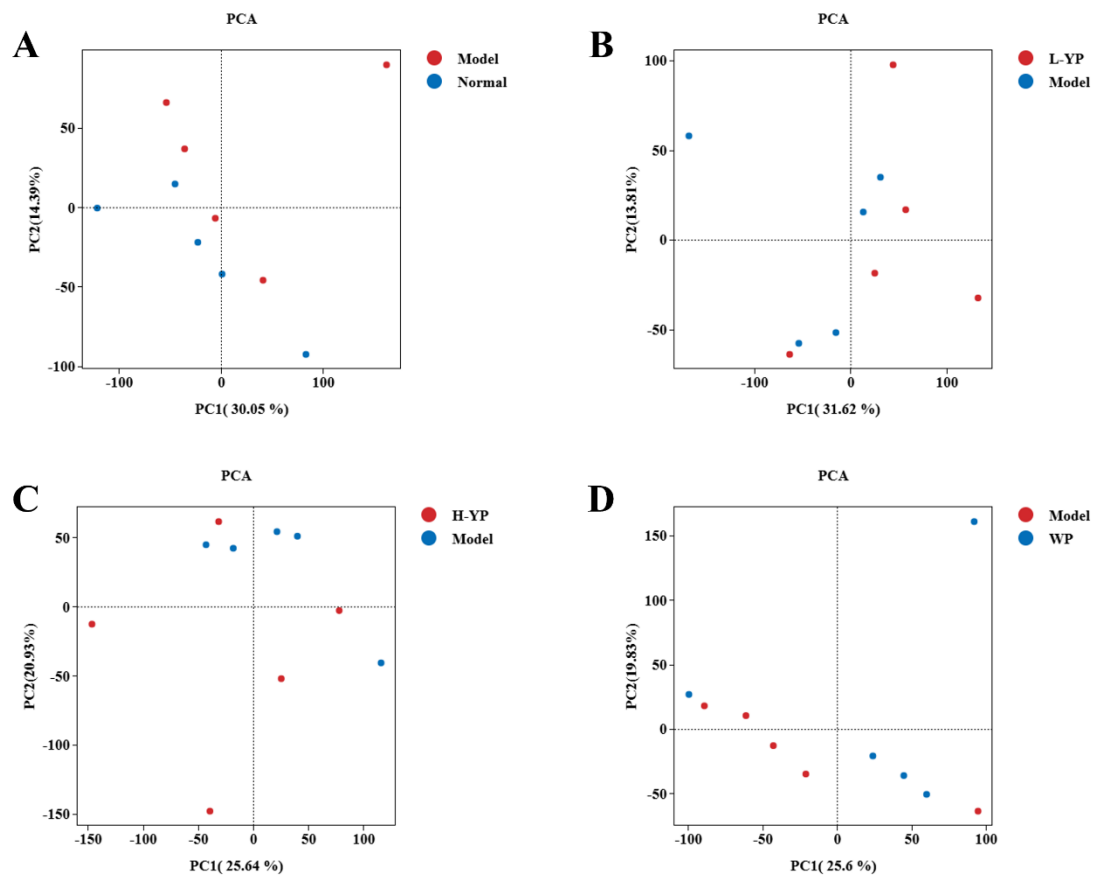

**Figure S1. PCA map of the quadriceps transcriptome.** (A) Normal vs. Model. (B) Model vs. L-YP. (C) Model vs. H-YP. (D) Model vs. WP.

Fig. S2.

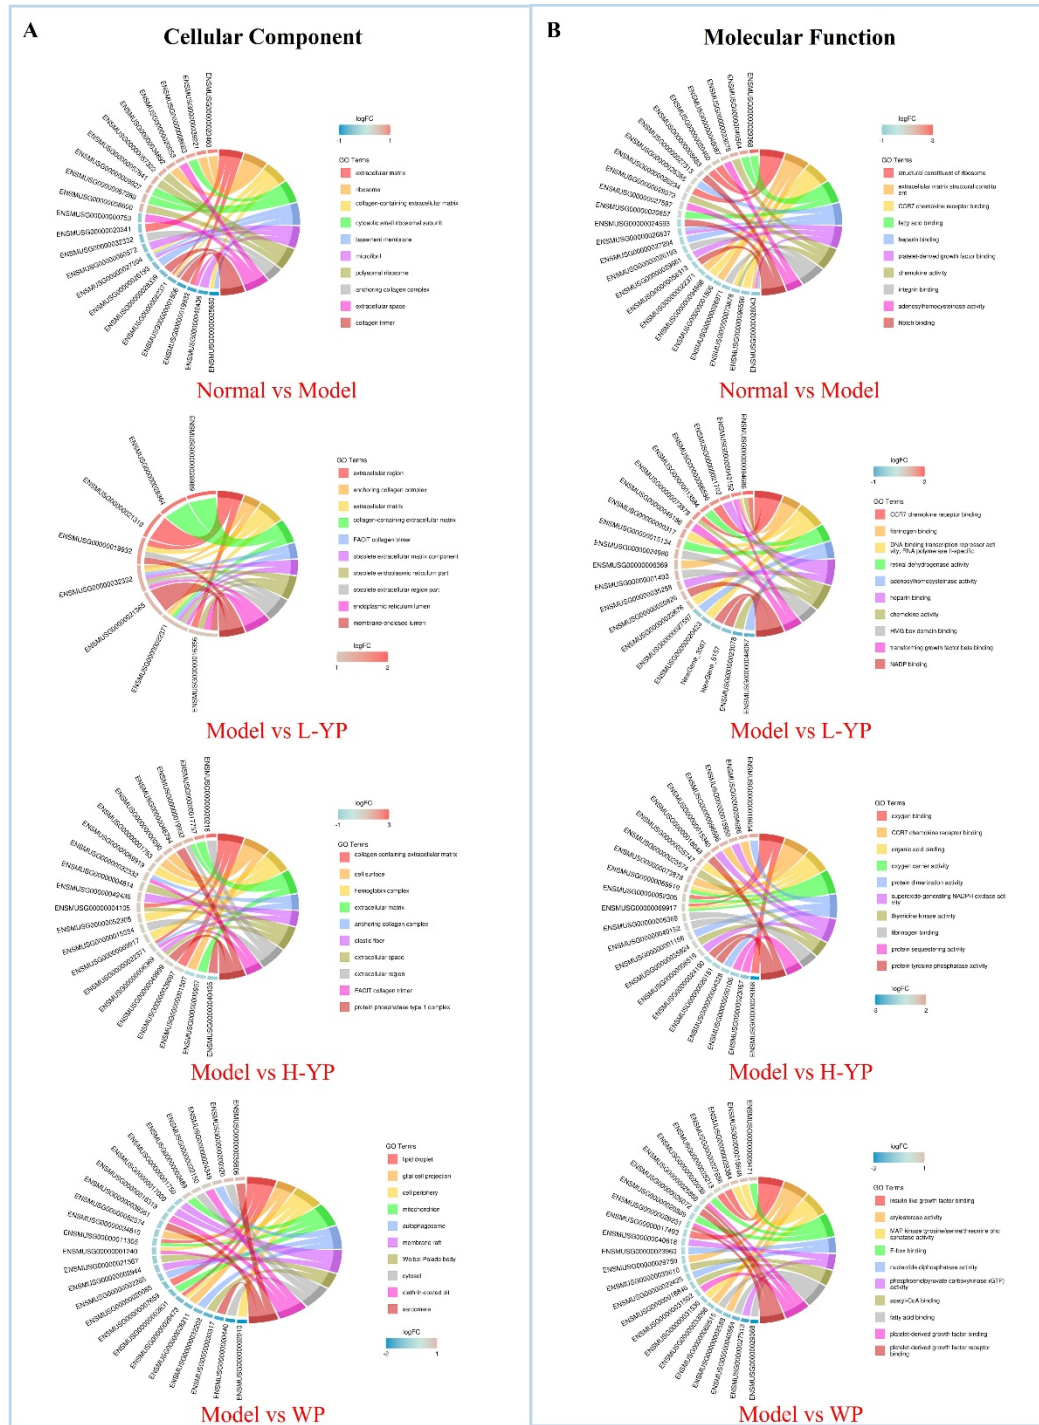

Figure S2. String plot of GO enrichment analysis of the muscle transcriptome. (A) Cellular Component; (B) Molecular Function.

**Fig. S3.**

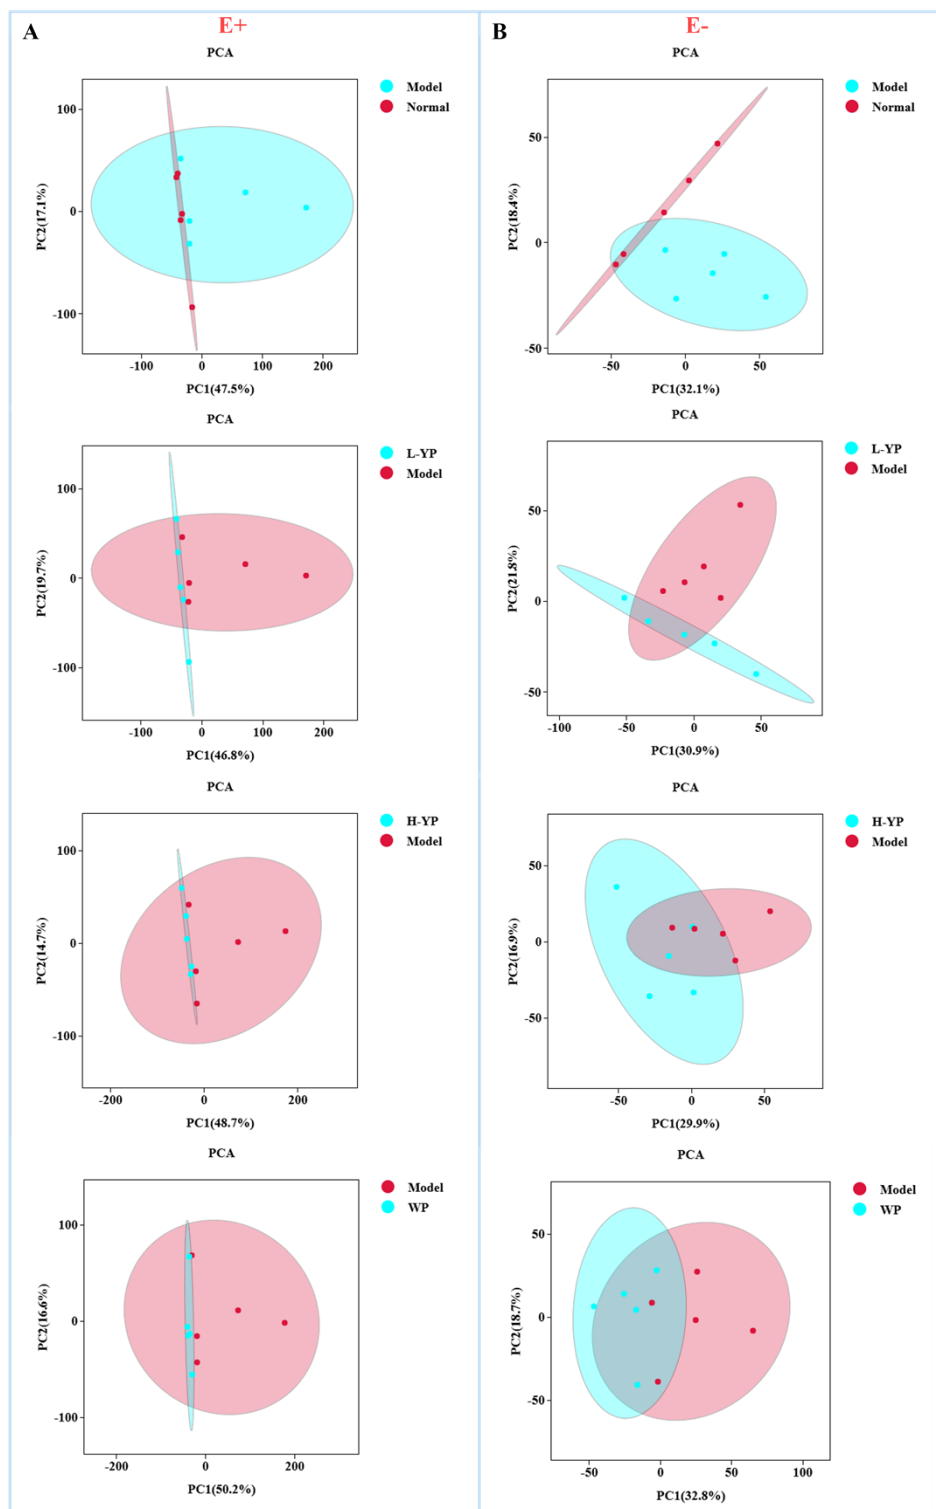

**Figure S3. PCA plot of the serum metabolome. (A) Positive ion mode (E+); (B) Negative ion mode (E-)**

**Fig. S4.**

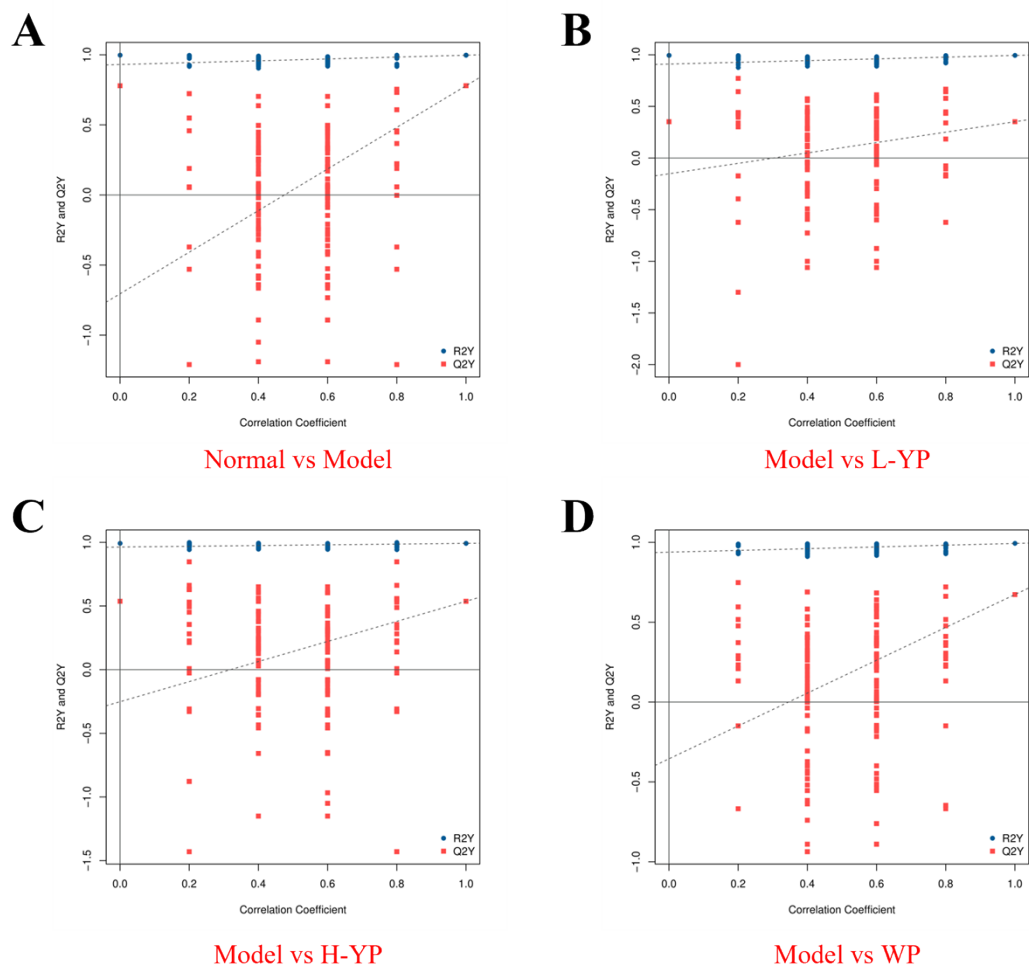

**Figure S4 Permutation test diagram of the OPLS-DA model. (A) Normal VS Model (B) Model VS L-YP; (C) Model VS H-YP (D) Model VS WP.**

Note: The blue dots and red dots respectively represent the R2Y and Q2Y of the permutation model, and the two dotted lines are the regression lines of the fitting of R2Y and Q2Y. If the slope of the Q2Y fitted regression line is regular, it indicates that the model is meaningful. If the blue dots are generally above the red dots, it suggests that the independence of the modeling training set and the test set is good.

**Fig. S5.**

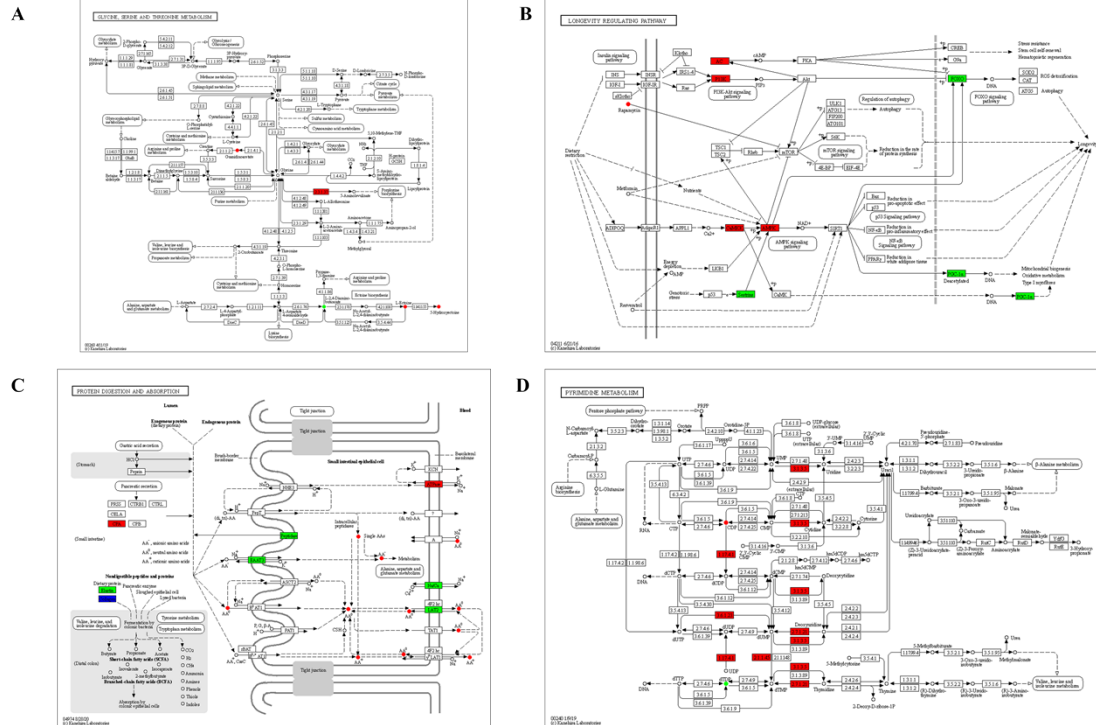

**Figure S5 Effects of H-YP on Glycine, serine and threonine metabolism (A) Protein digestion and absorption (C), Longevity Regulating Pathway (B), Pyrimidine metabolism (D) pathway.**

Note: The boxes in the figure represent gene products, and the circles represent metabolites; The gene products/metabolites in the red/green background boxes belong to the differential genes/metabolites detected this time. Among them, red indicates up-regulated genes/metabolites and green indicates down-regulated genes/metabolites. All the gene products with blue background boxes belong to both up-regulated and down-regulated genes/metabolites.

**Fig. S6.**

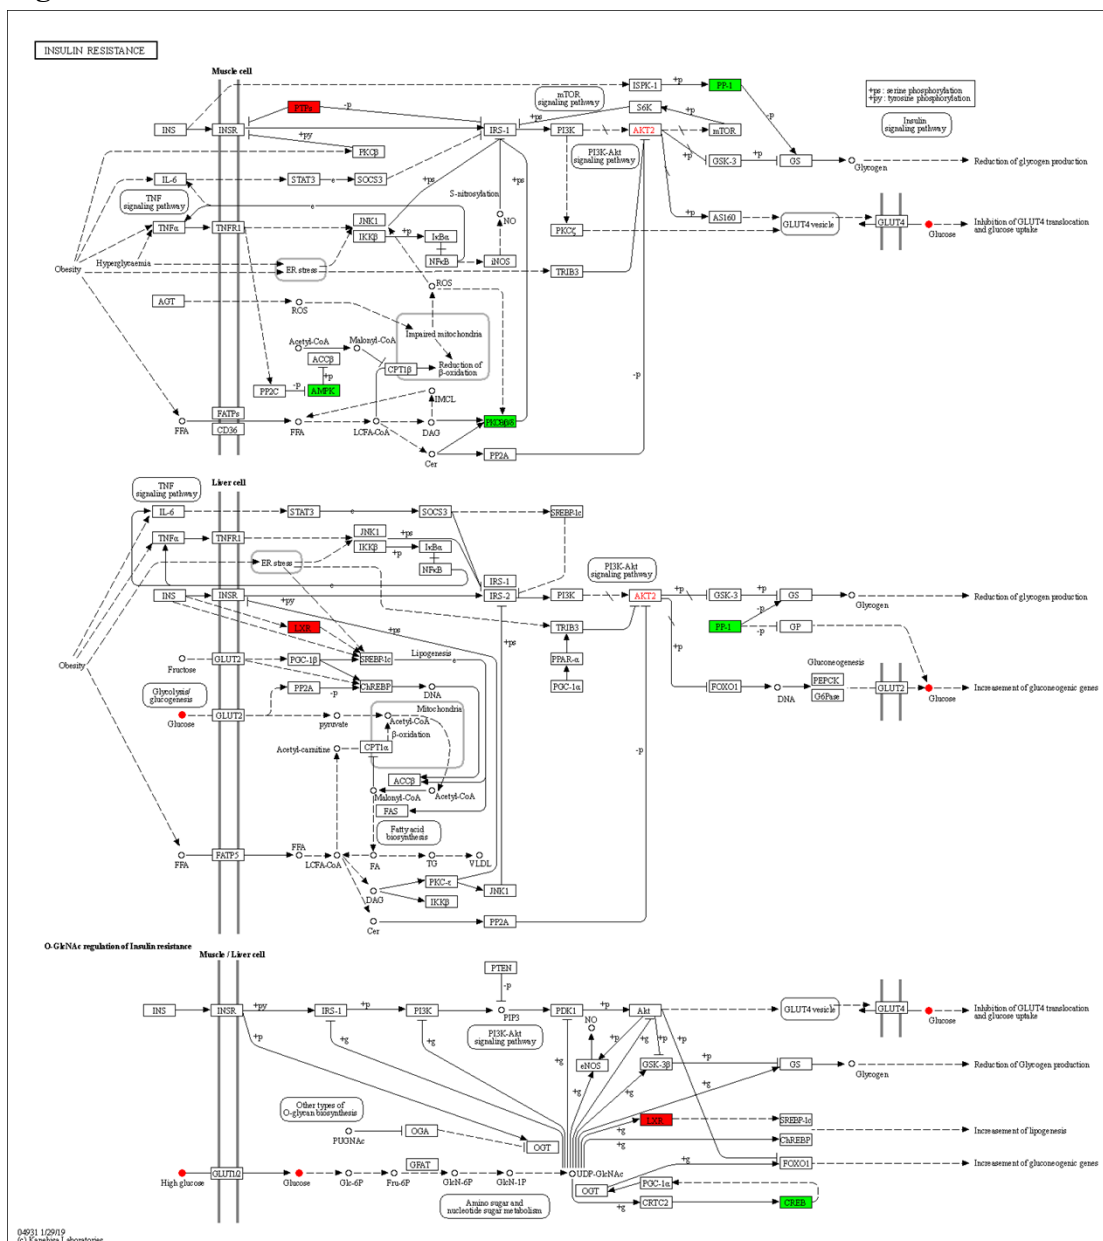

**Figure S6 KEGG analysis diagram of the insulin resistance pathway in the normal group vs the model group.**

**Table S1.**

Table S1 Quality control of RNA sequencing in quadriceps femoris specimens.

| Group  | Samples | Clean reads | Clean bases | Q30 (%) | GC content (%) |
|--------|---------|-------------|-------------|---------|----------------|
| Normal | A1      | 21296930    | 6363200734  | 97.97   | 47.75          |
|        | A2      | 20838015    | 6215594008  | 98.42   | 47.54          |
|        | A3      | 21961644    | 6534743520  | 98.47   | 47.07          |
|        | A4      | 21517435    | 6421870636  | 98.22   | 47.78          |
|        | A5      | 20374490    | 6070328977  | 98.26   | 47.29          |
| Model  | B1      | 19848230    | 5917079140  | 97.9    | 47.98          |
|        | B2      | 20396711    | 6072124491  | 98.43   | 47.72          |
|        | B3      | 22819049    | 6778679154  | 97.57   | 47.3           |
|        | B4      | 21368048    | 6365695163  | 97.99   | 47.42          |
|        | B5      | 21304287    | 6359696152  | 98.33   | 48.75          |
| L-YP   | C1      | 20509743    | 6114220709  | 98.29   | 47.02          |
|        | C2      | 20934744    | 6231660056  | 97.91   | 47.81          |
|        | C3      | 21206714    | 6323709313  | 97.76   | 48.02          |
|        | C4      | 21807904    | 6493378916  | 98.21   | 47.84          |
|        | C5      | 19477018    | 5807048736  | 97.47   | 47.97          |
| H-YP   | D1      | 20788639    | 6196667355  | 98.28   | 47.22          |
|        | D2      | 20622559    | 6147914834  | 98.3    | 47.88          |
|        | D3      | 20473430    | 6115016491  | 98.24   | 47.14          |
|        | D4      | 21515301    | 6420057923  | 98.24   | 47.64          |
|        | D5      | 20211362    | 6021981906  | 98.18   | 48.52          |
| WP     | E1      | 21079026    | 6294574673  | 98.46   | 47.04          |
|        | E2      | 20495979    | 6109447699  | 98.49   | 48.41          |
|        | E3      | 19277481    | 5751686443  | 98.4    | 47.98          |
|        | E4      | 20996794    | 6274927150  | 98.34   | 47.42          |
|        | E5      | 21510017    | 6425351916  | 98.12   | 46.24          |

Note: Clean reads refer to the total number of pair-end Reads in Clean Data; "Clean bases" refers to the total number of bases in "Clean Data". GC content is the percentage of G and C among the



total bases in Clean Data; Q30% is the percentage of bases with a Clean Data quality value greater than or equal to 30.
