# Supplementary material for: Multi-omics-guided discovery: yeast protein alleviates glucocorticoid-induced muscle atrophy through dual activation of IGF-1/PI3K/Akt/FOXO and CaMKK/AMPK signaling pathways
Source: Royal Society of Chemistry journal article supplement (doi:10.1039/d5fo04912a), 2026-01-01
Supplement: d5fo04912a2.xlsx [file d5fo04912a2.xlsx]

## Sheet: Normal_vs_Model.DEG  DESeq2
Supplementary Table 2: Normal_vs_Model.DEG DESeq2
#ID	Symbol	A5_Count	A4_Count	A3_Count	A2_Count	A1_Count	B4_Count	B3_Count	B2_Count	B1_Count	B5_Count	A5_FPKM	A4_FPKM	A3_FPKM	A2_FPKM	A1_FPKM	B4_FPKM	B3_FPKM	B2_FPKM	B1_FPKM	B5_FPKM	Pvalue	log2FC	regulated
ENSMUSG00000028234	Rps20	6857	7858	6631	6758	5234	7661	7091	7670	7974	18586	49.1885	53.9988	44.0955	47.3117	35.6754	52.299	45.4389	55.1504	58.717	129.124	0.0373181	0.68673	up
ENSMUSG00000035279	Ssc5d	337	321	103	262	578	211	208	235	127	73	2.05891	1.87653	0.581926	1.55774	3.3534	1.22341	1.1329	1.43987	0.794662	0.427873	0.0204699	-0.820188	down
ENSMUSG00000053916	Nanp	198	159	110	121	104	82	87	95	83	79	3.76125	2.8968	1.93065	2.24464	1.87892	1.48553	1.47406	1.81214	1.6237	1.45678	0.00840322	-0.644864	down
NewGene_3275	NewGene_3275	215	355	375	493	220	87	85	116	59	69	3.96088	7.27445	7.47379	9.47277	3.43428	1.33048	1.16427	1.75933	0.929396	0.972881	2.27365e-11	-1.94653	down
ENSMUSG00000027408	Cpxm1	135	253	83	147	210	117	83	72	87	43	1.51378	2.71402	0.85801	1.60943	2.23231	1.24833	0.827367	0.810153	1.00333	0.467515	0.00027691	-0.975183	down
ENSMUSG00000058600	Rpl30	3266	4772	4488	3777	2891	4192	3737	4687	6184	8859	103.224	152.529	156.092	116.703	96.7449	125.76	111.776	162.214	209.039	279.885	0.0370672	0.632204	up
ENSMUSG00000029368	Alb	22	84	18	12	47	188	4	2440	102	1802	0.285126	1.04035	0.207125	0.143729	0.581142	2.33124	0.046704	31.9654	1.35736	22.8077	5.3544e-05	4.86522	up
ENSMUSG00000067780	Pi15	89	63	61	68	186	46	89	32	38	20	0.340512	0.231002	0.216217	0.253568	0.67523	0.1661	0.303606	0.123156	0.147282	0.071161	0.0140937	-0.972857	down
ENSMUSG00000053279	Aldh1a1	4497	4202	4271	5135	6914	6747	8511	6944	6020	7583	52.953	47.5054	46.9367	58.2524	78.6097	76.4957	90.7608	82.0608	72.3192	86.8553	0.000180536	0.614639	up
ENSMUSG00000019932	Kera	119	365	45	41	241	58	45	59	68	99	1.37816	4.0679	0.47895	0.464934	2.66835	0.635888	0.463592	0.684086	0.810067	1.10898	0.0314974	-1.12214	down
ENSMUSG00000019933	Mrln	1924	2054	1678	1331	1809	1852	1933	2614	2570	4372	116.371	119.051	94.7661	78.7999	104.254	106.822	105.266	158.868	160.304	256.647	0.0127554	0.725897	up
ENSMUSG00000036745	Ttll7	8100	9313	7730	6373	11502	11265	15310	13174	10976	11687	42.8344	48.4016	42.977	30.8722	60.1652	60.614	84.3167	75.1527	66.032	86.901	0.000102747	0.624289	up
ENSMUSG00000075289	Carns1	536	823	562	539	729	325	345	371	302	247	5.39158	7.40279	5.48569	5.34309	6.22425	2.97638	2.15935	3.88093	3.18049	1.65677	1.54696e-11	-0.933931	down
NewGene_9516	NewGene_9516	81	91	70	66	92	105	144	113	101	154	2.09712	2.32544	1.65433	1.63045	2.31911	2.66642	3.27457	2.99715	2.71366	4.11189	0.00217633	0.724311	up
ENSMUSG00000064307	Lrrc51	70	95	111	117	101	143	103	112	121	260	2.06625	2.76082	3.09148	3.49365	2.84299	4.1683	2.78126	3.42061	3.83364	7.73686	0.0378028	0.703596	up
ENSMUSG00000078139	AK157302	42	36	34	43	250	317	353	23	200	105	0.573882	0.464092	0.434517	0.577125	3.2742	4.16415	4.34678	0.305511	2.83196	1.39728	0.022737	1.42989	up
ENSMUSG00000001506	Col1a1	2203	2228	1038	1776	5451	1943	1197	997	899	588	9.8746	9.56672	4.31375	7.76799	23.2166	8.28767	4.79336	4.47865	4.13694	2.55107	0.00106638	-1.08537	down
ENSMUSG00000031708	Tecr	9292	10190	9855	8525	9950	11687	13102	14703	12922	18126	202.889	210.07	201.534	180.631	212.05	241.041	257.328	309.126	283.406	371.084	0.000979527	0.656624	up
ENSMUSG00000049551	Fzd9	348	420	414	490	424	302	243	309	302	167	4.03019	4.66424	4.4434	5.53437	4.66719	3.33127	2.51369	3.58451	3.5873	1.86447	4.42135e-05	-0.619292	down
ENSMUSG00000040428	Plekha4	192	189	196	182	191	138	111	117	179	22	2.07887	1.89146	1.90687	1.80786	1.9845	1.48516	1.01052	1.16524	1.93875	0.210954	0.0328934	-0.745249	down
ENSMUSG00000008540	Mgst1	1678	2804	1674	2666	3161	9430	1719	1255	3804	8595	40.0077	61.7265	35.4358	59.2598	68.6611	222.834	35.4206	28.6468	90.7461	202.553	0.0393921	1.18088	up
ENSMUSG00000024593	Megf10	79	102	50	82	129	57	75	70	41	28	0.27712	0.344343	0.161271	0.281624	0.430832	0.188774	0.234772	0.246612	0.14812	0.09332	0.0244952	-0.627988	down
ENSMUSG00000040488	Ltbp4	3959	3390	3214	4265	5234	3062	3343	2925	2783	870	20.5729	16.8737	15.4711	21.6141	25.8364	15.1551	15.5289	15.234	14.846	4.29445	0.0158099	-0.594495	down
ENSMUSG00000016194	Hsd11b1	805	1161	515	870	1438	3407	783	688	1520	3473	13.425	19.2255	8.01522	13.9335	23.8582	55.952	11.4927	11.3265	25.6505	55.12	0.0225497	1.19389	up
ENSMUSG00000014609	Chrne	483	515	342	302	490	272	290	231	316	113	8.02115	8.19568	5.26533	4.89773	7.70003	4.29472	4.30068	3.86718	5.37364	1.82206	0.00061336	-0.764389	down
ENSMUSG00000030022	Adamts9	641	865	872	418	534	617	344	494	452	161	2.12332	2.7453	2.67907	1.35159	1.68149	1.94663	1.01855	1.63959	1.5366	0.514495	0.0214757	-0.696224	down
ENSMUSG00000037095	Lrg1	1088	869	1142	889	1031	1806	1321	1546	1682	1650	20.5345	15.7128	19.9814	16.3824	18.4911	32.4374	22.2667	29.2484	32.5932	30.1629	2.26215e-05	0.730373	up
ENSMUSG00000022436	Sh3bp1	44	64	38	63	65	60	32	17	16	28	0.505875	0.68487	0.398067	0.685237	0.697209	0.703819	0.314634	0.183428	0.175597	0.304446	0.0290503	-0.775404	down
ENSMUSG00000006586	Runx1t1	39	44	27	44	58	58	61	110	78	80	0.175744	0.182334	0.105736	0.186136	0.251721	0.239673	0.236866	0.480044	0.346776	0.337023	0.000401356	0.972821	up
ENSMUSG00000003032	Klf4	1081	944	1050	1760	1714	839	746	837	798	602	9.50297	7.93749	8.53924	15.0864	14.2848	7.00498	5.84774	7.35865	7.20138	5.11782	2.73308e-05	-0.704458	down
NewGene_1267	NewGene_1267	273	280	274	221	221	288	349	230	355	813	12.3145	12.228	11.5622	9.74024	9.5552	12.5163	14.1812	10.422	16.4654	36.0512	0.0279564	0.816825	up
ENSMUSG00000079484	Phyhd1	499	484	586	438	512	1154	1085	1010	909	1211	9.6013	8.65391	10.5944	8.27248	8.84517	21.0106	18.6112	18.82	16.5694	22.3295	2.50863e-10	1.1606	up
ENSMUSG00000050777	Tmem37	928	646	1188	734	885	1320	1862	997	877	1689	18.8158	12.5347	22.3185	14.5234	17.0343	25.4757	33.7246	20.2482	18.2474	33.1553	0.01682	0.689495	up
ENSMUSG00000054641	Mmrn1	61	226	110	113	187	82	137	55	90	50	0.356458	1.27999	0.596539	0.650518	1.04943	0.458843	0.724853	0.321836	0.543243	0.286257	0.0490961	-0.66965	down
ENSMUSG00000021950	Anxa8	198	153	38	68	149	177	176	135	174	330	2.7926	2.0687	0.495291	0.932829	2.00027	2.38124	2.21413	1.9011	2.51422	4.5141	0.0425678	0.855936	up
ENSMUSG00000071078	Nr2c2ap	56	98	52	74	60	139	83	84	96	128	1.32491	2.1759	1.1159	1.69927	1.37025	3.10849	1.73603	1.99858	2.29057	2.92087	0.00538816	0.726954	up
ENSMUSG00000023087	Noct	1295	1474	1419	1336	1462	933	627	961	1064	809	9.04891	10.182	9.42319	7.61012	9.3255	5.42372	4.07672	7.81718	8.98156	6.44391	7.51796e-05	-0.606538	down
NewGene_9063	NewGene_9063	52	41	29	32	28	100	86	133	74	118	0.669087	0.387388	0.329841	0.473267	0.279144	1.00964	1.10273	1.49152	0.837297	1.28827	2.41471e-07	1.5655	up
ENSMUSG00000078922	Tgtp1	227	636	588	474	529	174	149	230	261	100	2.13208	5.78056	5.12926	4.35291	4.72819	1.5508	1.2984	2.22394	2.51559	0.905132	1.25566e-06	-1.37966	down
ENSMUSG00000078921	Tgtp2	249	690	602	602	567	230	138	199	229	167	2.35384	6.24611	5.28	5.5575	5.09152	2.06248	1.16629	1.87818	2.22054	1.52889	9.9224e-09	-1.42822	down
ENSMUSG00000060002	Chpt1	5441	7370	4291	6720	8163	14633	4894	4386	7482	17403	48.465	60.469	43.012	71.0938	60.4532	145.198	42.5375	39.6648	73.9715	195.448	0.0420999	0.751843	up
ENSMUSG00000075705	Msrb1	3144	3685	3974	3298	2919	4930	5733	5225	4123	7746	87.1698	98.6768	103.803	90.4131	77.1683	131.441	145.344	148.126	120.512	213.682	0.00111594	0.796039	up
ENSMUSG00000026822	Lcn2	48	48	69	54	60	836	1319	1134	1197	2031	1.37649	1.32481	1.85356	1.49089	1.62047	23.0962	34.2212	33.014	35.6686	57.1235	1.55648e-53	4.66031	up
ENSMUSG00000028463	Car9	22	44	57	28	32	50	56	91	77	38	0.28177	0.551915	0.692044	0.356016	0.390422	0.623949	0.650525	1.18639	1.03332	0.473641	0.022745	0.802421	up
ENSMUSG00000044250	Pced1b	58	71	43	67	88	53	48	47	44	15	0.724487	0.902729	0.521793	0.952311	1.08955	0.680555	0.514834	0.604564	0.544511	0.168198	0.0251466	-0.60546	down
NewGene_1148	NewGene_1148	31	58	36	40	13	78	566	443	623	73	0.926237	1.66453	0.995251	1.15022	0.370621	2.22449	15.1624	13.3276	19.1941	2.10789	2.94477e-09	3.33833	up
NewGene_1147	NewGene_1147	83	107	102	102	75	185	128	179	199	137	2.31692	2.86402	2.63924	2.7833	1.97041	4.90858	3.18167	5.02049	5.70148	3.70309	1.36908e-05	0.867711	up
ENSMUSG00000045868	Gvin1	472	723	849	710	1327	626	472	286	351	143	1.39192	2.09017	2.32286	2.04421	3.72168	1.75677	1.24305	0.845652	1.0626	0.406579	0.000311645	-1.08506	down
ENSMUSG00000038351	Sgsm2	137	87	56	132	134	86	45	67	80	33	0.744518	0.451437	0.283134	0.695409	0.692148	0.441508	0.217135	0.371511	0.445703	0.174296	0.00877348	-0.763992	down
ENSMUSG00000033096	Apmap	1388	1626	1225	1701	2336	4447	1593	1252	2172	3949	16.5025	18.5276	13.5085	19.7443	26.3946	50.3439	16.9172	14.9212	26.5146	45.4889	0.0130039	0.812119	up
ENSMUSG00000073125	Xlr3b	87	46	47	92	36	53	29	35	25	23	1.47308	0.739401	0.730834	1.52313	0.574102	0.855371	0.431501	0.582919	0.4209	0.36279	0.0162819	-0.881565	down
ENSMUSG00000062006	Rpl34	3038	4068	3063	3398	2911	3921	3523	3313	4180	9495	141.42	202.394	144.827	164.444	141.32	185.783	151.26	157.883	205.061	465.238	0.032591	0.712062	up
NewGene_10008	NewGene_10008	237	418	133	195	557	219	168	239	191	44	3.06623	4.01107	1.49166	2.36153	6.70218	2.16426	1.82234	2.07755	2.74567	0.297074	0.046915	-0.7626	down
ENSMUSG00000028037	Ifi44	79	82	75	68	91	41	44	71	44	37	0.713489	0.710716	0.628049	0.59861	0.786647	0.355392	0.358656	0.649849	0.41104	0.321424	0.00366525	-0.67077	down
ENSMUSG00000028033	Kcnq5	326	271	400	309	581	243	303	251	243	132	1.32037	0.988201	1.41175	1.14589	2.23314	0.877016	1.03451	0.954899	0.950798	0.487129	0.0045571	-0.633101	down
ENSMUSG00000033114	Slc35d2	43	86	58	58	35	94	97	105	78	42	0.493178	1.02259	0.618001	0.642141	0.381784	1.32454	0.98868	1.20485	0.92238	0.458503	0.0465583	0.601502	up
NewGene_7917	NewGene_7917	154	99	122	120	160	186	255	198	172	269	3.99169	2.51061	2.92352	3.01859	3.75849	4.46342	5.93695	5.17622	4.43505	6.80882	0.00081026	0.815064	up
NewGene_1459	NewGene_1459	616	741	387	590	592	242	360	370	350	287	8.47169	9.7627	4.93364	7.91595	7.72734	3.15575	4.42037	5.09629	4.92784	3.82248	3.10806e-05	-0.778606	down
ENSMUSG00000067279	Ppp1r3c	15426	16347	22541	25486	23794	4203	7155	5168	6148	10428	150.499	152.772	203.873	242.676	220.57	39.0221	62.3499	50.5324	61.5717	98.5286	2.13598e-07	-1.5214	down
ENSMUSG00000047443	Erfe	101	240	140	73	96	97	28	41	58	41	0.942552	2.16295	1.2445	0.668432	0.87255	0.8655	0.251717	0.379853	0.564909	0.370082	0.00096891	-1.26494	down
ENSMUSG00000036452	Arhgap26	246	339	335	355	392	458	368	773	431	549	0.825073	1.18225	1.08591	1.34621	1.33395	1.63456	1.1052	2.64025	1.48786	1.99037	0.00183618	0.721382	up
ENSMUSG00000090553	Snrpe	315	578	415	676	304	417	652	589	669	1121	13.2349	27.6263	15.585	34.498	11.9033	18.672	29.9873	30.5796	36.1064	56.8911	0.0349093	0.717053	up
ENSMUSG00000021033	Gstz1	1596	2124	1256	1959	2403	4842	1450	1213	2933	4020	25.7458	33.1093	18.6786	30.923	37.1388	77.0357	20.7863	19.4961	48.8472	62.9946	0.029816	0.737876	up
ENSMUSG00000024785	Rcl1	296	372	247	348	416	647	440	466	433	516	4.31338	5.20304	3.31878	4.99909	5.74579	9.00355	5.75535	6.8525	6.50859	7.31815	1.27703e-05	0.662174	up
NewGene_1642	NewGene_1642	74	66	50	74	62	31	20	49	47	47	0.681056	0.618744	0.426432	0.670081	0.594591	0.321712	0.159404	0.454114	0.491971	0.58089	0.0331331	-0.66193	down
NewGene_6386	NewGene_6386	54	81	37	48	93	57	45	45	27	15	0.507393	0.731982	0.320158	0.439638	0.835947	0.513528	0.375452	0.420523	0.257629	0.137765	0.0432714	-0.66599	down
ENSMUSG00000016128	Stard13	550	415	561	574	555	339	469	308	334	132	2.95036	1.87799	2.43798	2.62737	2.5328	1.51367	1.96743	1.44635	1.60687	0.600184	0.0029414	-0.727571	down
NewGene_3877	NewGene_3877	32	39	16	82	38	77	87	45	42	124	1.54669	1.81231	0.713859	3.86558	1.72728	3.52617	3.73041	2.14261	2.06114	5.81786	0.0282811	0.999501	up
ENSMUSG00000037112	Sik2	258	421	154	347	628	1178	232	370	516	886	1.70236	2.51235	0.935027	2.03963	3.60681	7.02231	1.26604	2.18371	3.35055	5.48461	0.0195369	0.953812	up
ENSMUSG00000037991	Rmi2	39	79	43	59	82	28	19	47	22	26	0.27231	0.536723	0.280408	0.405927	0.551033	0.186533	0.120332	0.330118	0.153746	0.177526	0.00193889	-0.98955	down
ENSMUSG00000035849	Krt222	65	77	85	117	99	41	27	45	47	30	0.560411	0.65432	0.711446	1.05178	0.808919	0.331489	0.205897	0.388873	0.415365	0.251112	1.89695e-06	-1.15938	down
ENSMUSG00000041559	Fmod	2040	4340	717	902	3222	968	985	1514	950	910	17.3819	35.4227	5.66296	7.49722	26.0861	7.84502	7.4958	12.9258	8.30545	7.50289	0.0126628	-0.948554	down
ENSMUSG00000048373	Fgfbp1	230	368	251	304	222	97	134	177	183	54	4.90299	6.82128	3.94854	6.52987	4.50985	1.88057	2.20591	3.55228	3.00485	0.630757	0.000212085	-1.05463	down
ENSMUSG00000030428	Ttyh1	126	265	197	129	123	170	96	76	73	84	0.9914	1.99348	1.68327	1.12631	0.828616	1.32526	0.628276	0.656546	0.569946	0.552002	0.01897	-0.71839	down
ENSMUSG00000023078	Cxcl13	135	69	28	37	79	333	183	60	127	331	3.11212	1.52425	0.588374	0.823557	1.72916	7.32154	3.76804	1.38316	2.99043	7.40905	0.000885954	1.67446	up
ENSMUSG00000035105	Egln3	577	309	868	1075	765	1268	2306	1057	1039	2546	5.75618	2.95614	8.03454	10.4759	7.25854	12.0457	20.57	10.5721	10.65	24.6239	0.000675077	1.29892	up
NewGene_3526	NewGene_3526	67	95	42	58	85	64	108	144	119	128	1.34301	1.84362	0.772509	1.13972	1.63148	1.21773	1.9537	2.91261	2.46046	2.51185	0.00546648	0.815922	up
ENSMUSG00000001763	Tspan33	91	71	59	90	106	39	54	43	36	55	1.20569	0.887628	0.715905	1.15988	1.33455	0.49175	0.633158	0.574246	0.485286	0.704609	0.00208771	-0.780015	down
ENSMUSG00000073830	Mup14	69	51	6	13	90	403	74	91	33	847	2.46277	1.73732	0.150171	0.343463	2.44982	13.7584	1.89847	2.59949	0.973221	23.5681	0.00306238	2.92425	up
ENSMUSG00000074826	Gm10767	54	45	24	44	61	43	29	18	33	13	0.770262	0.622221	0.324915	0.615374	0.798555	0.594356	0.344002	0.283941	0.481221	0.160969	0.0350783	-0.696353	down
ENSMUSG00000040952	Rps19	3663	4589	3730	4030	2966	5417	4142	4437	5867	9595	126.08	155.751	134.972	138.716	109.161	200.003	130.324	150.435	239.784	340.622	0.00906949	0.744269	up
ENSMUSG00000020287	Mpg	109	100	83	131	100	157	136	94	121	228	1.60206	1.37055	1.20971	2.07339	1.47739	2.15863	1.76277	1.4172	1.80367	3.246	0.0422072	0.601743	up
NewGene_2688	NewGene_2688	93	145	122	143	109	220	110	144	210	215	4.63569	6.88739	5.62616	6.96089	5.12735	10.3964	4.88157	7.17315	10.7117	10.357	0.0134715	0.631638	up
ENSMUSG00000057278	Snrpg	250	187	192	443	310	454	389	468	389	911	6.29775	4.49808	4.47516	10.8864	7.41657	10.8731	8.74594	11.8157	10.0565	22.2177	0.00188776	1.06167	up
ENSMUSG00000034664	Itga2b	34	51	26	39	48	31	30	17	34	13	0.261562	0.374526	0.183003	0.288341	0.351953	0.22154	0.205774	0.12835	0.269798	0.095191	0.0450338	-0.604034	down
ENSMUSG00000029452	Tmem116	31	31	42	32	35	46	64	41	42	61	0.678833	0.57148	0.746935	0.585493	0.538572	0.812199	1.11821	0.774774	0.69266	1.1787	0.0270526	0.646558	up
ENSMUSG00000028584	Lrrc38	747	1215	412	1021	1183	505	298	931	708	250	8.53821	13.3093	4.36186	11.3977	12.858	5.49574	3.03573	10.6684	8.30399	2.76833	0.0375476	-0.687991	down
ENSMUSG00000020131	Pcsk4	41	56	58	65	47	149	59	49	87	126	0.419832	0.556842	0.556356	0.656442	0.458988	1.48127	0.551431	0.51389	0.927153	1.26949	0.0108073	0.887826	up
ENSMUSG00000014773	Dll1	155	208	127	266	295	109	75	162	126	51	1.14653	1.48571	0.872712	2.12631	2.07561	0.76729	0.493107	1.26596	0.993155	0.363585	0.000832363	-0.934199	down
ENSMUSG00000040003	Magi2	73	70	86	69	101	60	15	46	66	23	0.293271	0.269084	0.318504	0.269575	0.387452	0.230765	0.073621	0.185908	0.272424	0.089167	0.0101304	-0.894627	down
ENSMUSG00000056313	Tcim	2241	2041	3264	3240	3199	1981	1126	1491	1587	1448	33.002	28.7862	44.5682	46.5751	44.761	27.7672	14.8102	22.0137	23.9892	20.6415	2.86008e-05	-0.818914	down
NewGene_4397	NewGene_4397	49	53	59	48	36	86	60	60	75	161	1.29215	1.35182	1.45883	1.23885	0.900702	2.1684	1.42271	1.60487	2.04984	4.1565	0.0125585	0.957577	up
NewGene_6890	NewGene_6890	37	57	39	40	35	57	87	41	56	78	1.20139	1.8145	1.17893	1.27911	1.07854	1.80121	2.57667	1.33404	1.88873	2.4978	0.0216152	0.703618	up
ENSMUSG00000034586	Hid1	89	138	115	124	114	69	82	56	81	54	0.718341	1.06239	0.863129	0.990946	0.872977	0.525561	0.589762	0.449042	0.669253	0.424106	0.000272752	-0.702786	down
ENSMUSG00000025650	Col7a1	111	222	62	51	165	45	61	49	48	31	0.31884	0.608748	0.163564	0.140258	0.448734	0.121629	0.154953	0.139135	0.138703	0.084788	0.00040244	-1.29185	down
NewGene_468	NewGene_468	95	141	72	58	122	143	139	193	130	119	2.20561	3.11707	1.53131	1.28091	2.80395	3.08828	2.90271	4.67221	3.19706	2.74254	0.00673889	0.652104	up
NewGene_2254	NewGene_2254	146	152	250	164	152	304	353	270	331	451	2.32813	2.38337	3.59299	2.57741	2.51576	4.77679	5.36268	4.71552	5.78935	7.90446	0.000120343	1.05473	up
ENSMUSG00000002108	Nr1h3	672	671	536	739	691	1144	665	752	1002	1119	9.80854	9.56256	7.43688	10.6622	9.75682	15.9935	8.83523	11.1534	15.2257	16.0156	0.00267072	0.585352	up
ENSMUSG00000093445	Lrch4	208	315	352	111	294	85	106	238	201	19	1.88349	2.66874	2.8107	0.96244	2.46806	0.728255	0.835627	2.05548	1.78078	0.216413	0.0474762	-0.970069	down
ENSMUSG00000110439	Mup22	471	275	9	40	300	5735	833	117	105	710	14.5372	8.11538	0.250595	1.19949	8.78639	168.535	22.9538	3.60169	3.30268	21.2281	0.0174308	2.75772	up
NewGene_2113	NewGene_2113	993	1093	1070	956	1061	1544	1542	1116	1284	1997	41.7422	43.3716	40.6163	38.3339	39.6911	65.6614	56.5761	47.1967	57.2498	77.6035	0.00322274	0.624402	up
ENSMUSG00000039246	Lyplal1	53	72	43	66	87	221	48	70	84	240	0.877915	1.16172	0.657866	1.08225	1.38716	3.53149	0.722002	1.1752	1.43881	3.90577	0.0080064	1.1874	up
ENSMUSG00000071657	Bscl2	691	1056	559	936	1372	2451	576	641	1474	2488	10.3967	15.0938	7.92433	13.0825	19.9512	37.2331	7.35436	9.16022	23.084	35.1027	0.0290823	0.866502	up
ENSMUSG00000044847	Lsm11	117	146	80	132	150	101	78	109	76	33	0.480894	0.574405	0.303565	0.530266	0.586799	0.392729	0.283604	0.447534	0.318529	0.129998	0.0151155	-0.602828	down
ENSMUSG00000079641	Rpl39	2395	2670	2091	2374	1539	2851	2431	2455	3105	7241	104.034	111.079	84.1843	100.643	63.4949	117.848	94.3115	106.893	138.453	304.619	0.0192236	0.844013	up
NewGene_4063	NewGene_4063	31	71	58	114	70	30	27	39	34	29	0.584051	0.78567	0.762472	1.32038	1.46179	0.351567	0.364199	0.495146	0.465215	0.470249	0.00176331	-1.03114	down
NewGene_966	NewGene_966	213	135	491	426	336	267	230	133	188	110	1.47111	0.888323	3.14745	2.87478	2.20528	1.75241	1.41993	0.919885	1.33318	0.73139	0.0249161	-0.783233	down
ENSMUSG00000008153	Clstn3	57	70	44	113	93	228	36	43	137	323	0.402462	0.917246	0.269552	1.49048	0.866281	4.0004	0.300255	0.283271	1.34319	5.66477	0.0300095	1.18888	up
ENSMUSG00000057322	Rpl38	1122	1155	1349	1317	846	1455	1570	1315	1655	2953	80.6057	79.5625	89.7559	92.1403	57.7322	99.1513	100.616	94.7577	121.421	204.925	0.0155598	0.729771	up
NewGene_9194	NewGene_9194	91	117	103	177	79	50	54	109	78	16	0.991606	1.22497	1.04072	1.89346	0.820431	0.51819	0.530136	1.1958	0.880531	0.167961	0.0302693	-0.863327	down
ENSMUSG00000024803	Ankrd1	275	237	64	218	320	392	731	548	288	162	3.60173	2.98317	0.780352	2.79028	4.00056	4.90915	8.57674	7.22681	3.87878	2.06414	0.00959825	1.00335	up
NewGene_3904	NewGene_3904	190	318	176	233	251	130	61	176	172	72	1.83508	2.94275	1.62495	2.19456	2.30002	1.18969	0.526142	1.70998	1.70195	0.668869	0.00176269	-0.87535	down
ENSMUSG00000026837	Col5a1	820	663	445	821	1941	883	556	543	497	259	2.99505	2.05023	1.30783	2.53216	6.15007	2.70972	1.71095	1.7781	1.61228	0.792865	0.0256362	-0.696465	down
ENSMUSG00000102805	Gm37240	29	43	31	32	31	44	66	54	45	39	0.258977	0.368547	0.261181	0.281394	0.266917	0.375409	0.535156	0.493584	0.418075	0.3433	0.011516	0.644018	up
ENSMUSG00000029228	Lnx1	487	338	758	715	853	461	599	270	418	197	5.07112	3.35333	7.33906	7.22739	8.39864	4.54404	5.58686	2.85535	4.46463	1.97769	0.0237451	-0.666923	down
ENSMUSG00000006050	Sra1	1274	1584	1557	1263	1540	1896	2593	1678	1730	3841	18.7133	20.3843	22.0047	22.2924	19.6472	27.0914	37.6024	29.2652	27.585	56.5943	0.00397805	0.823751	up
NewGene_7866	NewGene_7866	560	664	531	411	648	1070	793	606	788	1313	14.6084	16.9368	13.5056	11.21	16.4009	28.4162	19.5466	16.482	21.683	35.1346	0.00147483	0.803933	up
ENSMUSG00000041607	Mbp	1771	1495	3315	1910	1974	1677	1523	1112	1799	258	23.0125	18.5708	40.6589	25.0889	24.3648	20.5149	17.9137	14.7255	23.9049	2.77211	0.0474025	-0.750885	down
NewGene_2097	NewGene_2097	39	50	28	52	40	60	54	66	79	46	1.42857	1.72811	0.92475	1.84783	1.3937	2.07876	1.73877	2.39831	2.94154	1.61411	0.00905515	0.61114	up
ENSMUSG00000002032	Tmem25	143	125	188	274	164	117	97	94	95	69	1.40779	1.16514	1.82128	2.7327	1.4521	1.0958	0.85591	0.880282	1.02499	0.613383	0.000258027	-0.881446	down
ENSMUSG00000078193	Gm2000	268	303	269	256	212	299	343	257	360	996	15.974	17.3012	14.8455	14.8891	11.9793	16.955	18.2878	15.3813	22.0264	57.6276	0.0201549	0.939719	up
ENSMUSG00000000305	Cdh4	107	382	100	166	260	56	25	167	134	29	0.442836	1.55738	0.408808	0.783539	1.02691	0.219039	0.090812	0.696279	0.795814	0.11681	0.0159423	-1.2164	down
ENSMUSG00000020546	Stxbp4	354	488	290	413	563	169	256	334	244	101	1.60716	2.10152	1.20455	1.83659	2.36956	0.743914	1.07082	1.57695	1.10683	0.433481	0.000618613	-0.862319	down
ENSMUSG00000021792	Prxl2a	1407	1999	1198	1728	2076	4333	1169	1079	2603	4403	24.2675	33.3125	19.0152	29.2803	34.1272	71.988	17.9618	18.4533	46.4191	74.2088	0.0297874	0.815823	up
ENSMUSG00000072294	Klf12	110	116	69	165	148	74	101	84	53	49	0.492585	0.533638	0.332375	0.725698	0.630622	0.313823	0.47507	0.378585	0.242772	0.211435	0.00785347	-0.675165	down
ENSMUSG00000027327	1700037H04Rik	149	240	133	317	216	532	112	178	426	570	3.08504	4.97461	2.62943	6.59703	4.43987	10.9038	2.1565	3.80589	9.2873	11.9657	0.0300792	0.9051	up
ENSMUSG00000042453	Reln	172	173	239	213	269	191	204	118	133	38	0.389821	0.376424	0.503099	0.470869	0.580676	0.411634	0.412091	0.266641	0.308825	0.083619	0.0479706	-0.627586	down
ENSMUSG00000042451	Mybph	7133	12338	7273	5979	4155	1552	1885	2593	2986	2174	102.381	169.456	95.781	81.8193	55.0914	20.8165	24.4341	37.1686	43.1972	29.9165	1.35524e-08	-1.65593	down
ENSMUSG00000101389	Ms4a4a	42	54	11	39	68	117	83	47	54	81	1.32739	1.62588	0.305834	1.19392	2.02692	3.52805	2.35263	1.47535	1.73662	2.49268	0.0136569	0.949843	up
ENSMUSG00000038797	Zscan2	55	49	71	38	54	27	36	25	48	21	0.624931	0.744618	0.852925	0.631791	0.876985	0.33124	0.385372	0.280187	0.558131	0.230953	0.0198899	-0.733018	down
ENSMUSG00000020737	Jpt1	1469	1905	1105	1253	1413	1922	1849	2294	2116	2634	28.3906	35.2676	19.789	23.6405	25.9587	35.3619	31.9345	44.4598	41.982	49.3189	0.000425375	0.698518	up
ENSMUSG00000052276	Ostn	159	304	205	175	82	73	81	197	97	73	2.96908	5.42903	3.5448	3.18411	1.44133	1.29671	1.33916	3.67296	1.85004	1.30677	0.0415672	-0.784771	down
ENSMUSG00000026773	Pfkfb3	20239	16959	26546	23050	33370	42263	46148	31758	40898	25791	115.092	92.2061	139.329	127.88	181.211	230.996	236.381	180.835	238.042	144.578	0.000152945	0.687301	up
ENSMUSG00000006191	Cdkal1	889	1054	866	705	1025	1155	1298	1314	1346	1344	9.23249	10.2773	8.13842	6.97797	10.0082	11.1949	11.7242	13.3447	14.1412	13.1574	0.000129966	0.591073	up
ENSMUSG00000061100	Retnla	736	1089	245	1309	1227	617	486	426	434	376	32.6669	46.2888	10.0552	56.662	51.7312	26.0044	19.2611	18.8813	19.769	16.1366	0.00427041	-0.876556	down
ENSMUSG00000060477	Irak2	464	428	735	761	815	547	509	337	346	220	3.85425	3.40415	5.66439	6.17132	6.44935	4.32705	3.78089	2.8029	2.94868	1.7673	0.00487479	-0.67728	down
ENSMUSG00000056832	Ttc26	60	64	49	72	61	55	34	50	43	10	0.375262	0.384334	0.286671	0.434713	0.358851	0.324875	0.188081	0.309122	0.276023	0.055694	0.0439049	-0.649572	down
NewGene_10494	NewGene_10494	22	38	45	21	37	87	151	90	71	163	1.22135	2.01905	2.32	1.12709	1.95362	4.60924	7.53009	5.02695	4.02099	8.78082	4.17668e-07	1.89104	up
ENSMUSG00000026525	Opn3	54	101	15	72	87	228	29	48	124	246	0.740139	1.33361	0.185526	0.971584	1.14549	3.00746	0.35287	0.668082	1.7624	3.30341	0.0365027	1.20149	up
NewGene_5520	NewGene_5520	56	72	62	38	33	83	118	48	53	128	2.15854	2.55981	2.41152	1.893	1.5047	3.3649	4.22514	1.7229	1.9841	5.05881	0.0431562	0.804027	up
ENSMUSG00000022371	Col14a1	241	247	111	323	469	239	166	110	150	63	1.58104	1.59027	0.664252	2.05211	3.3436	1.63458	0.999919	0.68089	1.09053	0.341556	0.00698847	-0.86813	down
ENSMUSG00000022372	Sla	31	44	14	11	31	48	47	39	26	64	0.278177	0.374315	0.112268	0.090653	0.265274	0.408334	0.377045	0.350996	0.234584	0.563044	0.0356305	0.897303	up
ENSMUSG00000027597	Ahcy	1443	1728	1325	1347	1655	1627	1920	1648	1601	3652	15.0845	17.2959	12.8385	13.7424	16.4333	16.1694	17.9257	17.2646	17.1748	36.9714	0.0328959	0.619081	up
ENSMUSG00000014813	Stc1	33	48	66	71	107	29	57	30	27	26	0.205751	0.287753	0.386288	0.433471	0.640721	0.170812	0.318275	0.187146	0.169939	0.156931	0.0137891	-0.855981	down
ENSMUSG00000031298	Adgrg2	85	173	28	82	178	363	56	77	182	434	0.477975	0.963834	0.145953	0.451898	0.971738	2.09055	0.282049	0.434651	1.06507	2.39114	0.0310385	1.21575	up
ENSMUSG00000069892	9930111J21Rik2	61	73	48	79	105	48	50	58	60	14	0.269069	0.333349	0.190049	0.339848	0.459372	0.198155	0.194453	0.251648	0.288109	0.057526	0.0445379	-0.613192	down
ENSMUSG00000032177	Pde4a	747	797	751	1084	1247	561	549	819	695	259	4.35164	4.48015	4.00576	6.18274	7.0098	3.1044	2.86113	4.77313	4.22471	1.43176	0.00569615	-0.627376	down
ENSMUSG00000060572	Mfap2	86	94	57	82	157	84	52	61	41	43	2.11038	2.22654	1.28967	1.97417	3.67762	1.96712	1.1406	1.51189	1.03895	1.00817	0.00896261	-0.676168	down
ENSMUSG00000027204	Fbn1	1990	1465	977	1675	3032	1661	1441	855	994	445	5.36439	3.78749	2.44506	4.41085	7.7759	4.26753	3.47241	2.30775	2.75346	1.1626	0.0138115	-0.707712	down
ENSMUSG00000029314	Gpat3	351	429	301	433	625	1088	287	250	619	1128	3.46605	4.29907	3.06477	4.25877	6.06947	10.2243	2.74709	2.38355	6.19713	9.9027	0.0478089	0.79065	up
ENSMUSG00000059173	Pde1a	157	204	71	122	211	457	147	189	162	296	1.09307	1.26744	0.450165	0.786641	1.31049	3.1379	0.902122	1.33641	1.09885	1.9264	0.0183239	0.811505	up
ENSMUSG00000030047	Arhgap25	128	122	158	139	122	122	107	61	100	44	0.924756	0.843064	1.05486	1.44452	0.866998	0.850055	0.687908	0.440701	0.742735	0.302067	0.0155161	-0.611491	down
ENSMUSG00000029482	Aacs	277	440	210	409	434	958	230	294	592	1112	2.27053	3.45381	1.59445	3.27138	3.38284	7.47596	1.68047	2.41481	4.98784	8.83933	0.0147009	0.990406	up
ENSMUSG00000028359	Orm3	8	32	4	2	20	132	125	410	120	283	0.249244	1.0374	0.109469	0.061093	0.635717	4.30587	3.81356	14.1344	4.2247	9.41393	9.93244e-13	4.19748	up
NewGene_10886	NewGene_10886	23	19	29	29	57	51	65	61	53	18	0.462934	0.362746	0.523202	0.5562	1.08513	0.960811	1.15594	1.21738	1.08162	0.346432	0.0484149	0.718734	up
ENSMUSG00000095609	Gm21188	27	30	18	35	33	60	40	31	44	60	0.420387	0.430144	0.252028	0.543829	0.49538	0.886207	0.549204	0.48227	0.706533	0.89552	0.00803596	0.811623	up
ENSMUSG00000058966	Tlcd3b	617	524	1045	984	770	520	513	450	597	440	7.31446	6.04417	11.2896	11.075	8.62055	5.78088	5.37175	5.31156	7.10207	4.96627	0.00751773	-0.603557	down
NewGene_4616	NewGene_4616	1701	2105	2399	1594	251	6436	12071	12851	8639	13831	11.3638	10.4505	24.2626	7.99637	2.7273	43.6989	69.5788	86.0616	56.6221	84.2031	1.08395e-06	2.7898	up
ENSMUSG00000042109	Csdc2	52	65	41	56	69	33	27	23	51	20	0.552877	0.663536	0.403847	0.577935	0.697296	0.325306	0.248236	0.242709	0.557096	0.196954	0.00257695	-0.81477	down
ENSMUSG00000027834	Serpini1	127	167	177	203	179	90	143	141	81	27	0.824487	1.0352	1.06502	1.28189	1.10522	0.555361	0.824375	0.918244	0.535125	0.16427	0.016964	-0.794304	down
ENSMUSG00000000753	Serpinf1	2311	2740	1178	2280	4437	2140	1870	1451	1570	1068	33.7468	38.8439	15.9391	32.4343	62.4867	29.9677	24.5431	21.5831	23.5402	15.381	0.0113221	-0.585	down
NewGene_2149	NewGene_2149	56	159	31	52	74	38	46	57	28	10	0.650924	1.41156	0.403246	0.440901	0.711803	0.407658	0.414566	0.603539	0.27061	0.083189	0.0318315	-0.988259	down
ENSMUSG00000040152	Thbs1	817	648	785	286	586	408	535	318	316	210	3.70988	2.81899	3.30697	1.26838	2.53084	1.76368	2.17052	1.44538	1.47108	0.921879	0.00885862	-0.792856	down
ENSMUSG00000102976	Zc3h11a	3069	82	23	37	65	178	34	47	27	25	18.5556	2.00765	0.517541	1.20548	2.06347	1.96741	0.75128	1.47646	0.933305	0.737096	0.006616	-3.51475	down
ENSMUSG00000068270	Shroom4	627	546	750	834	896	547	565	503	535	223	2.03113	1.69485	2.2513	2.65623	2.75927	1.6874	1.63593	1.63255	1.7772	0.699113	0.00419669	-0.58933	down
ENSMUSG00000118552	Rplp2-ps1	145	201	184	209	114	251	175	199	218	424	11.0274	14.7076	12.9659	15.5728	8.24617	18.2231	11.9373	15.1675	17.0945	31.3383	0.0407384	0.675632	up
ENSMUSG00000117679	Apbb3	486	635	607	444	635	976	1570	778	768	1562	6.28763	7.89488	7.28629	5.57734	7.79624	12.0692	18.3091	10.162	10.1528	19.694	5.49037e-05	1.11616	up
NewGene_3178	NewGene_3178	271	267	177	228	340	74	132	119	199	108	2.31086	2.07581	1.28617	1.72781	2.12714	0.819916	1.09023	0.882607	1.97996	1.1162	0.000207683	-0.932334	down
ENSMUSG00000093593	Gm20683	183	421	210	171	346	838	353	328	336	642	1.73663	3.8403	1.85476	1.58141	3.13066	7.59141	2.99752	3.13241	3.28254	5.924	0.00195576	1.0139	up
ENSMUSG00000052137	Rbm12b2	196	221	130	199	319	170	121	145	140	62	1.5623	1.69174	0.9599	1.54559	2.43251	1.28547	0.878704	1.16522	1.14311	0.478259	0.00214515	-0.675878	down
ENSMUSG00000048218	Amigo2	205	321	276	321	427	247	212	195	183	112	1.81584	2.80887	2.26097	2.776	3.58984	2.13914	1.67611	1.80601	1.6575	0.960818	0.000257016	-0.647376	down
ENSMUSG00000044006	Cilp2	124	120	45	42	150	41	49	69	21	19	0.762886	0.705087	0.255606	0.247929	0.8749	0.236366	0.26608	0.422252	0.128806	0.111492	0.00556099	-1.19403	down
ENSMUSG00000061859	Patj	52	47	53	28	76	45	29	27	28	29	0.345875	0.160882	0.175699	0.096383	0.25622	0.150736	0.0905	0.093959	0.099536	0.098146	0.0350405	-0.630904	down
ENSMUSG00000038550	Ciart	353	444	288	346	156	680	635	737	682	433	6.42281	7.46144	4.95002	5.90428	2.72393	12.1949	10.6226	14.4737	13.7947	8.24741	6.14633e-05	1.02696	up
ENSMUSG00000015243	Abca1	1136	1582	756	1368	1978	3656	2285	1537	2076	1456	2.94213	3.92422	1.81564	3.45829	4.86816	9.01237	5.28696	3.98894	5.52059	3.65096	0.000714435	0.759386	up
NewGene_6415	NewGene_6415	91	132	77	132	75	39	35	89	62	37	2.02788	2.57741	1.42937	2.80316	1.36317	0.703708	0.739531	1.91898	1.34922	0.854475	0.00557252	-0.889511	down
ENSMUSG00000039196	Orm1	51	145	13	97	130	703	114	225	297	672	1.74752	4.7523	0.396465	3.21495	4.22113	22.9192	3.49309	7.73448	10.4251	22.3141	0.000343138	2.38016	up
ENSMUSG00000089873	Mup13	118	75	9	20	126	621	136	123	53	464	3.16168	1.92779	0.200879	0.505769	3.23339	15.9615	3.27465	3.32863	1.44436	12.1389	0.0101759	2.1471	up
ENSMUSG00000069372	Ctxn3	1851	2350	1891	1512	1518	3324	3141	2224	2729	5360	36.0283	43.6206	34.1285	28.668	27.7302	61.3407	54.9539	43.3145	54.4275	101.36	0.000579264	0.984705	up
NewGene_9127	NewGene_9127	52	44	32	51	49	54	65	61	50	119	1.85265	1.73388	1.12106	1.77865	1.60342	1.99615	2.06467	2.02232	1.80966	4.28845	0.032524	0.745924	up
ENSMUSG00000042662	Dusp15	50	47	97	98	63	47	39	47	45	15	0.534252	0.391482	0.806204	0.919068	0.54899	0.403668	0.308639	0.486316	0.407665	0.124741	0.0125539	-0.871679	down
ENSMUSG00000028194	Ddah1	136	120	215	207	215	109	81	121	119	58	0.958085	0.807709	1.4058	1.4257	1.44268	0.726534	0.510608	0.853488	0.86053	0.390372	0.000735046	-0.833757	down
ENSMUSG00000018217	Pmp22	3803	3214	6222	4963	4689	3643	3255	2358	3653	1020	55.7515	45.4106	84.4344	71.431	66.0867	51.1099	42.8356	34.8499	54.9061	14.5499	0.010534	-0.723614	down
ENSMUSG00000025277	Abhd6	229	266	211	246	245	483	283	197	217	645	2.72342	3.0352	2.32669	2.86311	2.80128	5.48918	3.12162	2.34855	2.65733	7.45116	0.0341229	0.731419	up
ENSMUSG00000029298	Gbp9	427	575	453	563	816	423	346	324	435	125	2.58594	3.33979	2.54773	3.32908	4.70372	2.43831	1.87527	1.96704	2.70743	0.72956	0.00182847	-0.7318	down
NewGene_3859	NewGene_3859	234	286	258	285	165	321	285	282	418	657	11.5359	13.5096	11.7924	13.7001	7.71981	15.0442	12.5505	13.9213	21.1431	31.3677	0.0160581	0.783699	up
ENSMUSG00000067158	Col4a4	157	200	85	117	361	155	127	96	107	35	0.411059	0.503198	0.204868	0.299112	0.900801	0.38601	0.29615	0.250695	0.287412	0.088765	0.0365885	-0.748793	down
ENSMUSG00000057604	Lmcd1	2052	1328	3265	3681	2394	4828	5464	3048	3590	2287	31.5328	19.5377	46.5088	55.2099	34.9435	70.6007	75.0057	46.9458	56.6325	34.0373	0.0341334	0.609049	up
ENSMUSG00000032846	Zswim6	107	144	95	128	210	103	76	87	74	40	0.53175	0.690214	0.439424	0.621995	0.998661	0.486785	0.335557	0.429965	0.375597	0.18979	0.000393033	-0.779631	down
ENSMUSG00000020097	Sgpl1	550	843	346	673	1047	1913	588	425	870	1659	3.51141	5.27334	2.06334	4.26405	6.44167	11.8082	3.41267	2.75048	5.8037	10.4444	0.0410574	0.79299	up
ENSMUSG00000033717	Adra2a	59	46	28	49	57	27	39	33	27	12	0.323165	0.281028	0.141391	0.258439	0.295373	0.140371	0.190503	0.177922	0.147306	0.063731	0.018021	-0.737035	down
ENSMUSG00000037411	Serpine1	312	250	376	334	240	875	829	244	349	345	2.75298	2.11406	3.07123	2.87786	2.00918	7.34657	6.53785	2.15177	3.15813	2.9423	0.0159845	0.807243	up
ENSMUSG00000032437	Stt3b	3280	4150	3469	3555	4380	5750	5124	4234	4469	7635	20.6546	25.0338	20.2509	21.8522	26.2083	34.4641	28.8257	26.7258	28.8939	46.5725	0.00261902	0.641216	up
ENSMUSG00000044786	Zfp36	2167	1283	2647	1316	1673	1422	1247	1008	933	1274	20.8006	11.8055	23.5334	12.3225	15.1445	12.9501	10.625	9.61747	9.20155	11.7558	0.0277004	-0.591247	down
ENSMUSG00000044788	Fads6	222	236	202	467	381	191	198	247	162	108	1.19024	1.21118	1.00342	2.44401	1.9389	0.974003	0.949321	1.3292	0.892761	0.557712	0.00740701	-0.664916	down
ENSMUSG00000027111	Itga6	760	770	952	1039	1373	807	642	692	686	276	4.76731	4.6228	5.52064	6.33278	8.18381	4.81342	3.5878	4.34717	4.3936	1.66634	0.00360832	-0.618501	down
ENSMUSG00000021091	Serpina3n	862	248	89	156	364	2730	291	365	876	1054	11.0942	3.05692	1.05448	1.95907	4.44432	33.4627	3.34335	4.70552	11.5784	13.1427	0.0272827	1.64567	up
ENSMUSG00000021097	Clmn	182	364	158	257	405	766	181	184	312	817	0.533437	0.826768	0.342368	0.589091	0.976251	1.76315	0.435986	0.416234	0.765207	1.92282	0.0458149	0.884129	up
ENSMUSG00000027230	Creb3l1	135	165	110	179	325	132	76	91	137	45	1.37261	1.61037	1.03535	1.78261	3.15148	1.28174	0.684521	0.929888	1.42818	0.444864	0.00282956	-0.854317	down
ENSMUSG00000029321	Slc10a6	426	287	664	315	461	359	350	166	244	196	5.32412	3.43108	7.70022	3.84667	5.47574	4.27312	3.90472	2.07785	3.12622	2.36817	0.0174263	-0.699565	down
NewGene_1337	NewGene_1337	64	69	115	45	59	52	8	9	27	32	1.55528	1.52556	2.57452	1.03101	1.30709	1.2044	0.17472	0.200404	0.644073	0.71144	0.00443443	-1.43981	down
ENSMUSG00000075330	A930003A15Rik	162	174	76	108	86	184	208	157	104	322	4.06316	4.32939	1.88786	2.81198	1.99782	4.44362	4.61647	3.94344	2.72736	7.79065	0.0297641	0.806238	up
ENSMUSG00000027187	Cat	7589	8432	7488	7792	13133	22492	9141	6432	9489	20725	77.2121	82.1748	70.6262	77.3739	126.953	217.795	83.0718	65.5973	99.1045	204.212	0.0254672	0.736587	up
ENSMUSG00000030037	Mrpl53	148	389	935	626	682	755	971	1115	884	1302	5.62845	14.2258	33.1315	23.3429	24.7592	27.4866	33.1693	42.7487	34.6914	48.2337	0.0166769	0.943188	up
ENSMUSG00000030031	Kbtbd8	85	121	48	169	224	87	82	96	77	43	0.46177	0.62918	0.240577	0.896187	1.16048	0.448607	0.399442	0.520477	0.430188	0.223972	0.0449073	-0.649199	down
ENSMUSG00000037020	Wdr62	102	153	109	94	222	241	334	149	103	224	0.635339	0.949143	0.779979	0.692682	1.30415	1.59953	2.14485	0.838332	0.611781	1.64032	0.0219375	0.739191	up
ENSMUSG00000031070	Mrgprf	83	114	47	109	188	75	64	85	57	23	1.05729	1.39068	0.54631	1.35503	2.2657	0.907505	0.722219	1.07765	0.736074	0.274302	0.0252623	-0.74944	down
ENSMUSG00000028836	Slc30a2	390	536	568	308	570	783	1140	652	499	864	3.91563	5.18007	4.44662	2.60653	4.64972	6.33599	8.88481	6.58805	4.78855	7.11859	0.00212018	0.812328	up
ENSMUSG00000047945	Marcksl1	57	59	67	68	76	44	15	43	33	39	0.942327	0.925105	1.02804	1.08899	1.18535	0.688707	0.213371	0.710325	0.556953	0.61464	0.00496362	-0.837171	down
NewGene_1270	NewGene_1270	120	132	155	130	126	124	103	43	88	44	0.928747	0.978641	1.19772	0.98207	0.926332	0.915746	0.769589	0.360461	0.698808	0.360836	0.0110665	-0.707318	down
ENSMUSG00000038855	Itpkb	1490	1432	2026	2646	2369	1453	1300	1438	1499	594	6.35351	5.84707	8.00693	11.0086	9.59455	5.89392	4.94972	6.14212	6.56013	2.45214	0.00462809	-0.631322	down
ENSMUSG00000020014	Cfap54	59	119	77	79	89	55	44	53	70	9	0.17916	0.341271	0.189563	0.206217	0.226599	0.138533	0.10549	0.140815	0.191594	0.02165	0.0210474	-0.847784	down
ENSMUSG00000021948	Prkcd	533	772	656	617	1384	542	586	428	257	449	5.22126	7.11926	5.93194	5.78197	12.6302	5.04227	5.04332	4.15144	2.5268	4.27379	0.00664934	-0.698919	down
ENSMUSG00000062515	Fabp4	33050	39084	34861	41812	39482	115198	28072	24353	57239	77300	980.655	1110.92	958.915	1210.83	1113.1	3253.1	744.06	724.325	1743.5	2221.33	0.0308733	0.751836	up
NewGene_9	NewGene_9	73	97	43	45	118	147	178	173	87	122	1.10217	1.38473	0.612657	0.663605	1.72398	2.09803	2.51594	2.6742	1.33195	1.73826	0.000540467	1.01419	up
ENSMUSG00000054855	Rnd1	83	69	61	94	132	37	78	62	41	32	1.04503	0.797195	0.693642	1.31838	1.50007	0.417779	0.842938	0.752017	0.660043	0.372114	0.0117943	-0.729222	down
ENSMUSG00000057762	Gm6169	84	102	52	73	86	128	130	138	99	140	2.16635	2.50511	1.22563	1.82238	2.09723	3.12308	2.97839	3.55329	2.60804	3.48158	0.000415716	0.770698	up
ENSMUSG00000025479	Cyp2e1	4402	15342	3065	10304	23868	60532	5473	2778	18832	67914	63.9796	213.994	41.3907	145.972	330.469	839.677	71.007	40.4178	281.643	959.824	0.0387866	1.67531	up
ENSMUSG00000039221	Rpl22l1	2031	2823	2209	1608	1681	2613	2840	2385	3039	8359	99.717	132.81	101.229	77.8357	78.4324	122.189	125.769	117.278	154.412	401.592	0.00756667	1.04756	up
ENSMUSG00000068794	Col28a1	86	105	57	62	105	68	49	46	67	23	0.539865	0.625537	0.327921	0.376599	0.622008	0.404	0.272561	0.287833	0.432837	0.139718	0.0115047	-0.664896	down
ENSMUSG00000022901	Cd86	15	50	22	50	42	81	56	31	55	61	0.157001	0.499667	0.204304	0.504851	0.414548	0.804346	0.516012	0.322861	0.588984	0.612926	0.0350243	0.763734	up
ENSMUSG00000046352	Gjb2	35	154	57	54	66	30	51	33	35	17	0.382411	1.62385	0.581915	0.58021	0.686993	0.307077	0.494524	0.357396	0.39301	0.173937	0.00747119	-1.07208	down
ENSMUSG00000026819	Slc25a25	3359	3183	3047	6089	5566	1270	1031	3041	1357	1762	28.5725	27.2702	24.7053	52.9493	46.7887	10.8319	7.85946	26.9771	12.0591	15.0064	6.73814e-05	-1.21678	down
ENSMUSG00000028364	Tnc	72	193	82	64	155	94	38	77	37	27	0.26719	0.690356	0.284132	0.238426	0.55027	0.332498	0.124817	0.287948	0.141364	0.096504	0.00890485	-0.990325	down
ENSMUSG00000027778	Ift80	174	224	156	219	256	164	133	98	139	117	1.13134	1.39428	0.943642	1.38944	1.58833	1.01606	0.777176	0.636208	0.926395	0.736923	0.000106236	-0.585712	down
ENSMUSG00000004267	Eno2	46	52	24	42	48	47	19	18	31	7	0.430082	0.466233	0.206696	0.377751	0.429421	0.416671	0.160479	0.169846	0.292441	0.062827	0.0493526	-0.773022	down
ENSMUSG00000017412	Cacnb4	83	85	43	76	115	123	101	95	115	137	0.26728	0.262619	0.128631	0.238844	0.353069	0.375633	0.290955	0.307527	0.379303	0.42852	0.0106867	0.616704	up
ENSMUSG00000021356	Irf4	87	121	85	107	366	302	213	58	94	2296	0.48203	0.642228	0.437471	0.576667	1.93763	1.60235	1.05707	0.323369	0.532858	12.4013	0.0206752	2.31628	up
ENSMUSG00000009772	Nuak2	47	54	43	68	47	37	24	34	27	15	0.395793	0.442421	0.3365	0.563884	0.375296	0.294909	0.181207	0.28368	0.229558	0.120219	0.00125399	-0.874292	down
NewGene_2780	NewGene_2780	78	57	56	77	130	43	28	54	58	32	1.31408	0.90338	1.05386	1.5131	2.08076	0.668949	0.486981	0.901284	1.125	0.504815	0.00455793	-0.806357	down
ENSMUSG00000031400	G6pdx	264	300	164	348	410	689	296	245	464	471	2.64411	2.8741	1.5181	3.39525	3.90209	6.58787	2.64245	2.45431	4.77287	4.62395	0.0206744	0.636773	up
ENSMUSG00000066058	Cldn19	160	116	200	148	176	115	87	126	133	17	1.37193	0.856998	1.67546	1.11185	1.22968	0.847955	0.603923	1.06793	1.03363	0.208892	0.049626	-0.75116	down
NewGene_5257	NewGene_5257	3391	3367	1837	1679	2463	5774	7860	4507	4062	6746	32.7951	31.1328	16.5575	15.9357	22.5781	53.3335	68.2328	43.6661	40.3404	63.3278	1.82326e-06	1.27294	up
ENSMUSG00000055963	Triqk	36	42	35	47	64	82	40	36	91	92	0.403675	0.299727	0.276443	0.35519	0.587766	0.66682	0.285411	0.267323	0.975551	0.676359	0.0372154	0.714487	up
ENSMUSG00000036634	Mag	54	31	57	69	72	36	45	21	39	4	0.580744	0.320532	0.653747	0.735362	0.740115	0.371946	0.433102	0.226278	0.47344	0.039916	0.0332857	-0.956198	down
ENSMUSG00000037278	Tmem97	106	100	64	97	93	156	89	114	150	168	2.03916	1.84198	1.1384	1.82861	1.70807	2.86208	1.52477	2.19638	2.96555	3.14046	0.00906869	0.646158	up
NewGene_4185	NewGene_4185	86	123	73	123	159	70	67	76	67	38	0.698336	1.01781	0.552268	0.975426	1.23673	0.538234	0.483281	0.620351	0.56035	0.297257	0.000325468	-0.750425	down
NewGene_10019	NewGene_10019	96	188	99	62	138	65	77	72	84	45	1.76029	2.56634	0.962492	0.636253	1.65144	0.717832	0.722058	0.924221	0.907565	0.456286	0.0123342	-0.696484	down
ENSMUSG00000028028	Alpk1	39	58	27	41	65	25	20	36	25	27	0.212583	0.304272	0.132599	0.221074	0.336587	0.130795	0.096053	0.200007	0.142207	0.144841	0.0201859	-0.688491	down
ENSMUSG00000034245	Hdac11	230	229	147	184	233	108	114	169	177	84	2.29667	2.19681	1.36533	1.79277	2.20918	1.02449	1.01501	1.69089	1.8142	0.806963	0.0058643	-0.58673	down
ENSMUSG00000046733	Gprc5a	53	64	66	61	53	25	57	33	38	8	0.671201	0.776964	0.770278	0.759205	0.636596	0.296469	0.647444	0.413328	0.488892	0.096252	0.0233199	-0.86318	down
ENSMUSG00000042436	Mfap4	73	203	65	58	204	64	26	67	48	49	1.12623	2.99925	0.926428	0.86562	2.98412	0.957989	0.350579	1.03177	0.745879	0.720212	0.00432605	-1.12301	down
ENSMUSG00000067288	Rps28	1432	1428	1624	1512	954	1903	1779	1692	1732	3178	99.1337	94.6522	104.033	102.116	62.591	125.364	109.959	117.326	122.866	212.919	0.0214775	0.654261	up
ENSMUSG00000063564	Col23a1	72	81	120	133	125	65	86	38	44	23	0.373921	0.363912	0.522233	0.609298	0.555654	0.287547	0.384011	0.177507	0.211115	0.117761	0.00141379	-1.02126	down
ENSMUSG00000039994	Timeless	260	254	251	333	298	214	145	280	212	54	1.57584	1.48445	1.41482	1.97724	1.72479	1.23071	0.785566	1.7106	1.32113	0.307899	0.0433198	-0.603115	down
NewGene_9839	NewGene_9839	80	72	58	86	41	22	7	47	39	27	2.11214	1.82571	1.39806	2.14053	0.938343	0.476961	0.138774	1.14847	1.0198	0.642923	0.00689002	-1.18994	down
ENSMUSG00000062382	Ftl1-ps1	166	313	92	183	206	333	207	222	284	466	4.69339	8.48042	2.39567	5.05365	5.54471	8.97627	5.23083	6.28449	8.25477	14.0425	0.014652	0.795421	up
ENSMUSG00000024677	Ms4a6b	74	62	20	50	102	137	158	53	68	242	0.730582	0.689623	0.17914	0.613877	0.966847	1.43208	1.46599	0.607181	0.848161	2.5626	0.0072927	1.27235	up
ENSMUSG00000117621	Hspe1-rs1	78	77	75	68	48	83	87	106	83	143	4.02502	3.80687	3.58739	3.41368	2.34428	4.06541	3.96739	5.44964	4.36216	7.14182	0.0413818	0.622574	up
ENSMUSG00000052146	Rps10	3015	3707	2594	3106	2453	3589	3041	3335	3822	7921	91.7582	110.073	73.0067	91.875	71.4956	104.349	83.893	103.762	120.012	231.45	0.0311038	0.678709	up
NewGene_4534	NewGene_4534	187	139	98	165	270	73	89	137	74	77	2.12839	1.5139	1.03148	1.8299	2.9163	0.781619	0.903222	1.55293	0.855404	0.845549	0.00209684	-0.830964	down
NewGene_19	NewGene_19	73	117	102	138	92	121	121	145	117	312	3.24603	4.98322	4.23843	6.01818	3.88911	5.15248	4.80681	6.49953	5.35636	13.5404	0.0338692	0.788817	up
ENSMUSG00000054072	Iigp1	428	696	565	484	751	426	247	335	302	151	3.72214	5.67344	4.75647	4.28975	6.47693	3.71965	2.00153	2.85908	2.98167	1.23948	2.72353e-06	-0.958133	down
ENSMUSG00000025586	Cpeb1	2063	3186	1271	1392	3337	1689	1435	1352	1406	589	18.32	27.3856	10.5612	12.2272	27.8926	14.063	11.3939	12.164	13.0469	5.11335	0.00485981	-0.732334	down
ENSMUSG00000021773	Comtd1	159	160	200	170	123	251	210	212	183	481	2.01916	1.88601	2.48311	2.06396	1.34751	2.99287	2.30162	2.57549	2.29565	5.616	0.0169805	0.826809	up
ENSMUSG00000049038	Mterf2	436	429	490	515	493	328	328	345	312	181	7.45076	7.06621	7.80248	8.61266	7.95877	5.2892	4.99235	5.8869	5.46439	3.03006	3.77035e-05	-0.621349	down
ENSMUSG00000031740	Mmp2	2308	2566	1191	2340	4399	2519	1962	1417	1413	802	20.1724	21.4272	9.67462	19.843	36.3412	20.8592	15.3037	12.4394	12.6947	6.90431	0.0284709	-0.586221	down
ENSMUSG00000040187	Arntl2	59	37	35	43	95	38	31	18	38	17	0.527794	0.550555	0.294949	0.378163	0.932886	0.325476	0.24418	0.158457	0.354683	0.250467	0.0118673	-0.853414	down
ENSMUSG00000038400	Pmepa1	942	1051	556	1171	1289	2441	594	1117	2115	1716	5.51757	5.89546	3.01765	6.69198	7.21873	13.6087	3.10464	6.57047	12.7174	9.73297	0.0156192	0.762007	up
ENSMUSG00000030630	Fah	185	286	130	212	302	738	212	130	289	574	3.09961	4.58421	2.00827	3.46389	4.81025	11.7705	3.16201	2.18196	4.9716	9.31179	0.0241719	0.918601	up
ENSMUSG00000030189	Ybx3	52916	61047	53634	57476	49597	59004	76573	72613	71426	106108	813.366	882.041	763.645	849.931	723.282	849.531	1028.28	1098.22	1126.37	1576.31	0.00806048	0.591324	up
ENSMUSG00000104346	Pcdhga3	36	49	18	11	70	197	111	15	109	16	0.198017	0.261658	0.092214	0.055614	0.374022	1.05243	0.558481	0.080199	0.628911	0.082964	0.0379357	1.31332	up
ENSMUSG00000040229	Gpr34	44	60	7	34	64	96	83	59	79	57	0.555759	0.740215	0.075466	0.415395	0.766538	1.19375	0.932748	0.752946	1.03104	0.691303	0.0160457	0.940089	up
ENSMUSG00000057841	Rpl32	5449	6596	5830	5858	4950	6487	6243	5900	6759	17412	278.06	321.413	277.539	293.038	240.041	314.611	283.704	301.709	354.027	850.616	0.0387567	0.722675	up
ENSMUSG00000015312	Gadd45b	1853	1890	1648	1078	1375	2793	2103	3348	2664	1112	38.3823	37.4829	31.6284	21.8388	27.0275	55.1895	39.0336	69.62	56.6282	22.3631	0.011263	0.630522	up
ENSMUSG00000049303	Syt12	66	79	47	64	75	255	106	58	163	269	0.489417	0.556492	0.323252	0.460117	0.525749	1.79754	0.701395	0.430741	1.24076	1.92741	0.000156511	1.4751	up
ENSMUSG00000031951	Tmem231	76	71	36	90	102	54	45	57	53	26	0.67655	0.602063	0.291728	0.773967	0.857889	0.455058	0.35597	0.500544	0.478589	0.21848	0.0235206	-0.603771	down
ENSMUSG00000028339	Col15a1	943	894	526	1086	1982	1006	552	773	619	178	4.85516	4.48838	2.60032	5.47901	9.67624	4.92583	2.54477	3.99114	3.26251	0.878066	0.0294118	-0.738392	down
ENSMUSG00000009927	Rps25	7635	9712	8434	8678	7620	9852	9649	8336	9933	24449	269.488	269.998	289.967	237.341	203.476	344.162	319.739	318.196	385.118	775.484	0.034569	0.707103	up
ENSMUSG00000055653	Gpc3	254	308	302	394	559	311	217	188	275	118	3.05661	3.53776	3.35897	4.60876	6.39313	3.55153	2.3194	2.26593	3.39093	1.36894	0.00253121	-0.656243	down
ENSMUSG00000033295	Ptprf	111	77	96	131	117	208	241	143	118	194	0.38468	0.255569	0.307588	0.443307	0.38537	0.684919	0.747409	0.49533	0.418485	0.650116	0.000913143	0.839446	up
NewGene_1725	NewGene_1725	96	169	114	129	112	60	88	97	52	52	2.29067	3.80446	2.47331	2.71418	2.26248	1.42112	1.54284	2.52656	1.34539	1.23174	0.00223801	-0.762753	down
NewGene_3650	NewGene_3650	61	71	58	86	89	36	55	38	53	39	1.15152	1.36919	1.01919	1.71169	1.59547	0.646475	0.828567	0.626612	1.01774	1.28819	0.0035955	-0.64527	down
NewGene_9713	NewGene_9713	141	184	89	107	117	66	52	80	56	60	1.25731	1.74814	0.80787	0.937911	1.05304	0.972005	0.415907	0.669514	0.505994	0.434239	8.38858e-05	-0.94751	down
ENSMUSG00000054477	Kcnn2	70	64	83	107	91	68	43	57	49	30	0.50214	0.611902	0.877868	0.748786	0.633039	0.715979	0.27361	0.682467	0.357027	0.204708	0.00289569	-0.70638	down
ENSMUSG00000046387	Pcdhb17	107	98	70	100	129	77	61	93	50	11	0.60716	0.531042	0.369416	0.55266	0.69444	0.413018	0.307446	0.528723	0.28729	0.060779	0.0416952	-0.756621	down
ENSMUSG00000029373	Pf4	200	264	60	213	248	342	291	224	269	291	9.02491	11.3842	2.49322	9.34581	10.7196	14.6734	11.7265	10.1423	12.4761	12.7159	0.028298	0.633741	up
ENSMUSG00000030732	Chrdl2	72	101	83	71	81	55	25	34	54	28	1.25372	1.68743	1.3725	1.20418	1.33207	0.914324	0.378005	0.586409	0.98551	0.467871	7.30186e-05	-1.0143	down
NewGene_10507	NewGene_10507	34	39	49	50	29	39	78	48	66	106	0.945544	1.01555	1.80715	1.33304	0.751969	1.01251	1.92228	1.31699	1.89303	3.84731	0.02711	0.845565	up
NewGene_7365	NewGene_7365	137	188	184	212	177	243	172	250	277	375	4.70242	6.22518	5.87415	7.12667	5.8087	7.98488	5.28974	8.64641	9.80436	12.5522	0.0126638	0.655585	up
ENSMUSG00000032012	Nectin1	101	174	80	110	205	113	97	70	75	53	0.473198	0.782982	0.345595	0.500991	0.914779	0.502705	0.405325	0.326289	0.360194	0.237304	0.00893504	-0.634781	down
NewGene_789	NewGene_789	68	123	84	70	88	48	18	41	29	38	0.901461	1.6543	1.06231	1.04369	1.18382	0.610911	0.210088	0.579101	0.396577	0.488999	3.03552e-05	-1.24175	down
ENSMUSG00000006542	Prkag3	1857	2962	1327	2051	1757	1032	983	1524	1383	1043	17.7805	27.4514	11.6138	18.8157	16.3555	9.34223	8.26235	14.4306	13.4695	9.58679	0.00148227	-0.657548	down
ENSMUSG00000018326	Ywhab	2867	3487	2326	3412	4065	6888	2337	2626	4290	6736	25.2956	29.4917	19.023	29.3777	34.1625	57.9562	18.4147	23.2197	38.856	57.6346	0.0431566	0.615904	up
ENSMUSG00000071036	Gm10309	23	42	65	17	27	114	134	98	129	435	0.293847	0.521218	0.798933	0.207582	0.328665	1.43653	1.57727	1.29159	1.74479	5.57984	2.75136e-06	2.52586	up
NewGene_10044	NewGene_10044	2104	2808	1085	1720	1684	2765	2478	3622	1282	4753	24.9255	40.1113	13.8709	21.9128	23.6784	38.7179	31.9917	54.0708	17.123	53.3465	0.021204	0.801264	up
ENSMUSG00000005514	Por	1067	1504	845	1403	1880	3418	1043	925	2038	3054	10.7966	14.6265	7.95734	13.8334	18.423	33.1619	9.45353	9.3478	21.2781	29.9496	0.0269012	0.767023	up
ENSMUSG00000026621	Mtarc1	28	19	27	41	44	76	56	25	33	256	0.34179	0.23249	0.293734	0.483571	0.53776	0.942602	0.645032	0.323482	0.430821	3.22405	0.00537382	1.7088	up
ENSMUSG00000034271	Jdp2	269	322	312	311	329	207	224	181	221	122	4.34263	4.97685	4.66959	4.8827	5.05587	3.17296	3.21642	2.9249	3.66188	1.88866	4.50145e-06	-0.644669	down
ENSMUSG00000078963	Hsbp1l1	60	51	92	85	92	35	63	42	40	50	1.26877	1.0289	1.99654	1.75916	1.83793	0.699539	1.30944	0.892298	0.927008	1.01346	0.0277056	-0.647648	down
ENSMUSG00000020857	Nme2	7314	8558	7722	8371	6615	8290	9308	8687	9355	17921	230.998	250.569	225.722	249.501	185.579	234.452	270.331	264.473	290.281	542.223	0.0353149	0.592915	up
ENSMUSG00000031824	6430548M08Rik	537	787	610	361	535	832	1088	947	667	752	2.56521	3.62851	2.6978	1.68826	2.43633	3.83691	4.64062	4.59058	3.27088	3.49835	0.00303321	0.660452	up
ENSMUSG00000035258	Abi3bp	1014	1159	398	874	1713	870	693	769	373	163	6.37058	6.62516	2.06368	5.11437	9.14147	4.8816	3.61236	4.37345	2.51104	0.807396	0.0322294	-0.784635	down
ENSMUSG00000043487	Acot6	191	204	192	226	261	163	124	133	130	55	1.4905	1.52687	1.38705	1.72641	1.9348	1.20934	0.856904	1.03391	1.04072	0.40621	3.40178e-05	-0.788383	down
NewGene_9452	NewGene_9452	56	83	53	49	58	86	76	50	112	105	1.40497	1.99314	1.24344	1.2062	1.39135	2.05198	1.70948	1.26835	2.89748	2.5634	0.0337532	0.607669	up
ENSMUSG00000027947	Il6ra	296	317	224	309	334	693	515	236	542	446	0.922781	0.951441	0.635	0.926095	0.992404	2.068	1.42108	0.743575	1.74411	1.32833	0.000556379	0.780501	up
ENSMUSG00000041187	Prkd2	493	415	647	573	726	399	338	322	322	225	3.60861	3.0285	4.3889	4.2287	5.30848	2.99242	2.32246	2.46928	2.61046	1.59109	4.3986e-06	-0.784727	down
NewGene_6033	NewGene_6033	7	16	4	10	36	71	89	54	87	65	0.065189	0.148424	0.038167	0.100456	0.349526	0.688573	0.813761	0.547919	0.934955	0.646877	9.07577e-09	2.46648	up
ENSMUSG00000023905	Tnfrsf12a	1050	1127	1381	700	1247	2006	2720	1130	961	1367	28.4193	29.2132	34.7509	18.4367	32.03	51.7161	66.3654	30.6387	26.7186	35.792	0.0316115	0.617226	up
ENSMUSG00000049184	Purg	38	68	63	100	109	59	50	49	50	20	0.618173	1.06106	0.87934	1.45455	1.57999	0.879746	0.677979	0.78791	0.775364	0.280185	0.0261663	-0.670414	down
ENSMUSG00000020334	Slc22a4	117	142	96	92	139	388	147	104	133	215	1.36733	1.59359	1.03995	1.04391	1.54944	4.33494	1.53569	1.22457	1.6024	2.4426	0.0115248	0.817446	up
ENSMUSG00000071454	Dtnb	52	94	61	50	69	101	112	97	73	144	0.471492	0.91715	0.552889	0.450573	0.62324	1.2504	1.12527	0.903643	0.756795	1.86434	0.00528099	0.800807	up
NewGene_2087	NewGene_2087	411	502	446	336	402	687	639	394	499	1401	15.3873	17.999	15.5002	12.2628	14.296	24.5043	21.3836	14.7809	19.1752	50.8588	0.00950525	0.921519	up
ENSMUSG00000051790	Nlgn2	187	192	125	152	236	147	150	112	127	40	0.888925	0.875925	0.549161	0.708031	1.19019	0.666731	0.637771	0.531749	0.619695	0.184972	0.0233525	-0.589925	down
ENSMUSG00000000317	Bcl6b	252	394	267	514	474	232	152	325	218	48	1.98853	2.98041	1.95424	3.95526	3.55702	1.7431	1.0661	2.56779	1.76369	0.359832	0.00825937	-0.920239	down
ENSMUSG00000038216	Pnmt	81	40	114	40	60	557	699	604	647	595	1.86568	0.866005	2.42849	0.896618	1.29924	12.2086	14.3723	13.94	15.2921	13.2635	5.36519e-25	3.23799	up
ENSMUSG00000059013	Sh2d3c	987	604	1111	934	956	656	753	512	582	353	8.44243	4.94677	8.81049	7.79336	7.76851	5.34104	5.75483	4.38526	5.1122	2.91962	0.00230628	-0.663803	down
ENSMUSG00000022840	Adcy5	192	237	156	177	339	707	226	141	420	269	0.727206	0.858123	0.545989	0.654128	1.21852	2.54987	0.764414	0.534345	1.63391	0.987196	0.0294379	0.735741	up
ENSMUSG00000022847	Thpo	154	262	199	196	183	138	136	128	94	124	2.2986	4.09362	2.85441	2.18199	2.84824	1.85867	1.97577	1.90481	1.26228	1.63307	0.00215291	-0.610361	down
ENSMUSG00000027318	Adam33	128	113	45	122	172	88	64	66	98	47	1.18886	1.0144	0.346531	1.26084	1.70061	0.768464	0.488437	0.667177	0.911188	0.396376	0.0346355	-0.59767	down
ENSMUSG00000027313	Chac1	9400	6599	9643	5221	6201	8554	15636	6648	14352	12733	152.652	102.653	145.181	82.7459	95.6793	132.214	226.835	108.212	239.263	200.265	0.0205647	0.693901	up
ENSMUSG00000047409	Ctdspl	430	509	287	429	561	1135	315	428	632	650	2.48943	2.82423	1.53683	2.4251	3.08265	6.25558	1.62512	2.47975	3.75719	3.64211	0.0373845	0.587521	up
ENSMUSG00000021815	Mss51	1168	1041	1057	1251	1391	2572	1582	1497	1448	1758	16.9954	14.5175	14.259	17.7681	19.2415	35.6346	20.5658	21.8391	21.6413	24.7786	7.73696e-05	0.650172	up
ENSMUSG00000076441	Ass1	58	53	66	78	75	81	80	147	62	139	0.908748	0.789673	0.951275	1.18585	1.10829	1.19888	1.11664	2.29874	0.99374	2.09857	0.0235977	0.732743	up
ENSMUSG00000011179	Odc1	10354	15478	11887	7469	14352	20291	23507	19412	18784	43315	129.414	184.763	138.566	90.8274	169.537	240.946	263.357	243.614	240.978	526.07	8.66097e-05	1.21451	up
ENSMUSG00000025902	Sox17	789	804	1009	654	661	545	571	542	543	292	7.93271	8.17737	9.19998	6.11905	6.43319	4.87415	5.19106	5.34998	5.50978	3.48199	0.00212358	-0.6361	down
ENSMUSG00000073878	Gm13304	146	222	54	162	236	63	89	58	84	46	4.63371	6.74162	1.58546	5.01777	7.09342	1.90248	2.50509	1.82223	2.70957	1.40397	0.000172616	-1.17042	down
ENSMUSG00000048087	Gm4737	173	220	172	149	224	277	232	177	183	972	2.1916	2.67336	2.01879	1.83787	2.69755	3.34382	2.63232	2.25098	2.37432	11.9494	0.0145585	1.17811	up
ENSMUSG00000040564	Apoc1	44	59	7	106	92	415	64	90	123	418	2.49088	3.25801	0.291558	5.62006	4.3595	23.4362	3.19855	4.45967	7.61407	22.6508	0.00642766	2.02683	up
ENSMUSG00000026043	Col3a1	7703	7364	3735	6452	14457	6060	2644	2758	2599	1164	36.8037	33.7068	16.541	30.0843	65.634	27.5542	11.2835	13.2059	12.7472	5.38405	5.03687e-05	-1.33113	down
NewGene_4213	NewGene_4213	56	45	33	37	34	75	165	46	35	104	0.90775	0.802084	0.502511	0.572121	0.456905	1.14648	2.34031	0.731872	0.569535	1.59194	0.00855071	1.13583	up
ENSMUSG00000031530	Dusp4	47	72	28	53	65	130	85	90	72	58	0.453334	0.668616	0.243827	0.494016	0.595383	1.19512	0.733561	0.873603	0.71046	0.536702	0.001607	0.781709	up
ENSMUSG00000029661	Col1a2	4825	5537	2346	4132	10069	4746	3263	2866	2400	1616	23.9866	26.3636	10.8093	20.0434	47.5593	22.4536	14.49	14.278	12.2442	7.7734	0.00671919	-0.7702	down
ENSMUSG00000043298	Smco3	32	50	82	55	48	22	28	34	37	15	0.41245	0.617958	0.979429	0.68201	0.579086	0.25893	0.316422	0.430421	0.483188	0.175328	0.00762164	-0.946829	down
ENSMUSG00000056880	Gadl1	211	305	194	220	176	275	236	397	233	481	2.13665	2.88961	1.98993	2.25176	1.75747	2.64645	2.21744	3.78507	2.9237	5.34428	0.0248525	0.664482	up
ENSMUSG00000025792	Slc25a10	207	324	143	337	409	1053	187	129	676	691	2.71563	4.07515	1.73054	4.31256	5.09963	13.1672	2.19032	1.69189	9.11821	8.79052	0.0232169	1.05199	up
ENSMUSG00000047963	Stbd1	933	1504	860	1081	930	1309	1670	2008	1098	1853	12.5816	19.3886	10.6712	14.24	11.8585	16.8104	20.1439	27.0507	15.0963	24.1367	0.00383647	0.680918	up
NewGene_4608	NewGene_4608	246	359	292	203	216	429	397	245	382	737	6.96533	9.67819	8.00724	7.13339	6.61316	13.3798	12.4526	7.98876	13.0322	28.1373	0.010469	0.844135	up
ENSMUSG00000021203	Otub2	459	614	226	459	455	276	283	251	257	137	3.77733	5.5606	1.92493	3.68718	3.99642	2.40871	2.31781	2.06455	2.17103	1.09087	0.000190262	-0.817359	down
ENSMUSG00000054675	Tmem119	142	177	58	98	112	83	66	77	79	37	1.67687	2.00375	0.631077	1.12625	1.25741	0.935125	0.698911	0.909401	0.952021	0.416886	0.0104544	-0.726238	down
ENSMUSG00000031112	Stk26	183	280	66	116	248	228	171	325	289	264	1.33078	1.95384	0.440734	0.823994	1.71798	1.58083	1.10985	2.37872	2.16558	1.86645	0.0494827	0.639367	up
ENSMUSG00000039328	Rnf122	234	215	239	277	315	190	167	145	196	78	2.95517	2.79723	2.77542	3.69559	4.1162	2.17054	1.70272	2.23053	2.6163	0.996096	0.000257745	-0.682337	down
ENSMUSG00000029752	Asns	103	218	94	140	249	533	81	118	243	496	1.3626	2.77235	1.15559	1.81184	3.13786	6.72975	0.952041	1.55958	3.30916	6.37695	0.0318519	1.01916	up
ENSMUSG00000034892	Rps29	1974	1825	2118	2064	1145	2369	2471	2226	2361	4888	134.525	119.171	133.829	137.275	74.114	153.668	150.444	152.064	165.196	322.697	0.0201294	0.749089	up
ENSMUSG00000040606	Kazn	90	143	92	161	155	96	85	42	106	29	0.552192	0.87879	0.516145	0.91857	0.883627	0.594192	0.452314	0.226016	0.670561	0.193094	0.00844798	-0.796658	down
ENSMUSG00000026365	Cfh	877	1456	493	768	1273	1626	1745	1022	1099	1708	5.36973	8.48958	2.95208	4.56422	7.40772	9.55215	9.51802	6.23432	6.86765	10.0757	0.00921393	0.687252	up
ENSMUSG00000020241	Col6a2	2041	1948	888	1708	3801	1872	1302	1302	1319	590	13.3981	12.3069	5.41317	10.8858	23.8424	11.6629	7.54226	8.53808	8.89495	3.75209	0.0266901	-0.626839	down
ENSMUSG00000104063	Pcdhgb7	433	30	414	56	34	47	24	141	19	14	2.43916	0.15834	2.16384	0.305649	0.178427	0.247109	0.116578	0.79315	0.106122	0.074482	0.0338832	-2.07439	down
ENSMUSG00000062328	Rpl17	1334	1709	1434	1444	1482	2736	1722	1563	2220	3960	26.7457	32.8104	26.6522	28.2476	28.2143	52.2008	30.8398	31.4004	45.6852	76.8945	0.00276738	0.834984	up
ENSMUSG00000042834	Nrep	2801	3609	1706	2597	4127	1524	1048	1583	1206	784	33.7344	41.8901	19.0662	29.8091	47.7619	17.3484	11.1102	19.0891	14.8604	8.91287	3.82326e-10	-1.19619	down
ENSMUSG00000064202	Spata6l	60	68	109	81	79	149	113	102	110	143	0.800097	0.803458	1.29375	1.04879	0.968061	1.8583	1.47147	1.587	1.83096	1.79533	0.00639835	0.697784	up
ENSMUSG00000020460	Rps27a	2059	2341	2476	2055	1371	2766	2496	2517	3364	8832	85.9203	76.1312	86.5628	67.3908	44.3602	109.839	74.9296	98.6814	126.975	331.109	0.0262356	1.09588	up
ENSMUSG00000001627	Ifrd1	3217	4043	3935	3945	4590	6754	7619	4362	4876	4929	26.3937	31.2545	29.9641	30.4561	34.559	50.7843	53.7116	34.5667	40.9347	37.7832	0.00014878	0.59665	up
ENSMUSG00000078765	U2af1l4	180	219	364	216	222	310	396	389	280	529	6.96824	7.65655	12.8911	8.42372	7.87662	10.5196	14.2004	13.8667	9.8632	18.282	0.0131614	0.745615	up
ENSMUSG00000048126	Col6a3	1690	1620	759	1732	2740	1499	886	1178	1022	455	4.99138	4.58134	2.0743	4.99165	7.68646	4.21298	2.33569	3.4876	3.0979	1.30084	0.00950752	-0.696331	down
ENSMUSG00000021185	Dglucy	592	614	442	939	840	473	425	392	518	332	4.91883	4.90429	3.72185	7.48169	6.76128	3.89775	3.07095	3.18152	4.54435	2.63592	0.000314998	-0.604717	down
ENSMUSG00000052373	Mpp3	533	826	612	584	803	349	449	376	403	249	4.72542	7.22018	5.03221	5.26035	6.92501	3.0604	3.6856	3.47969	3.66115	2.19502	3.10917e-08	-0.813695	down
ENSMUSG00000002769	Gnmt	66	28	103	116	53	156	599	220	315	283	1.6709	0.677018	2.45275	2.88859	1.28127	3.81254	13.7305	5.66395	8.29867	7.02451	8.50212e-07	2.14504	up
NewGene_7153	NewGene_7153	33	45	10	16	18	53	131	78	32	150	0.718687	0.796448	0.160955	0.279699	0.3176	1.14983	2.52488	1.54019	0.601069	2.87872	0.000121841	2.01137	up
ENSMUSG00000110353	Gm33543	109	317	24	177	239	29	17	21	16	44	1.67539	4.68326	0.334632	2.65313	3.49985	0.415338	0.224342	0.324274	0.251367	0.654619	8.71173e-07	-2.58323	down
ENSMUSG00000027875	Hmgcs2	237	386	296	208	408	1057	305	251	423	924	1.91333	2.98377	2.21429	1.63436	3.12903	8.12381	2.19595	2.02597	3.50241	7.22521	0.0067558	1.05627	up
ENSMUSG00000031250	Tnmd	120	279	68	44	162	78	41	55	24	105	2.35096	5.23336	1.22049	0.831298	3.01339	1.44608	0.711124	1.07347	0.472015	1.99058	0.0479777	-0.992088	down
ENSMUSG00000027469	Tpx2	257	235	67	244	413	408	334	927	661	388	1.56	1.36771	0.373302	1.44812	2.38747	2.36429	1.90397	5.97328	4.67393	2.28719	0.000532661	1.27626	up
ENSMUSG00000024843	Chka	196	166	234	164	155	128	127	94	118	85	2.15889	1.75812	2.42463	1.66626	1.63534	1.3875	1.154	1.09455	1.26505	0.897797	0.0012097	-0.70183	down
ENSMUSG00000030862	Cpxm2	223	500	166	248	465	208	170	174	222	143	1.92839	3.63945	1.16713	2.19284	3.35581	1.53064	1.30929	1.32228	1.73001	1.04591	0.00457206	-0.704495	down
ENSMUSG00000008683	Rps15a	4426	5462	4235	4666	3998	5492	4761	4984	5933	14292	23.8661	26.9558	21.1815	24.3679	19.5394	27.3463	22.2404	26.4257	31.7333	71.4447	0.0230776	0.786038	up
ENSMUSG00000002489	Tiam1	315	446	119	208	415	135	103	218	195	66	1.98588	2.70803	0.430677	0.821761	2.30067	0.491887	0.339292	0.858508	0.881406	0.230976	0.00408917	-0.989302	down
ENSMUSG00000030086	Chchd6	129	195	93	171	224	356	121	152	211	413	3.05489	4.42819	2.02101	3.96278	5.03219	8.06639	2.5508	3.63061	5.1274	9.5826	0.0334869	0.769256	up
ENSMUSG00000030088	Aldh1l1	298	385	391	388	555	826	431	261	520	1050	1.89332	2.78348	2.30817	2.40672	3.9465	6.72438	3.31825	1.66572	4.49943	6.47192	0.0320606	0.743658	up
ENSMUSG00000030336	Cd27	46	45	65	44	71	99	114	70	50	76	0.769501	0.719679	1.01993	0.728464	1.13488	1.60453	1.72715	1.18358	0.874738	1.25179	0.0193022	0.658006	up
ENSMUSG00000026971	Itgb6	1065	1143	773	1063	1406	432	308	712	851	104	5.91928	6.10573	3.97298	5.85575	7.45389	2.2853	1.5176	3.94468	4.84355	0.555001	0.00207585	-1.14335	down
NewGene_3633	NewGene_3633	285	340	266	335	285	395	367	339	344	651	6.40374	7.22115	5.80558	7.44107	6.12474	8.37644	7.38063	7.77553	7.83876	14.3307	0.0236926	0.586906	up
NewGene_2056	NewGene_2056	18213	23478	9231	16627	27957	10565	8796	8201	10373	5819	155.918	191.832	73.269	138.734	226.977	85.7935	67.4821	70.2378	90.831	48.1887	1.95229e-07	-1.04324	down
ENSMUSG00000113255	Tes3-ps	37	31	27	27	37	52	63	51	34	62	0.294605	0.234366	0.198609	0.208697	0.280531	0.39696	0.451536	0.413265	0.276036	0.480024	0.00506319	0.807979	up
NewGene_1575	NewGene_1575	331	499	254	330	360	156	109	357	211	83	4.76116	6.77069	3.57774	4.76274	5.19996	1.94466	1.42884	5.72737	3.27946	1.23346	0.00599339	-0.897429	down
ENSMUSG00000028080	Lrba	1125	894	1056	1101	1509	1553	1650	1690	2256	1672	3.02292	2.30129	2.63114	2.89067	3.85682	3.97196	3.96203	4.55353	6.2248	4.35164	1.12882e-05	0.712647	up
ENSMUSG00000032854	Ugt8a	63	69	132	137	83	68	50	42	86	6	0.439453	0.458301	0.861482	0.9479	0.556027	0.45486	0.315934	0.296438	0.622223	0.040107	0.041876	-0.96714	down
ENSMUSG00000004698	Hdac9	265	239	46	48	282	55	151	61	50	80	1.4863	1.29917	0.140347	0.154313	1.51943	0.174505	0.747281	0.205754	0.171086	0.424338	0.0462105	-1.02047	down
ENSMUSG00000023064	Sncg	416	414	365	496	307	1118	380	420	1061	260	12.9551	12.3598	10.5471	15.1016	9.09768	33.1981	10.5877	13.1083	33.9748	7.84251	0.0404269	0.687887	up
ENSMUSG00000027004	Frzb	147	163	344	266	183	147	180	140	136	43	1.23877	1.31155	2.69007	2.18497	1.46474	1.17901	1.35727	1.17725	1.1787	0.34876	0.0250818	-0.782194	down
NewGene_8476	NewGene_8476	80	82	32	33	77	45	22	44	29	27	1.34943	1.31766	0.486671	0.528948	1.226	0.721317	0.32178	0.730285	0.490624	0.439762	0.02434	-0.789907	down
ENSMUSG00000055116	Arntl	573	703	812	561	1119	486	799	303	396	350	5.23154	6.15101	7.72396	5.37536	10.7917	4.63453	7.14188	3.1516	3.7677	3.09361	0.0170707	-0.622849	down
ENSMUSG00000039481	Nrtn	74	56	61	62	69	110	127	171	114	226	1.9173	1.37921	1.46739	1.57022	1.70085	2.70089	2.93268	4.45099	3.03033	5.67449	1.31658e-05	1.32822	up
ENSMUSG00000025959	Klf7	520	514	464	612	867	419	361	522	325	176	1.80391	1.70581	1.4896	2.08334	2.85563	1.38114	1.11748	1.8112	1.17387	0.589813	0.00216082	-0.664316	down
ENSMUSG00000029650	Slc46a3	218	329	203	391	312	237	173	178	167	144	2.51035	3.4925	2.20639	4.32026	3.27968	2.48758	1.74342	2.00525	1.92593	1.64982	0.00037153	-0.622872	down
ENSMUSG00000026193	Fn1	4462	2822	1260	2978	5188	2576	2647	2130	1631	815	14.9649	9.04053	3.87033	9.71523	15.983	8.216	7.62363	6.92145	5.45097	2.61205	0.024771	-0.711189	down
ENSMUSG00000003153	Slc2a3	341	418	209	246	531	611	384	529	643	404	2.31679	2.82029	1.32362	1.6499	3.50916	4.02512	2.29928	3.55952	4.57622	3.09739	0.00226736	0.645695	up
ENSMUSG00000042515	Pwwp3b	91	167	77	155	212	93	50	120	73	46	0.525417	0.92442	0.411776	0.873347	1.16248	0.508174	0.257419	0.689569	0.431177	0.25319	0.00789239	-0.789701	down
ENSMUSG00000078566	Bnip3	14990	16483	20449	15538	16311	23967	24872	16405	23115	32999	227.051	239.072	287.16	229.632	234.68	345.372	336.441	248.983	359.263	483.931	0.00901002	0.618669	up
NewGene_7586	NewGene_7586	1321	998	305	1014	729	383	606	247	263	304	17.7709	12.8645	3.79528	13.3099	9.3178	4.90284	7.27826	3.32111	3.63352	3.95035	0.000463319	-1.2074	down
ENSMUSG00000013236	Ptprs	393	464	247	376	532	226	225	354	282	96	1.52218	2.17339	1.0744	1.72446	1.97156	0.831583	0.954168	1.65758	1.12063	0.35931	0.00620773	-0.705572	down
ENSMUSG00000062488	Ifit3b	100	173	89	185	163	99	50	91	86	32	1.32367	2.19333	1.09018	2.38962	2.05492	1.2496	0.589873	1.19985	1.16416	0.40765	0.000887904	-0.934298	down
ENSMUSG00000033579	Fa2h	73	66	132	76	89	52	74	36	77	11	0.776057	0.671452	1.30446	0.790162	0.894201	0.522495	0.703639	0.380282	0.835047	0.112347	0.0496409	-0.814741	down
NewGene_9055	NewGene_9055	451	480	556	350	390	802	882	486	606	1374	23.1817	23.5992	26.4897	17.5335	19.0266	39.213	40.4962	25.0039	31.9784	68.4182	0.0019539	0.997687	up
NewGene_10100	NewGene_10100	256	158	129	125	234	954	182	158	345	1956	2.07776	1.22772	0.970555	0.987053	1.80177	7.37225	1.31981	1.2815	2.87132	15.3788	0.00314863	2.18838	up
ENSMUSG00000028312	Smc2	76	72	75	64	123	56	58	53	71	19	0.372202	0.336967	0.338958	0.30458	0.571315	0.261077	0.250704	0.258277	0.355445	0.086431	0.0259716	-0.627288	down
ENSMUSG00000074215	Gm10643	41	32	26	19	63	85	54	66	59	77	0.68875	0.516253	0.393428	0.300118	0.994312	1.35545	0.80087	1.11071	1.01415	1.24381	0.00129931	1.01512	up
ENSMUSG00000040010	Slc7a5	71	106	118	102	107	85	109	36	46	26	0.531504	0.766159	0.820494	0.751476	0.766895	0.606666	0.735165	0.272418	0.356669	0.187323	0.0377478	-0.717505	down
NewGene_8656	NewGene_8656	25	31	18	23	46	51	70	80	47	108	0.391268	0.432176	0.226767	0.413318	0.727823	0.830245	1.03442	1.33716	0.753999	1.85393	5.36896e-05	1.46532	up
ENSMUSG00000049281	Scn3b	52	32	78	41	40	119	92	116	106	32	0.330146	0.196258	0.460029	0.253349	0.237919	0.720822	0.523699	0.741909	0.713639	0.198333	0.0129397	0.915636	up
ENSMUSG00000038594	Cep85l	3276	4765	2585	2122	3192	6126	6398	5115	5402	6522	11.7298	16.3412	8.57748	7.41464	10.8564	20.8727	20.4622	18.3557	19.8561	22.6158	3.04201e-06	0.97949	up
ENSMUSG00000045777	Ifitm10	124	107	47	87	82	132	122	113	103	196	2.7496	2.24375	0.991395	1.94429	1.78819	2.92276	2.43368	2.57413	2.40082	4.2142	0.0294638	0.68699	up
ENSMUSG00000015709	Arnt2	72	84	42	68	106	28	38	66	32	9	0.306366	0.34042	0.165418	0.279197	0.429749	0.111778	0.14343	0.278392	0.139003	0.034755	0.00800661	-1.03781	down
ENSMUSG00000039252	Lgi2	226	354	77	273	394	229	95	211	130	62	0.931184	1.43533	0.29215	1.09726	1.58269	0.893467	0.346654	0.892655	0.545434	0.245012	0.0341426	-0.790747	down
NewGene_6900	NewGene_6900	4605	6324	7086	4892	3774	5299	11063	7587	5155	10677	54.8417	72.1686	78.3222	56.956	42.6561	60.081	117.714	90.6658	63.0336	123.176	0.0345853	0.658946	up
ENSMUSG00000042846	Lrrtm3	38	53	11	34	45	53	56	52	40	77	0.253767	0.341231	0.067141	0.223068	0.291339	0.341694	0.336241	0.35013	0.276284	0.504653	0.043855	0.754351	up
ENSMUSG00000032271	Nnmt	135	178	65	199	172	652	89	90	599	1191	3.49749	4.41951	1.61333	4.99555	4.21274	16.297	2.0206	2.44065	15.8991	30.0644	0.00663717	1.99236	up
NewGene_3476	NewGene_3476	97	93	86	69	77	97	105	112	104	207	1.68639	1.54176	1.38481	1.16731	1.25718	1.60347	1.61886	1.94605	1.84091	3.48536	0.0346536	0.678585	up
ENSMUSG00000000223	Drp2	383	379	627	479	563	374	395	320	186	82	1.42571	1.42527	2.16369	1.74107	2.05482	1.32343	1.3141	1.24131	1.21774	0.293123	0.0104225	-0.83659	down
ENSMUSG00000041736	Tspo	1161	1395	705	1320	1177	2863	948	1015	1969	2489	36.8711	42.4217	20.7831	40.8986	35.4845	86.5545	26.8784	32.2994	64.2088	76.5604	0.0113605	0.786053	up
ENSMUSG00000094686	Ccl21a	231	511	217	412	369	130	190	161	196	101	7.0338	14.9524	6.12269	12.2611	10.7127	3.75875	5.1774	4.91349	6.11784	2.97748	5.16513e-06	-1.08168	down
NewGene_4070	NewGene_4070	170	157	140	209	235	82	118	96	115	68	1.05562	0.932239	0.806831	1.26611	1.38931	0.484961	0.654768	0.598659	0.735643	0.405908	2.84144e-06	-0.856058	down
ENSMUSG00000096596	Gm10591	211	373	179	257	334	95	131	86	143	71	6.43617	10.9312	5.06416	7.65109	9.68921	2.73902	3.55999	2.62884	4.48515	2.09334	3.14248e-09	-1.28531	down
ENSMUSG00000037762	Slc16a9	312	430	271	367	653	287	326	147	255	175	2.20629	2.90899	1.77705	2.53453	4.38726	1.9305	2.05842	1.04002	1.85218	1.19354	0.00259935	-0.686151	down
NewGene_4032	NewGene_4032	543	502	339	328	552	815	876	1128	527	937	2.21853	2.01828	1.22756	1.25433	2.03294	3.02308	3.17567	4.33752	2.11707	3.69893	2.42537e-05	1.01627	up
ENSMUSG00000003477	Inmt	1093	2433	882	1772	2650	3208	3536	1717	3522	4014	26.9717	57.5104	20.1784	42.6776	62.1407	75.3598	77.966	42.4836	89.2259	95.9435	0.000626375	0.999438	up
NewGene_1209	NewGene_1209	79	88	20	90	109	125	96	192	136	139	0.80521	0.976428	0.183735	0.824878	0.998109	1.43627	0.954111	1.84433	1.49003	1.26366	0.00545082	0.955809	up
ENSMUSG00000042485	Mustn1	2275	1655	2099	2216	1951	2930	3347	1939	2288	4935	48.9313	34.0819	41.8463	46.5118	39.8615	59.9626	64.2988	41.7896	50.5088	102.787	0.0155963	0.703004	up
ENSMUSG00000074874	Ctla2b	268	287	539	382	318	267	227	184	241	178	6.65833	7.65143	12.2964	9.11999	7.35013	5.78756	5.03633	4.77789	6.37753	4.40334	0.00463948	-0.686082	down
ENSMUSG00000038515	Grtp1	166	140	137	191	196	133	96	97	100	62	1.80373	1.25078	1.26917	1.95354	1.7383	1.21426	0.977089	0.9288	1.15689	0.528651	2.36559e-05	-0.716159	down
ENSMUSG00000031490	Eif4ebp1	3531	3677	3982	2803	3111	5535	5632	3580	4447	8571	47.0093	46.8931	49.1364	36.4135	39.347	70.1227	66.9771	47.7698	60.7626	110.499	0.00427836	0.794491	up
ENSMUSG00000031146	Plp2	1161	1361	1145	1059	1156	1753	1547	1652	1554	2287	26.6711	29.9545	24.376	23.7427	25.2203	38.3151	31.7516	38.043	36.6464	50.8816	0.000636362	0.672752	up
ENSMUSG00000114133	Gm20075	188	234	172	220	166	289	275	231	248	360	2.31223	2.75082	1.96131	2.63027	1.93998	3.37809	3.01975	2.8421	3.1289	4.27925	0.00552654	0.606867	up
ENSMUSG00000034258	Flvcr2	28	46	29	18	37	65	22	65	61	35	0.211301	0.337845	0.203965	0.129776	0.270822	0.472777	0.148693	0.503357	0.478414	0.259006	0.0470439	0.707186	up
ENSMUSG00000079363	Gbp4	361	677	371	413	577	340	263	403	320	113	2.10818	3.89579	2.00783	2.36486	3.25051	1.88868	1.37198	2.36453	1.91321	0.638503	0.00659636	-0.687738	down
ENSMUSG00000059824	Dbp	1784	2703	744	2168	890	3657	1907	5299	3827	1654	26.2857	37.7316	10.1503	31.6904	12.4197	51.3866	25.276	79.6643	57.709	23.7	0.0048091	1.02296	up
NewGene_2188	NewGene_2188	30	120	30	44	101	263	25	34	156	191	0.298746	1.1317	0.253877	0.395687	0.958019	2.77729	0.217506	0.329418	1.57965	1.95374	0.0468065	1.17885	up
ENSMUSG00000020834	Dhrs13	50	59	40	67	42	24	32	31	29	31	0.728133	0.834055	0.547517	0.962036	0.591913	0.334539	0.421851	0.450421	0.427288	0.433401	0.00719552	-0.736348	down
ENSMUSG00000091712	Sec14l5	517	728	365	601	659	322	201	492	47	87	2.39297	3.22664	1.56372	2.71459	2.89902	1.41537	0.830857	2.28169	0.539537	0.38996	0.00492251	-1.26965	down
ENSMUSG00000026888	Grb14	396	333	404	471	504	281	281	205	230	236	5.60379	4.47197	5.20525	6.53873	7.01649	3.78461	3.6003	2.9626	3.42643	3.13462	6.61658e-06	-0.705551	down
ENSMUSG00000029685	Asb15	3337	3659	1769	3735	4814	2098	2807	2141	2183	1503	20.2964	21.3192	9.96933	22.1679	27.8189	12.142	15.2467	13.0475	13.6298	8.85169	0.00155206	-0.602902	down
ENSMUSG00000024105	Themis3	37	57	6	14	45	51	79	103	45	70	0.380548	0.564691	0.053414	0.137558	0.445376	0.498355	0.729211	1.07018	0.477828	0.708142	0.00917738	1.26503	up
ENSMUSG00000060147	Serpinb6a	9743	11721	8608	9358	9201	13441	14768	14407	12554	20068	172.297	202.492	138.435	162.137	154.982	226.903	232.622	252.392	223.44	333.397	0.000393754	0.731364	up
ENSMUSG00000068373	D430041D05Rik	59	97	76	113	84	28	28	57	26	4	0.119761	0.188156	0.143669	0.224993	0.162363	0.053812	0.049414	0.114994	0.053431	0.006054	0.000337876	-1.55378	down
NewGene_9677	NewGene_9677	195	138	223	310	322	124	139	130	143	71	1.45707	1.06013	1.57188	2.12075	2.37458	0.749531	0.945919	0.937926	1.22137	0.623622	0.000148356	-0.914606	down
ENSMUSG00000026251	Chrnd	72	39	70	51	67	38	34	35	47	12	0.647315	0.33186	0.581154	0.443049	0.575632	0.320441	0.26624	0.313277	0.428987	0.100352	0.0119099	-0.835678	down
ENSMUSG00000069763	Tmem100	976	768	1597	1094	1087	2647	1665	2356	1935	2231	14.6712	11.0619	22.2618	16.0584	15.5391	37.8978	22.3751	35.5327	29.8728	32.5016	2.35031e-05	1.0149	up
ENSMUSG00000030309	Caprin2	159	161	69	90	194	111	93	93	52	63	1.25348	1.1913	0.454354	0.626759	1.34703	0.839334	0.592836	0.71861	0.379398	0.434313	0.0282267	-0.62651	down
ENSMUSG00000044043	Pcdhb14	75	88	74	41	118	46	46	69	45	21	0.228044	0.25555	0.208114	0.119667	0.34239	0.133064	0.124986	0.21095	0.138757	0.060291	0.0185234	-0.744519	down
NewGene_8199	NewGene_8199	55	58	67	78	77	78	74	96	84	153	3.00551	2.9891	3.36413	4.15804	3.99185	4.04369	3.6146	5.24311	4.69695	8.08577	0.033326	0.652903	up
ENSMUSG00000032332	Col12a1	122	198	68	92	297	98	97	90	88	76	1.12972	0.514468	0.230374	0.20552	0.681607	0.214505	0.344659	0.207839	0.778624	0.666635	0.030979	-0.668054	down
ENSMUSG00000030409	Dmpk	3961	4607	3582	4279	4612	2624	3082	2502	2266	2433	38.7367	43.4179	32.5008	41.3394	43.0202	24.6799	26.9294	24.6441	22.6	23.153	4.58751e-08	-0.62794	down
ENSMUSG00000045211	Nudt18	798	790	749	615	536	1383	1095	852	991	840	5.59979	5.2168	4.85466	4.10396	3.58332	9.02721	6.7395	5.82839	7.13028	5.59865	0.00153239	0.595416	up
ENSMUSG00000024524	Gnal	54	98	65	39	84	228	96	71	63	195	0.248938	0.431968	0.276755	0.174185	0.367047	1.02761	0.395161	0.327726	0.298417	0.870501	0.0106676	1.04558	up
ENSMUSG00000006641	Slc5a6	137	296	113	239	229	430	169	228	318	336	1.05248	2.27276	0.812946	1.80442	1.70322	3.34093	1.16326	1.78634	2.52279	2.50912	0.0245161	0.648482	up
NewGene_4277	NewGene_4277	55	52	58	97	48	129	78	183	224	48	0.544267	0.509562	0.545812	1.46129	0.641607	1.3784	0.708703	2.75672	2.44941	0.604232	0.00324051	1.11108	up
ENSMUSG00000037692	Ahdc1	310	355	319	404	492	306	230	187	222	56	1.24684	1.41415	1.18735	1.62925	1.87976	1.16997	0.890743	0.754011	0.917208	0.216895	0.00166042	-0.885743	down
ENSMUSG00000031274	Col4a5	184	336	106	221	494	194	149	111	160	85	0.74635	1.30743	0.398457	0.873895	3.36524	0.748437	0.541087	0.452261	0.664182	0.334458	0.00596837	-0.840129	down
ENSMUSG00000031596	Slc7a2	1994	2473	2554	2346	2747	2253	5266	3447	3128	4246	7.8018	8.16537	9.20602	7.86443	8.9424	7.21897	15.9885	13.7205	11.1395	14.109	0.00394125	0.69641	up
ENSMUSG00000055148	Klf2	1502	1006	2058	3543	2773	813	921	1236	985	883	21.6098	13.86	27.4498	49.7661	37.9121	11.1296	11.8343	17.8273	14.5525	12.3003	0.000161806	-1.08723	down
ENSMUSG00000110104	Gm45717	38	36	24	710	518	32	51	6	30	26	2.02067	1.81194	1.16844	37.2161	26.4181	1.6346	2.4181	0.299954	1.61471	1.32544	0.00165782	-3.04274	down
ENSMUSG00000035459	Stab2	629	608	535	506	589	761	672	1118	860	730	2.03202	1.87981	1.60131	1.59424	1.8061	2.33946	1.93734	3.61904	2.85212	2.28409	0.0005044	0.595713	up
ENSMUSG00000028268	Gbp3	188	351	256	346	395	217	129	186	200	116	1.8459	3.35818	2.35217	3.39271	3.81551	2.16293	1.14188	1.96176	2.05673	1.1059	4.54124e-05	-0.789726	down
ENSMUSG00000024892	Pcx	2059	3005	1656	2381	3793	6139	2384	2092	2748	5995	13.4369	18.8007	9.83952	15.1628	23.5719	38.2217	13.6461	13.6725	18.4278	38.0217	0.0290639	0.720761	up
ENSMUSG00000002985	Apoe	6047	9498	3251	6751	9047	23615	4883	4097	9608	14658	114.632	173.895	57.0466	125.091	164.039	427.402	82.6663	77.9298	186.74	269.43	0.0434588	0.819599	up
NewGene_6757	NewGene_6757	61	60	62	78	74	98	103	93	132	112	1.08947	1.01953	1.01693	1.34581	1.25307	1.6543	1.63398	1.66235	2.4225	1.93729	0.000159417	0.760575	up
ENSMUSG00000031380	Vegfd	128	138	193	114	201	258	307	200	178	353	1.65066	1.70691	2.30981	1.43782	2.47152	3.17796	3.55528	2.58875	2.36692	4.42892	0.00307972	0.840803	up
NewGene_711	NewGene_711	294	436	149	196	357	196	170	259	145	117	1.46668	2.15161	0.696978	0.925968	1.84423	0.911425	0.759658	1.27025	0.759431	0.529	0.0241424	-0.609883	down
NewGene_5299	NewGene_5299	89	114	34	75	75	15	19	71	34	19	0.721861	0.914086	0.256539	0.660353	0.575332	0.109579	0.170394	0.727791	0.308046	0.142724	0.00760263	-1.2075	down
ENSMUSG00000020053	Igf1	410	708	249	420	727	1282	702	512	727	793	1.78609	2.96133	1.00389	1.72844	2.94664	5.68149	2.60489	2.4069	3.27807	4.89064	0.00363341	0.775862	up
ENSMUSG00000036502	Tmem255a	44	62	49	66	74	42	32	8	37	34	0.341276	0.461893	0.351323	0.502065	0.549064	0.311962	0.2225	0.112652	0.296607	0.252098	0.0152972	-0.865523	down
ENSMUSG00000022360	Atad2	70	82	55	104	107	79	65	48	40	34	0.326862	0.364637	0.236579	0.47309	0.472065	0.351491	0.271194	0.2248	0.190783	0.149941	0.015819	-0.589147	down
NewGene_9279	NewGene_9279	106	112	228	171	85	75	76	114	108	65	2.90537	3.10631	5.30933	4.74059	2.29214	2.00289	2.14072	3.0809	3.06218	1.91766	0.0470315	-0.666304	down
ENSMUSG00000043673	Kcns3	54	68	44	48	62	227	48	19	128	115	0.485687	0.588728	0.363189	0.418336	0.533238	1.9581	0.387909	0.16985	1.18474	1.00837	0.0367845	1.01418	up
ENSMUSG00000036334	Igsf10	52	81	39	68	138	44	53	48	48	25	0.136098	0.204259	0.093444	0.174819	0.345498	0.109946	0.123085	0.126144	0.129401	0.063647	0.0206825	-0.695733	down
NewGene_1865	NewGene_1865	38	32	25	34	49	55	75	46	55	45	0.78121	0.627135	0.461637	0.669903	0.974961	1.09058	1.42992	0.911687	1.17387	0.882642	0.00398425	0.707961	up
ENSMUSG00000018983	E2f2	61	79	33	78	88	37	37	56	27	21	0.337959	0.422517	0.168679	0.424924	0.466662	0.196492	0.185088	0.314277	0.154036	0.111852	0.00525917	-0.848242	down
ENSMUSG00000029168	Dpysl5	55	108	58	77	84	47	47	61	55	27	0.281387	0.528301	0.272215	0.381859	0.404454	0.228083	0.213715	0.308987	0.285207	0.132701	0.0106981	-0.622765	down
ENSMUSG00000021319	Sfrp4	64	114	25	87	102	46	38	36	30	14	0.714142	1.3138	0.150148	1.3752	1.15957	0.524303	0.322662	0.529166	0.351965	0.194522	0.00117649	-1.18344	down
ENSMUSG00000028341	Nr4a3	165	284	170	215	114	197	102	2429	183	598	0.766648	1.26052	0.730606	1.09822	0.502863	0.868153	0.421171	11.3132	0.869437	2.68819	0.0171821	1.98028	up
ENSMUSG00000027996	Sfrp2	25	190	30	75	126	39	6	40	28	56	0.321041	2.40712	0.364633	0.965277	1.58821	0.490298	0.062682	0.528558	0.377249	0.719783	0.0417563	-1.21203	down
ENSMUSG00000035692	Isg15	81	92	76	69	54	57	43	37	77	19	3.03637	3.29721	2.65865	2.51726	1.93535	2.04218	1.45174	1.37203	2.96785	0.692966	0.0386058	-0.664905	down
ENSMUSG00000026385	Dbi	2896	3304	2818	3799	3365	7937	3047	2693	4917	7021	135.754	148.076	122.429	173.816	149.332	353.436	127.347	126.753	237.28	318.044	0.00923682	0.75099	up
NewGene_1796	NewGene_1796	22	45	28	9	61	85	63	64	57	143	0.474529	0.806692	0.449565	0.167871	1.0793	1.58544	1.03051	1.17664	1.06759	3.01583	0.00138921	1.48714	up
ENSMUSG00000040146	Rgl3	28	66	42	39	58	79	43	55	68	84	0.215339	0.618538	0.302078	0.298506	0.43328	0.586978	0.300651	0.434074	0.551252	0.636305	0.0469271	0.600699	up
ENSMUSG00000054404	Slfn5	1412	1527	1057	1688	2549	1437	1066	1232	937	536	6.28524	6.52559	4.3564	7.35064	10.801	6.11202	4.23196	5.48647	4.27027	2.30808	0.00370314	-0.596024	down
ENSMUSG00000073421	H2-Ab1	788	1472	285	1390	1062	767	364	570	660	582	17.2726	30.9145	5.77947	29.7954	22.1332	16.0022	7.11974	12.5266	14.8606	12.3916	0.0452984	-0.657917	down
ENSMUSG00000040430	Pitpnc1	2019	1980	1788	2503	2834	1454	1297	1701	1741	804	9.67426	9.09934	7.78709	11.5115	12.7281	6.36478	5.55023	7.97483	8.18886	3.74834	0.000132868	-0.612823	down
NewGene_10432	NewGene_10432	35	45	18	5	24	77	35	52	44	45	0.735283	0.773428	0.286119	0.075767	0.41506	1.33288	0.55111	0.98015	0.796082	0.892383	0.0211052	1.05166	up
ENSMUSG00000000049	Apoh	16	17	8	13	5	41	76	148	59	155	0.341979	0.36112	0.157959	0.279973	0.105997	0.865382	1.50557	3.31068	1.33021	3.43073	6.82167e-10	3.14587	up
ENSMUSG00000090733	Rps27	4322	4896	4389	5297	2778	5724	5257	4751	6129	8828	331.589	332.395	311.17	395.981	201.803	418.124	358.708	365.154	482.524	654.9	0.0284434	0.588828	up
ENSMUSG00000022094	Slc39a14	519	578	566	439	595	690	1136	457	573	1128	2.78676	2.98986	2.82903	2.30285	3.14384	3.57153	5.59155	2.51632	3.23677	6.03181	0.0220758	0.66755	up
NewGene_5018	NewGene_5018	66	46	62	88	115	27	36	42	36	50	2.40307	1.52318	1.98781	2.98935	3.67924	0.888269	1.14792	1.49787	1.38823	1.74192	0.00569046	-0.865979	down
ENSMUSG00000072964	Bhlhb9	185	240	131	262	276	533	172	150	275	540	1.7452	2.16093	1.14068	2.42172	2.54441	4.80184	1.44275	1.40942	2.652	4.94179	0.0491384	0.738699	up
ENSMUSG00000074622	Mafb	1180	972	2402	1927	1797	737	654	550	547	652	9.32433	7.35883	17.597	14.8647	13.4969	5.54374	4.61464	4.35122	4.43367	4.98635	2.55423e-07	-1.34842	down
ENSMUSG00000036437	Npy1r	481	483	532	685	707	443	532	214	347	191	4.31154	4.12226	4.38039	5.94295	5.99585	3.73524	4.23303	2.05334	3.15477	1.63852	0.00345564	-0.700884	down
ENSMUSG00000018169	Mfng	335	423	303	390	412	1158	260	381	829	454	4.76256	5.77612	3.99792	5.42309	5.57943	15.7105	3.308	5.4362	12.1268	6.26175	0.0137356	0.7625	up
ENSMUSG00000037379	Spon2	42	42	65	59	70	56	43	19	19	25	0.534423	0.522896	0.771415	0.748613	0.859736	0.685739	0.49941	0.240824	0.242538	0.314014	0.033511	-0.737471	down

## Sheet: Model_vs_L-YP.DEG  DESeq2
Supplementary Table 2: Model_vs_L-YP.DEG DESeq2
#ID	Symbol	B4_Count	B3_Count	B2_Count	B1_Count	B5_Count	C5_Count	C4_Count	C3_Count	C2_Count	C1_Count	B4_FPKM	B3_FPKM	B2_FPKM	B1_FPKM	B5_FPKM	C5_FPKM	C4_FPKM	C3_FPKM	C2_FPKM	C1_FPKM	Pvalue	log2FC	regulated
NewGene_10320	NewGene_10320	148	267	164	60	448	33	52	64	51	60	3.83982	6.52735	4.50025	1.68531	12.9094	0.929529	1.3171	1.65888	1.34472	1.62039	2.20644e-06	-2.28753	down
ENSMUSG00000029368	Alb	188	4	2440	102	1802	19	137	205	14	27	2.33124	0.046704	31.9654	1.35736	22.8077	0.256384	1.65382	2.55822	0.176305	0.341014	0.00295346	-3.81569	down
NewGene_6639	NewGene_6639	125	130	175	179	160	87	117	169	102	73	2.55764	2.4745	3.76366	3.9661	3.30547	1.98687	2.44281	3.60654	2.06729	1.59963	0.00655353	-0.665912	down
ENSMUSG00000019932	Kera	58	45	59	68	99	177	120	161	323	71	0.635888	0.463592	0.684086	0.810067	1.10898	2.13379	1.28788	1.79705	3.64954	0.809486	0.00271792	1.16508	up
ENSMUSG00000019933	Mrln	1852	1933	2614	2570	4372	1112	2483	1732	2433	1932	106.822	105.266	158.868	160.304	256.647	70.048	140.196	100.767	143.388	115.936	0.0419593	-0.660121	down
ENSMUSG00000038637	Lrrc56	44	45	35	24	35	94	88	101	50	30	0.442201	0.424286	0.374567	0.260159	0.35446	1.04103	0.868561	1.02871	0.514523	0.308158	0.015062	0.802374	up
ENSMUSG00000046186	Cd109	51	60	58	47	16	130	66	118	168	46	0.216667	0.241921	0.259311	0.215232	0.067402	0.612227	0.273757	0.512964	0.735049	0.205173	0.00527441	1.05539	up
NewGene_2038	NewGene_2038	295	467	110	277	304	66	115	99	317	91	2.0096	2.97732	0.737687	1.96855	1.91962	0.642083	0.901753	0.813617	2.47103	1.02338	0.00566799	-1.22847	down
ENSMUSG00000051726	Kcnf1	93	327	108	214	153	116	102	108	190	69	0.486639	1.62039	0.599993	1.21889	0.817231	0.667609	0.522711	0.569615	1.01967	0.378801	0.0340415	-0.779554	down
ENSMUSG00000016356	Col20a1	112	122	107	91	37	217	130	160	125	144	0.610125	0.592988	0.567413	0.550403	0.188625	1.26276	0.634905	0.822012	0.686234	0.751697	0.0208409	0.615206	up
ENSMUSG00000022053	Ebf2	579	378	82	380	84	754	721	614	620	244	2.83588	1.7209	0.778111	2.28386	0.772506	4.07656	3.92924	3.57604	3.12369	1.23043	0.0479063	0.866079	up
ENSMUSG00000022018	Rgcc	6914	9861	3575	4405	9663	2753	5263	5077	3927	6274	190.55	255.09	103.77	130.952	271.016	82.7548	141.274	140.915	110.23	179.699	0.0379637	-0.717462	down
ENSMUSG00000014837	4931428F04Rik	42	70	32	40	53	35	40	32	34	34	0.294731	0.469925	0.242974	0.312177	0.390666	0.270888	0.272865	0.230908	0.250241	0.236741	0.0485422	-0.597108	down
NewGene_5369	NewGene_5369	39	23	21	32	18	56	42	40	67	45	0.546902	0.296113	0.308835	0.577444	0.255283	0.940051	0.568735	0.585254	0.983428	0.670034	0.00719545	0.791581	up
ENSMUSG00000070469	Adamtsl3	150	115	158	161	47	394	142	272	207	140	0.522522	0.375646	0.579094	0.602569	0.163627	1.49792	0.481995	0.974692	0.734957	0.506259	0.0220926	0.745909	up
ENSMUSG00000054641	Mmrn1	82	137	55	90	50	208	174	586	944	76	0.458843	0.724853	0.321836	0.543243	0.286257	1.27815	0.950423	3.33227	5.43675	0.441792	5.97773e-05	2.11389	up
ENSMUSG00000024042	Sik1	317	319	402	275	311	264	196	224	290	177	1.77021	1.67516	2.36461	1.65705	1.76799	1.60811	1.0652	1.26132	1.64938	1.02584	0.000386852	-0.654843	down
ENSMUSG00000016252	Atp5e	5625	6200	6129	6900	17120	5133	6601	5331	6223	5477	338.029	349.704	387.921	447.259	1047	336.467	386.397	322.656	380.924	342.045	0.0261727	-0.778747	down
ENSMUSG00000078922	Tgtp1	174	149	230	261	100	324	342	225	184	455	1.5508	1.2984	2.22394	2.51559	0.905132	3.16564	2.98299	2.02873	1.67696	4.22955	0.0355324	0.656185	up
ENSMUSG00000078921	Tgtp2	230	138	199	229	167	380	336	236	209	474	2.06248	1.16629	1.87818	2.22054	1.52889	3.72609	2.944	2.13313	1.90974	4.42917	0.0175754	0.658214	up
ENSMUSG00000051413	Plagl2	171	145	176	124	53	287	233	221	231	187	0.787594	0.617392	0.83736	0.60115	0.241783	1.44018	1.03024	1.02307	1.06443	0.879439	0.00398704	0.676773	up
ENSMUSG00000075705	Msrb1	4930	5733	5225	4123	7746	3774	4053	4654	3577	3994	131.441	145.344	148.126	120.512	213.682	109.087	103.162	123.481	97.7877	110.041	0.0045514	-0.651845	down
ENSMUSG00000026822	Lcn2	836	1319	1134	1197	2031	1000	732	836	638	828	23.0962	34.2212	33.014	35.6686	57.1235	30.1531	19.6757	23.2594	17.957	23.7852	0.00176741	-0.890443	down
ENSMUSG00000006369	Fbln1	241	174	145	311	184	446	278	406	725	134	2.20406	1.29928	1.32377	2.96074	1.48163	4.20337	2.25869	3.35816	6.06561	1.13556	0.032032	0.751768	up
NewGene_1148	NewGene_1148	78	566	443	623	73	56	44	58	330	19	2.22449	15.1624	13.3276	19.1941	2.10789	1.74203	1.21132	1.64343	9.58646	0.560509	0.0247545	-1.93936	down
NewGene_1147	NewGene_1147	185	128	179	199	137	118	110	123	156	90	4.90858	3.18167	5.02049	5.70148	3.70309	3.4173	2.83203	3.28691	4.2305	2.46478	0.000875356	-0.614883	down
ENSMUSG00000034041	Lyl1	137	83	113	103	74	197	146	202	165	136	1.96987	1.10182	1.70152	1.57458	1.10925	2.93416	2.01656	2.78399	2.30693	1.99413	0.000781955	0.595099	up
ENSMUSG00000073125	Xlr3b	53	29	35	25	23	77	39	125	123	123	0.855371	0.431501	0.582919	0.4209	0.36279	1.355	0.601203	2.03244	2.01951	2.05304	0.000116037	1.47459	up
ENSMUSG00000004815	Dgkq	256	79	144	93	172	96	76	116	81	58	1.25451	0.350061	0.73212	0.492134	0.835188	0.518359	0.366033	0.570474	0.404421	0.292239	0.00284003	-0.964446	down
ENSMUSG00000051022	Hs3st1	51	58	109	63	42	160	154	106	106	54	0.756769	0.81354	1.71925	1.01917	0.631639	2.61341	2.24623	1.59375	1.62716	0.828313	0.0312507	0.670485	up
ENSMUSG00000014164	Klhl3	33	63	37	36	7	98	86	59	62	55	0.115711	0.207138	0.134348	0.1355	0.023555	0.374739	0.296377	0.207754	0.22348	0.199393	0.0205249	0.913388	up
ENSMUSG00000029075	Tnfrsf4	39	36	43	55	5	58	57	70	73	70	0.941672	0.82376	1.08737	1.44357	0.118991	1.55158	1.3581	1.72169	1.8067	1.77604	0.049082	0.802233	up
NewGene_10008	NewGene_10008	219	168	239	191	44	469	215	375	303	193	2.16426	1.82234	2.07755	2.74567	0.297074	3.77229	2.51436	4.02426	3.23731	2.02509	0.0306296	0.738289	up
ENSMUSG00000028957	Per3	615	395	557	569	255	1219	637	1100	438	626	2.59984	1.58	2.47174	2.58871	1.09496	5.63921	2.62062	4.71635	1.8903	2.74698	0.0220876	0.621487	up
ENSMUSG00000067279	Ppp1r3c	4203	7155	5168	6148	10428	3890	4262	4481	5613	2907	39.0221	62.3499	50.5324	61.5717	98.5286	39.4001	38.5382	41.893	53.0842	28.0468	0.00274876	-0.862508	down
ENSMUSG00000047443	Erfe	97	28	41	58	41	26	36	44	38	18	0.8655	0.251717	0.379853	0.564909	0.370082	0.248428	0.313844	0.397274	0.347228	0.165689	0.0171688	-0.845299	down
ENSMUSG00000033834	Tpbpa	10	98	354	45	178	21	40	84	69	25	0.149119	1.42577	5.9016	0.747017	2.81892	0.345147	0.593036	1.31689	1.10182	0.396538	0.0113067	-1.74959	down
ENSMUSG00000017718	Afmid	75	57	35	35	107	34	36	23	42	26	0.805378	0.586894	0.408406	0.400327	1.18292	0.478403	0.385379	0.258127	0.478775	0.292118	0.00511334	-1.14089	down
NewGene_6386	NewGene_6386	57	45	45	27	15	59	93	57	82	58	0.513528	0.375452	0.420523	0.257629	0.137765	0.57263	0.812564	0.518137	0.751639	0.53797	0.0135957	0.771999	up
NewGene_3027	NewGene_3027	124	72	96	126	25	255	118	247	136	141	0.640481	0.347003	0.534965	0.696835	0.185322	1.43217	0.592027	1.28401	0.723846	0.748215	0.00876585	0.915971	up
ENSMUSG00000071497	Nutf2-ps1	267	93	491	217	160	108	133	248	129	157	7.49213	2.4362	14.4998	6.56611	4.56056	3.28564	3.63035	6.98626	3.6724	4.56055	0.0408929	-0.789035	down
ENSMUSG00000043099	Hic1	328	248	412	362	90	811	511	571	405	403	2.36917	1.6816	3.13638	2.82261	0.659178	6.39395	3.60114	4.15841	2.98427	3.0266	0.00858195	0.789937	up
ENSMUSG00000034958	Atcay	173	111	129	100	38	163	169	248	212	115	1.17071	0.701113	0.918709	0.72711	0.261111	1.19917	1.11394	1.6884	1.46187	0.806822	0.0379684	0.607539	up
ENSMUSG00000031431	Tsc22d3	17041	21336	17723	15167	23995	10033	10368	10375	11776	10898	221.947	260.56	242.724	215.246	315.802	143.868	132.769	137.34	156.701	149.388	1.12687e-06	-1.00076	down
ENSMUSG00000035849	Krt222	41	27	45	47	30	88	102	104	77	62	0.331489	0.205897	0.388873	0.415365	0.251112	0.782433	0.812965	0.862816	0.641843	0.537312	3.72322e-06	1.03713	up
ENSMUSG00000041559	Fmod	968	985	1514	950	910	3662	1754	3910	8638	1106	7.84502	7.4958	12.9258	8.30545	7.50289	32.3912	13.8514	31.9268	71.371	9.31807	4.65153e-05	1.66961	up
ENSMUSG00000023078	Cxcl13	333	183	60	127	331	68	132	143	167	28	7.32154	3.76804	1.38316	2.99043	7.40905	1.62777	2.82652	3.15749	3.73509	0.623575	0.0193714	-1.16212	down
ENSMUSG00000035105	Egln3	1268	2306	1057	1039	2546	1252	794	620	1491	983	12.0457	20.57	10.5721	10.65	24.6239	12.9716	7.34483	5.92607	14.4271	9.70897	0.0144031	-0.865884	down
NewGene_8953	NewGene_8953	50	47	49	35	29	19	39	30	25	29	0.565496	0.523425	0.580456	0.419646	0.336957	0.230179	0.428566	0.454175	0.290619	0.333256	0.0156496	-0.69522	down
NewGene_8954	NewGene_8954	38	41	18	44	44	20	22	23	38	20	0.650426	0.596398	0.276018	0.849021	0.849325	0.465946	0.3257	0.448033	0.88486	0.400623	0.0413726	-0.746496	down
ENSMUSG00000014773	Dll1	109	75	162	126	51	311	195	167	143	117	0.76729	0.493107	1.26596	0.993155	0.363585	2.38969	1.33706	1.30169	1.02905	0.85731	0.0227509	0.690834	up
NewGene_4397	NewGene_4397	86	60	60	75	161	47	90	66	52	50	2.1684	1.42271	1.60487	2.04984	4.1565	1.29676	2.22002	1.68564	1.32891	1.31714	0.0431525	-0.754985	down
ENSMUSG00000034586	Hid1	69	82	56	81	54	188	137	152	138	91	0.525561	0.589762	0.449042	0.669253	0.424106	1.57676	1.02842	1.17898	1.08148	0.729412	8.05032e-06	0.890733	up
ENSMUSG00000000881	Dlg3	106	97	51	94	36	127	146	170	133	93	0.678014	0.588791	0.366589	0.600179	0.182322	0.905513	0.72617	1.09214	0.905886	0.485088	0.00778689	0.677951	up
ENSMUSG00000020205	Phlda1	196	191	277	134	255	143	103	184	177	103	2.53465	2.31527	3.77981	1.86569	3.36518	2.02393	1.29231	2.39632	2.33083	1.37624	0.00702539	-0.749405	down
ENSMUSG00000020423	Btg2	1317	2673	1671	1205	1388	926	1099	918	1838	724	12.1468	23.138	16.2289	11.9881	13.0208	9.3153	9.87095	8.52741	17.2654	6.93683	0.00793706	-0.742534	down
ENSMUSG00000041974	Spidr	98	42	62	80	55	128	162	112	117	49	0.751521	0.296765	0.499143	0.659512	0.431466	1.07214	1.21152	0.867039	0.915821	0.388112	0.0387505	0.58964	up
ENSMUSG00000035674	Ndufa3	2318	2640	2338	2545	4938	1815	2583	2016	2418	2390	115.094	125.497	124.681	136.006	251.81	100.291	127.184	101.422	121.912	125.724	0.0408001	-0.593434	down
ENSMUSG00000059857	Ntng1	38	30	18	45	10	61	55	46	59	54	0.170614	0.131366	0.084873	0.293033	0.045594	0.298725	0.241141	0.249016	0.27049	0.250997	0.010346	0.865287	up
NewGene_5418	NewGene_5418	218	461	301	229	339	159	217	271	194	273	5.75625	9.33331	7.25449	6.46339	7.90447	3.55774	3.72416	6.47295	4.74225	5.76212	0.0307573	-0.624057	down
ENSMUSG00000056214	Pard6g	213	82	58	135	58	201	279	252	241	75	1.70976	0.616855	0.490369	1.16338	0.473236	1.75982	2.18209	2.03501	1.9737	0.623402	0.026061	0.808981	up
ENSMUSG00000057322	Rpl38	1455	1570	1315	1655	2953	729	1798	1129	1711	1239	99.1513	100.616	94.7577	121.421	204.925	54.1547	119.528	77.3729	119.09	87.8995	0.049831	-0.63805	down
ENSMUSG00000050164	Mchr1	34	34	46	44	10	238	36	109	23	61	0.385835	0.365258	0.559696	0.541189	0.10798	2.99477	0.397771	1.2572	0.265867	0.73031	0.0173451	1.3409	up
ENSMUSG00000020826	Nos2	193	117	217	221	68	368	302	248	238	249	1.15937	0.661293	1.37385	1.57439	0.416114	2.7349	2.01025	1.50596	1.7684	1.5603	0.0102372	0.671008	up
ENSMUSG00000002910	Arrdc2	9075	11711	4063	9315	7347	1862	4316	4760	9193	4875	97.4973	118.099	45.9749	107.947	80.322	21.8183	45.164	51.5037	100.605	54.4225	0.0196633	-0.850456	down
ENSMUSG00000013584	Aldh1a2	60	33	50	25	14	204	28	115	55	52	0.66996	0.337703	0.577174	0.300085	0.156111	2.48666	0.300296	1.28788	0.622929	0.600972	0.0182063	1.19243	up
ENSMUSG00000058207	Serpina3k	423	56	387	17	1298	142	137	247	3	37	5.20274	0.635539	5.01373	0.214145	16.2364	1.90174	1.63133	3.05894	0.037506	0.465111	0.0456205	-2.3071	down
ENSMUSG00000041607	Mbp	1677	1523	1112	1799	258	2860	3503	1901	1580	1574	20.5149	17.9137	14.7255	23.9049	2.77211	38.3954	41.4385	23.0331	19.7247	20.3397	0.040162	0.733364	up
ENSMUSG00000056501	Cebpb	2058	2793	1918	2420	3169	1216	1816	1445	2900	1706	34.6218	44.0904	33.975	43.9069	54.2502	22.3046	29.7423	24.4723	49.6926	29.8163	0.0279052	-0.610141	down
ENSMUSG00000028989	Angptl7	346	628	362	398	548	1132	364	1872	4317	352	4.05353	6.91154	4.46434	5.03347	6.54149	14.4841	4.15272	22.1072	51.5732	4.28896	0.0157792	1.62332	up
ENSMUSG00000028982	Slc25a33	1053	1288	1170	1126	1667	917	902	1037	759	809	14.1092	16.201	16.5159	16.2838	22.7418	13.4035	11.7802	13.9943	10.3567	11.2598	0.0008427	-0.695153	down
ENSMUSG00000042453	Reln	191	204	118	133	38	236	203	227	360	148	0.411634	0.412091	0.266641	0.308825	0.083619	0.556262	0.42574	0.49254	0.792386	0.330727	0.0458084	0.6767	up
ENSMUSG00000056749	Nfil3	531	786	870	758	802	321	447	412	678	430	6.61999	9.21054	11.4359	10.2089	10.1861	4.36439	5.43696	5.17789	8.61753	5.5713	0.000466781	-0.868853	down
NewGene_10494	NewGene_10494	87	151	90	71	163	61	64	77	45	66	4.60924	7.53009	5.02695	4.02099	8.78082	3.51742	3.28434	4.10186	2.41086	3.5977	0.00195561	-1.03075	down
ENSMUSG00000039157	Fam102a	270	192	278	302	61	443	392	364	299	354	1.61576	1.07646	1.75199	1.94433	0.370299	2.89406	2.28352	2.19376	1.8237	2.20105	0.027952	0.652401	up
ENSMUSG00000063146	Clip2	217	164	173	201	47	351	264	288	246	202	1.09839	0.785559	0.923151	1.09752	0.240639	1.97758	1.30137	1.46722	1.26485	1.08064	0.0202032	0.645067	up
ENSMUSG00000022371	Col14a1	239	166	110	150	63	337	177	301	275	186	1.63458	0.999919	0.68089	1.09053	0.341556	2.27489	1.03182	1.96121	1.68049	1.17557	0.0111475	0.703416	up
ENSMUSG00000027597	Ahcy	1627	1920	1648	1601	3652	1144	1678	1638	1978	1370	16.1694	17.9257	17.2646	17.1748	36.9714	12.3966	16.2541	16.412	20.0421	14.1586	0.0403014	-0.632646	down
ENSMUSG00000060572	Mfap2	84	52	61	41	43	98	77	130	110	53	1.96712	1.1406	1.51189	1.03895	1.00817	2.50018	1.76534	3.08335	2.64228	1.28282	0.0273057	0.589181	up
ENSMUSG00000027208	Fgf7	188	136	164	129	96	268	165	228	339	194	1.81407	1.21185	1.66534	1.38102	0.96923	2.79742	1.58837	2.21938	3.3309	2.03804	0.00575162	0.620844	up
NewGene_4618	NewGene_4618	80	48	48	87	25	135	128	93	88	54	1.34755	0.76528	0.697565	1.43336	0.282551	2.50778	1.76654	1.52524	1.5383	1.00244	0.0302557	0.656681	up
NewGene_4616	NewGene_4616	6436	12071	12851	8639	13831	11689	5556	7615	4164	6527	43.6989	69.5788	86.0616	56.6221	84.2031	80.9773	30.0151	65.8349	25.2584	33.5844	0.0100822	-0.792675	down
ENSMUSG00000021974	Fgf9	48	39	40	35	21	60	52	82	87	69	0.37092	0.297889	0.385664	0.351806	0.192968	0.64981	0.484384	0.712395	0.768035	0.68241	0.00204503	0.822255	up
ENSMUSG00000045730	Adrb2	777	1115	610	1038	1656	824	714	690	756	780	9.16899	12.3505	7.57974	13.2059	19.8808	10.5996	8.19902	8.18935	9.077	9.5654	0.0251737	-0.657203	down
ENSMUSG00000020646	Mboat2	47	51	55	43	24	126	76	101	63	66	0.174171	0.177768	0.296014	0.169893	0.088557	0.674875	0.274799	0.393971	0.23639	0.253928	0.00154517	0.834287	up
ENSMUSG00000020644	Id2	189	147	191	136	64	221	348	248	270	257	3.74906	2.73259	3.99264	2.92895	1.28298	4.44246	6.76405	4.37858	5.47603	5.38148	0.000926473	0.777856	up
ENSMUSG00000040152	Thbs1	408	535	318	316	210	627	534	980	2373	236	1.76368	2.17052	1.44538	1.47108	0.921879	2.95854	2.24662	4.26682	10.456	1.05983	0.00489984	1.26894	up
ENSMUSG00000017969	Ptgis	121	115	105	85	113	197	106	206	301	110	1.51218	1.3229	1.40076	1.20289	1.47901	2.63293	1.32505	2.56132	3.77464	1.44156	0.0390459	0.607999	up
ENSMUSG00000102976	Zc3h11a	178	34	47	27	25	380	457	60	176	876	1.96741	0.75128	1.47646	0.933305	0.737096	3.92369	3.87387	1.49611	2.13959	5.73615	0.000600822	2.67476	up
ENSMUSG00000020251	Glt8d2	71	36	54	48	24	144	52	117	98	40	0.869577	0.385945	0.661827	0.587351	0.305809	1.84046	0.603728	1.44334	1.1708	0.501557	0.023689	0.814727	up
ENSMUSG00000042379	Esm1	71	39	73	58	24	66	130	101	151	84	0.845824	0.431944	0.91806	0.75278	0.294686	0.862225	1.51622	1.22276	1.85127	1.04397	0.00446698	0.891708	up
ENSMUSG00000117679	Apbb3	976	1570	778	768	1562	860	712	992	741	913	12.0692	18.3091	10.162	10.1528	19.694	11.6121	8.56379	12.2587	9.2567	11.6535	0.0345201	-0.597109	down
ENSMUSG00000054203	Ifi205	1071	911	475	823	1047	529	402	561	1001	326	16.7973	13.4034	7.83338	13.9235	16.7111	9.04069	6.13813	8.84829	15.9907	5.31269	0.0106849	-0.78891	down
ENSMUSG00000054204	Alkal2	84	39	30	68	36	15	38	42	35	13	1.39961	0.613294	0.527173	1.22939	0.602993	0.272326	0.613762	0.69656	0.589312	0.224304	0.0130343	-0.98534	down
ENSMUSG00000034936	Arl4d	522	1004	324	585	968	318	344	335	675	301	9.5491	17.2514	6.23766	11.536	18.0174	6.33226	6.1227	6.16192	12.5877	5.71507	0.00606038	-0.97413	down
ENSMUSG00000079429	Mroh2a	40	20	37	36	10	53	42	63	56	38	0.133695	0.062102	0.128326	0.12777	0.034075	0.191957	0.137425	0.210191	0.190915	0.131083	0.0329507	0.703408	up
ENSMUSG00000044006	Cilp2	41	49	69	21	19	83	30	109	254	37	0.236366	0.26608	0.422252	0.128806	0.111492	0.526694	0.16567	0.639933	1.51455	0.224862	0.025532	1.23246	up
ENSMUSG00000038552	Fndc4	39	40	42	42	22	67	45	69	78	54	0.498948	0.39972	0.494274	0.509324	0.247951	0.794112	0.479686	0.8587	1.06076	0.733317	0.013315	0.631464	up
ENSMUSG00000030727	Rabep2	125	98	49	95	46	213	183	151	105	100	1.41513	1.03891	0.566487	1.15395	0.520055	2.6231	2.03556	1.72809	1.18424	1.16195	0.00875321	0.731638	up
ENSMUSG00000003352	Cacnb3	60	64	61	58	34	92	110	96	85	80	0.596127	0.55754	0.58378	0.62679	0.317127	1.00591	0.989429	0.893678	0.868303	0.82818	0.00127768	0.605163	up
ENSMUSG00000034218	Atm	92	76	93	82	58	228	136	157	109	62	0.236703	0.183124	0.250728	0.225483	0.151865	0.638761	0.337996	0.405419	0.285164	0.164329	0.0225896	0.619116	up
ENSMUSG00000069372	Ctxn3	3324	3141	2224	2729	5360	1668	3097	2244	3661	1603	61.3407	54.9539	43.3145	54.4275	101.36	34.1505	55.9027	42.0853	70.5437	31.0488	0.0335722	-0.66105	down
NewGene_8741	NewGene_8741	43	37	58	59	17	89	64	70	80	73	0.267997	0.21498	0.385489	0.401992	0.10511	0.614414	0.395298	0.443265	0.512037	0.476817	0.0157981	0.70198	up
ENSMUSG00000060487	Samd5	157	133	170	151	34	332	185	200	210	257	0.579452	0.460536	0.660965	0.603913	0.125304	1.34137	0.665583	0.74414	0.791901	0.990781	0.0156153	0.791325	up
NewGene_2732	NewGene_2732	1853	639	315	532	4348	551	1038	778	609	299	9.91719	3.20457	1.77044	3.06242	23.7388	3.22223	5.43908	4.18527	3.31258	1.6703	0.0376674	-1.54868	down
ENSMUSG00000026556	Vangl2	44	48	32	31	14	73	73	74	54	38	0.169612	0.173582	0.12873	0.128685	0.053852	0.318845	0.273379	0.291465	0.209442	0.150049	0.0101997	0.748415	up
ENSMUSG00000044786	Zfp36	1422	1247	1008	933	1274	693	806	795	1527	501	12.9501	10.625	9.61747	9.20155	11.7558	6.86652	7.10896	7.30385	14.1721	4.71409	0.0206169	-0.611495	down
ENSMUSG00000041577	Prelp	1679	944	1333	1814	826	2704	2141	2842	3493	728	11.7449	6.19971	9.8226	13.6888	5.87851	20.6405	14.5929	20.0295	24.9036	5.29487	0.0227629	0.698639	up
ENSMUSG00000027035	Cers6	77	32	43	57	19	114	111	118	74	40	0.275601	0.105349	0.162771	0.219097	0.067437	0.446561	0.388547	0.426744	0.268094	0.14884	0.0110065	0.868433	up
ENSMUSG00000105504	Gbp5	138	162	173	165	78	323	238	160	184	278	1.12475	1.24849	1.5064	1.42694	0.531735	2.90723	1.88516	1.32874	1.53691	2.36606	0.0173696	0.615139	up
ENSMUSG00000029321	Slc10a6	359	350	166	244	196	142	95	123	294	112	4.27312	3.90472	2.07785	3.12622	2.36817	1.84062	1.0995	1.47339	3.55698	1.38466	0.00563002	-0.899853	down
ENSMUSG00000075330	A930003A15Rik	184	208	157	104	322	73	106	143	112	148	4.44362	4.61647	3.94344	2.72736	7.79065	1.9689	2.45844	3.60561	2.93889	3.65692	0.0117439	-0.921322	down
ENSMUSG00000031070	Mrgprf	75	64	85	57	23	154	84	125	124	61	0.907505	0.722219	1.07765	0.736074	0.274302	2.03434	0.991699	1.5201	1.52455	0.764657	0.0201255	0.719115	up
ENSMUSG00000047945	Marcksl1	44	15	43	33	39	75	64	89	68	36	0.688707	0.213371	0.710325	0.556953	0.61464	1.28704	0.969928	1.40802	1.08279	0.588122	0.0216831	0.755804	up
ENSMUSG00000021943	Gdf10	224	285	105	221	107	461	268	399	398	205	1.08546	1.29615	0.532107	1.15734	0.527582	2.43854	1.26375	1.94922	1.96491	1.03418	0.00831675	0.742642	up
ENSMUSG00000039304	Tnfsf10	456	414	533	427	202	901	755	680	505	563	2.38945	1.96822	3.04639	2.33358	1.0399	4.97959	3.78509	3.49077	2.60307	3.05075	0.00254961	0.616494	up
ENSMUSG00000022615	Tymp	33	55	49	42	14	48	77	65	69	63	0.398998	0.6377	0.634575	0.552036	0.172722	0.649096	0.924884	0.806937	0.870333	0.800974	0.0497968	0.623683	up
ENSMUSG00000063060	Sox7	523	379	592	733	200	883	1006	742	598	811	4.00491	2.72462	4.78137	6.05915	1.55717	7.38172	7.51144	5.72551	4.66764	6.45826	0.0155519	0.629266	up
ENSMUSG00000016262	Sertad4	99	79	104	73	19	183	121	151	123	95	0.74059	0.553529	0.82431	0.590978	0.144087	1.50339	0.888785	1.14193	0.945773	0.745427	0.0229339	0.734574	up
ENSMUSG00000039221	Rpl22l1	2613	2840	2385	3039	8359	1764	2859	2588	3103	2263	122.189	125.769	117.278	154.412	401.592	90.269	130.072	121.889	148.171	110.066	0.0265349	-0.856118	down
ENSMUSG00000026819	Slc25a25	1270	1031	3041	1357	1762	2407	555	939	521	645	10.8319	7.85946	26.9771	12.0591	15.0064	22.5507	4.26848	7.65702	4.24561	5.50181	0.0248149	-0.936858	down
ENSMUSG00000048402	Gli2	64	38	58	51	20	57	63	80	103	70	0.240277	0.134591	0.231148	0.206209	0.076788	0.242471	0.231039	0.306838	0.399241	0.276101	0.0487972	0.590139	up
ENSMUSG00000028364	Tnc	94	38	77	37	27	227	101	163	284	47	0.332498	0.124817	0.287948	0.141364	0.096504	0.881209	0.348876	0.581277	1.02698	0.170874	0.000912523	1.45484	up
NewGene_7512	NewGene_7512	105	141	143	100	221	69	103	66	90	105	2.96372	3.72749	4.25799	3.02501	6.35696	2.11663	2.82099	1.86048	2.59009	3.05572	0.00722968	-0.89397	down
ENSMUSG00000021356	Irf4	302	213	58	94	2296	143	154	137	106	62	1.60235	1.05707	0.323369	0.532858	12.4013	0.827738	0.793664	0.729216	0.570885	0.337591	0.00519213	-2.69762	down
ENSMUSG00000031343	Gabra3	29	23	11	41	18	49	64	68	38	40	0.193971	0.143238	0.080002	0.305515	0.123327	0.36797	0.425374	0.466489	0.267267	0.284092	0.00589363	0.945098	up
ENSMUSG00000029126	Nsg1	93	99	90	71	40	122	136	153	190	63	0.939103	0.910544	0.924871	0.751393	0.380748	1.30668	1.29263	1.54785	1.89249	0.664725	0.0270028	0.615075	up
NewGene_5257	NewGene_5257	5774	7860	4507	4062	6746	1822	3709	4686	4678	5153	53.3335	68.2328	43.6661	40.3404	63.3278	18.3128	33.357	43.6681	43.9482	49.2732	0.0334176	-0.665392	down
ENSMUSG00000039384	Dusp10	1637	2280	1644	1116	571	3418	2415	3496	1532	3121	14.9556	20.0852	15.6824	10.9082	5.2516	35.8383	21.9793	33.1777	14.5846	30.0734	0.00570883	0.848242	up
ENSMUSG00000006705	Pknox1	118	98	86	327	184	522	405	144	380	296	1.53496	1.21668	1.39943	2.50405	1.10873	3.49279	2.87569	1.93759	2.32037	1.83495	0.0207932	0.936712	up
ENSMUSG00000063564	Col23a1	65	86	38	44	23	117	112	82	77	61	0.287547	0.384011	0.177507	0.211115	0.117761	0.570227	0.483721	0.364944	0.349244	0.279169	0.0267152	0.678034	up
ENSMUSG00000039994	Timeless	214	145	280	212	54	546	262	222	277	291	1.23071	0.785566	1.7106	1.32113	0.307899	3.45129	1.47189	1.29737	1.63222	1.75392	0.0393722	0.71816	up
ENSMUSG00000036469	Marchf1	70	54	39	36	34	34	33	53	28	14	0.418212	0.305093	0.325083	0.243262	0.208558	0.223526	0.19321	0.319256	0.258305	0.085358	0.0396433	-0.67857	down
ENSMUSG00000019970	Sgk1	13704	22092	8243	12888	13834	11658	5542	9890	6423	7784	139.616	212.53	88.9258	142.495	143.016	130.013	54.6901	102.523	66.508	82.656	0.000635531	-0.928906	down
ENSMUSG00000054072	Iigp1	426	247	335	302	151	564	559	335	326	585	3.71965	2.00153	2.85908	2.98167	1.23948	5.14806	4.56402	2.90324	2.78356	5.24792	0.0207192	0.606779	up
ENSMUSG00000000320	Alox12	56	42	67	36	34	132	110	75	74	50	0.480563	0.336307	0.610464	0.323092	0.310395	1.28468	0.924602	0.658613	0.727625	0.447194	0.00852554	0.74645	up
ENSMUSG00000021773	Comtd1	251	210	212	183	481	141	225	182	189	215	2.99287	2.30162	2.57549	2.29565	5.616	1.79787	2.52895	2.26184	2.14222	2.64137	0.0426693	-0.687739	down
ENSMUSG00000040187	Arntl2	38	31	18	38	17	39	53	66	45	41	0.325476	0.24418	0.158457	0.354683	0.250467	0.632867	0.468191	0.681685	0.393623	0.367911	0.026568	0.654882	up
ENSMUSG00000020108	Ddit4	1794	6498	538	1801	6941	527	598	473	2137	354	25.8547	87.9257	8.16831	27.9937	101.828	8.28256	8.39012	6.8577	31.3781	5.29306	0.00280687	-2.3471	down
ENSMUSG00000078794	Dact3	79	80	60	66	32	99	124	106	145	101	0.665361	0.628963	0.52693	0.60069	0.268077	0.906077	1.02097	0.90207	1.25022	0.879968	0.00109317	0.742083	up
NewGene_6157	NewGene_6157	83	68	79	76	164	47	47	71	58	79	2.03112	1.56592	2.02601	2.00213	4.09678	1.26012	1.12604	1.75717	1.44843	2.02167	0.0285916	-0.817155	down
NewGene_3650	NewGene_3650	36	55	38	53	39	72	61	66	226	37	0.646475	0.828567	0.626612	1.01774	1.28819	1.26729	1.94065	1.04417	4.0093	0.688639	0.0415934	0.905159	up
ENSMUSG00000027889	Ampd2	164	124	165	156	94	314	277	275	164	204	1.13131	0.801697	1.2033	1.16133	0.661269	2.42131	1.86512	1.91588	1.15685	1.46457	0.000396518	0.671874	up
NewGene_10507	NewGene_10507	39	78	48	66	106	47	36	48	58	40	1.01251	1.92228	1.31699	1.89303	3.84731	1.83408	0.902195	1.24806	1.5395	1.09124	0.0365887	-0.754445	down
ENSMUSG00000024210	Ip6k3	1871	2130	2043	1957	1886	1142	1401	1295	1798	1404	20.2048	21.5931	23.2383	22.804	20.7268	13.4494	14.7325	14.0826	19.7872	15.7552	0.000188897	-0.631282	down
ENSMUSG00000021365	Nedd9	398	338	418	273	135	1111	390	535	412	409	2.06697	1.64239	2.40792	1.56267	0.709206	6.60032	2.0749	2.93706	2.2887	2.2034	0.0182111	0.744714	up
ENSMUSG00000026580	Selp	132	122	118	66	30	190	210	247	155	69	0.966905	0.837041	0.91044	0.517371	0.218188	1.5194	1.49855	1.82462	1.16159	0.520414	0.0332813	0.756247	up
ENSMUSG00000027188	Pamr1	321	200	173	155	91	402	258	445	539	124	2.83208	1.65635	1.60525	1.47153	0.816977	3.87273	2.21769	3.95865	4.84539	1.13314	0.0218635	0.782011	up
ENSMUSG00000021139	Gm20498	111	93	18	95	113	12	37	82	37	33	2.35668	1.63564	0.452046	2.15905	2.63355	0.295004	0.725874	1.75043	0.752927	0.738497	0.0153848	-1.26625	down
ENSMUSG00000020086	Macroh2a2	55	33	51	58	38	101	82	65	99	52	0.630427	0.353085	0.624148	0.720612	0.448487	1.27359	0.928056	0.753827	1.16677	0.618862	0.0125922	0.614851	up
ENSMUSG00000037892	Pcdh18	197	116	229	151	64	355	205	222	300	168	1.00063	0.530707	1.17783	0.79222	0.317434	1.89397	0.975081	1.11621	1.48993	0.849262	0.0359459	0.602306	up
ENSMUSG00000035258	Abi3bp	870	693	769	373	163	1303	739	1322	1232	505	4.8816	3.61236	4.37345	2.51104	0.807396	7.75313	4.179	7.70827	6.96541	3.04218	0.0428854	0.713701	up
NewGene_9455	NewGene_9455	127	136	89	149	122	63	76	66	97	85	2.02764	2.09903	1.59239	2.57738	2.32092	1.06532	1.16071	1.02932	1.51685	1.50761	0.000531548	-0.820993	down
ENSMUSG00000026473	Glul	28604	29696	11063	24201	50422	14001	27120	16226	23848	13296	259.398	252.71	105.758	237.011	465.188	139.056	239.543	148.193	220.395	125.384	0.0213777	-0.828803	down
ENSMUSG00000007659	Bcl2l1	1470	1606	858	1457	888	729	793	700	918	832	14.7222	15.6126	9.08979	15.5767	9.05218	8.19994	7.76963	7.15941	9.63613	8.89106	5.36101e-05	-0.773837	down
ENSMUSG00000023905	Tnfrsf12a	2006	2720	1130	961	1367	589	1100	793	1705	980	51.7161	66.3654	30.6387	26.7186	35.792	16.5023	27.7275	20.5315	44.8565	26.2393	0.0163833	-0.787518	down
ENSMUSG00000074794	Arrdc3	3291	6579	1386	3251	7023	1432	1411	1473	3761	1844	20.2981	38.0957	9.00608	21.6224	44.0875	9.64113	8.47813	9.14778	23.6292	11.8112	0.0169358	-1.30405	down
ENSMUSG00000021453	Gadd45g	4310	8592	1643	4824	9391	1812	1512	1887	3668	2251	101.823	190.522	40.8646	122.923	225.77	46.6963	34.7825	44.8871	88.2674	55.2552	0.00204001	-1.55349	down
ENSMUSG00000000317	Bcl6b	232	152	325	218	48	860	402	359	228	263	1.7431	1.0661	2.56779	1.76369	0.359832	7.06719	2.94028	2.71315	1.74278	2.05099	0.0160323	0.988073	up
ENSMUSG00000032352	Lrrc1	55	54	56	65	25	98	98	100	113	39	0.442433	0.405176	0.477035	0.567006	0.205534	0.860739	0.771327	0.81523	0.928731	0.320869	0.0182785	0.665888	up
ENSMUSG00000028996	Rbp7	444	291	338	265	696	198	339	259	289	262	18.125	11.1423	14.5284	11.6779	28.9172	8.78702	13.4642	10.6463	12.0069	11.0949	0.0133918	-0.793612	down
ENSMUSG00000024501	Dpysl3	243	311	258	228	148	553	270	470	494	281	1.12108	1.34539	1.2515	1.13459	0.693635	2.79927	1.21397	2.1813	2.32352	1.34537	0.00388263	0.660411	up
NewGene_7180	NewGene_7180	59	38	43	27	51	35	33	26	18	28	1.01708	0.625062	0.801928	0.516394	0.91855	0.660547	0.567474	0.449436	0.316812	0.507243	0.0144592	-0.79637	down
ENSMUSG00000033313	Fbxl8	23	15	38	28	18	50	45	55	47	47	0.302887	0.175234	0.532619	0.395481	0.232695	0.709964	0.579333	0.719513	0.621965	0.645834	0.00403873	0.86375	up
ENSMUSG00000011179	Odc1	20291	23507	19412	18784	43315	14696	15281	17169	14675	15978	240.946	263.357	243.614	240.978	526.07	188.926	176.746	205.205	177.72	200.164	0.0021822	-0.892062	down
ENSMUSG00000022676	Snai2	110	72	85	71	24	119	139	150	95	114	1.37249	0.835661	1.11504	0.954574	0.297953	1.62077	1.68445	1.89	1.20237	1.47708	0.0183257	0.667563	up
ENSMUSG00000073878	Gm13304	63	89	58	84	46	164	157	231	211	90	1.90248	2.50509	1.82223	2.70957	1.40397	5.39312	4.60371	7.0249	6.48112	2.80727	3.23074e-06	1.17279	up
ENSMUSG00000050288	Fzd2	94	88	87	96	41	204	110	145	143	79	0.643323	0.567046	0.630774	0.710804	0.285481	1.53206	0.735735	1.00822	0.999258	0.561473	0.0161138	0.607923	up
ENSMUSG00000026941	Mamdc4	36	9	16	23	17	34	44	44	43	23	0.224023	0.052155	0.106287	0.152398	0.108843	0.233449	0.270908	0.280872	0.272901	0.149246	0.0378401	0.755252	up
ENSMUSG00000048087	Gm4737	277	232	177	183	972	206	175	193	234	174	3.34382	2.63232	2.25098	2.37432	11.9494	2.70899	2.05751	2.34746	2.87326	2.17546	0.0143795	-1.18048	down
ENSMUSG00000026536	Ifi211	570	378	264	421	536	299	188	366	530	197	8.07376	5.02802	3.94103	6.42292	7.72443	4.61562	2.58577	5.22026	7.64801	2.90075	0.0462949	-0.624554	down
ENSMUSG00000021701	Plk2	545	421	777	618	187	979	977	921	698	748	4.92181	3.56789	7.38916	6.0175	1.71795	9.64549	8.59308	8.37314	6.42508	7.01808	0.0132559	0.647976	up
ENSMUSG00000021702	Thbs4	1621	2194	1553	1254	866	3532	2001	3995	8004	1623	12.8193	16.2894	12.9344	10.694	6.96609	30.4834	15.4142	31.8277	64.5029	13.336	0.000725655	1.21796	up
ENSMUSG00000020811	Wscd1	83	152	125	102	48	273	158	150	170	136	0.706212	1.24923	1.15581	0.97024	0.424045	2.62032	1.35659	1.32618	1.52541	1.20722	0.0186108	0.663178	up
ENSMUSG00000001493	Meox1	136	113	196	160	80	255	278	228	360	139	1.53517	1.20408	2.34157	1.95937	0.919676	3.15168	3.06453	2.59978	4.15372	1.63625	0.00376822	0.733427	up
ENSMUSG00000040274	Cdk6	91	77	54	38	44	128	113	125	71	71	0.199199	0.155977	0.135691	0.087714	0.096156	0.305912	0.241267	0.272716	0.154513	0.160004	0.026405	0.595535	up
ENSMUSG00000017830	Dhx58	44	32	26	43	20	58	66	57	62	44	0.451715	0.308514	0.278652	0.477575	0.208661	0.65365	0.673954	0.593442	0.660172	0.479213	0.00599146	0.666632	up
ENSMUSG00000055041	Commd5	206	88	136	46	176	205	287	212	316	379	5.0179	1.99608	3.4844	1.18445	4.3545	5.44274	6.81412	5.20287	7.8428	9.644	0.0123746	0.969259	up
ENSMUSG00000054675	Tmem119	83	66	77	79	37	125	106	176	84	96	0.935125	0.698911	0.909401	0.952021	0.416886	1.53799	1.15486	2.01739	0.957087	1.12234	0.0075978	0.650306	up
ENSMUSG00000034892	Rps29	2369	2471	2226	2361	4888	1557	2665	2009	2613	1736	153.668	150.444	152.064	165.196	322.697	110.148	168.369	131.254	172.679	117.039	0.0295847	-0.650369	down
ENSMUSG00000040606	Kazn	96	85	42	106	29	206	129	145	139	133	0.594192	0.452314	0.226016	0.670561	0.193094	1.43051	0.804159	0.885377	0.858747	0.864259	0.001268	0.966986	up
ENSMUSG00000026360	Rgs2	718	230	210	341	2606	471	662	252	224	147	6.2145	1.80448	1.8516	3.17488	22.6149	4.44539	5.46909	2.36076	1.93572	1.27908	0.0496133	-1.58541	down
ENSMUSG00000021290	Atp5mpl	3684	4043	3832	4144	8036	3049	3869	3368	3661	3598	252.25	258.256	276.752	308.964	559.52	228.174	256.505	231.899	257.101	258.295	0.0254215	-0.637434	down
ENSMUSG00000022844	Pdia5	145	113	85	128	48	150	229	195	180	143	2.02094	1.47069	1.24976	1.92563	0.67193	2.28329	3.10797	2.7402	2.55244	2.06895	0.00300989	0.672945	up
ENSMUSG00000070427	Il18bp	45	63	24	61	30	122	78	80	46	69	0.511765	0.724526	0.254126	0.993207	0.478185	1.64143	0.927842	0.904381	0.608033	0.814852	0.0371213	0.686976	up
ENSMUSG00000026676	Ccdc3	407	387	316	396	206	543	735	796	734	300	3.85309	3.43486	3.14606	4.04272	1.98585	5.61273	6.77934	7.5914	7.08402	2.95341	0.00102451	0.711501	up
ENSMUSG00000002769	Gnmt	156	599	220	315	283	230	183	157	229	259	3.81254	13.7305	5.66395	8.29867	7.02451	6.10763	4.34099	3.85415	5.68048	6.57038	0.0414887	-0.707402	down
NewGene_7153	NewGene_7153	53	131	78	32	150	50	24	47	49	49	1.14983	2.52488	1.54019	0.601069	2.87872	0.962426	0.434097	1.01156	0.958166	1.00563	0.00865747	-1.21651	down
ENSMUSG00000024986	Hhex	97	54	180	122	50	243	221	222	158	113	1.35592	0.701312	2.65757	1.84654	0.705478	3.71795	3.00926	3.13198	2.2516	1.64055	0.016108	0.778515	up
ENSMUSG00000031250	Tnmd	78	41	55	24	105	157	76	248	345	86	1.44608	0.711124	1.07347	0.472015	1.99058	3.19006	1.36831	4.66314	6.56617	1.6547	0.00467912	1.378	up
ENSMUSG00000028211	Trp53inp1	2405	2750	875	1547	1951	975	1282	1059	1661	933	11.2569	12.0814	4.31024	7.80925	9.29341	4.97918	5.84366	4.99024	7.91796	4.53532	0.00276088	-0.839531	down
ENSMUSG00000030862	Cpxm2	208	170	174	222	143	379	172	342	516	211	1.53064	1.30929	1.32228	1.73001	1.04591	2.98917	1.20939	2.49044	3.85248	1.73827	0.0119842	0.682069	up
ENSMUSG00000054293	P2ry10b	39	10	12	24	6	65	44	45	42	12	0.324719	0.07157	0.103715	0.2046	0.042801	0.580443	0.355046	0.374857	0.35297	0.10256	0.0333988	1.06804	up
ENSMUSG00000036144	Meox2	803	640	870	630	298	2013	1063	1279	1082	895	8.60665	6.43826	9.82153	7.27491	3.24245	23.5328	11.0997	13.8083	11.813	9.96271	0.000560296	0.838758	up
ENSMUSG00000038241	Cep250	142	125	93	139	59	317	164	223	116	116	0.447855	0.39432	0.308903	0.47206	0.188435	1.0941	0.518195	0.709044	0.373784	0.380919	0.0347261	0.606997	up
ENSMUSG00000021750	Fam107a	584	746	299	373	428	157	278	291	316	275	4.55012	5.52184	2.40936	3.23464	3.48886	1.29249	2.04854	2.33451	2.54143	2.28317	0.000272126	-1.01079	down
ENSMUSG00000004698	Hdac9	55	151	61	50	80	250	173	259	62	143	0.174505	0.747281	0.205754	0.171086	0.424338	1.3424	0.866853	1.30129	0.200459	0.80292	0.0165144	0.977273	up
ENSMUSG00000031765	Mt1	2822	2117	1266	1614	3447	1055	2882	1693	1576	891	129.241	90.2114	60.968	79.8883	160.661	52.8444	129.044	77.7338	72.1295	42.4404	0.0404205	-0.695285	down
ENSMUSG00000079511	Gm42688	898	879	798	1017	1701	207	1226	855	686	455	6.25689	5.75077	5.85596	7.64702	12.0711	1.57333	8.32791	6.00003	4.86684	3.29614	0.0314143	-0.850499	down
ENSMUSG00000053626	Tll1	45	20	22	38	16	77	57	64	84	13	0.233544	0.097846	0.119524	0.212368	0.085449	0.445782	0.290893	0.338435	0.453703	0.066924	0.0329844	0.915796	up
ENSMUSG00000024778	Fas	711	721	486	664	511	326	549	415	494	452	12.2527	11.267	8.41611	11.8164	8.70108	6.10062	9.25129	7.43161	8.35502	8.15496	0.000884298	-0.596863	down
ENSMUSG00000020905	Usp43	40	18	34	31	42	78	84	65	52	35	0.222062	0.09577	0.203028	0.186719	0.240939	0.481146	0.460531	0.369482	0.297599	0.206089	0.0194285	0.739592	up
ENSMUSG00000068036	Afdn	3333	2596	2611	2761	1070	5461	4397	3812	3081	3718	10.9128	8.79664	9.5092	10.1263	3.56259	22.9211	14.0448	12.6186	10.8552	12.6477	0.00408354	0.619126	up
ENSMUSG00000046169	Adamts6	71	66	28	56	29	103	83	110	107	62	0.234457	0.20078	0.096295	0.19534	0.096028	0.397823	0.288826	0.364142	0.415193	0.210416	0.00524198	0.766651	up
ENSMUSG00000022687	Boc	299	381	229	249	130	471	268	432	709	265	1.69421	2.03105	1.37022	1.52649	0.751099	2.92058	1.48301	2.47278	4.1055	1.56449	0.0380684	0.613528	up
ENSMUSG00000043467	Zbtb37	180	148	155	121	65	328	178	261	168	185	0.24089	0.195624	0.21851	0.175025	0.087832	0.493272	0.232804	0.355979	0.244975	0.267872	0.0118189	0.622796	up
ENSMUSG00000039084	Chad	59	85	151	29	64	161	58	525	820	25	0.8871	1.19037	2.38557	0.460285	0.979963	2.63551	0.836361	7.95171	12.5755	0.384386	0.0310713	1.84834	up
NewGene_10522	NewGene_10522	271	199	137	253	249	243	132	167	186	91	6.7695	4.66594	3.59322	6.83133	6.32283	6.63567	3.20115	4.18839	4.73642	2.35626	0.0206439	-0.61303	down
ENSMUSG00000094686	Ccl21a	130	190	161	196	101	406	361	770	894	167	3.75875	5.1774	4.91349	6.11784	2.97748	12.8672	10.2203	22.5341	26.4736	5.0311	1.0646e-05	1.5786	up
ENSMUSG00000096596	Gm10591	95	131	86	143	71	242	215	347	420	123	2.73902	3.55999	2.62884	4.48515	2.09334	7.66799	6.07975	10.1657	12.4403	3.70956	4.94188e-05	1.20379	up
ENSMUSG00000032925	Itgbl1	239	304	222	244	177	473	284	503	787	245	1.48204	1.7712	1.45055	1.63619	1.12059	3.21145	1.71712	3.24099	4.98512	1.5808	0.00428048	0.802136	up
ENSMUSG00000042485	Mustn1	2930	3347	1939	2288	4935	1846	1655	1568	2359	3012	59.9626	64.2988	41.7896	50.5088	102.787	41.2134	32.9845	32.3157	49.1874	64.0686	0.0314805	-0.720204	down
ENSMUSG00000024378	Stard4	264	217	249	219	63	467	334	307	242	292	1.30637	1.00826	1.29855	1.17254	0.316569	2.5769	1.61053	1.57998	1.22252	1.50291	0.0367344	0.594092	up
ENSMUSG00000051041	Olfml1	162	86	62	137	49	175	256	225	178	93	2.42852	1.20222	0.977945	2.21177	0.741832	2.85658	3.72516	3.39623	2.72365	1.42907	0.0106755	0.771292	up
NewGene_10027	NewGene_10027	101	79	88	94	44	152	136	111	121	144	1.46382	0.61786	0.763742	0.84053	0.36486	1.36381	1.09566	0.929661	1.01315	1.25097	0.00451279	0.599267	up
ENSMUSG00000020601	Trib2	926	767	1248	898	281	1739	1504	1320	1045	1264	5.57696	4.33679	7.92169	5.83538	1.72223	11.517	8.83036	8.01177	6.41392	7.91101	0.0201485	0.629606	up
ENSMUSG00000069920	B3gnt9	116	88	105	83	37	188	87	193	182	115	1.2396	0.824958	1.18284	0.897468	0.37433	2.19193	0.844253	2.09645	1.85465	1.28205	0.0131135	0.721245	up
ENSMUSG00000031849	Comp	36	127	130	55	56	185	52	495	774	21	0.372916	1.33174	1.42445	0.73159	0.59301	2.11159	0.524996	5.40398	8.50134	0.225425	0.0423836	1.73524	up
ENSMUSG00000068373	D430041D05Rik	28	28	57	26	4	191	54	113	27	99	0.053812	0.049414	0.114994	0.053431	0.006054	0.404353	0.101925	0.21962	0.051872	0.198253	0.00349679	1.65639	up
NewGene_10407	NewGene_10407	174	105	130	104	302	111	100	108	73	49	1.14549	0.647212	0.898653	0.733656	2.01743	0.796059	0.638156	0.713787	0.489347	0.334432	0.00241234	-1.12744	down
NewGene_6590	NewGene_6590	178	171	199	135	58	328	258	190	227	274	3.25302	2.93357	3.82178	2.64712	1.07299	6.52671	4.59467	3.49924	4.22501	5.20344	0.0111629	0.685541	up
ENSMUSG00000032332	Col12a1	98	97	90	88	76	254	107	214	283	74	0.214505	0.344659	0.207839	0.778624	0.666635	0.608588	0.227315	0.576554	0.939098	0.167661	0.00540937	0.886965	up
ENSMUSG00000032338	Hcn4	31	50	26	32	4	121	60	40	47	43	0.124899	0.192254	0.111483	0.141085	0.015432	0.541685	0.241266	0.164074	0.195336	0.18314	0.0372237	1.00545	up
ENSMUSG00000046743	Fat4	283	233	235	204	61	496	259	336	395	299	0.443187	0.343043	0.387423	0.344119	0.096829	0.849813	0.395332	0.530574	0.630673	0.486664	0.0155526	0.716596	up
ENSMUSG00000078670	Fam174b	42	49	25	38	16	105	101	56	97	23	0.388353	0.431017	0.243684	0.376916	0.148686	1.07203	0.92272	0.52546	0.926642	0.22037	0.00955077	1.01427	up
ENSMUSG00000028268	Gbp3	217	129	186	200	116	352	329	291	201	275	2.16293	1.14188	1.96176	2.05673	1.1059	3.77091	3.07462	2.86537	1.92915	2.73445	0.000844784	0.643934	up
ENSMUSG00000063415	Cyp26b1	343	393	360	354	82	1035	885	591	482	464	2.01707	2.17592	2.22611	2.24398	0.489423	6.58297	5.01872	3.47848	2.85527	2.83886	0.00101148	1.05051	up
ENSMUSG00000029471	Camkk2	50	107	154	107	93	257	194	196	142	103	0.543054	0.563723	0.894074	0.596118	0.586735	1.53501	1.06718	1.02449	0.768331	0.586731	0.0457069	0.613001	up
ENSMUSG00000044338	Aplnr	292	109	378	264	57	701	490	408	307	303	1.99327	0.697254	2.71967	1.9457	0.389853	5.22895	3.26213	2.80892	2.13287	2.15319	0.0221553	0.88944	up
NewGene_711	NewGene_711	196	170	259	145	117	397	220	509	232	290	0.911425	0.759658	1.27025	0.759431	0.529	2.00642	0.999658	2.45672	1.11762	1.41631	0.00482449	0.75867	up
ENSMUSG00000036502	Tmem255a	42	32	8	37	34	74	58	68	60	60	0.311962	0.2225	0.112652	0.296607	0.252098	0.596435	0.421393	0.505158	0.455802	0.464	0.00998729	0.920943	up
ENSMUSG00000063382	Bcl9l	549	449	278	466	112	937	651	789	435	427	2.05166	1.57237	1.28298	1.93767	0.49899	4.0445	2.43032	3.16778	1.65015	1.65606	0.0273725	0.693185	up
ENSMUSG00000063383	Zfp947	39	17	17	31	16	36	44	39	43	41	0.340125	0.137654	0.151992	0.288696	0.142726	0.338292	0.375852	0.339458	0.382186	0.370843	0.0389094	0.645165	up
ENSMUSG00000031517	Gpm6a	126	109	65	103	62	158	179	182	205	106	0.985597	0.797986	0.53349	0.870407	0.490883	1.35544	1.36872	1.43775	1.64121	0.865981	0.000929582	0.698913	up
ENSMUSG00000040254	Sema3d	74	51	33	49	10	89	66	89	139	66	0.293556	0.189857	0.13896	0.210796	0.039219	0.389085	0.257507	0.358312	0.564061	0.27187	0.0125479	0.963824	up
ENSMUSG00000036334	Igsf10	44	53	48	48	25	110	81	114	100	57	0.109946	0.123085	0.126144	0.129401	0.063647	0.298991	0.196417	0.287284	0.255444	0.146243	7.58629e-05	0.938586	up
ENSMUSG00000021319	Sfrp4	46	38	36	30	14	193	100	102	32	51	0.524303	0.322662	0.529166	0.351965	0.194522	2.71482	1.34295	1.19816	0.426079	0.431985	0.00116158	1.39625	up
ENSMUSG00000028341	Nr4a3	197	102	2429	183	598	147	117	58	102	52	0.868153	0.421171	11.3132	0.869437	2.68819	0.706992	0.503468	0.256983	0.45925	0.234496	0.000218086	-3.09078	down
ENSMUSG00000049866	Arl4c	47	18	22	16	16	57	26	55	54	35	0.29588	0.105287	0.145394	0.109251	0.099291	0.389152	0.153403	0.348466	0.347223	0.229714	0.0304312	0.815565	up
ENSMUSG00000024998	Plce1	197	134	174	153	58	338	236	252	245	184	0.547164	0.336497	0.489194	0.441656	0.15736	0.98688	0.61429	0.680102	0.667761	0.510475	0.00346712	0.692145	up
ENSMUSG00000026594	Ralgps2	89	55	38	57	17	98	98	103	98	70	0.324497	0.18834	0.1437	0.223465	0.063529	0.3872	0.355148	0.38917	0.430415	0.272266	0.0109693	0.764455	up
ENSMUSG00000015134	Aldh1a3	88	64	95	66	15	195	77	189	118	57	0.658831	0.440721	0.744432	0.55537	0.111578	1.7229	0.548968	1.58631	1.03622	0.445293	0.0460177	0.8295	up
NewGene_3567	NewGene_3567	114	214	198	198	366	116	134	138	145	201	2.00345	3.52135	3.65708	3.74745	6.53888	2.22041	2.28365	2.43623	2.5889	3.66075	0.0383076	-0.751227	down
ENSMUSG00000021905	Dph3	1528	1572	1855	1859	3791	1408	1835	1607	1570	1556	13.336	13.3491	17.5588	18.2639	35.9191	13.4536	15.6377	14.1547	14.33	16.4612	0.040437	-0.625531	down
ENSMUSG00000027996	Sfrp2	39	6	40	28	56	96	95	128	68	32	0.490298	0.062682	0.528558	0.377249	0.719783	1.31517	1.15739	1.62312	0.868062	0.417528	0.0297048	1.07485	up
ENSMUSG00000057722	Lepr	199	215	146	180	92	346	231	401	684	90	0.901977	0.920478	0.701553	0.883181	0.425946	1.72253	1.02385	1.85662	3.18696	0.423454	0.0169946	0.928522	up
ENSMUSG00000052468	Pmp2	57	47	23	68	5	146	83	62	38	100	1.02012	0.785674	0.434193	1.30088	0.085096	2.85815	1.44439	1.10806	0.689997	1.86582	0.0456952	1.0339	up
ENSMUSG00000046318	Ccbe1	107	93	114	89	57	236	90	232	303	116	0.411131	0.333035	0.458678	0.368547	0.222639	0.98879	0.33725	0.89568	1.18729	0.463137	0.00265276	0.95192	up
ENSMUSG00000070796	Psg21	2	68	154	42	81	8	11	46	46	23	0.02196	0.778113	1.96094	0.549818	0.997293	0.102918	0.12873	0.555365	0.557761	0.288206	0.0396755	-1.55948	down
ENSMUSG00000000049	Apoh	41	76	148	59	155	30	70	49	50	40	0.865382	1.50557	3.31068	1.33021	3.43073	0.720461	1.50572	1.07167	1.13155	0.86658	0.0049213	-1.22597	down
ENSMUSG00000022094	Slc39a14	690	1136	457	573	1128	589	465	554	793	432	3.57153	5.59155	2.51632	3.23677	6.03181	3.36762	2.35257	2.85465	4.19079	2.30329	0.0258859	-0.682894	down
ENSMUSG00000037921	Ddx60	89	44	47	37	30	88	92	106	69	76	0.342966	0.159514	0.189762	0.150347	0.114629	0.368978	0.346688	0.408113	0.271559	0.304819	0.0102118	0.685629	up
ENSMUSG00000036339	Tmem260	132	78	101	102	125	94	402	357	147	90	0.819956	0.459506	0.933026	0.743023	0.684774	0.528998	2.01503	1.86115	1.31787	0.800906	0.0416393	0.812576	up
ENSMUSG00000028967	Errfi1	2537	3667	1905	1934	3019	1690	1516	1244	2534	1111	21.1007	28.6109	16.688	17.3366	25.5321	15.3212	12.2696	10.4134	21.4647	9.59829	0.00121189	-0.864628	down
ENSMUSG00000036437	Npy1r	443	532	214	347	191	321	157	170	265	144	3.73524	4.23303	2.05334	3.15477	1.63852	2.96871	1.39192	1.55692	2.26766	1.35935	0.00455776	-0.832548	down

## Sheet: Model_vs_H-YP.DEG  DESeq2
Supplementary Table 2: Model_vs_H-YP.DEG DESeq2
#ID	Symbol	B4_Count	B3_Count	B2_Count	B1_Count	B5_Count	D4_Count	D3_Count	D2_Count	D1_Count	D5_Count	B4_FPKM	B3_FPKM	B2_FPKM	B1_FPKM	B5_FPKM	D4_FPKM	D3_FPKM	D2_FPKM	D1_FPKM	D5_FPKM	Pvalue	log2FC	regulated
ENSMUSG00000004446	Bid	96	29	43	92	39	108	255	44	264	66	1.10926	0.31405	0.516679	1.14139	0.451367	1.24112	3.13453	0.525137	3.12835	0.793505	0.014736	1.20688	up
ENSMUSG00000098557	Kctd12	964	614	774	700	486	1158	1679	748	1368	834	4.02637	2.40548	3.40273	3.15406	2.06337	4.82813	7.47523	3.25817	5.86417	3.65771	0.00385162	0.631642	up
ENSMUSG00000033863	Klf9	17684	22653	13144	14741	11571	10045	8454	9112	11845	14050	99.7384	119.923	78.0807	89.6778	66.4082	56.5722	50.8242	53.5971	68.5651	83.2209	0.000288998	-0.659855	down
ENSMUSG00000031402	Mpp1	1276	633	553	742	821	1066	2138	747	2491	805	12.8227	6.0608	5.985	8.06019	8.53534	10.7402	22.9416	7.85517	25.929	8.51467	0.0281263	0.735221	up
ENSMUSG00000029368	Alb	188	4	2440	102	1802	119	160	18	363	17	2.33124	0.046704	31.9654	1.35736	22.8077	1.47789	2.11274	0.230508	4.62878	0.212514	0.019475	-3.02127	down
ENSMUSG00000019932	Kera	58	45	59	68	99	133	209	215	83	385	0.635888	0.463592	0.684086	0.810067	1.10898	1.4667	2.46796	2.47976	0.93737	4.47878	0.000319177	1.51928	up
ENSMUSG00000054723	Vmac	264	186	120	258	142	213	401	200	544	288	3.06377	2.15669	1.45306	3.15319	1.8336	2.56534	5.42893	2.36256	6.62124	3.73741	0.0204863	0.668567	up
ENSMUSG00000054720	Lrrc8c	1364	1553	1273	1331	447	643	515	592	660	713	4.98481	5.28665	4.85997	5.24563	1.64885	2.32756	1.98903	2.2367	2.45515	2.7141	4.96997e-05	-0.982682	down
ENSMUSG00000019066	Rab3d	648	247	324	494	451	693	1015	312	1932	447	4.28357	1.507	2.2458	3.51513	3.02555	4.55167	7.13439	2.14368	13.1547	3.0959	0.0277747	0.886169	up
ENSMUSG00000028883	Sema3a	53	41	64	56	25	72	107	111	45	86	0.224208	0.161691	0.284802	0.254666	0.107971	0.303037	0.48268	0.492633	0.192771	0.381939	0.0269274	0.783772	up
ENSMUSG00000034987	Hrh2	74	11	22	21	14	67	91	33	70	46	0.500922	0.066016	0.132985	0.130369	0.085969	0.448478	0.681115	0.244746	0.466097	0.312154	0.0295127	1.07647	up
ENSMUSG00000046186	Cd109	51	60	58	47	16	55	333	47	65	149	0.216667	0.241921	0.259311	0.215232	0.067402	0.235015	1.53088	0.211596	0.287071	0.671185	0.00837495	1.41757	up
NewGene_2039	NewGene_2039	102	125	103	140	150	91	51	52	140	100	1.93661	2.56975	2.24388	3.0582	2.91311	1.77646	0.994306	1.06524	2.71285	1.99323	0.0333998	-0.658965	down
ENSMUSG00000051726	Kcnf1	93	327	108	214	153	131	43	62	61	84	0.486639	1.62039	0.599993	1.21889	0.817231	0.687553	0.240664	0.338083	0.327412	0.462395	0.00117781	-1.32948	down
ENSMUSG00000026548	Slamf9	40	26	11	34	31	123	74	24	78	63	0.769155	0.458339	0.208245	0.686358	0.59092	2.34754	1.50211	0.480298	1.53444	1.25815	0.00534599	1.23827	up
ENSMUSG00000002059	Rab34	738	231	206	508	495	715	1207	271	2045	440	11.9084	3.87771	3.37317	8.8626	7.71424	10.8403	19.4997	4.49964	33.2251	7.42608	0.038566	0.963699	up
ENSMUSG00000002058	Unc119	204	121	127	180	179	295	479	189	452	199	3.8558	2.15808	2.53232	3.68633	3.45582	5.6034	9.7167	3.74655	8.76714	3.92428	0.00295424	0.877728	up
ENSMUSG00000001507	Itga3	160	177	193	122	82	44	89	102	122	139	0.82977	0.860521	1.05491	0.682838	0.429577	0.226748	0.488329	0.549396	0.646798	0.75546	0.0435301	-0.637762	down
NewGene_2770	NewGene_2770	74	36	48	76	56	19	31	25	54	47	0.631568	0.283361	0.426801	0.703752	0.642637	0.156703	0.275671	0.218131	0.476015	0.583416	0.0188414	-0.828205	down
ENSMUSG00000020061	Mybpc1	16991	27253	12904	18070	22227	8285	14681	7016	13673	13921	113.435	170.167	90.0847	129.493	150.105	54.6474	102.786	48.1034	93.6301	97.5185	0.000559012	-0.892234	down
ENSMUSG00000030967	Zranb1	3971	5898	3891	3926	4103	2869	2434	2575	2955	4201	20.4168	28.1733	20.9995	21.6644	21.5749	14.6446	13.1032	13.6626	15.4369	22.6986	0.0009361	-0.638208	down
ENSMUSG00000004105	Angptl2	2096	1029	1614	1641	675	2166	2790	1520	6026	2362	15.8822	7.31755	12.8739	13.4034	5.20006	16.3884	22.534	12.0099	46.8658	18.7913	0.00206047	0.985143	up
ENSMUSG00000000957	Mmp14	419	317	194	190	76	88	157	110	154	232	4.05706	2.89369	1.98593	1.99145	0.723063	0.838043	1.55968	1.12641	1.53743	2.37471	0.0436192	-0.733156	down
ENSMUSG00000022357	Klhl38	2260	4481	1619	2993	2959	2189	970	1467	1362	2612	25.8493	48.1004	19.5017	36.9227	34.4422	24.9959	11.8153	17.4945	15.9853	31.3779	0.00825938	-0.841526	down
ENSMUSG00000022358	Fbxo32	34892	76544	21244	29804	38681	25716	12290	18423	17827	31547	126.555	260.585	81.155	116.6	142.767	93.1342	47.5117	69.691	66.3587	120.165	0.00249985	-1.02821	down
ENSMUSG00000032420	Nt5e	133	113	94	112	44	122	267	147	205	185	0.83788	0.667231	0.62456	0.76368	0.282682	0.768087	1.79907	0.97063	1.32652	1.22992	0.00219811	0.842885	up
ENSMUSG00000058099	Nfam1	56	46	42	38	34	83	426	9	46	87	0.184989	0.141776	0.145658	0.135186	0.112045	0.27233	1.50209	0.028623	0.1543	0.302534	0.0280668	1.4974	up
NewGene_1956	NewGene_1956	78	56	108	72	29	167	146	215	79	109	0.814496	0.553253	1.25474	0.811735	0.301079	1.76849	1.59289	2.36794	0.902357	1.25619	0.00630962	1.04918	up
ENSMUSG00000057457	Phex	13	2	40	23	6	52	90	58	30	38	0.085846	0.012047	0.174221	0.172161	0.038082	0.363107	0.669403	0.338909	0.216645	0.217909	0.0101547	1.63232	up
ENSMUSG00000015340	Cybb	172	171	126	124	115	383	1223	50	219	297	0.910749	0.850473	0.706433	0.710102	0.618635	2.03331	6.93951	0.274853	1.19157	1.6604	0.00607947	1.5174	up
ENSMUSG00000112023	Lilr4b	81	36	31	26	10	78	199	33	54	59	1.10518	0.459762	0.439516	0.375804	0.129255	1.07143	4.76098	0.4709	1.09696	0.840402	0.0306131	1.17647	up
ENSMUSG00000001156	Mxd1	298	244	259	254	148	237	825	230	452	307	1.61416	1.23686	1.47269	1.48132	0.814383	1.27944	4.76368	1.29885	2.51203	1.74529	0.0361058	0.689952	up
ENSMUSG00000015354	Pcolce2	671	667	496	488	379	1709	1062	518	756	1226	3.825	3.56569	2.97508	2.99554	2.19699	9.7287	6.44796	3.07584	4.41834	7.33531	0.00120847	0.881693	up
ENSMUSG00000015355	Cd48	60	58	33	37	79	166	290	31	78	104	1.27266	1.14446	0.786548	0.838556	1.88747	3.53304	6.58785	0.809264	1.69605	2.32494	0.020885	1.18207	up
ENSMUSG00000037035	Inhbb	128	104	100	143	41	247	279	66	330	134	0.756553	0.575111	0.625771	0.916838	0.247174	1.464	1.76284	0.404369	2.01234	0.832597	0.0143771	0.94818	up
ENSMUSG00000030022	Adamts9	617	344	494	452	161	166	254	177	393	191	1.94663	1.01855	1.63959	1.5366	0.514495	0.521994	0.852152	0.581441	1.27036	0.631548	0.0037569	-0.870036	down
ENSMUSG00000022436	Sh3bp1	60	32	17	16	28	70	108	22	80	111	0.703819	0.314634	0.183428	0.175597	0.304446	0.796812	1.21779	0.267671	0.872831	1.23496	0.00677969	1.25361	up
ENSMUSG00000020492	Ska2	117	119	142	119	38	169	276	197	177	152	0.974185	0.930019	1.24254	1.06551	0.314483	1.39771	2.4423	1.71046	1.50521	1.32599	0.00752983	0.818653	up
ENSMUSG00000039081	Zfp503	574	272	443	453	313	1071	978	387	1236	748	3.44398	1.53137	2.79948	2.93158	1.90758	6.41355	6.25479	2.41703	7.60702	4.70972	0.000137932	1.00526	up
ENSMUSG00000073982	Rhog	502	398	467	520	388	666	1287	520	708	620	9.99399	7.43088	9.79605	11.1826	7.83687	13.2467	27.3418	10.8124	14.4777	12.9782	0.00528783	0.651274	up
ENSMUSG00000047045	Tmem164	176	136	131	145	81	215	301	130	330	197	0.849611	0.621306	0.678659	0.757431	0.394831	1.03681	1.55119	0.652091	1.65867	1.00008	0.0024525	0.72409	up
ENSMUSG00000003038	Hmgn2	1068	784	855	1123	921	2022	4131	1195	1637	1142	27.7763	14.7663	18.2401	24.2603	24.5746	40.5894	88.5314	25.0755	33.8645	24.0766	0.00194592	0.99787	up
ENSMUSG00000054641	Mmrn1	82	137	55	90	50	312	475	201	304	355	0.458843	0.724853	0.321836	0.543243	0.286257	1.7592	2.85299	1.18046	1.76051	2.10234	4.36004e-11	1.9102	up
ENSMUSG00000054640	Slc8a1	1427	1330	1844	1703	682	869	831	984	695	1162	2.07628	1.83095	2.76495	2.53503	0.968046	1.20903	1.21342	1.41288	1.03879	1.83034	0.00498623	-0.66975	down
ENSMUSG00000023087	Noct	933	627	961	1064	809	540	741	463	681	553	5.42372	4.07672	7.81718	8.98156	6.44391	3.95912	6.11715	2.87361	5.15466	4.65829	0.000224298	-0.658678	down
ENSMUSG00000030786	Itgam	96	89	52	56	52	173	784	30	51	128	0.515738	0.446754	0.295848	0.326115	0.281607	0.929219	4.52372	0.168414	0.282665	0.72265	0.0113718	1.67701	up
ENSMUSG00000030787	Lyve1	289	441	253	236	313	780	980	253	294	785	2.52201	3.61568	2.32302	2.21922	2.77863	6.80945	9.13475	2.30095	2.63808	7.20197	0.0140107	0.898661	up
ENSMUSG00000031785	Adgrg1	2362	2144	1696	1922	1157	1016	789	1051	1816	1299	16.7298	14.237	12.6402	14.648	8.32734	7.1752	5.88265	7.75963	13.183	9.67498	0.000485152	-0.713791	down
NewGene_11027	NewGene_11027	41	27	24	27	32	62	90	64	81	35	1.95624	1.16982	1.16353	1.38006	1.54359	2.91357	4.57482	3.14662	3.93161	1.7269	0.00186167	1.05228	up
ENSMUSG00000026821	Ralgds	531	368	408	472	231	555	627	547	989	781	3.71827	2.44773	3.05224	3.51342	1.61032	3.80309	4.59005	3.91695	7.14098	5.71174	0.000134752	0.724142	up
ENSMUSG00000006369	Fbln1	241	174	145	311	184	392	448	328	260	466	2.20406	1.29928	1.32377	2.96074	1.48163	3.08323	3.78271	2.65025	2.19439	4.17688	0.00193612	0.768856	up
ENSMUSG00000044250	Pced1b	53	48	47	44	15	69	83	45	94	61	0.680555	0.514834	0.604564	0.544511	0.168198	0.79039	1.04274	0.53485	1.34881	1.07768	0.0256534	0.696496	up
ENSMUSG00000032584	Mst1r	66	32	34	50	39	98	170	15	163	96	0.350814	0.160875	0.188857	0.286832	0.208915	0.52233	0.969805	0.080923	0.891761	0.538099	0.0141506	1.17222	up
ENSMUSG00000041417	Pik3r1	1900	2075	1322	1726	1303	2635	2668	1287	5467	2095	6.84557	6.92673	4.9509	6.62086	4.83975	9.35879	10.1132	4.85576	19.9969	7.84705	0.021588	0.644205	up
ENSMUSG00000031376	Atp2b3	113	146	137	120	86	70	60	66	61	131	0.655545	0.819887	0.840082	0.712857	0.502005	0.386404	0.345369	0.403037	0.33975	0.808131	0.00840394	-0.719148	down
ENSMUSG00000038351	Sgsm2	86	45	67	80	33	100	140	49	124	114	0.441508	0.217135	0.371511	0.445703	0.174296	0.515633	0.770208	0.263227	0.656965	0.631032	0.0264905	0.680524	up
ENSMUSG00000018654	Ikzf1	56	25	33	48	23	119	480	13	85	49	0.269963	0.111347	0.170197	0.251231	0.112641	0.577623	2.50297	0.06171	0.423737	0.247184	0.0043114	1.93815	up
ENSMUSG00000021423	Ly86	64	40	27	23	31	137	115	37	56	61	1.40628	0.81858	0.616342	0.549053	0.682228	3.0303	2.71355	0.849086	1.26713	1.41769	0.011723	1.05923	up
ENSMUSG00000060216	Arrb2	179	192	152	207	238	302	633	206	245	274	2.44121	2.47406	2.26502	3.07842	3.36369	4.19633	9.40091	2.97517	3.49689	3.96204	0.0400117	0.660671	up
ENSMUSG00000024413	Npc1	6143	7370	4367	5554	5223	3913	2345	2920	3995	4556	29.7515	33.5016	22.275	29.0121	25.7419	18.9223	12.1034	14.7472	19.8571	23.1738	5.28298e-05	-0.791302	down
ENSMUSG00000032942	Ucp3	13309	14735	8709	7495	12906	3823	2430	5616	5262	5555	137.559	142.981	94.8071	83.5573	135.74	39.4549	26.7719	60.5332	55.8136	60.2946	5.85769e-07	-1.4257	down
ENSMUSG00000034041	Lyl1	137	83	113	103	74	269	305	143	145	207	1.96987	1.10182	1.70152	1.57458	1.10925	3.66003	4.85399	2.20265	2.1516	2.94751	0.00017564	0.996911	up
ENSMUSG00000073125	Xlr3b	53	29	35	25	23	122	59	30	79	87	0.855371	0.431501	0.582919	0.4209	0.36279	1.9652	1.00318	0.490499	1.30916	1.47137	0.00319708	1.10421	up
ENSMUSG00000046688	Tifa	100	58	104	72	66	167	129	96	81	190	1.09762	0.575946	1.07889	0.865083	0.747633	1.70964	1.47497	1.26651	0.81952	2.15295	0.0280549	0.646289	up
ENSMUSG00000004814	Ccl24	71	58	63	139	67	331	151	52	99	230	1.47047	1.05902	1.37905	3.21682	1.32936	6.45533	3.28563	1.05551	1.9716	4.83865	0.0221658	1.01196	up
ENSMUSG00000032558	Nphp3	97	69	64	50	35	72	136	100	153	107	0.413227	0.274515	0.287233	0.229077	0.149597	0.304801	0.621708	0.444074	0.667364	0.47958	0.00509585	0.786029	up
ENSMUSG00000024352	Spata24	62	86	77	56	78	123	166	114	84	113	2.19026	2.89515	2.86206	2.12151	2.78673	4.36142	6.28622	4.23037	3.06161	4.22012	0.0220269	0.646275	up
ENSMUSG00000016637	Ift27	594	763	548	464	441	1185	886	1228	587	1007	14.8161	17.8863	14.4128	12.4978	11.1989	29.5471	23.5785	31.9838	15.0194	26.3969	0.00350372	0.747504	up
ENSMUSG00000030707	Coro1a	152	105	88	131	99	510	1633	90	282	199	2.23021	1.42586	1.41061	2.14413	1.55475	7.75439	26.5293	1.34924	4.40984	3.18538	0.000146464	2.14769	up
ENSMUSG00000039629	Strip2	71	14	22	49	30	40	80	25	348	32	0.330406	0.061621	0.108451	0.250225	0.141575	0.1849	0.400925	0.118466	1.68979	0.157293	0.0431546	1.35568	up
ENSMUSG00000055003	Lrtm2	60	39	35	73	70	180	106	106	39	111	0.416769	0.228487	0.230719	0.565026	0.49321	1.13418	0.713783	0.693957	0.246855	0.826051	0.0351325	0.882778	up
ENSMUSG00000020593	Lpin1	20056	19607	17061	15691	17033	10920	8145	8194	14340	15104	93.0289	85.5684	83.3477	78.5916	80.474	50.593	39.3599	39.6836	68.2879	73.8151	1.18522e-05	-0.768999	down
ENSMUSG00000028036	Ptgfr	160	141	108	125	95	301	170	172	183	196	0.61895	0.520955	0.436148	0.570445	0.384407	1.15461	0.689193	0.691459	0.914199	0.796169	0.00396645	0.629307	up
ENSMUSG00000028033	Kcnq5	243	303	251	243	132	109	128	131	131	264	0.877016	1.03451	0.954899	0.950798	0.487129	0.391488	0.493732	0.493612	0.515306	1.04502	0.0112155	-0.693029	down
ENSMUSG00000032392	Parp16	210	111	183	156	106	316	340	229	519	281	2.12232	1.0422	1.92155	1.70623	1.0986	3.16395	3.6402	2.39943	5.34398	2.95644	4.58063e-06	1.04846	up
ENSMUSG00000026088	Mitd1	85	79	71	80	58	101	223	91	168	99	1.74589	1.50943	1.52826	1.7523	1.19586	2.05663	4.88172	1.94094	3.52791	2.12796	0.00534561	0.779931	up
ENSMUSG00000004609	Cd33	67	105	56	46	46	100	632	23	52	133	0.295105	0.465006	0.257316	0.232656	0.20324	0.444838	3.00819	0.104489	0.241211	0.679917	0.0283548	1.46109	up
ENSMUSG00000028957	Per3	615	395	557	569	255	928	1391	677	1877	1179	2.59984	1.58	2.47174	2.58871	1.09496	3.92392	6.2554	2.98641	8.16863	5.25527	3.5944e-07	1.25257	up
ENSMUSG00000017692	Rhbdl3	162	117	216	153	136	373	203	300	218	317	1.09269	0.742771	1.5403	1.11119	0.931877	2.51657	1.46187	2.112	1.50871	2.24884	0.0026785	0.772352	up
ENSMUSG00000067279	Ppp1r3c	4203	7155	5168	6148	10428	6744	2347	4332	4218	3669	39.0221	62.3499	50.5324	61.5717	98.5286	62.52	23.223	41.9465	40.1941	35.7696	0.0236527	-0.774153	down
ENSMUSG00000047443	Erfe	97	28	41	58	41	16	32	10	48	20	0.8655	0.251717	0.379853	0.564909	0.370082	0.138707	0.299657	0.088895	0.434434	0.18301	0.00987027	-1.16932	down
ENSMUSG00000057137	Tmem140	5221	8251	5547	6114	5102	2645	2286	1894	3028	4549	55.4347	78.8247	59.864	69.0668	52.8022	26.4819	24.7097	20.4933	32.9902	50.4276	7.80545e-08	-1.18132	down
ENSMUSG00000036186	Dipk1b	96	90	77	78	54	120	139	74	320	76	1.48845	1.30547	1.26096	1.30796	0.843032	1.86443	2.29859	1.18769	5.12175	1.23397	0.0355626	0.770214	up
ENSMUSG00000033355	Rtp4	196	89	131	163	110	274	458	156	270	221	3.27275	1.32772	3.03468	2.8562	1.93264	4.38835	10.5404	2.61579	4.39104	4.13212	0.00143338	0.918838	up
ENSMUSG00000036452	Arhgap26	458	368	773	431	549	286	350	231	579	244	1.63456	1.1052	2.64025	1.48786	1.99037	0.913755	1.19356	0.869984	1.93934	0.860935	0.0102552	-0.744425	down
ENSMUSG00000026786	Apbb1ip	128	123	70	107	119	299	293	131	212	148	1.16028	1.04497	0.669109	1.05291	1.10415	2.72138	2.84104	1.24099	1.98127	1.41179	0.0025619	0.881407	up
ENSMUSG00000030878	Cdr2	219	206	183	167	90	306	607	241	260	234	2.193	1.92939	1.92454	1.79945	0.915241	3.06181	6.48233	2.51694	2.67007	2.45327	0.00399778	0.874668	up
ENSMUSG00000026430	Rassf5	64	44	28	39	18	83	302	17	92	30	0.461842	0.293042	0.213981	0.302752	0.12735	0.602399	2.33427	0.122924	0.687383	0.226248	0.028012	1.37757	up
ENSMUSG00000015405	Ace2	92	82	72	102	10	22	4	17	32	45	0.750457	0.599213	0.555002	0.772999	0.06587	0.151392	0.025327	0.120417	0.229492	0.332124	0.00581787	-1.63029	down
ENSMUSG00000019577	Pdk4	54216	107754	19287	35521	71783	13849	10169	19453	22560	18740	393.817	734.546	147.542	278.29	530.497	100.456	78.7165	147.345	168.154	142.923	1.71085e-06	-1.88065	down
ENSMUSG00000045180	Shroom2	112	127	78	107	65	31	85	17	72	86	0.3759	0.399725	0.274439	0.386111	0.222482	0.1015	0.304327	0.058573	0.249081	0.301637	0.0282642	-0.857662	down
ENSMUSG00000071497	Nutf2-ps1	267	93	491	217	160	151	115	180	113	113	7.49213	2.4362	14.4998	6.56611	4.56056	4.21926	3.42156	5.25254	3.25465	3.32619	0.0193792	-0.917701	down
NewGene_2042	NewGene_2042	52	70	73	60	52	31	36	21	33	59	1.40532	1.78784	2.09025	1.7616	1.44555	0.835763	1.0427	0.590061	0.916743	1.69824	0.0042731	-0.87887	down
ENSMUSG00000054932	Afp	61	51	394	273	114	14	28	4	4	47	0.746601	0.576208	5.08217	3.60879	1.42266	0.167371	0.354029	0.042383	0.043889	0.594831	1.6304e-06	-3.32748	down
ENSMUSG00000031431	Tsc22d3	17041	21336	17723	15167	23995	14712	10158	17502	9840	15103	221.947	260.56	242.724	215.246	315.802	190.707	141.316	237.318	132.941	207.21	0.0247314	-0.594558	down
ENSMUSG00000025597	Klhl4	136	90	116	123	79	178	399	147	216	230	0.957027	0.591737	0.849625	0.936323	0.559384	1.25263	2.99917	1.0728	1.57219	1.7025	0.000149164	1.02311	up
ENSMUSG00000035849	Krt222	41	27	45	47	30	91	71	66	71	86	0.331489	0.205897	0.388873	0.415365	0.251112	0.747146	0.6155	0.563926	0.671747	0.747317	0.000214931	0.937688	up
ENSMUSG00000025044	Msr1	68	31	33	26	31	95	286	10	59	64	0.513772	0.20572	0.240502	0.218407	0.21589	0.655202	2.11238	0.065707	0.450432	0.603559	0.0299527	1.3578	up
ENSMUSG00000041559	Fmod	968	985	1514	950	910	3091	2744	3683	1749	6579	7.84502	7.4958	12.9258	8.30545	7.50289	25.0253	23.7167	31.1469	14.5519	56.0286	1.62482e-07	1.66102	up
ENSMUSG00000030428	Ttyh1	170	96	76	73	84	56	26	50	95	49	1.32526	0.628276	0.656546	0.569946	0.552002	0.421911	0.156724	0.296939	0.751476	0.294224	0.00729792	-0.936235	down
ENSMUSG00000031778	Cx3cl1	132	139	160	102	27	28	39	55	79	108	1.00161	0.991225	1.29021	0.831039	0.205519	0.206743	0.312907	0.430935	0.611649	0.861502	0.0393742	-0.917073	down
ENSMUSG00000030798	Cd37	87	37	37	35	55	111	274	36	70	74	1.34733	0.571958	0.566078	0.650991	0.649428	2.07245	5.08989	0.727869	0.957481	1.26669	0.0318339	1.07488	up
ENSMUSG00000035105	Egln3	1268	2306	1057	1039	2546	450	871	708	773	769	12.0457	20.57	10.5721	10.65	24.6239	4.26865	8.82315	7.01716	7.53543	7.67147	5.75386e-05	-1.34419	down
ENSMUSG00000042487	Leo1	599	495	509	650	337	316	187	338	337	471	6.94758	5.38195	6.21116	8.13069	3.97348	3.65511	2.30916	4.08149	4.00981	5.73372	0.00205683	-0.717484	down
ENSMUSG00000001763	Tspan33	39	54	43	36	55	87	290	80	48	45	0.49175	0.633158	0.574246	0.485286	0.704609	1.095	3.91835	1.05271	0.620951	0.597824	0.0226751	1.17568	up
ENSMUSG00000052305	Hbb-bs	10314	13262	12166	8386	10218	19299	50632	12521	12540	15115	415.522	501.501	516.234	364.425	418.904	776.405	2174.56	526.143	518.468	639.695	0.011092	0.921016	up
ENSMUSG00000020709	Adap2	163	128	89	84	61	58	45	47	97	87	2.30046	1.69445	1.32552	1.28281	0.86635	0.819187	0.672174	0.689526	1.39885	1.28488	0.0134728	-0.729259	down
ENSMUSG00000073830	Mup14	403	74	91	33	847	42	116	18	129	65	13.7584	1.89847	2.59949	0.973221	23.5681	1.42045	4.21066	0.498233	3.62038	2.31144	0.0134897	-2.24032	down
ENSMUSG00000026708	Cenpl	49	33	27	45	17	36	98	45	60	70	0.595066	0.285134	0.183526	0.551457	0.216953	0.238953	0.814309	0.435879	0.699694	0.824235	0.0270636	0.792927	up
ENSMUSG00000040950	Mgl2	251	173	185	204	162	545	340	130	391	308	4.06061	2.62788	3.3224	3.51444	2.63664	8.68136	5.97012	2.18126	6.41475	5.2556	0.0133888	0.710655	up
ENSMUSG00000034463	Scara3	572	490	416	438	121	988	806	477	426	957	4.01984	3.23465	3.07665	3.31629	0.86376	6.93745	6.04044	3.49947	3.06835	7.06818	0.0165795	0.804414	up
ENSMUSG00000061132	Blnk	50	41	24	40	32	117	99	83	62	70	0.592881	0.453689	0.301445	0.533804	0.380963	1.42446	1.26823	1.03486	0.764936	0.874782	0.000173557	1.14154	up
ENSMUSG00000034664	Itga2b	31	30	17	34	13	48	89	33	44	52	0.22154	0.205774	0.12835	0.269798	0.095191	0.348284	0.691122	0.24795	0.325695	0.397035	0.00636685	1.02291	up
ENSMUSG00000028854	Slc9a1	883	1035	525	723	690	443	462	413	667	670	4.7758	5.25514	2.99206	4.21652	3.79763	2.39091	2.66428	2.32749	3.70072	3.80219	0.00146231	-0.638746	down
ENSMUSG00000028581	Laptm5	459	258	206	261	295	816	1262	155	386	533	4.45795	2.34789	2.10335	2.7339	2.91892	7.92687	13.0884	1.57148	3.84969	5.44184	0.0186294	0.992332	up
ENSMUSG00000025758	Plk4	48	35	56	42	38	43	159	67	109	40	0.345268	0.236671	0.426517	0.322423	0.274923	0.307527	1.22942	0.507713	0.812419	0.298089	0.0404655	0.840151	up
ENSMUSG00000044350	Lacc1	53	50	33	35	27	87	145	43	113	45	0.547596	0.48541	0.352639	0.38288	0.274478	0.89256	1.58939	0.449904	1.18711	0.490412	0.00560209	1.04177	up
ENSMUSG00000048865	Arhgap30	56	34	43	33	38	109	332	40	47	65	0.313342	0.175237	0.252423	0.196078	0.213823	0.610503	1.98692	0.232459	0.271318	0.384107	0.00729901	1.45148	up
ENSMUSG00000024935	Slc1a1	392	387	294	396	142	148	87	134	164	176	2.60394	2.41644	2.05714	2.84248	0.961535	0.980678	0.615591	0.92576	1.11496	1.22888	2.14065e-06	-1.23863	down
NewGene_2723	NewGene_2723	52	32	67	36	38	80	69	76	84	64	1.59855	0.904364	2.16441	1.19559	1.18791	2.46477	2.26628	2.45374	2.66961	2.06092	0.0204188	0.648681	up
ENSMUSG00000040003	Magi2	60	15	46	66	23	45	112	77	95	70	0.230765	0.073621	0.185908	0.272424	0.089167	0.169483	0.455441	0.308532	0.376947	0.2824	0.0329687	0.873201	up
ENSMUSG00000025511	Tspan4	957	774	757	729	504	1563	1555	1121	1968	1713	16.8835	13.7407	15.4461	15.3858	8.95712	29.9333	30.9231	22.3483	38.0279	35.1074	4.33412e-15	1.00642	up
ENSMUSG00000020034	Tcp11l2	4999	5937	4794	5311	4886	3385	3513	2726	3056	4496	46.4125	51.7404	46.8812	53.1826	46.1634	31.3823	34.7623	26.3911	29.1201	43.8333	4.47012e-06	-0.694094	down
NewGene_538	NewGene_538	192	142	184	143	111	91	69	86	107	145	5.37962	3.72532	5.40607	4.31738	3.14158	2.52767	2.05769	2.51246	3.06972	4.24872	0.00152223	-0.713764	down
ENSMUSG00000073684	Faap20	175	123	131	136	145	337	397	146	452	166	3.28101	2.32843	2.54415	2.50311	2.80833	6.14012	8.81769	3.10465	8.298	3.77379	0.00151728	0.958575	up
ENSMUSG00000034586	Hid1	69	82	56	81	54	131	63	110	194	172	0.525561	0.589762	0.449042	0.669253	0.424106	1.0043	0.518225	0.880454	1.55655	1.40055	0.00314401	0.87136	up
ENSMUSG00000024011	Pi16	1248	500	654	900	382	1869	970	788	1143	1346	8.25425	3.14858	4.55615	6.29993	2.67309	12.4394	6.66081	5.47931	7.79924	9.61824	0.0157285	0.680664	up
ENSMUSG00000090622	A930033H14Rik	61	31	40	24	18	56	51	39	107	63	0.512069	0.24109	0.358261	0.218779	0.152749	0.470749	0.457655	0.340364	0.92789	0.561829	0.0299586	0.781741	up
ENSMUSG00000110439	Mup22	5735	833	117	105	710	110	247	33	345	224	168.535	22.9538	3.60169	3.30268	21.2281	3.21837	7.72343	0.985371	10.3997	6.90211	0.00275487	-2.99883	down
ENSMUSG00000038112	AW551984	35	27	4	32	17	68	163	40	42	52	0.204713	0.14907	0.021355	0.197629	0.091299	0.398816	1.02111	0.2399	0.249946	0.315764	0.00350686	1.60579	up
ENSMUSG00000063838	Cdc42ep5	108	79	57	60	34	175	76	82	161	120	2.65323	1.80628	1.47745	1.59298	0.830137	4.30268	1.99924	2.08919	4.05042	3.08522	0.0113486	0.795711	up
ENSMUSG00000025498	Irf7	259	81	127	204	182	309	408	134	461	220	3.24797	1.00709	1.6761	2.78737	2.38421	4.09928	5.31388	1.82803	6.04374	3.00432	0.0381869	0.72861	up
ENSMUSG00000026126	Ptpn18	75	48	48	63	55	153	247	81	66	88	1.20788	0.718513	0.816755	1.36768	1.17441	3.25523	4.27088	1.56958	1.27601	1.49131	0.00578271	1.05716	up
ENSMUSG00000074519	Zfp971	91	48	51	52	56	118	143	67	104	67	2.23499	1.0604	1.30824	1.38049	1.47036	3.15522	4.15321	1.8093	2.64278	1.77285	0.0263096	0.659545	up
ENSMUSG00000034795	Ccdc122	87	60	42	107	92	148	204	140	192	70	1.4139	0.887572	0.71138	1.80709	1.71812	2.31065	3.55738	2.47818	3.09499	1.07841	0.0157716	0.859807	up
ENSMUSG00000035226	Rims4	77	85	56	101	36	51	31	21	85	39	0.392436	0.40558	0.298291	0.550794	0.181894	0.256044	0.166288	0.1086	0.441565	0.204322	0.0480117	-0.741971	down
ENSMUSG00000078515	Ddi2	5320	6400	5684	5896	4100	3314	2646	3743	3088	5264	14.4235	18.584	15.8548	17.1944	11.4158	8.76353	7.46859	10.5105	8.39301	14.6409	0.000660693	-0.676826	down
ENSMUSG00000015247	Nipsnap3b	317	130	144	153	105	201	551	137	522	172	5.20678	1.98021	2.46635	2.68361	1.73513	3.27093	9.56111	2.32132	8.73284	2.93706	0.0394614	0.819765	up
ENSMUSG00000020573	Pik3cg	33	27	32	30	37	103	99	31	59	83	0.171666	0.117749	0.142805	0.137585	0.158147	0.477149	0.551872	0.150638	0.314576	0.374251	0.00173218	1.1178	up
ENSMUSG00000024222	Fkbp5	4658	5814	2432	3655	5148	3239	1485	1603	2824	2544	33.2417	38.9485	18.2768	28.1325	37.3907	23.0911	10.3758	11.9313	20.6747	19.0578	0.000301395	-1.01631	down
ENSMUSG00000047420	Fam180a	38	36	36	40	16	76	65	67	22	82	0.594484	0.517667	0.586536	0.668766	0.24177	1.18794	1.07849	1.10082	0.343659	1.34475	0.0300447	0.871874	up
ENSMUSG00000047180	Neurl3	72	64	95	81	69	140	254	72	112	144	0.714687	0.623738	1.02028	0.906499	0.69385	1.35881	2.62979	0.722341	1.11898	1.49199	0.0104355	0.817062	up
ENSMUSG00000020423	Btg2	1317	2673	1671	1205	1388	752	993	751	1102	902	12.1468	23.138	16.2289	11.9881	13.0208	6.92607	9.76178	7.22325	10.4252	8.73164	2.38354e-05	-0.978509	down
ENSMUSG00000022488	Nckap1l	123	45	29	56	67	152	291	59	111	121	0.693812	0.247482	0.163451	0.333275	0.363835	0.807782	1.6596	0.325423	0.615165	0.742994	0.0124805	1.11163	up
NewGene_8374	NewGene_8374	147	118	75	87	139	224	258	171	157	119	2.44671	1.91308	1.4254	1.5318	2.96726	4.71516	5.66893	2.92515	3.0605	2.42993	0.0420438	0.622908	up
ENSMUSG00000018537	Pcgf2	138	58	51	66	66	134	183	88	148	135	1.4844	0.553857	0.54151	0.719591	0.72165	1.43502	1.97661	0.940628	1.54633	1.58193	0.00676979	0.78261	up
ENSMUSG00000030513	Pcsk6	1013	887	816	940	424	1763	1309	613	1868	1053	6.03503	4.91872	4.9484	5.98093	2.50333	10.1961	8.01455	3.67408	11.4173	6.6297	0.0186363	0.610624	up
NewGene_7300	NewGene_7300	114	127	78	135	74	70	27	79	56	58	1.66833	1.7404	1.19954	2.12649	1.10231	1.01919	0.41989	1.20304	0.8381	0.8871	0.00536021	-0.914848	down
ENSMUSG00000021928	Ebpl	208	143	190	219	145	405	311	265	294	211	0.519577	0.335919	0.499333	0.589888	0.368006	1.01265	0.829855	0.69108	0.755262	0.554787	0.00290257	0.641908	up
ENSMUSG00000033220	Rac2	63	41	88	51	74	235	1352	70	144	78	0.519595	0.318373	0.771185	0.450438	0.640601	1.95942	12.1246	0.605619	1.23482	0.682652	0.00267077	2.44619	up
ENSMUSG00000048163	Selplg	100	45	30	50	33	120	393	15	95	79	1.38646	0.571342	0.418637	0.735442	0.44806	1.79455	5.71107	0.210262	1.35017	1.12633	0.0247748	1.37706	up
ENSMUSG00000039361	Picalm	9935	10618	9018	7935	9897	6241	6319	5811	9190	6212	62.151	69.0269	59.5244	55.6027	69.4881	42.4756	42.4963	40.3747	59.9359	45.1677	0.000179866	-0.599478	down
ENSMUSG00000028044	Cks1b	172	124	122	148	142	310	417	175	244	135	5.11252	3.45391	3.8247	4.73	4.28338	9.22115	13.2443	5.41548	7.44449	4.21599	0.0108339	0.763519	up
ENSMUSG00000029675	Eln	1027	1098	1173	809	275	575	405	479	581	709	6.74257	6.7657	8.11002	5.72739	1.83137	3.77022	2.83068	3.27392	3.90943	4.88867	0.01296	-0.724107	down
ENSMUSG00000069917	Hba-a2	5200	6414	5625	3666	4216	8036	20944	5879	5561	7146	237.489	274.917	270.552	180.601	195.916	366.438	1019.61	280.029	260.639	342.746	0.0154808	0.834196	up
ENSMUSG00000069919	Hba-a1	7240	9635	7906	5231	6159	12059	40687	8305	8051	10357	262.044	327.352	301.398	204.204	226.863	435.864	1569.88	313.535	299.093	393.724	0.0104735	1.04514	up
ENSMUSG00000074918	Inafm2	465	281	264	348	194	593	749	198	966	372	3.84604	2.17835	2.30399	3.10527	1.62816	4.90667	6.61292	1.71101	8.21611	3.23122	0.0163451	0.795291	up
NewGene_1407	NewGene_1407	73	58	53	71	39	109	118	82	108	102	1.40037	1.05053	1.08242	1.49372	0.754382	2.11447	2.42459	1.72233	2.13949	2.07867	0.000228659	0.74491	up
ENSMUSG00000055298	Ctsj	78	80	218	76	60	45	57	6	43	84	1.37593	1.32093	4.0834	1.44969	1.08199	0.798544	1.07844	0.102512	0.775886	1.55966	0.0182161	-1.25117	down
ENSMUSG00000056214	Pard6g	213	82	58	135	58	149	278	62	466	172	1.70976	0.616855	0.490369	1.16338	0.473236	1.19086	2.37927	0.517335	3.84518	1.4461	0.0361349	0.956172	up
ENSMUSG00000019850	Tnfaip3	170	95	186	135	52	205	270	246	240	315	0.969522	0.51014	1.11842	0.844979	0.30022	1.1705	1.64133	1.46242	1.41199	1.90023	0.000695219	0.952301	up
ENSMUSG00000050164	Mchr1	34	34	46	44	10	89	131	120	42	84	0.385835	0.365258	0.559696	0.541189	0.10798	1.02114	1.60517	1.44216	0.49675	1.01703	0.000691903	1.45441	up
ENSMUSG00000037860	Aim2	53	21	13	23	26	77	95	36	40	69	0.57602	0.172213	0.119215	0.219824	0.23121	0.681206	1.22317	0.332494	0.522005	0.641781	0.00691737	1.1489	up
ENSMUSG00000030124	Lag3	38	9	6	39	9	46	74	11	127	22	0.474202	0.095085	0.07012	0.524233	0.111085	0.579239	0.996056	0.13344	1.64398	0.2884	0.0406314	1.38476	up
ENSMUSG00000038712	Mindy1	2069	2404	1635	1990	1600	1298	1198	1287	1378	1679	20.0208	21.8035	15.6246	19.5543	15.4486	12.0488	14.6392	12.4592	14.4028	17.518	3.89337e-05	-0.586552	down
ENSMUSG00000025997	Ikzf2	360	357	443	371	220	171	208	172	222	243	0.977087	0.912691	1.28258	1.08863	0.612834	0.463889	0.602879	0.487324	0.618582	0.691769	5.52881e-07	-0.864516	down
NewGene_9196	NewGene_9196	36	32	30	23	57	150	453	19	33	40	0.648019	0.538333	0.556563	0.43735	1.03078	2.69841	8.7074	0.351734	0.596175	0.740074	0.0115541	1.81923	up
ENSMUSG00000024118	Tedc2	100	52	98	79	51	100	160	75	178	119	1.16279	0.570005	1.20051	0.992565	0.599522	1.15609	1.99079	0.909782	2.12527	1.45918	0.0198188	0.642446	up
ENSMUSG00000074896	Ifit3	197	164	117	185	66	310	400	210	379	310	2.85527	2.22735	1.77771	2.88829	0.969642	4.48634	6.16727	3.1678	5.62879	4.71102	9.34171e-06	1.07826	up
ENSMUSG00000022978	Mis18a	101	78	83	113	55	115	229	86	186	88	1.90302	1.38058	1.65109	2.29721	1.06238	2.17244	4.61609	1.69529	3.62247	1.74588	0.0413599	0.628104	up
ENSMUSG00000002910	Arrdc2	9075	11711	4063	9315	7347	3742	1729	3761	4848	3046	97.4973	118.099	45.9749	107.947	80.322	40.1391	19.7978	42.1406	53.45	34.3638	5.58092e-06	-1.35947	down
ENSMUSG00000013584	Aldh1a2	60	33	50	25	14	199	62	147	48	19	0.66996	0.337703	0.577174	0.300085	0.156111	2.21321	0.735734	1.70832	0.544527	0.216433	0.0179655	1.40121	up
ENSMUSG00000054252	Fgfr3	202	201	354	218	77	119	207	87	82	132	1.20246	1.12686	2.25639	1.39923	0.463446	0.705553	1.31089	0.535539	0.562636	0.828454	0.0257982	-0.805242	down
ENSMUSG00000049672	Zbtb14	488	340	442	460	251	717	636	378	753	726	2.92616	1.85024	2.69717	2.98437	1.48173	4.15335	3.93299	2.28309	4.64604	4.67894	0.00081494	0.610618	up
ENSMUSG00000022237	Ankrd33b	1717	1759	1820	1783	989	872	794	752	933	1283	7.18588	6.98154	7.57081	7.86369	4.99991	4.17486	5.16669	3.65799	4.12339	5.59283	1.7481e-07	-0.877259	down
ENSMUSG00000032528	Vipr1	105	143	152	141	38	65	43	70	32	125	0.540285	0.689312	0.824751	0.784766	0.196342	0.333086	0.236327	0.376372	0.169309	0.672996	0.0498429	-0.83355	down
ENSMUSG00000058207	Serpina3k	423	56	387	17	1298	31	49	18	230	7	5.20274	0.635539	5.01373	0.214145	16.2364	0.3688	0.63871	0.220746	2.90126	0.088878	0.00805498	-3.0292	down
ENSMUSG00000024300	Myo1f	67	34	28	47	34	139	403	36	64	59	0.438107	0.210028	0.18949	0.330318	0.224257	0.916246	2.83265	0.246651	0.432875	0.403045	0.00375057	1.66569	up
ENSMUSG00000027656	Ccn5	190	117	104	141	51	401	289	162	152	276	2.78483	1.61311	1.60725	2.23058	0.751425	5.88868	4.52574	2.47642	2.28152	4.2645	0.00158921	1.04495	up
ENSMUSG00000035834	Polr3g	100	63	83	95	33	113	115	106	181	103	0.834214	0.481183	0.718337	0.839122	0.348626	0.930075	1.01159	0.915882	1.52617	0.889681	0.014522	0.661896	up
NewGene_4850	NewGene_4850	2590	490	2084	1263	2994	2078	1069	529	398	1014	34.886	6.18956	29.5616	18.3495	41.0463	27.9499	15.3465	7.42269	5.50308	14.339	0.0370286	-1.01974	down
ENSMUSG00000025075	Habp2	139	253	157	180	100	103	66	142	93	123	1.24651	2.13374	1.48542	1.74061	0.90849	0.91434	0.614614	1.32494	0.850613	1.15892	0.0205597	-0.705969	down
ENSMUSG00000053063	Clec12a	49	24	6	36	37	116	760	11	72	44	0.493574	0.221315	0.07289	0.390221	0.374662	1.17068	8.18265	0.096924	0.739717	0.451678	0.00802885	2.61825	up
ENSMUSG00000028989	Angptl7	346	628	362	398	548	1809	2156	1178	763	2807	4.05353	6.91154	4.46434	5.03347	6.54149	21.1872	26.9574	14.4059	9.18539	34.5704	1.02552e-07	1.81075	up
ENSMUSG00000078607	1810010H24Rik	67	28	21	59	28	106	70	45	87	70	1.00234	0.390766	0.324818	1.09816	0.653223	1.58741	1.11506	0.700361	1.34493	1.08647	0.0215078	0.826587	up
ENSMUSG00000056749	Nfil3	531	786	870	758	802	559	561	532	418	532	6.61999	9.21054	11.4359	10.2089	10.1861	6.9592	7.46762	6.91961	5.35049	6.96684	0.00436846	-0.626257	down
ENSMUSG00000050592	Fam78a	195	146	343	255	70	427	573	388	257	500	1.24263	0.889546	2.27137	1.75008	0.456593	2.65987	3.99509	2.52682	1.68121	3.28436	0.00303692	1.04291	up
ENSMUSG00000076435	Acsf2	262	201	116	154	138	192	327	161	1013	210	2.0996	1.51058	0.977915	1.33072	1.12226	1.53216	2.7952	1.34008	8.33306	1.76246	0.0220106	0.996649	up
ENSMUSG00000048756	Foxo3	1354	1650	1099	1451	948	797	853	671	963	1159	5.09375	5.80114	4.27686	5.77682	3.61833	2.94015	3.35769	2.5826	3.69362	4.49528	5.19993e-05	-0.637965	down
ENSMUSG00000020738	Sumo2	3165	1734	2498	1984	1919	3844	6082	2764	4255	1511	76.2076	39.1479	63.4246	51.5735	47.108	106.757	156.384	69.4914	105.427	38.2346	0.0392725	0.628713	up
ENSMUSG00000026480	Ncf2	53	57	62	57	86	206	424	72	67	82	0.377159	0.380564	0.589297	0.59487	0.61665	1.97422	4.39633	0.53044	0.487475	0.609955	0.0105895	1.30767	up
ENSMUSG00000034459	Ifit1	123	82	66	66	43	137	208	93	104	121	1.16376	0.729817	0.652529	0.677989	0.413625	1.30275	2.10498	0.918663	1.01051	1.20665	0.0114794	0.749266	up
ENSMUSG00000034457	Eda2r	2305	2974	1686	2290	1750	1575	987	1456	1198	2025	12.2806	14.8661	9.45369	13.1644	9.50203	8.37253	5.60097	8.08099	6.54159	11.3217	0.00238088	-0.678644	down
ENSMUSG00000050410	Tcf19	34	35	26	55	18	45	163	25	85	56	0.578239	0.559563	0.416831	1.20282	0.263527	0.632558	2.52124	0.442675	1.26408	1.1254	0.0257011	1.06537	up
ENSMUSG00000040797	Iqsec3	93	84	90	144	27	37	49	50	72	70	0.308568	0.261339	0.315819	0.515566	0.091738	0.123662	0.174046	0.176637	0.249363	0.246647	0.0494409	-0.711591	down
ENSMUSG00000066456	Hmgn3	201	102	117	140	52	215	329	148	288	205	4.93759	2.1214	3.1145	3.78189	1.33909	4.7337	9.55511	4.1971	7.1798	5.21468	0.00183555	0.897686	up
ENSMUSG00000033538	Casp4	102	56	75	74	38	143	146	96	169	76	1.75498	0.912944	1.37786	1.39901	0.664847	2.48902	2.72731	1.75108	3.04365	1.46178	0.00465863	0.8042	up
ENSMUSG00000061100	Retnla	617	486	426	434	376	2870	1128	262	615	725	26.0044	19.2611	18.8813	19.769	16.1366	121.084	50.7841	11.5093	26.6509	32.1312	0.0103037	1.17175	up
ENSMUSG00000028862	Map3k6	942	751	608	685	599	442	285	214	700	395	5.49453	4.11309	3.73827	4.31048	3.55369	2.57443	1.77271	1.29757	4.18968	2.41707	0.000161156	-0.928866	down
ENSMUSG00000024965	Fermt3	68	38	41	43	64	100	256	49	67	59	0.663174	0.327143	0.419339	0.444435	0.616515	0.965201	2.64754	0.498759	0.668795	0.534772	0.0418999	0.954742	up
ENSMUSG00000045534	Kcna5	988	952	783	1007	461	449	428	526	808	707	8.72992	7.89203	7.28709	9.60074	4.14001	3.96017	4.03148	4.85004	7.32757	6.55802	0.00476764	-0.593666	down
ENSMUSG00000036390	Gadd45a	2245	3188	1480	2145	3253	1677	1664	1728	952	2127	46.4344	61.8892	32.2411	47.8469	68.4848	34.6244	36.687	37.2733	20.2108	46.2044	0.0191443	-0.701332	down
ENSMUSG00000062563	Cys1	139	140	215	157	108	507	437	273	189	402	2.01641	1.98615	3.28898	2.42894	1.67754	7.82929	7.65463	4.2702	2.89152	6.28693	5.48161e-05	1.17579	up
ENSMUSG00000030498	Gas2	150	130	86	174	112	204	330	159	319	176	1.34567	0.970145	0.756582	1.77612	0.981969	1.62509	3.08005	1.48106	2.71701	1.62097	0.00294949	0.769962	up
ENSMUSG00000022371	Col14a1	239	166	110	150	63	316	368	233	193	208	1.63458	0.999919	0.68089	1.09053	0.341556	1.8946	2.10162	1.34457	1.09844	1.39403	0.0065309	0.828265	up
ENSMUSG00000060572	Mfap2	84	52	61	41	43	117	98	96	84	108	1.96712	1.1406	1.51189	1.03895	1.00817	2.74045	2.46279	2.34775	2.01866	2.65803	0.00171008	0.775113	up
ENSMUSG00000027203	Dut	142	135	183	190	103	258	346	226	226	175	2.52316	2.51939	3.62579	4.24779	2.03533	5.20866	7.2117	4.05926	4.94877	2.79196	0.00793331	0.63938	up
ENSMUSG00000027208	Fgf7	188	136	164	129	96	417	568	226	162	355	1.81407	1.21185	1.66534	1.38102	0.96923	4.03439	5.87591	2.37496	1.60563	3.61214	0.000145552	1.213	up
ENSMUSG00000031889	D230025D16Rik	2617	3697	2312	2865	2764	1824	1686	1263	1855	2748	23.1243	30.196	21.1125	27.0664	24.4055	15.8879	15.5924	11.417	16.5202	25.2817	0.000378515	-0.718288	down
ENSMUSG00000006445	Epha2	247	258	218	243	103	165	73	96	157	212	1.59334	1.56445	1.47834	1.69189	0.675519	1.0635	0.502927	0.644281	1.03967	1.43674	0.021002	-0.679863	down
ENSMUSG00000003198	Zfp959	193	170	143	163	153	30	13	11	47	171	2.49358	2.09336	2.01549	2.26817	2.06132	0.837835	0.373269	0.320605	1.35926	2.32171	0.00281499	-1.7415	down
ENSMUSG00000022246	Rai14	422	440	479	457	235	317	272	235	217	307	2.24625	2.20303	2.60011	2.62791	1.22926	1.62692	1.49114	1.2581	1.14574	1.65982	0.00064695	-0.657688	down
NewGene_10388	NewGene_10388	44	81	15	67	75	25	41	22	44	33	0.3913	0.681742	0.141703	0.700779	0.676334	0.219482	0.390456	0.204056	0.399313	0.309531	0.0463273	-0.911658	down
ENSMUSG00000044811	Cd300c2	49	16	34	6	19	93	175	14	21	43	0.978885	0.287467	0.706748	0.114824	0.370595	1.97607	3.82845	0.284056	0.417452	0.927925	0.0399982	1.41166	up
ENSMUSG00000047731	Wbp1l	4881	5201	5792	6978	3910	3285	2338	2804	3125	3934	31.7237	31.7644	39.8281	48.8713	25.9706	21.2193	16.1655	19.1266	20.8852	27.0127	3.99343e-07	-0.871675	down
ENSMUSG00000050965	Prkca	2886	3430	2974	2715	2210	1745	1382	2248	1385	2500	8.68314	9.68532	9.42241	8.81023	6.76442	5.24239	4.43223	7.05183	4.27539	7.89874	0.00193428	-0.681735	down
ENSMUSG00000030048	Gkn3	33	59	66	35	22	63	46	104	63	122	0.965981	1.61332	2.0309	1.09743	0.637888	1.83722	1.42782	3.20332	1.90142	3.78519	0.0386958	0.831037	up
ENSMUSG00000049872	Calhm5	101	108	103	100	51	138	193	112	98	215	0.477748	0.481554	0.511365	0.510705	0.243115	0.651455	0.976439	0.553436	0.477901	1.07147	0.0204037	0.638712	up
ENSMUSG00000032038	St3gal4	309	160	151	188	211	329	431	134	986	227	3.83615	1.90977	1.92766	2.59145	2.60831	3.95604	5.5266	1.67538	12.8424	2.9694	0.0282261	0.904448	up
ENSMUSG00000079243	Xirp1	2631	3300	1895	1837	1163	1429	1787	1154	1264	1655	11.466	13.4902	8.69602	8.65009	5.15375	6.29369	8.26819	5.22182	5.64934	7.58494	0.00498694	-0.631961	down
ENSMUSG00000035049	Rrp12	671	891	547	529	499	304	270	447	437	583	3.90727	4.87243	3.35374	3.32417	2.95839	1.76827	1.67586	2.71303	2.6128	3.56728	0.00440364	-0.699154	down
NewGene_4616	NewGene_4616	6436	12071	12851	8639	13831	8088	6495	8395	4739	7251	43.6989	69.5788	86.0616	56.6221	84.2031	45.7992	40.0688	54.0641	32.8506	46.7456	0.0133224	-0.730227	down
ENSMUSG00000021974	Fgf9	48	39	40	35	21	96	86	42	25	113	0.37092	0.297889	0.385664	0.351806	0.192968	0.736637	0.644	0.394232	0.220037	1.25266	0.0275591	0.918389	up
ENSMUSG00000044468	Tent5c	50	66	48	69	36	51	425	68	47	97	0.222038	0.274545	0.225924	0.331797	0.161306	0.227683	2.02767	0.313928	0.214501	0.454221	0.0245463	1.28147	up
ENSMUSG00000020644	Id2	189	147	191	136	64	389	605	206	290	260	3.74906	2.73259	3.99264	2.92895	1.28298	7.74057	12.8641	4.30181	5.94789	5.43127	0.000160503	1.20872	up
ENSMUSG00000020649	Rrm2	54	49	42	33	13	35	575	27	62	56	0.619626	0.530282	0.501479	0.403554	0.14238	0.401382	7.05912	0.313673	0.722885	0.673552	0.00872508	1.93003	up
ENSMUSG00000024349	Sting1	182	162	180	133	90	233	183	216	225	342	1.99435	1.86272	2.08027	1.65053	1.00081	2.54353	2.21647	2.63576	2.56222	3.99907	0.00523119	0.613002	up
ENSMUSG00000047342	Zfp286	43	44	56	27	19	86	60	48	76	65	0.352513	0.340298	0.483438	0.249101	0.158039	0.705861	0.524265	0.426275	0.73107	0.561419	0.0163555	0.748624	up
ENSMUSG00000026395	Ptprc	119	65	76	81	77	224	769	38	252	108	0.589889	0.301176	0.397031	0.432996	0.387491	1.11281	4.0858	0.195485	1.39159	0.564208	0.00360181	1.62804	up
ENSMUSG00000041202	Pla2g2d	110	33	30	79	41	168	100	75	64	155	1.27435	0.360637	0.360658	0.992569	0.518725	1.95691	1.24278	0.912041	0.865857	1.89088	0.0301872	0.889311	up
ENSMUSG00000055775	Myh8	2074	2682	2651	2647	1723	1368	1291	1788	1083	1842	8.537	10.3578	11.488	11.7877	7.22749	5.61867	5.65859	7.67106	4.57175	7.95654	0.000595802	-0.737911	down
ENSMUSG00000040152	Thbs1	408	535	318	316	210	547	980	373	488	654	1.76368	2.17052	1.44538	1.47108	0.921879	2.35987	4.51609	1.68234	2.16371	2.97094	0.010853	0.693417	up
ENSMUSG00000017969	Ptgis	121	115	105	85	113	280	356	101	139	257	1.51218	1.3229	1.40076	1.20289	1.47901	3.40717	4.63341	1.32103	1.83338	3.33603	0.00334115	0.961578	up
ENSMUSG00000102976	Zc3h11a	178	34	47	27	25	2820	2459	30	28	131	1.96741	0.75128	1.47646	0.933305	0.737096	16.3637	15.2204	0.746384	0.732974	1.718	0.000550394	4.13522	up
ENSMUSG00000020251	Glt8d2	71	36	54	48	24	158	111	85	59	107	0.869577	0.385945	0.661827	0.587351	0.305809	1.83127	1.38209	1.02174	0.70351	1.37161	0.00102427	1.11379	up
ENSMUSG00000042807	Hecw2	651	552	570	562	193	247	240	117	313	323	1.46219	1.16382	1.34774	1.36061	0.44052	0.553482	0.574564	0.273399	0.720313	0.759698	9.18128e-05	-1.10381	down
ENSMUSG00000035273	Hpse	53	33	13	38	15	96	105	17	60	65	0.426765	0.245236	0.110577	0.325837	0.120164	0.77116	0.906864	0.137775	0.495597	0.546974	0.0234977	1.10904	up
ENSMUSG00000045679	Pqlc3	182	130	133	118	78	255	412	115	262	218	2.32543	1.6132	1.76212	1.61214	1.02765	3.39723	5.73471	1.52349	3.45866	2.96697	0.0020015	0.897799	up
ENSMUSG00000035493	Tgfbi	1454	1462	1014	1563	872	2546	2397	1154	1611	2576	13.5338	12.7668	9.95068	15.6821	8.2667	23.6969	23.8199	11.2184	15.3934	25.1964	0.00592698	0.610117	up
ENSMUSG00000042379	Esm1	71	39	73	58	24	119	185	70	49	142	0.845824	0.431944	0.91806	0.75278	0.294686	1.42505	2.37209	0.873356	0.596312	1.78902	0.00953645	1.03847	up
ENSMUSG00000032725	Folr2	298	158	186	154	196	622	439	119	198	403	7.13319	3.50608	4.63253	4.01331	4.83388	14.7517	11.0771	2.95975	4.86017	10.0133	0.0493	0.745367	up
ENSMUSG00000117679	Apbb3	976	1570	778	768	1562	738	543	762	619	856	12.0692	18.3091	10.162	10.1528	19.694	9.07119	7.10693	9.81871	7.80734	11.0615	0.00638442	-0.803185	down
ENSMUSG00000015950	Ncf1	135	109	72	98	112	246	1089	74	98	169	1.239	0.942325	0.657942	0.931482	1.05311	2.27462	10.7847	0.715762	0.922383	1.64067	0.00817702	1.57128	up
ENSMUSG00000037722	Gnpnat1	65	75	70	59	67	151	145	68	174	68	0.654597	0.613468	0.651042	0.559204	0.677705	1.39603	1.40002	0.622923	1.62392	0.627865	0.0168664	0.733059	up
ENSMUSG00000020474	Polm	161	135	153	101	50	193	142	231	171	222	1.38528	1.09115	1.39094	0.941412	0.442229	1.66549	1.3013	2.07698	1.51015	2.01551	0.0256882	0.641946	up
ENSMUSG00000028600	Podn	586	224	331	405	357	644	917	430	1671	563	4.87953	1.67637	2.78062	3.70403	2.89181	5.13157	7.79877	3.6457	14.4099	4.71109	0.00161968	1.03309	up
ENSMUSG00000034936	Arl4d	522	1004	324	585	968	342	169	275	367	363	9.5491	17.2514	6.23766	11.536	18.0174	6.25017	3.28597	5.23562	6.89561	6.96935	0.000176558	-1.306	down
NewGene_4199	NewGene_4199	48	42	31	27	16	106	61	75	53	38	1.4651	1.19968	1.00631	0.902227	0.500422	3.27467	2.01291	2.39789	1.67855	1.2373	0.00998718	0.990536	up
ENSMUSG00000078771	Evi2a	162	184	154	144	97	403	557	219	182	289	2.73318	2.86124	2.68634	2.64969	1.67722	6.92443	10.2528	3.89774	3.19333	5.08954	0.000387285	1.08653	up
ENSMUSG00000024338	Psmb8	691	376	344	572	395	681	924	405	1225	667	10.7308	5.48094	5.62655	9.57886	6.23523	10.6266	15.2918	6.55619	19.9063	10.8754	0.0165726	0.613026	up
ENSMUSG00000044006	Cilp2	41	49	69	21	19	53	129	97	49	235	0.236366	0.26608	0.422252	0.128806	0.111492	0.309145	0.805157	0.59157	0.294758	1.44449	0.00373785	1.43137	up
ENSMUSG00000038552	Fndc4	39	40	42	42	22	64	75	52	69	64	0.498948	0.39972	0.494274	0.509324	0.247951	0.715613	0.915156	0.612171	0.831026	0.782559	0.00262585	0.730737	up
ENSMUSG00000031442	Mcf2l	1997	1818	1702	1937	866	932	592	849	1454	1489	12.4617	11.8418	12.9343	19.5005	5.44845	9.3331	3.02185	8.675	14.251	13.8704	0.00327288	-0.722381	down
ENSMUSG00000001020	S100a4	356	464	382	252	282	883	1937	562	283	670	18.148	22.2095	20.4197	13.8218	14.5867	44.7812	104.9	29.7721	14.7624	35.6792	0.00239608	1.24367	up
ENSMUSG00000028019	Pdgfc	158	56	39	100	48	212	282	38	299	100	1.13253	0.37457	0.294022	0.853993	0.345746	1.51561	2.15739	0.282856	2.20435	0.752987	0.0211833	1.13466	up
ENSMUSG00000026640	Plxna2	1172	940	1216	1317	344	528	308	293	485	560	2.68574	2.02103	2.93451	3.25504	0.801738	1.20814	0.750811	0.699846	1.14024	1.34691	1.05326e-05	-1.2599	down
ENSMUSG00000028977	Casz1	962	999	797	787	458	435	406	558	495	882	3.68172	3.43501	2.98932	2.98601	1.75974	1.38607	1.41194	1.89033	2.18255	3.6079	0.014272	-0.588573	down
NewGene_6415	NewGene_6415	39	35	89	62	37	96	75	132	47	129	0.703708	0.739531	1.91898	1.34922	0.854475	1.82509	1.82316	3.2115	1.09755	2.66186	0.0439187	0.815655	up
ENSMUSG00000032845	Alpk2	1439	2033	2029	2076	1325	984	796	1256	840	1449	7.23655	11.8547	13.6269	7.87153	9.25719	9.3992	6.73844	4.7217	5.7349	7.91781	0.000440232	-0.810973	down
ENSMUSG00000028007	Snx7	245	157	138	184	174	299	253	224	485	198	3.43206	1.86363	1.9055	2.57376	2.35304	4.121	3.45772	3.23371	6.69213	2.79986	0.0168611	0.598491	up
ENSMUSG00000002257	Def6	51	63	49	40	26	47	230	55	85	69	0.564571	0.647978	0.562487	0.469772	0.291594	0.511808	2.71814	0.628541	0.96149	0.80065	0.023689	1.01012	up
ENSMUSG00000070354	Evi2	24	47	18	37	39	81	391	19	29	18	0.148676	0.282933	0.120009	0.247691	0.248607	0.512638	2.67035	0.122792	0.188425	0.115691	0.0365287	1.58537	up
ENSMUSG00000048706	Lurap1l	140	50	131	105	50	167	150	110	181	163	1.15459	0.38017	1.13633	0.926474	0.416763	1.37312	1.31457	0.938291	1.5262	1.40925	0.0294346	0.628868	up
ENSMUSG00000089873	Mup13	621	136	123	53	464	75	191	26	202	91	15.9615	3.27465	3.32863	1.44436	12.1389	1.91243	5.23275	0.677328	5.32122	2.44259	0.0221628	-1.41642	down
ENSMUSG00000028195	Ccn1	3030	3409	2345	2173	1942	6241	2636	4908	2015	5450	37.9705	40.0943	30.9395	29.3641	24.7658	78.0849	35.2099	64.1372	25.9044	71.7248	0.0313427	0.669717	up
NewGene_8741	NewGene_8741	43	37	58	59	17	89	69	57	90	72	0.267997	0.21498	0.385489	0.401992	0.10511	0.565089	0.46547	0.375946	0.580231	0.474332	0.0150641	0.746987	up
ENSMUSG00000017737	Mmp9	150	55	111	92	145	161	2483	30	125	133	1.18548	0.410153	0.923687	0.784926	1.16417	1.27961	21.0813	0.246135	1.01774	1.1001	0.0256662	2.28471	up
ENSMUSG00000078862	Gm14326	87	72	71	47	293	54	29	37	67	66	1.2685	1.01233	1.05467	0.760603	8.96559	0.959706	0.424037	0.597051	0.997693	0.963505	0.00910185	-1.40245	down
ENSMUSG00000040747	Cd53	301	114	85	140	159	516	1065	78	190	260	4.36594	1.54755	1.29536	2.18473	2.34	7.4735	16.4856	1.17293	2.8214	3.95848	0.0155584	1.31643	up
ENSMUSG00000040740	Slc25a34	466	798	309	507	354	225	152	209	414	323	4.40873	7.0944	3.07752	5.18081	3.40711	2.12515	1.53089	2.0618	4.01801	3.21184	0.000908893	-0.98006	down
ENSMUSG00000025270	Alas2	214	320	276	155	207	293	1947	234	241	303	2.65788	3.78318	3.61625	2.06704	2.63113	3.6339	25.7771	3.02488	3.06051	3.95004	0.0203537	1.26638	up
ENSMUSG00000033998	Kcnk1	86	153	90	77	42	13	71	66	41	53	0.969753	1.68759	1.07951	0.932208	0.480018	0.137685	0.849059	0.773067	0.473048	0.620074	0.0431401	-0.91639	down
ENSMUSG00000051736	Fam229b	63	60	66	50	120	151	225	129	86	89	2.11884	1.8403	2.31293	1.81502	4.14496	5.06023	8.36335	4.62739	2.97861	3.19652	0.0465305	0.793984	up
ENSMUSG00000026556	Vangl2	44	48	32	31	14	59	69	43	56	82	0.169612	0.173582	0.12873	0.128685	0.053852	0.225893	0.280998	0.173046	0.219082	0.329828	0.0116322	0.805117	up
ENSMUSG00000002043	Trappc6a	225	68	101	101	95	187	271	118	371	114	7.52384	2.02643	3.41229	3.47689	3.06185	6.12543	9.55244	4.07904	12.5193	3.95775	0.0398124	0.759211	up
ENSMUSG00000095304	Plac9a	795	2204	1525	2437	1124	3159	3429	3139	2585	2523	14.7799	37.6148	29.4912	47.1488	20.5771	57.2732	66.2668	58.3144	47.4892	47.9254	0.00567104	0.801902	up
ENSMUSG00000020538	Srebf1	2228	1724	2107	2360	976	2396	2613	2625	5506	2499	13.6248	9.75613	13.24	15.5593	6.31459	15.0106	16.387	18.7532	34.3735	15.9781	0.00756189	0.657973	up
ENSMUSG00000039109	F13a1	650	570	419	450	673	1309	1461	364	634	1114	4.15515	3.42178	2.82012	3.09969	4.37692	8.36089	9.96187	2.42769	4.16318	7.4837	0.0371761	0.696277	up
ENSMUSG00000021728	Emb	74	50	37	55	63	191	439	65	74	121	0.629587	0.400069	0.333265	0.501479	0.549846	1.64583	4.0434	0.583102	0.649966	1.09192	0.0012734	1.57327	up
ENSMUSG00000068699	Flnc	12002	14239	7571	8428	6222	4579	5650	4884	5780	8298	33.5997	37.4133	22.323	25.4478	17.7231	12.7982	16.8586	14.2591	16.6071	24.6657	0.000191399	-0.803929	down
ENSMUSG00000032841	Prr5l	88	24	22	48	58	94	131	28	408	41	0.563012	0.131497	0.131429	0.298757	0.344348	0.632366	0.819789	0.168313	2.64012	0.247585	0.0258237	1.38587	up
ENSMUSG00000031712	Il15	219	219	267	267	186	494	478	281	354	273	3.79356	3.01805	5.83787	4.59521	3.13816	8.14472	7.5282	4.94728	6.31133	4.48792	0.00490551	0.612848	up
ENSMUSG00000043556	Fbxl7	194	150	136	141	46	74	22	78	96	77	1.05503	0.76422	0.777627	0.827996	0.250144	0.403155	0.127555	0.442521	0.536599	0.437948	0.0128876	-0.980657	down
ENSMUSG00000041577	Prelp	1679	944	1333	1814	826	2911	2785	1383	4000	2564	11.7449	6.19971	9.8226	13.6888	5.87851	20.3409	20.7727	10.0893	28.733	18.8469	6.3122e-05	0.957029	up
ENSMUSG00000051906	Cd209f	139	50	103	72	124	346	183	88	89	269	2.95983	1.00042	2.31203	1.64781	2.67364	7.3607	4.13736	1.94429	1.94333	5.9936	0.0397848	0.882913	up
ENSMUSG00000105504	Gbp5	138	162	173	165	78	170	232	247	336	251	1.12475	1.24849	1.5064	1.42694	0.531735	1.14073	1.66098	2.09651	2.81947	2.16178	0.00208198	0.714761	up
ENSMUSG00000040212	Emp3	324	264	296	319	187	647	899	361	349	362	11.2291	8.45484	10.689	11.7605	6.63077	22.0691	33.4375	12.82	12.4109	13.0724	0.00323045	0.847898	up
ENSMUSG00000030037	Mrpl53	755	971	1115	884	1302	2609	1777	1756	1696	870	27.4866	33.1693	42.7487	34.6914	48.2337	94.8242	68.922	66.6671	63.3686	33.2517	0.0262665	0.679867	up
ENSMUSG00000048065	Cyb5r2	66	101	73	75	29	28	40	47	27	49	0.594203	0.864744	0.693211	0.728677	0.262824	0.254809	0.381986	0.44578	0.248527	0.462892	0.0125982	-0.892011	down
ENSMUSG00000028834	Trim63	38081	83951	19912	30572	46647	15116	7514	12412	14728	22774	510.885	1057.13	281.351	442.396	636.828	202.483	107.441	173.692	202.789	320.862	2.82597e-06	-1.71029	down
ENSMUSG00000020151	Ptprr	151	164	150	123	54	79	75	62	99	76	1.05418	1.07237	1.09971	0.922157	0.383531	0.551514	0.55367	0.445342	0.706125	0.5552	0.00261262	-0.780915	down
ENSMUSG00000059326	Csf2ra	58	41	50	44	41	138	256	17	109	48	0.784386	0.516681	0.709504	0.648872	0.559617	1.88164	3.72181	0.23711	1.59379	0.684371	0.0283381	1.16945	up
ENSMUSG00000047945	Marcksl1	44	15	43	33	39	136	253	42	66	62	0.688707	0.213371	0.710325	0.556953	0.61464	2.14062	4.2493	0.677959	1.0602	1.01888	0.00176159	1.57782	up
NewGene_1274	NewGene_1274	871	378	709	794	559	760	1011	595	2188	995	10.0912	3.79762	7.40036	10.2279	7.66276	8.52967	15.5041	7.28966	26.0576	12.3046	0.0391911	0.625267	up
ENSMUSG00000018143	Mafk	1460	2130	1319	1349	1209	937	946	805	916	1184	12.9618	17.7401	12.3295	12.9146	10.9254	8.30789	8.94752	7.45351	8.34309	11.0288	2.22755e-05	-0.730284	down
ENSMUSG00000041040	Fam117b	1299	1326	653	1130	631	586	602	496	855	574	5.93742	5.70577	3.14564	5.57049	2.93277	2.6759	2.93036	2.36389	4.01269	2.75325	0.000236155	-0.768035	down
ENSMUSG00000021943	Gdf10	224	285	105	221	107	231	304	315	278	392	1.08546	1.29615	0.532107	1.15734	0.527582	1.11909	1.5704	1.5914	1.38136	1.99754	0.0233891	0.636876	up
ENSMUSG00000030263	Lrmp	45	18	29	30	16	75	187	20	63	55	0.490092	0.174448	0.331696	0.345208	0.175207	0.857721	2.1654	0.220371	0.705183	0.636706	0.00436254	1.46247	up
ENSMUSG00000029641	Rasl11a	126	106	141	115	45	50	55	43	91	56	2.81487	2.22881	3.32892	2.77834	1.02505	1.11082	1.31116	0.996831	2.08224	1.3115	0.00151104	-0.9278	down
NewGene_9232	NewGene_9232	39	27	58	60	41	76	92	60	80	61	0.443163	0.295936	0.70074	0.843628	0.518124	1.05067	1.24644	0.809425	1.01075	0.761164	0.0366811	0.618152	up
ENSMUSG00000024076	Vit	52	117	96	68	46	118	185	64	115	171	0.480508	1.01913	0.939364	0.680222	0.430657	1.09251	1.83502	0.62251	1.09944	1.67147	0.0449731	0.682928	up
ENSMUSG00000024697	Gna14	84	84	111	61	37	64	45	41	50	58	0.639454	0.601641	0.892426	0.502707	0.284456	0.490759	0.363597	0.327742	0.3895	0.461997	0.03705	-0.616386	down
ENSMUSG00000040624	Plekhg1	379	414	304	425	126	118	121	141	211	175	1.29999	1.33388	1.09605	1.57358	0.440212	0.402099	0.43981	0.503676	0.740559	0.630648	2.51915e-05	-1.16317	down
ENSMUSG00000040621	Gemin8	55	48	41	75	34	66	84	89	99	69	0.734338	0.613687	0.576884	1.12323	0.446319	0.887664	1.21652	1.2487	1.38994	0.981666	0.0203092	0.619896	up
ENSMUSG00000026697	Myoc	2125	2726	2352	2559	1131	4558	3757	2966	1813	4792	25.9237	31.2142	30.2121	33.665	14.0291	55.5227	48.8564	37.7342	22.7005	61.3943	0.0168074	0.658536	up
ENSMUSG00000018740	Slc25a35	356	190	190	236	225	388	308	248	948	261	3.13208	1.23124	1.72703	2.13136	1.87458	3.02037	2.97132	1.96116	9.79246	2.22664	0.0322204	0.726101	up
ENSMUSG00000039911	Spsb1	907	1158	657	766	700	556	615	374	820	453	7.42952	8.97345	5.65851	6.80464	5.82121	4.54823	5.35943	3.18539	6.89731	4.0301	0.00125622	-0.675171	down
ENSMUSG00000019832	Rab32	230	51	63	110	110	300	588	81	281	92	2.7063	0.552854	0.780599	1.3909	1.3158	3.52408	7.40583	0.988038	3.39479	1.13719	0.0250331	1.16669	up
ENSMUSG00000060791	Gmfg	50	47	55	52	48	195	413	64	59	92	1.93938	1.72588	2.29175	2.12972	1.92862	7.76248	17.388	2.6837	2.3476	3.75413	0.00126467	1.61195	up
ENSMUSG00000071637	Cebpd	4038	8883	943	5875	8303	2771	2621	3488	2407	1761	27.2733	56.3112	6.70156	42.7965	57.0668	18.6844	18.8689	24.5658	16.6828	12.4882	0.00832799	-1.21014	down
ENSMUSG00000029561	Oasl2	143	69	114	120	79	206	287	98	170	182	1.15258	0.532572	0.966829	1.05067	0.647757	1.66098	2.47505	0.827089	1.43131	1.56479	0.00707408	0.76088	up
ENSMUSG00000008348	Ubc	33104	107819	22924	23129	33834	13455	8458	13889	16866	28527	321.082	980.292	234.025	241.592	334.381	130.046	87.1323	140.371	167.381	290.71	0.00793746	-1.54593	down
ENSMUSG00000028364	Tnc	94	38	77	37	27	126	397	145	147	167	0.332498	0.124817	0.287948	0.141364	0.096504	0.446705	1.50419	0.53789	0.534839	0.624223	9.9329e-06	1.80124	up
ENSMUSG00000032265	Tent5a	329	220	148	264	242	499	352	155	630	358	1.47253	0.922774	0.696313	1.27267	1.10016	2.23114	1.67748	0.719604	2.88917	1.68333	0.0482215	0.60591	up
NewGene_3469	NewGene_3469	45	50	59	67	54	75	90	90	129	112	0.412774	0.430528	0.568333	0.811877	0.530204	0.691072	0.962666	1.04502	1.96215	1.13433	0.00210513	0.746416	up
ENSMUSG00000041741	Pde3a	494	419	543	362	147	208	127	153	227	331	1.0151	0.80839	1.17582	0.802319	0.307114	0.426723	0.276444	0.327076	0.47708	0.714155	0.0016653	-0.974946	down
ENSMUSG00000004266	Ptpn6	41	40	26	50	45	109	411	40	70	82	0.453453	0.423181	0.285749	0.581141	0.509806	1.2184	4.97153	0.463004	0.815371	0.963554	0.00194282	1.70557	up
ENSMUSG00000004267	Eno2	47	19	18	31	7	55	67	29	44	63	0.416671	0.160479	0.169846	0.292441	0.062827	0.492704	0.638223	0.273556	0.407381	0.595221	0.0150247	1.04016	up
ENSMUSG00000089762	Ier5l	82	98	178	102	38	132	241	143	122	214	0.766772	0.86522	1.7587	1.03479	0.36295	1.24243	2.41988	1.4037	1.17721	2.11349	0.0466133	0.711939	up
ENSMUSG00000038349	Plcl1	274	290	293	176	134	139	105	185	174	206	1.05003	1.04385	1.18309	0.728206	0.521276	0.533225	0.430272	0.738878	0.682994	0.830612	0.0258331	-0.588008	down
ENSMUSG00000087119	Atg4a-ps	27	10	35	43	31	100	59	76	17	88	0.313238	0.110791	0.435551	0.55307	0.372608	1.18632	0.741318	0.939539	0.196452	1.10488	0.0262629	1.1469	up
ENSMUSG00000032064	Dixdc1	162	139	133	175	68	159	273	134	371	164	0.783052	0.606995	0.637644	0.961436	0.30441	0.701405	1.36325	0.646125	1.83489	0.761488	0.0352022	0.61684	up
ENSMUSG00000020389	Cdkl3	59	53	37	56	45	67	78	68	121	73	1.08248	0.612252	0.338085	0.81542	0.414736	0.617727	0.803939	0.652998	1.32585	0.765914	0.0141288	0.608058	up
ENSMUSG00000030579	Tyrobp	188	89	76	110	157	390	870	93	177	227	8.13391	3.60955	3.51369	5.15085	7.00038	17.2701	40.2126	4.30361	8.02021	10.6132	0.00539238	1.39057	up
ENSMUSG00000006519	Cyba	369	321	239	301	249	499	829	258	413	460	12.6093	10.2457	8.61485	11.0824	8.58845	16.975	30.0217	9.24705	14.5294	16.414	0.0137667	0.642726	up
ENSMUSG00000031628	Casp3	217	88	67	133	110	175	414	108	359	162	2.1096	0.798817	0.681627	1.39074	1.08688	1.69197	4.28619	1.09278	3.65756	1.64839	0.0206551	0.890649	up
NewGene_5257	NewGene_5257	5774	7860	4507	4062	6746	4569	1728	4814	1905	5190	53.3335	68.2328	43.6661	40.3404	63.3278	42.3033	16.8766	46.3722	18.1512	50.2072	0.0362377	-0.749901	down
ENSMUSG00000062593	Gm49339	13	39	43	54	13	58	516	20	64	45	0.170215	0.487116	0.679943	0.891261	0.166631	0.779667	7.9446	0.348858	0.954466	0.632675	0.00674124	2.0313	up
ENSMUSG00000039384	Dusp10	1637	2280	1644	1116	571	2280	1896	2596	2250	4425	14.9556	20.0852	15.6824	10.9082	5.2516	20.9212	18.4458	25.0615	21.6189	44.0637	0.00707107	0.838953	up
NewGene_4185	NewGene_4185	70	67	76	67	38	159	170	68	82	91	0.538234	0.483281	0.620351	0.56035	0.297257	1.23037	1.40879	0.552468	0.651523	0.744874	0.0142296	0.769822	up
ENSMUSG00000048924	Ccdc125	54	32	40	50	16	59	135	33	93	58	0.729924	0.321411	0.422649	0.567758	0.155518	0.624531	1.55105	0.359959	1.00512	0.693485	0.0242543	0.905772	up
ENSMUSG00000058715	Fcer1g	249	158	104	128	191	456	949	110	244	247	9.29607	5.51001	4.10447	5.17674	7.23038	17.0492	37.9	4.26501	9.35783	9.69464	0.0125759	1.16566	up
ENSMUSG00000024610	Cd74	2169	1037	1505	1896	1958	6107	3421	1018	3356	2208	43.6374	18.7929	30.8568	39.277	38.7063	118.621	70.9373	20.766	66.9874	45.0315	0.0311977	0.78817	up
ENSMUSG00000003949	Hlf	702	477	831	626	357	1251	1185	1111	1826	1155	3.14283	2.00407	3.96381	3.02279	1.62853	5.59891	5.66114	5.19013	8.40119	5.43732	1.74339e-07	1.04834	up
ENSMUSG00000042436	Mfap4	64	26	67	48	49	42	143	153	75	114	0.957989	0.350579	1.03177	0.745879	0.720212	1.11589	2.25739	2.33429	1.11816	1.76263	0.0166408	0.997265	up
ENSMUSG00000096054	Syne1	1277	1563	1045	1036	674	536	526	642	869	1078	1.70619	1.5717	1.18257	1.34805	0.886814	0.566189	0.50828	0.761135	1.00325	1.34117	0.00274316	-0.693228	down
ENSMUSG00000039994	Timeless	214	145	280	212	54	254	316	250	287	397	1.23071	0.785566	1.7106	1.32113	0.307899	1.44198	1.92172	1.51239	1.70519	2.41154	0.0323131	0.68194	up
ENSMUSG00000062382	Ftl1-ps1	333	207	222	284	466	729	1066	305	561	265	8.97627	5.23083	6.28449	8.25477	14.0425	21.6866	35.5316	8.57151	17.4786	7.48989	0.0392972	0.811848	up
ENSMUSG00000024672	Ms4a7	49	40	22	17	47	164	97	31	30	69	0.928854	0.718727	0.452327	0.365478	0.8925	3.42586	2.08308	0.504443	0.482569	1.36663	0.046863	1.04693	up
ENSMUSG00000049999	Ppp1r3d	126	47	92	128	61	118	151	95	265	148	0.97466	0.337104	0.750247	1.06685	0.478499	0.905062	1.24514	0.764247	2.10291	1.1994	0.0320319	0.682169	up
ENSMUSG00000033825	Tpsb2	57	80	39	94	71	359	151	19	90	193	1.22691	1.72708	0.896872	2.32419	1.6344	8.36277	3.73168	0.429083	2.06509	4.69828	0.0402702	1.12387	up
ENSMUSG00000017491	Rarb	31	29	59	53	18	70	59	90	74	58	0.246535	0.215596	0.503392	0.460147	0.143443	0.561467	0.50934	0.925538	0.612123	0.500594	0.0196244	0.834696	up
ENSMUSG00000030317	Timp4	6567	5318	6014	6845	3547	4294	2178	2195	4634	3134	30.2469	22.9908	29.1746	34.0027	16.6277	19.7456	10.6942	10.5561	22.0278	15.1627	4.62437e-05	-0.869742	down
ENSMUSG00000042045	Sln	80	169	91	50	117	109	1033	121	49	144	1.51776	3.02731	1.83973	1.03343	2.27162	2.07819	21.1305	2.41549	0.963735	2.88875	0.0361513	1.40918	up
ENSMUSG00000054072	Iigp1	426	247	335	302	151	693	531	296	589	437	3.71965	2.00153	2.85908	2.98167	1.23948	5.97657	4.88781	2.49473	5.25518	3.81365	0.00270369	0.733613	up
ENSMUSG00000000320	Alox12	56	42	67	36	34	92	215	82	103	61	0.480563	0.336307	0.610464	0.323092	0.310395	0.805884	1.96392	0.796177	0.90834	0.555612	0.00197699	1.15839	up
ENSMUSG00000022584	Ly6c2	219	230	79	211	92	175	1111	117	246	237	7.68496	7.58006	3.29396	8.04793	3.48996	5.83663	39.4701	4.33139	10.008	8.96667	0.0364693	1.11502	up
ENSMUSG00000020697	Lig3	636	343	818	455	436	340	277	487	330	417	2.9802	1.91084	3.65366	2.59684	1.88035	1.43925	1.24971	2.21114	1.73798	2.59376	0.0292298	-0.598389	down
ENSMUSG00000027962	Vcam1	375	210	297	342	176	332	1026	421	401	410	2.84293	1.53074	2.32392	2.83217	1.30399	2.69385	8.24769	3.30359	3.19328	3.26943	0.00931901	0.832159	up
ENSMUSG00000040187	Arntl2	38	31	18	38	17	52	118	58	49	44	0.325476	0.24418	0.158457	0.354683	0.250467	0.445716	1.10809	0.520867	0.756477	0.394185	0.00406976	1.12743	up
ENSMUSG00000053641	Dennd4a	227	114	114	191	110	204	353	148	378	158	0.662143	0.310775	0.350684	0.60128	0.325577	0.59459	1.10029	0.449277	1.13324	0.48486	0.0376796	0.630487	up
ENSMUSG00000002227	Mov10	66	27	38	75	39	101	145	22	184	70	0.448904	0.170037	0.268169	0.550346	0.268885	0.680798	1.05044	0.155867	1.31468	0.497295	0.0370709	0.97286	up
ENSMUSG00000001750	Tcirg1	352	297	195	260	147	301	655	175	496	402	3.31092	2.61949	1.94198	2.63208	1.24556	2.49381	5.80327	1.50405	4.77792	3.96757	0.0407778	0.613563	up
ENSMUSG00000048779	P2ry6	54	78	56	53	76	180	182	114	76	108	0.694665	0.947357	0.756397	0.736767	0.996583	2.33131	2.51439	1.53527	1.00146	1.46347	0.00398262	0.95804	up
ENSMUSG00000048772	Tmem53	143	58	40	64	84	199	244	92	362	65	3.65007	1.36041	1.04929	1.74512	2.14628	5.06045	6.61627	2.44793	9.4811	1.75191	0.00809424	1.19456	up
NewGene_9175	NewGene_9175	66	45	59	37	42	150	114	179	68	115	1.5533	1.00199	1.46252	0.934511	0.999625	3.55322	2.8772	4.41113	1.6532	2.85308	0.000144932	1.28921	up
ENSMUSG00000070031	Sp140	107	49	31	84	70	174	234	39	267	51	1.11336	0.475275	0.334159	0.93891	0.74464	1.8096	2.6057	0.421445	2.86787	0.550662	0.0388376	1.04494	up
ENSMUSG00000045038	Prkce	454	324	349	396	270	531	676	372	1256	351	1.83386	1.22808	1.48398	1.72685	1.11092	2.14346	2.91188	1.56773	5.21469	1.48775	0.0140766	0.722117	up
ENSMUSG00000018008	Cyth4	164	79	25	100	99	267	298	83	153	193	1.51166	0.67828	0.394723	0.957945	0.907781	2.4128	3.15971	0.778099	1.41904	1.83477	0.0210567	0.998882	up
ENSMUSG00000031951	Tmem231	54	45	57	53	26	69	58	60	113	93	0.455058	0.35597	0.500544	0.478589	0.21848	0.58229	0.516996	0.528202	0.977878	0.827762	0.0145953	0.65712	up
ENSMUSG00000026991	Pkp4	1639	1411	1150	1599	1097	688	743	709	1743	932	9.66095	7.78585	7.12795	10.0278	6.33208	3.8858	4.37309	4.13097	10.5913	5.70744	0.0064099	-0.623275	down
ENSMUSG00000028843	Sh3bgrl3	688	608	748	657	589	1391	2076	721	865	814	23.4649	19.4177	26.8073	24.1629	20.4502	47.3465	75.3712	25.6246	30.2582	29.1444	0.00783408	0.742795	up
ENSMUSG00000029468	P2rx7	97	125	57	98	43	113	168	103	137	169	0.495692	0.638279	0.359537	0.588823	0.221454	0.575865	0.917705	0.547125	0.729641	0.984085	0.0194314	0.647853	up
ENSMUSG00000025747	Tyms	28	31	37	38	21	65	161	54	69	39	0.213138	0.230632	0.299398	0.291852	0.166553	0.51085	1.36201	0.445915	0.614271	0.319307	0.00245163	1.24545	up
ENSMUSG00000038393	Txnip	79352	79685	53166	66226	52307	43975	37928	38463	44348	60847	717.118	675.179	505.29	645.089	481.194	396.845	363.435	361.218	411.329	576.658	4.34719e-05	-0.633728	down
ENSMUSG00000020108	Ddit4	1794	6498	538	1801	6941	752	759	1199	1465	717	25.8547	87.9257	8.16831	27.9937	101.828	10.8235	11.6641	18.0289	21.6696	10.8427	0.00308646	-2.01669	down
ENSMUSG00000078794	Dact3	79	80	60	66	32	127	117	79	67	121	0.665361	0.628963	0.52693	0.60069	0.268077	1.07207	1.05007	0.696658	0.575551	1.07473	0.0264522	0.631393	up
ENSMUSG00000079227	Ccr5	55	16	21	25	10	44	147	14	92	45	0.168928	0.045629	0.066405	0.08389	0.029065	0.132298	0.481385	0.044223	0.287472	0.143454	0.0172947	1.3677	up
ENSMUSG00000066258	Trim12a	149	132	95	157	76	158	288	136	216	190	2.56782	2.15973	1.71716	2.94534	1.29169	2.70051	5.22411	2.49584	3.83788	3.45776	0.00953697	0.623096	up
ENSMUSG00000038793	Lefty1	58	36	55	64	17	92	100	69	71	90	0.901096	0.527267	0.898411	1.07394	0.269561	1.42097	1.64998	1.12171	1.12813	1.46807	0.00822245	0.825273	up
ENSMUSG00000023832	Acat2	468	163	181	377	320	674	1003	200	2361	400	5.25856	1.87044	2.13869	4.56147	3.66595	7.56097	12.4878	2.37164	27.2909	4.73748	0.00299587	1.46797	up
ENSMUSG00000052837	Junb	762	856	1100	825	648	322	669	417	404	696	10.65	11.2301	16.1974	12.4328	9.21202	4.49331	9.96753	6.0776	5.78531	10.2136	0.000537831	-0.830011	down
ENSMUSG00000021998	Lcp1	421	227	212	258	221	720	2258	150	415	389	2.76835	1.39835	1.46558	1.83215	1.4813	4.73026	15.8517	1.02411	2.79922	2.68437	0.00494219	1.47134	up
ENSMUSG00000021994	Wnt5a	220	97	155	232	61	246	250	150	409	222	0.793264	0.328466	0.588295	0.902082	0.223919	0.88402	0.960885	0.561243	1.51469	0.841488	0.0388641	0.670388	up
ENSMUSG00000033295	Ptprf	208	241	143	118	194	94	62	84	132	137	0.684919	0.747409	0.49533	0.418485	0.650116	0.307671	0.215267	0.286621	0.447008	0.474583	0.000993816	-0.941949	down
ENSMUSG00000030929	Eri2	111	75	84	160	54	133	359	91	195	107	0.845525	0.504492	0.625866	1.24607	0.389443	0.939894	2.77111	0.717512	1.54696	0.797499	0.040997	0.796401	up
ENSMUSG00000003418	St8sia6	221	214	184	164	75	89	63	72	153	156	0.731436	0.666352	0.640856	0.58401	0.25106	0.29395	0.222689	0.247937	0.518142	0.541272	0.0131249	-0.764764	down
ENSMUSG00000030218	Mgp	2221	3237	1751	2006	1320	3813	4525	2789	2519	3422	91.0508	124.585	75.6037	88.7258	55.0624	156.116	197.764	119.282	105.986	147.356	0.00634601	0.63105	up
ENSMUSG00000071856	Mcc	754	614	575	653	312	347	291	233	627	509	2.44472	1.86207	1.95765	2.27031	1.02401	1.11395	0.997615	0.779638	2.08828	1.73449	0.0107871	-0.623893	down
ENSMUSG00000040675	Mthfd1l	48	47	72	27	18	89	84	105	96	109	0.324674	0.297466	0.520757	0.192509	0.124229	0.606976	0.616296	0.742719	0.677657	0.783926	0.000788377	1.13287	up
ENSMUSG00000002111	Spi1	104	37	61	68	97	213	419	49	80	142	1.45989	0.427731	0.794511	0.933161	1.22361	2.7219	5.55279	0.624057	1.01448	1.91419	0.0214097	1.18004	up
NewGene_3650	NewGene_3650	36	55	38	53	39	58	153	60	62	59	0.646475	0.828567	0.626612	1.01774	1.28819	0.953739	2.58598	1.11319	2.06106	0.979976	0.0439197	0.737433	up
ENSMUSG00000022150	Dab2	772	537	598	572	423	1398	1441	713	849	1123	4.45415	2.73469	3.54548	3.45648	2.67177	9.1643	8.45766	4.03701	4.74606	6.59378	3.33385e-05	0.854251	up
ENSMUSG00000025316	Banp	217	123	207	181	162	103	151	81	64	114	1.57663	0.689333	1.9628	1.89014	1.43754	0.952904	1.65246	0.734192	0.489792	1.01782	0.00126102	-0.876662	down
ENSMUSG00000027883	Gpsm2	111	108	114	74	78	146	364	119	109	147	0.802601	0.727871	0.864288	0.571317	0.571475	1.05278	2.80422	0.894461	0.808274	1.10976	0.0245678	0.787503	up
ENSMUSG00000027889	Ampd2	164	124	165	156	94	219	243	239	557	258	1.13131	0.801697	1.2033	1.16133	0.661269	1.51553	1.78914	1.72634	4.10789	1.87028	0.000100682	1.01307	up
ENSMUSG00000034161	Scx	86	61	105	97	39	156	199	144	77	85	2.09965	1.39373	2.67956	2.54006	0.94866	3.79405	5.17018	3.65526	1.90887	2.16126	0.0394747	0.732854	up
ENSMUSG00000029373	Pf4	342	291	224	269	291	995	1155	221	254	556	14.6734	11.7265	10.1423	12.4761	12.7159	42.7389	52.9197	9.92521	11.2427	25.1171	0.00902138	1.06573	up
ENSMUSG00000034786	Gpsm3	110	93	110	97	103	201	366	138	158	119	2.07278	1.83132	2.17153	2.01335	1.97128	4.02822	7.66149	2.76793	3.06927	2.33676	0.00799098	0.842794	up
ENSMUSG00000020183	Cpm	721	735	736	733	260	327	312	409	432	606	3.51034	3.3579	3.77326	3.84563	1.28607	1.58855	1.61623	2.07306	2.15489	3.09675	0.0108726	-0.664501	down
ENSMUSG00000032788	Pdxk	425	270	366	282	205	516	605	256	1035	537	2.09493	1.24712	1.90162	1.50125	1.02611	2.54181	3.17972	1.31563	5.24515	2.78414	0.00291103	0.823352	up
ENSMUSG00000024210	Ip6k3	1871	2130	2043	1957	1886	1733	967	1203	1147	1702	20.2048	21.5931	23.2383	22.804	20.7268	18.6879	11.1282	13.5517	12.7152	19.3098	0.000903661	-0.64523	down
ENSMUSG00000057596	Trim30d	79	41	40	62	29	98	124	63	97	101	0.6052	0.296279	0.322199	0.509421	0.221498	0.803273	1.01105	0.499647	0.762042	0.821441	0.00142783	0.878894	up
ENSMUSG00000038500	Prr3	134	113	81	124	72	140	304	118	178	126	2.0357	1.35205	1.19696	1.99472	1.0068	1.519	5.12913	1.52074	2.29488	1.80178	0.0249785	0.651451	up
ENSMUSG00000067149	Jchain	48	21	27	32	24	46	986	2	70	50	0.871626	0.347569	0.497919	0.609584	0.430307	0.822213	19.0828	0.027659	1.30383	0.93994	0.0117117	2.84389	up
ENSMUSG00000029177	Cenpa	92	73	75	56	59	199	316	58	97	104	1.62344	1.4517	1.59236	1.1456	1.35462	4.16917	6.24157	1.14896	2.2867	2.14935	0.0113933	1.03552	up
ENSMUSG00000049103	Ccr2	107	116	135	153	69	477	658	61	214	155	0.771068	0.739095	0.762902	1.11921	0.503682	3.04944	3.86055	0.33103	1.57672	1.19584	0.00586105	1.34283	up
ENSMUSG00000026580	Selp	132	122	118	66	30	81	270	200	151	195	0.966905	0.837041	0.91044	0.517371	0.218188	0.594708	2.11277	1.52989	1.13577	1.50023	0.0212429	0.910442	up
ENSMUSG00000027188	Pamr1	321	200	173	155	91	551	416	265	320	455	2.83208	1.65635	1.60525	1.47153	0.816977	4.85767	3.91079	2.43543	2.89724	4.21616	0.000136726	1.04578	up
ENSMUSG00000006542	Prkag3	1032	983	1524	1383	1043	2098	1675	2686	1210	1816	9.34223	8.26235	14.4306	13.4695	9.58679	18.7493	16.5328	25.2356	11.4759	17.5435	0.0217704	0.612869	up
NewGene_1597	NewGene_1597	104	86	96	78	19	7	0	15	23	67	0.668467	0.520959	0.674694	0.557908	0.178823	0.058627	0	0.151238	0.228595	0.455691	0.017046	-1.84577	down
NewGene_1596	NewGene_1596	75	79	45	65	45	119	137	134	83	91	0.785168	0.821842	0.566405	0.832882	0.683014	1.28821	1.38746	1.37166	0.870886	0.997381	0.0034923	0.818548	up
ENSMUSG00000044641	Pard6b	63	71	45	64	37	28	22	28	39	34	0.465055	0.493007	0.349945	0.508426	0.272809	0.206193	0.174355	0.2133	0.295771	0.262472	0.000602996	-0.968427	down
ENSMUSG00000040345	Arhgap9	61	29	29	28	32	94	318	36	65	55	0.804652	0.306512	0.395942	0.343625	0.367467	1.21022	4.40552	0.420104	0.864727	0.737382	0.0036767	1.5861	up
ENSMUSG00000041961	Znrf3	142	124	34	129	87	171	176	148	182	201	0.568751	0.472731	0.206161	0.564417	0.355629	0.697411	0.757284	0.630462	0.769661	0.870502	0.0264193	0.691194	up
ENSMUSG00000071036	Gm10309	114	134	98	129	435	31	92	49	50	81	1.43653	1.57727	1.29159	1.74479	5.57984	0.388949	1.2258	0.6344	0.635935	1.06848	0.000390764	-1.79271	down
ENSMUSG00000030747	Dgat2	5063	1800	1153	3913	2896	6290	11095	1297	27576	1925	56.6401	18.8893	13.5736	47.2108	32.9615	70.2845	132.283	15.1262	316.58	22.6065	0.0381086	1.55042	up
ENSMUSG00000031165	Was	47	30	25	24	8	41	167	26	44	40	0.560306	0.336051	0.312635	0.303648	0.091349	0.486176	2.12201	0.319653	0.538819	0.498525	0.0301373	1.2064	up
ENSMUSG00000038296	Galnt18	458	395	426	371	198	225	192	183	370	319	4.57192	3.69996	4.48508	4.00192	2.01341	2.24482	2.02957	1.89005	3.79403	3.3401	0.00645496	-0.601618	down
ENSMUSG00000020669	Sh3yl1	36	33	19	28	28	63	77	23	75	45	0.515493	0.443586	0.281522	0.425993	0.400004	0.895966	1.1753	0.332155	1.10977	0.675307	0.0171179	0.862787	up
ENSMUSG00000055301	Adh7	54	46	25	42	28	107	37	46	81	94	0.39428	0.317715	0.188069	0.33145	0.208266	0.780916	0.289299	0.347861	0.606258	0.726264	0.0200124	0.820667	up
ENSMUSG00000004642	Slbp	424	309	265	357	250	426	888	257	622	436	5.63086	3.87475	3.70734	5.15643	3.3663	5.63756	12.5414	3.59539	8.49	6.11389	0.0223595	0.61832	up
ENSMUSG00000059842	Zfp341	80	95	91	83	89	52	27	32	95	65	0.609332	0.679091	0.731607	0.679257	0.69411	0.39655	0.213541	0.249309	0.747068	0.521256	0.011747	-0.826661	down
ENSMUSG00000000486	Septin1	50	35	37	57	31	79	211	56	105	59	0.922258	0.576172	0.662117	1.04969	0.534485	1.37799	4.30583	0.979571	1.97715	1.05159	0.00230573	1.19657	up
ENSMUSG00000050505	Pcdh20	38	19	15	35	7	50	32	22	53	61	0.181041	0.083015	0.073188	0.181323	0.032785	0.240003	0.164022	0.106746	0.258314	0.304415	0.0487402	0.874982	up
ENSMUSG00000056486	Chn1	322	251	277	277	117	369	464	246	709	255	2.71006	1.8326	2.58862	2.13487	0.799999	2.47486	3.33774	1.71928	5.06113	1.95811	0.0286961	0.635003	up
ENSMUSG00000056481	Cd248	439	424	475	427	175	993	552	412	453	703	4.26238	3.86463	4.85728	4.46754	1.72432	9.62899	5.70906	4.16801	4.51482	7.16928	0.0255721	0.622117	up
ENSMUSG00000056220	Pla2g4a	105	65	71	38	50	202	213	82	86	90	0.929347	0.539176	0.659647	0.353703	0.449751	1.78388	2.00447	0.752444	0.778205	0.835521	0.0103412	0.967009	up
ENSMUSG00000025395	Prim1	44	61	48	55	33	74	174	74	105	60	0.681384	0.910859	0.802127	0.940313	0.52418	1.16509	2.95876	1.22107	1.71061	1.00362	0.00566012	0.933413	up
ENSMUSG00000020083	Fam241b	27	28	22	39	20	60	41	64	38	57	0.395752	0.539728	0.389622	0.964981	0.328319	0.878152	0.624485	1.06316	0.551664	1.43383	0.00855155	0.877328	up
ENSMUSG00000020086	Macroh2a2	55	33	51	58	38	108	76	54	118	83	0.630427	0.353085	0.624148	0.720612	0.448487	1.24472	0.940367	0.64488	1.39952	1.0136	0.00250147	0.803793	up
ENSMUSG00000031824	6430548M08Rik	832	1088	947	667	752	437	702	430	350	656	3.83691	4.64062	4.59058	3.27088	3.49835	1.98084	3.42997	2.03911	1.63994	3.14282	0.000469366	-0.824734	down
ENSMUSG00000031827	Cotl1	218	138	152	153	167	475	864	187	225	268	3.45038	2.04208	2.52726	2.61396	2.68162	7.50518	14.595	3.09111	3.6486	4.44825	0.00192882	1.19292	up
ENSMUSG00000045659	Plekha7	32	45	26	32	8	49	55	60	44	71	0.15081	0.202928	0.136988	0.170422	0.039061	0.246065	0.293522	0.322493	0.216922	0.375587	0.0154754	0.924538	up
ENSMUSG00000024169	Ift140	96	71	91	101	56	104	176	71	196	152	0.42468	0.282951	0.421027	0.465508	0.246709	0.442722	0.861797	0.324032	0.907034	0.679019	0.0143437	0.652206	up
NewGene_9455	NewGene_9455	127	136	89	149	122	113	72	69	91	73	2.02764	2.09903	1.59239	2.57738	2.32092	2.06047	1.34591	1.30993	1.43423	1.20858	0.00443924	-0.670452	down
ENSMUSG00000007659	Bcl2l1	1470	1606	858	1457	888	700	689	781	1393	774	14.7222	15.6126	9.08979	15.5767	9.05218	7.15361	7.57212	8.20366	14.699	8.1561	0.00607762	-0.617287	down
ENSMUSG00000036894	Rap2b	228	85	115	148	106	190	342	158	331	203	0.848874	0.295607	0.447469	0.594404	0.399634	0.706485	1.35667	0.61284	1.26281	0.793628	0.00719909	0.763583	up
ENSMUSG00000023905	Tnfrsf12a	2006	2720	1130	961	1367	1061	863	677	648	945	51.7161	66.3654	30.6387	26.7186	35.792	27.4571	23.6466	18.1393	17.0857	25.5426	0.000177146	-1.04379	down
ENSMUSG00000031980	Agt	632	349	349	403	354	331	214	209	300	372	8.4507	4.37923	4.9063	5.80318	4.81104	4.4123	3.03888	2.91656	4.10927	5.21687	0.00209338	-0.632649	down
ENSMUSG00000031673	Cdh11	67	38	16	76	14	56	294	63	50	39	0.299458	0.159084	0.072268	0.364186	0.062771	0.24822	1.40226	0.294348	0.229441	0.181231	0.0482073	1.23314	up
ENSMUSG00000074794	Arrdc3	3291	6579	1386	3251	7023	3353	2065	2908	2065	2983	20.2981	38.0957	9.00608	21.6224	44.0875	20.6562	13.4726	18.7068	13.0703	19.309	0.0401586	-0.818986	down
ENSMUSG00000022225	Cma1	81	76	41	53	78	473	129	50	103	160	1.90278	1.64592	0.998669	1.33564	1.86934	11.087	3.169	1.22725	2.4716	3.92885	0.00675512	1.35875	up
ENSMUSG00000029238	Clock	994	1005	828	750	502	448	515	524	761	522	2.5796	2.44897	2.78568	2.09839	1.32535	1.1592	1.42361	1.41818	2.02786	1.427	0.000417004	-0.629431	down
ENSMUSG00000028542	Slc6a9	215	205	166	138	164	286	383	268	267	393	1.56822	1.39798	1.40197	1.08059	1.20791	2.14252	3.00281	2.04067	1.99106	3.00786	0.000108255	0.759428	up
ENSMUSG00000000682	Cd52	57	44	34	46	60	222	455	28	79	52	2.76817	2.0075	1.71477	2.43126	2.98425	10.8996	23.8251	1.4353	3.94348	2.64559	0.00597488	1.67516	up
ENSMUSG00000002020	Ltbp2	52	13	21	41	25	74	120	12	495	16	0.192481	0.044885	0.080604	0.163777	0.093194	0.272668	0.475926	0.046133	1.8972	0.062628	0.00659397	2.07921	up
ENSMUSG00000036661	Dennd3	251	250	273	215	112	127	114	126	181	134	1.19809	1.12015	1.36864	1.10429	0.543956	0.605264	0.5766	0.625963	0.883388	0.670065	0.000504456	-0.759104	down
ENSMUSG00000021200	Asb2	20819	26470	17608	17255	16203	13581	7722	13653	7472	20008	195.987	234.796	174.679	175.332	155.168	132.771	78.379	134.068	72.6253	198.112	0.00947879	-0.725753	down
ENSMUSG00000028789	Azin2	78	56	56	65	39	87	96	52	183	133	0.94847	0.644051	0.722456	0.8525	0.476688	1.0546	1.24034	0.663382	2.28882	1.70189	0.00723751	0.801662	up
ENSMUSG00000032352	Lrrc1	55	54	56	65	25	78	140	55	91	85	0.442433	0.405176	0.477035	0.567006	0.205534	0.623865	1.20741	0.459412	0.752345	0.721723	0.0137217	0.741616	up
ENSMUSG00000024663	Rab3il1	270	307	287	310	137	661	665	336	382	565	2.4818	2.48316	3.24763	2.11617	1.05092	5.32897	4.95666	4.09336	3.62791	4.54847	0.000167737	0.924258	up
ENSMUSG00000024664	Fads3	941	371	455	838	341	1648	1715	340	3228	518	6.49222	2.38966	3.2833	6.19886	2.37746	11.2904	12.6704	2.42942	22.7445	3.72835	0.0080674	1.23605	up
ENSMUSG00000073940	Hbb-bt	4229	5307	5020	3172	4654	8231	24741	5966	5203	6040	152.198	179.276	190.299	123.132	170.433	295.807	949.152	223.921	192.174	228.289	0.00758177	1.0633	up
ENSMUSG00000027318	Adam33	88	64	66	98	47	141	145	86	102	105	0.768464	0.488437	0.667177	0.911188	0.396376	1.14699	1.4701	0.74387	0.972364	0.938125	0.0123896	0.604451	up
ENSMUSG00000027313	Chac1	8554	15636	6648	14352	12733	6548	4274	10149	4051	9038	132.214	226.835	108.212	239.263	200.265	101.059	70.4099	163.594	64.2479	146.705	0.0154815	-0.83828	down
ENSMUSG00000028996	Rbp7	444	291	338	265	696	147	122	96	327	97	18.125	11.1423	14.5284	11.6779	28.9172	5.98249	5.28664	4.091	13.7156	4.15804	9.10351e-05	-1.54921	down
ENSMUSG00000024501	Dpysl3	243	311	258	228	148	344	473	348	220	486	1.12108	1.34539	1.2515	1.13459	0.693635	1.58589	2.32347	1.67562	1.04256	2.35417	0.0202175	0.5928	up
ENSMUSG00000056708	Ier5	1241	1397	1089	1158	977	627	688	627	598	823	9.58173	10.1216	8.85388	9.64229	7.67404	4.83231	5.66255	5.04804	4.73615	6.67135	2.77937e-10	-0.883477	down
ENSMUSG00000033313	Fbxl8	23	15	38	28	18	51	77	32	75	36	0.302887	0.175234	0.532619	0.395481	0.232695	0.666377	1.07234	0.438491	1.00907	0.494139	0.00615896	1.04981	up
ENSMUSG00000011179	Odc1	20291	23507	19412	18784	43315	18220	14604	20006	9536	15171	240.946	263.357	243.614	240.978	526.07	218.793	188.235	249.586	116.337	188.648	0.0165558	-0.816098	down
ENSMUSG00000023505	Cdca3	39	46	57	35	26	68	264	45	32	56	0.694795	0.636192	0.766563	0.471974	0.327316	0.939924	3.72675	0.594624	0.412589	0.84111	0.0396247	1.12134	up
ENSMUSG00000022676	Snai2	110	72	85	71	24	116	151	87	118	105	1.37249	0.835661	1.11504	0.954574	0.297953	1.43964	2.01263	1.12496	1.50885	1.37629	0.0398202	0.626457	up
ENSMUSG00000042607	Asb4	872	1077	596	820	478	443	186	475	427	587	6.7516	7.78277	4.82808	6.80992	3.74328	3.40141	1.52062	3.81386	3.36979	4.80107	0.00154142	-0.918167	down
ENSMUSG00000027438	Napb	997	1189	791	860	653	548	489	549	696	751	5.84616	6.54959	4.8876	5.31456	3.80877	3.20527	2.98363	3.27922	4.18338	4.6205	8.76379e-05	-0.64702	down
ENSMUSG00000073878	Gm13304	63	89	58	84	46	211	147	168	128	148	1.90248	2.50509	1.82223	2.70957	1.40397	6.35082	4.72332	5.26794	3.9586	4.68762	4.23965e-06	1.17567	up
ENSMUSG00000066442	Mthfs	122	82	97	80	85	194	212	148	166	91	3.75514	2.38208	3.1484	2.65265	2.6559	5.98022	6.98202	4.81097	5.26437	2.94582	0.00649967	0.72298	up
ENSMUSG00000100235	Gm28557	53	54	0	10	4	4	318	175	244	10	0.341591	0.327722	0	0.069121	0.024551	0.025242	2.2022	1.18563	1.62635	0.063717	0.0448948	2.64318	up
ENSMUSG00000048087	Gm4737	277	232	177	183	972	263	138	185	198	216	3.34382	2.63232	2.25098	2.37432	11.9494	3.17318	1.77656	2.3205	2.44903	2.73914	0.0282371	-1.09554	down
ENSMUSG00000031016	Wee1	161	144	103	137	131	326	422	304	334	283	1.18571	0.996175	0.800347	1.08796	0.982983	2.40614	3.32171	2.34173	2.53482	2.19801	8.92574e-11	1.21991	up
ENSMUSG00000021622	Ckmt2	40143	74798	32727	35800	31177	23503	22039	33450	24003	39866	683.513	1195.4	586.917	657.501	540.201	399.586	399.992	594.021	419.459	712.88	0.0171226	-0.654128	down
ENSMUSG00000046070	Igfals	215	77	107	175	105	154	205	201	493	146	2.0642	0.695697	1.08094	1.81607	1.0228	1.47631	2.09924	2.01646	4.87126	1.46797	0.0421511	0.733035	up
ENSMUSG00000021702	Thbs4	1621	2194	1553	1254	866	3112	3011	4221	1704	5755	12.8193	16.2894	12.9344	10.694	6.96609	24.5821	25.3884	34.8311	13.8352	47.8146	0.000128966	1.20411	up
ENSMUSG00000021579	Lrrc14b	1380	1356	1098	831	2100	854	266	763	486	1626	12.6722	11.6866	10.6144	8.22953	19.6254	7.83141	2.5976	7.3017	4.57626	15.675	0.0339778	-0.896895	down
ENSMUSG00000031732	Phlpp2	198	123	155	183	68	206	314	119	319	239	0.637256	0.370411	0.524705	0.633525	0.220311	0.661237	1.07816	0.39888	1.05354	0.806896	0.0221514	0.64199	up
NewGene_7279	NewGene_7279	29	34	35	44	48	80	86	69	42	67	0.779715	0.84667	0.847624	1.27107	1.20725	2.12055	2.1196	1.69755	1.28582	2.0634	0.024642	0.757183	up
ENSMUSG00000060548	Tnfrsf19	893	1304	918	1340	547	312	669	261	735	951	5.65288	7.74399	6.13882	9.15645	3.68397	1.98176	4.55383	1.82268	4.79259	6.33322	0.00635449	-0.877144	down
ENSMUSG00000029304	Spp1	186	147	163	129	22	54	4357	55	199	254	3.25709	2.39997	2.95192	2.4588	0.361586	0.934424	82.6805	1.01244	3.61979	4.69148	0.0116342	2.8893	up
ENSMUSG00000042529	Kcnj12	1049	1743	1165	979	1042	598	510	916	514	1056	11.553	17.2896	13.5317	11.6188	11.2879	6.5924	5.57629	10.5388	5.79465	12.148	0.00403794	-0.806916	down
ENSMUSG00000000290	Itgb2	196	117	91	89	84	184	970	47	153	144	1.66615	0.930396	0.815611	0.81221	0.726786	1.56036	8.86336	0.413938	1.33261	1.2848	0.0293322	1.30168	up
ENSMUSG00000059493	Nhs	38	13	57	27	8	82	35	83	45	101	0.106593	0.032492	0.169634	0.08121	0.023394	0.233549	0.104717	0.24772	0.13085	0.304469	0.0146664	1.24742	up
ENSMUSG00000055866	Per2	532	377	467	399	388	706	727	662	1133	896	2.30739	1.53137	2.13115	1.86652	1.71176	3.05553	3.35992	2.99319	5.04173	4.07816	5.92379e-08	0.831828	up
ENSMUSG00000057003	Myh4	382361	425509	438938	430086	324945	219764	213024	313021	204860	381218	1617.83	1688.92	1956.64	1961.41	1398.8	929.477	961.619	1383.11	889.313	1693.53	0.00213475	-0.658624	down
ENSMUSG00000054675	Tmem119	83	66	77	79	37	142	201	115	119	135	0.935125	0.698911	0.909401	0.952021	0.416886	1.59771	2.40874	1.35023	1.36707	1.58916	5.38889e-05	0.996114	up
ENSMUSG00000034898	Filip1	1144	1590	874	1013	856	616	494	712	707	1202	6.6783	8.62094	5.23668	6.27007	5.01473	3.47672	2.90919	4.18847	4.13636	7.49178	0.0105387	-0.637661	down
ENSMUSG00000024052	Lpin2	244	284	203	188	216	90	171	83	200	175	1.09111	1.192	0.955938	0.904997	0.983543	0.400625	0.813548	0.384581	0.926169	0.82442	0.00227396	-0.778312	down
ENSMUSG00000044456	Rin3	581	672	608	735	308	371	470	308	341	525	3.78443	4.10014	4.15975	5.15576	2.04686	2.40436	3.25139	2.08452	2.27021	3.59633	0.00491464	-0.596496	down
ENSMUSG00000001865	Cpa3	87	47	19	66	64	377	129	20	92	185	1.5026	0.753937	0.335343	1.23458	1.12363	6.55615	2.3954	0.363879	1.64759	3.39097	0.0170666	1.39193	up
ENSMUSG00000021250	Fos	334	218	656	331	178	168	234	95	56	209	4.0014	2.44918	8.29157	4.28104	2.16946	2.00809	2.98152	1.18452	0.682472	2.62939	0.00270866	-1.24212	down
ENSMUSG00000027907	S100a11	1489	917	1153	1165	953	2064	3883	1117	1901	1105	73.6998	42.6046	60.0829	62.1731	47.9927	102.035	204.894	57.6584	96.6019	57.4273	0.0159716	0.741025	up
ENSMUSG00000062329	Cytl1	237	466	270	281	76	308	2851	295	363	371	6.13525	11.3577	7.3831	7.84832	1.99033	7.97358	78.9219	7.96669	9.6572	10.1168	0.0327371	1.60015	up
ENSMUSG00000030161	Gabarapl1	6969	8453	4233	5582	7282	4414	4046	2810	6189	5033	97.0461	110.425	62.0284	83.7917	103.118	61.2863	59.9507	40.736	88.3618	73.598	0.00362201	-0.660464	down
ENSMUSG00000059412	Fxyd2	74	57	70	41	61	198	237	63	71	112	2.95114	2.10935	2.93371	1.75801	2.46445	7.91154	10.1068	2.6221	2.60735	4.67821	0.00698477	1.07015	up
ENSMUSG00000079168	Cd209g	69	33	69	37	83	146	165	72	59	127	1.48899	0.667843	1.56877	0.856587	1.82577	3.14814	3.79826	1.60815	1.29346	2.88597	0.0357056	0.845383	up
ENSMUSG00000050271	Prag1	394	250	356	284	201	145	144	156	333	200	2.08086	1.23783	1.983	1.62128	1.0811	0.764924	0.807048	0.860767	1.80468	1.11132	0.00454324	-0.692172	down
ENSMUSG00000018648	Dusp14	89	94	164	131	38	372	330	288	193	235	1.53817	1.67934	3.03955	2.50466	0.62095	6.50508	6.13706	5.25041	3.45791	4.30015	2.79223e-05	1.41612	up
ENSMUSG00000060224	Pyroxd2	37	23	36	14	26	57	70	36	66	35	0.299946	0.170591	0.300449	0.10909	0.208426	0.45105	0.598849	0.305673	0.545473	0.288327	0.0187784	0.859418	up
ENSMUSG00000034387	Ssu2	70	83	63	82	36	46	4	19	41	33	1.43046	1.62991	1.35688	1.82668	0.72654	0.919435	0.072352	0.398255	0.845067	0.707597	0.00671677	-1.3084	down
ENSMUSG00000047648	Fbxo30	1092	1773	881	881	851	702	613	659	703	801	5.4564	8.32041	4.63922	4.75092	4.32874	3.50407	3.26337	3.43449	3.60558	4.20206	0.000587309	-0.736897	down
ENSMUSG00000039634	Zfp189	233	226	209	277	214	124	131	122	165	186	1.98795	1.80834	1.87342	2.545	1.85369	1.05383	1.1901	1.08109	1.43712	1.65851	7.12241e-06	-0.768991	down
NewGene_6528	NewGene_6528	611	106	140	136	129	132	123	128	109	93	15.1047	2.46049	3.6283	3.62018	3.24103	3.24752	3.22829	3.28138	2.746	2.39902	0.0289509	-0.939083	down
ENSMUSG00000052374	Actn2	12478	20246	9368	11847	12611	6782	10182	5692	8587	9441	104.78	159.582	82.8533	107.305	107.765	56.8609	91.1397	49.8517	74.0078	83.2567	0.000248413	-0.818655	down
ENSMUSG00000037902	Sirpa	592	453	463	480	275	876	1358	406	773	661	3.76536	2.76901	3.20233	3.31927	1.84365	6.01092	10.2232	2.74895	5.06911	4.59539	0.00362689	0.772405	up
ENSMUSG00000068606	Gm4841	47	42	172	59	32	386	75	223	52	156	0.412466	0.343032	1.61087	0.561417	0.285929	3.43415	0.710538	2.07137	0.468085	1.45323	0.0245994	1.30405	up
ENSMUSG00000026676	Ccdc3	407	387	316	396	206	452	730	349	1128	614	3.85309	3.43486	3.14606	4.04272	1.98585	4.27485	7.37047	3.44203	10.9685	6.10116	0.00125237	0.835233	up
ENSMUSG00000035172	Plekhh3	726	548	651	633	267	792	827	874	913	1208	7.0605	5.06888	6.42343	6.59399	2.38203	7.68745	8.20413	8.60084	8.78214	11.6825	0.00166382	0.654909	up
ENSMUSG00000024190	Dusp1	3113	1683	6437	2685	1885	2500	2056	1457	1342	2654	39.5719	20.0824	86.1938	36.8131	24.38	31.7352	27.8525	19.313	17.5092	35.4341	0.0298826	-0.737514	down
ENSMUSG00000031250	Tnmd	78	41	55	24	105	129	233	286	81	328	1.44608	0.711124	1.07347	0.472015	1.99058	2.39677	4.62852	5.57423	1.54857	6.43014	0.000510733	1.69442	up
ENSMUSG00000034751	Mast4	1805	2028	1840	1822	703	814	691	1060	924	1546	4.30417	4.52718	4.61258	4.72784	1.70894	1.93164	1.75205	2.70984	2.2539	3.86098	0.00509091	-0.753525	down
ENSMUSG00000028211	Trp53inp1	2405	2750	875	1547	1951	840	921	869	1660	1224	11.2569	12.0814	4.31024	7.80925	9.29341	3.92382	4.59468	4.23901	7.97609	6.01503	0.00168761	-0.89955	down
ENSMUSG00000028214	Gem	212	120	183	113	88	365	229	145	163	222	2.67342	1.40593	2.41383	1.53567	1.11439	4.62362	3.06867	1.89743	2.09809	2.92093	0.0471004	0.587652	up
ENSMUSG00000030862	Cpxm2	208	170	174	222	143	241	394	298	236	433	1.53064	1.30929	1.32228	1.73001	1.04591	1.73937	3.03189	2.24627	1.74721	3.28283	0.000951036	0.73216	up
ENSMUSG00000054293	P2ry10b	39	10	12	24	6	36	72	38	19	39	0.324719	0.07157	0.103715	0.2046	0.042801	0.29188	0.635279	0.328163	0.160444	0.333704	0.0296298	1.15994	up
ENSMUSG00000071713	Csf2rb	248	90	118	120	170	177	424	110	549	185	1.27631	0.433395	0.637416	0.6676	0.890466	0.907715	2.33323	0.591842	2.90502	0.994373	0.0456938	0.820683	up
ENSMUSG00000030087	Klf15	2767	3925	1945	3264	3324	1705	1631	1684	3156	2506	30.0176	41.8398	21.8868	38.4718	38.3458	18.2849	18.6217	18.9295	36.1785	29.6871	0.00783117	-0.636654	down
ENSMUSG00000035305	Ror1	181	122	204	133	69	65	86	91	67	89	0.791946	0.499518	0.942743	0.628765	0.304313	0.281793	0.402514	0.414085	0.298894	0.409155	0.00191462	-0.877198	down
ENSMUSG00000022270	Retreg1	21602	33894	17622	19383	14975	15464	10662	10452	11082	15356	169.805	248.607	147.475	163.415	119.441	121.399	89.6725	85.631	89.3147	126.241	8.06554e-05	-0.848009	down
ENSMUSG00000028532	Cachd1	278	123	210	242	97	260	376	179	589	229	1.22066	0.502691	0.968078	1.14301	0.431741	1.13921	1.75606	0.814953	2.65063	1.05147	0.031407	0.698394	up
ENSMUSG00000004328	Hif3a	95	117	39	80	56	48	21	26	52	74	0.371101	0.430638	0.158849	0.340875	0.223671	0.18898	0.088301	0.106459	0.210414	0.304253	0.0214289	-0.903445	down
ENSMUSG00000036144	Meox2	803	640	870	630	298	1088	1195	1235	1197	1416	8.60665	6.43826	9.82153	7.27491	3.24245	11.6384	13.6478	13.8032	13.1659	15.934	5.39972e-05	0.870092	up
NewGene_5853	NewGene_5853	119	26	14	15	36	82	3050	2	113	83	4.25587	0.644782	0.368276	0.412849	1.30685	2.1729	89.0866	0.054807	4.10131	2.24587	0.0034292	3.94392	up
NewGene_1575	NewGene_1575	156	109	357	211	83	500	449	737	238	328	1.94466	1.42884	5.72737	3.27946	1.23346	7.1958	6.7881	10.3275	3.3936	4.46842	0.00212102	1.28386	up
ENSMUSG00000038244	Mical2	1979	2237	2584	1779	2857	1739	1034	2157	1146	1798	13.7945	14.5653	21.262	13.3384	25.9309	15.3752	10.003	20.0434	6.92402	13.2257	0.0285949	-0.629965	down
ENSMUSG00000021750	Fam107a	584	746	299	373	428	206	55	165	310	238	4.55012	5.52184	2.40936	3.23464	3.48886	1.64028	0.439988	1.29933	2.54801	1.88578	0.000142218	-1.4222	down
ENSMUSG00000004698	Hdac9	55	151	61	50	80	145	235	171	130	165	0.174505	0.747281	0.205754	0.171086	0.424338	0.796517	1.38342	0.984016	0.694572	0.892621	0.00540469	0.996908	up
ENSMUSG00000026012	Cd28	153	100	246	262	153	339	294	396	177	311	0.890403	0.543891	1.50714	1.64393	0.90467	1.96714	1.82141	2.40389	1.05411	1.89705	0.0405088	0.672542	up
ENSMUSG00000023067	Cdkn1a	1489	2768	915	1803	1235	721	576	295	904	502	19.8266	34.4064	12.7429	25.7203	16.6242	9.52732	8.11729	4.12361	12.3753	6.9755	2.50091e-07	-1.56479	down
ENSMUSG00000046794	Ppp1r3b	96	38	22	60	28	60	137	26	465	51	0.552352	0.205182	0.131284	0.370409	0.168767	0.344546	0.839904	0.154309	2.75213	0.304868	0.021258	1.47644	up
ENSMUSG00000066687	Zbtb16	1550	1735	1122	1060	1272	685	281	467	812	1307	7.83212	8.2037	5.92585	5.69485	6.43601	3.38351	1.47679	2.41652	4.22334	6.90999	0.00125493	-1.04046	down
ENSMUSG00000037649	H2-DMa	125	97	114	112	94	372	229	74	175	142	2.54694	1.97957	2.70211	2.52653	1.99707	8.43533	5.56045	1.1688	3.44416	3.17966	0.0271444	0.771414	up
ENSMUSG00000055116	Arntl	486	799	303	396	350	168	134	114	192	164	4.63453	7.14188	3.1516	3.7677	3.09361	1.42404	1.21065	1.00864	1.67326	1.7234	6.33665e-11	-1.68815	down
ENSMUSG00000023267	Gabrr2	49	43	66	51	55	181	113	64	104	45	0.653217	0.589555	0.905509	0.71612	0.79122	2.42117	1.87693	0.86991	1.45938	0.637752	0.0272571	0.834921	up
ENSMUSG00000029650	Slc46a3	237	173	178	167	144	363	382	239	428	307	2.48758	1.74342	2.00525	1.92593	1.64982	3.98505	4.40926	2.83148	4.68416	3.49776	1.58353e-07	0.84635	up
ENSMUSG00000042515	Pwwp3b	93	50	120	73	46	145	190	122	104	116	0.508174	0.257419	0.689569	0.431177	0.25319	0.793794	1.10892	0.698326	0.582408	0.665632	0.0120619	0.766313	up
ENSMUSG00000062488	Ifit3b	99	50	91	86	32	136	164	116	154	158	1.2496	0.589873	1.19985	1.16416	0.40765	1.70816	2.20043	1.52519	1.99149	2.094	0.000243901	0.964895	up
ENSMUSG00000021699	Pde4d	3852	3560	3212	3233	2591	1520	587	1551	1710	2716	27.1782	22.6385	21.8368	22.8473	18.2782	10.1935	5.12687	10.3824	12.9263	22.5904	0.000168398	-1.10909	down
ENSMUSG00000029449	Rhof	93	32	30	77	46	130	175	48	253	56	0.545746	0.176098	0.184897	0.48443	0.271227	0.760398	1.09414	0.28957	1.52474	0.343463	0.0137068	1.14782	up
ENSMUSG00000042759	Apobr	54	37	40	30	37	47	180	56	102	42	0.369192	0.246652	0.290436	0.244069	0.264454	0.329124	1.42232	0.415145	0.743934	0.303116	0.0178309	1.0154	up
ENSMUSG00000020120	Plek	114	92	94	66	73	238	782	45	118	121	0.700477	0.527563	0.604735	0.439568	0.454982	1.46012	5.13631	0.287596	0.741292	0.779628	0.00964628	1.47781	up
ENSMUSG00000044345	Marveld1	1075	735	839	1047	533	1097	1469	588	2580	1121	8.55702	5.56381	7.14087	9.15423	4.36818	8.94097	12.8089	5.013	21.3386	9.39476	0.0403281	0.589903	up
NewGene_8014	NewGene_8014	30	23	34	17	20	53	40	49	46	40	0.356053	0.255561	0.430331	0.210969	0.243546	0.628928	0.503605	0.613989	0.561782	0.498041	0.0111414	0.805727	up
ENSMUSG00000055675	Kbtbd11	146	69	26	85	111	124	252	44	632	111	0.529318	0.232665	0.097151	0.344222	0.407682	0.467464	0.972198	0.163668	2.35065	0.44158	0.0324952	1.24238	up
ENSMUSG00000056328	Myh1	25423	49483	22057	29441	26787	12769	14711	14596	22742	24602	106.985	195.539	97.713	133.544	114.697	53.0488	65.2448	63.9311	98.1969	108.792	0.000387609	-0.886114	down
ENSMUSG00000039883	Lrrc17	114	92	77	100	22	159	138	111	88	200	1.33364	1.01251	0.944768	1.26654	0.256764	1.85806	1.72241	1.35737	1.05941	2.46055	0.0360801	0.746174	up
ENSMUSG00000049281	Scn3b	119	92	116	106	32	51	32	58	64	66	0.720822	0.523699	0.741909	0.713639	0.198333	0.307684	0.20268	0.363136	0.399977	0.421496	0.0141473	-0.823997	down
ENSMUSG00000038594	Cep85l	6126	6398	5115	5402	6522	2777	2870	1648	3141	4267	20.8727	20.4622	18.3557	19.8561	22.6158	9.44741	10.4239	5.85515	10.9836	15.2701	5.41902e-08	-1.13623	down
ENSMUSG00000022330	Osr2	84	58	50	69	46	219	158	92	65	101	1.31528	0.854494	0.811928	1.08398	0.723137	3.31579	2.46896	1.5282	0.998843	1.67893	0.00460982	0.988839	up
ENSMUSG00000043639	Rbm20	2063	2258	2148	1741	436	509	220	562	1179	1035	11.2075	11.6205	12.2897	10.0193	2.32224	2.62472	1.20857	3.03135	6.54433	5.62004	0.000976126	-1.37111	down
ENSMUSG00000042271	Nxt2	354	245	204	266	173	466	545	181	608	254	3.6031	2.34236	2.18383	2.91966	1.79159	4.63781	5.99885	1.87963	6.33953	2.71463	0.0309046	0.633629	up
ENSMUSG00000026357	Rgs18	22	20	35	39	33	109	334	36	38	52	0.272915	0.22225	0.450066	0.523268	0.408133	1.35518	4.42409	0.46109	0.475172	0.678257	0.00248598	1.81972	up
ENSMUSG00000062526	Mppe1	96	99	48	75	29	103	233	106	254	134	0.964396	0.942201	0.502372	0.817617	0.297933	1.03911	2.51789	1.11158	2.64297	1.42141	0.000692118	1.18825	up
ENSMUSG00000051439	Cd14	112	90	61	94	125	223	338	28	439	147	1.7265	1.29287	0.986194	1.54927	1.95138	3.41977	5.54992	0.446632	6.93294	2.36538	0.0256695	1.11643	up
ENSMUSG00000013707	Tnfaip8l2	44	24	35	32	54	104	100	36	77	73	0.976763	0.499957	0.812632	0.769467	1.22988	2.32743	2.39129	0.836215	1.76857	1.72495	0.0129617	0.910654	up
ENSMUSG00000018774	Cd68	243	185	107	121	176	548	730	107	203	320	4.9823	3.56325	2.28907	2.69114	3.67229	11.2541	15.9949	2.29365	4.27571	6.92136	0.0118502	1.09478	up
NewGene_6904	NewGene_6904	45	24	27	20	29	53	79	38	52	38	1.64235	0.816817	1.0427	0.785672	1.09566	1.95273	3.12498	1.45278	1.98798	1.4681	0.0283718	0.757244	up
ENSMUSG00000020218	Wif1	11	8	24	15	25	124	332	93	45	183	0.115151	0.079439	0.268975	0.17124	0.2711	1.35958	3.89243	1.06432	0.502389	2.11657	9.77574e-09	3.09342	up
ENSMUSG00000037568	Vash2	35	19	28	19	26	37	107	52	39	34	0.221274	0.10885	0.179824	0.122156	0.160117	0.230676	0.714711	0.334537	0.246975	0.228567	0.0187178	1.0093	up
ENSMUSG00000039084	Chad	59	85	151	29	64	188	1699	153	96	700	0.8871	1.19037	2.38557	0.460285	0.979963	2.81664	27.2746	2.39673	1.48381	11.0699	0.000639933	2.75548	up
ENSMUSG00000050106	Tmc8	40	36	101	80	21	27	28	25	37	35	0.361378	0.30589	1.0128	0.794559	0.19468	0.244277	0.268588	0.235248	0.360503	0.333974	0.0251841	-0.946574	down
ENSMUSG00000000223	Drp2	374	395	320	186	82	115	169	136	113	133	1.32343	1.3141	1.24131	1.21774	0.293123	0.4049	0.636079	0.50005	0.78433	0.934534	0.00199841	-1.05635	down
ENSMUSG00000094686	Ccl21a	130	190	161	196	101	617	437	382	342	749	3.75875	5.1774	4.91349	6.11784	2.97748	17.9158	13.5197	11.564	10.1845	22.8762	4.40538e-10	1.6189	up
ENSMUSG00000096596	Gm10591	95	131	86	143	71	351	317	273	186	455	2.73902	3.55999	2.62884	4.48515	2.09334	10.19	9.83693	8.28022	5.53378	13.896	4.21176e-08	1.51765	up
ENSMUSG00000038332	Sesn1	2709	5681	2023	3370	4888	1640	1918	1232	1958	2446	22.8514	49.7494	18.9963	32.445	44.9633	10.8728	13.5802	11.229	15.7985	20.0194	0.000101798	-1.1657	down
ENSMUSG00000028642	Tmem269	50	43	36	51	28	83	89	79	61	59	0.837915	0.676889	0.63163	0.915062	0.464859	1.38139	1.58034	1.37527	1.05313	1.02994	0.00411822	0.77835	up
ENSMUSG00000028643	Svbp	277	315	254	283	288	597	611	417	363	336	9.50388	10.0482	8.93598	10.3251	10.1249	20.4039	22.2312	14.9311	12.8003	12.1441	0.00731724	0.625934	up
NewGene_4032	NewGene_4032	815	876	1128	527	937	701	413	544	470	790	3.02308	3.17567	4.33752	2.11707	3.69893	2.62141	2.01397	2.08747	1.95706	3.32111	0.013418	-0.660174	down
ENSMUSG00000032925	Itgbl1	239	304	222	244	177	590	610	478	304	509	1.48204	1.7712	1.45055	1.63619	1.12059	3.6638	4.04286	3.09753	1.93911	3.32518	1.40779e-05	1.00534	up
ENSMUSG00000072676	Tmem254a	212	356	247	358	160	448	475	431	554	397	2.78817	4.80925	3.34303	4.55014	2.25652	5.71784	6.93994	5.29124	7.01395	4.90301	0.00105093	0.715236	up
ENSMUSG00000003477	Inmt	3208	3536	1717	3522	4014	9186	6186	3668	4475	5672	75.3598	77.966	42.4836	89.2259	95.9435	215.468	154.888	89.8551	107.892	139.932	0.0102012	0.74926	up
ENSMUSG00000046668	Cxxc5	707	488	660	622	225	1137	953	938	817	952	7.89224	5.06509	7.96263	7.45572	2.57286	12.5472	11.2659	11.1231	9.44798	11.4848	0.000834604	0.789974	up
ENSMUSG00000051041	Olfml1	162	86	62	137	49	254	164	86	403	158	2.42852	1.20222	0.977945	2.21177	0.741832	3.82386	2.61606	1.33884	6.25342	2.47	0.00811142	1.01849	up
ENSMUSG00000054626	Xlr	48	33	11	32	25	69	96	37	53	40	1.05815	0.746937	0.278949	0.836484	0.604117	1.68437	2.63085	0.775758	1.2804	0.922139	0.0270919	0.914104	up
ENSMUSG00000061068	Mcpt4	88	125	34	124	83	483	126	66	126	289	2.00516	2.6584	0.79965	3.05173	1.9212	11.007	3.0651	1.56638	2.9484	6.92295	0.0198383	1.15615	up
ENSMUSG00000096145	Vkorc1	341	248	354	443	328	651	790	430	600	406	11.5196	7.84456	12.5882	16.1589	11.2662	21.9782	28.4732	15.1465	20.8021	14.3972	0.0048421	0.650629	up
ENSMUSG00000031494	Cd209a	32	28	42	34	18	94	87	48	42	89	0.545542	0.437161	0.747101	0.61214	0.300106	1.59284	1.58159	0.842729	0.735364	1.59103	0.00077004	1.15146	up
ENSMUSG00000069920	B3gnt9	116	88	105	83	37	141	189	148	81	166	1.2396	0.824958	1.18284	0.897468	0.37433	1.48591	2.01856	1.54844	0.82799	1.8675	0.0213474	0.721994	up
ENSMUSG00000034255	Arhgap27	633	579	600	692	243	319	292	320	504	448	4.09729	3.52656	4.03523	4.78144	1.57153	2.08283	1.98051	2.12346	3.32903	3.12487	0.00790804	-0.610794	down
ENSMUSG00000059824	Dbp	3657	1907	5299	3827	1654	4434	5678	5366	6956	5564	51.3866	25.276	79.6643	57.709	23.7	62.4481	84.921	80.2567	100.653	82.5042	0.0078681	0.71289	up
ENSMUSG00000031842	Pde4c	290	245	283	321	100	138	82	68	176	272	2.36351	1.87306	2.42571	2.82345	0.827766	1.02765	0.646655	0.524406	1.38548	2.33231	0.0193882	-0.8378	down
ENSMUSG00000031849	Comp	36	127	130	55	56	147	1122	144	136	594	0.372916	1.33174	1.42445	0.73159	0.59301	1.52949	13.1166	1.66839	1.51029	6.85471	0.000100117	2.29378	up
ENSMUSG00000073791	Efcab7	36	16	46	25	2	24	87	47	71	54	0.381954	0.17522	0.547911	0.287555	0.020878	0.252686	1.18964	0.618032	0.801959	0.6062	0.0456224	1.1411	up
ENSMUSG00000039452	Snx22	59	53	111	66	28	71	214	110	93	125	0.578007	0.487644	1.16043	0.706817	0.28032	0.69585	2.26925	1.13943	0.94221	1.30089	0.0215828	0.891992	up
ENSMUSG00000029683	Lmod2	3604	8979	1660	1898	4146	2665	3350	1728	2674	2467	46.1387	107.908	22.3791	26.2077	54.0224	34.0649	45.7172	23.0673	35.1384	33.1628	0.0498049	-0.769652	down
ENSMUSG00000089832	Shkbp1	134	154	149	123	71	154	211	226	293	184	1.43616	1.5508	1.68318	1.41581	0.772663	1.6444	2.40913	2.52315	3.22047	2.06712	0.00339987	0.691273	up
ENSMUSG00000028480	Glipr2	62	98	108	86	106	174	450	63	121	141	0.669203	1.00312	1.23121	1.00997	1.16688	1.88601	5.22345	0.714487	1.34808	1.60942	0.0432693	0.911915	up
ENSMUSG00000027452	Acss1	2394	2954	1502	2166	1487	1135	1186	863	2382	1533	16.7384	19.3867	11.0602	16.3349	10.5792	7.9218	8.83436	6.29274	17.0964	11.2538	0.00555223	-0.670136	down
ENSMUSG00000027457	Snph	62	54	58	39	33	41	39	21	26	44	0.316545	0.268037	0.464409	0.21641	0.168543	0.206064	0.210711	0.111756	0.139084	0.232756	0.0491056	-0.604346	down
ENSMUSG00000030852	Tacc2	19434	29414	15645	16604	14828	11747	10354	10937	12220	17955	164.754	236.98	140.118	160.667	133.027	108.957	98.0875	99.2736	88.518	148.991	0.0011153	-0.688668	down
ENSMUSG00000026411	Tmem9	421	309	399	371	250	766	548	526	754	563	5.89379	4.05768	5.87857	5.61424	3.55703	11.3523	9.46763	7.68226	10.8922	8.52118	6.47838e-07	0.772867	up
NewGene_6172	NewGene_6172	117	30	40	55	47	154	289	44	118	80	1.37295	0.365812	0.49057	0.691912	0.563251	1.81655	4.04148	0.53601	1.42818	0.98891	0.0143892	1.17357	up
ENSMUSG00000031659	Adcy7	129	118	111	74	39	179	274	77	162	164	0.545645	0.469659	0.495526	0.337571	0.168106	0.758018	1.23959	0.337787	0.703197	0.73067	0.0198898	0.793388	up
ENSMUSG00000022206	Npr3	560	368	179	441	195	773	952	166	1879	288	2.213	1.30774	0.68903	1.85523	0.765569	2.91102	3.96951	0.634363	7.50437	1.19443	0.023192	1.11312	up
ENSMUSG00000035370	Gm49322	78	32	62	83	65	119	762	20	85	93	0.432722	0.160626	0.358431	0.492903	0.366838	0.664301	4.54608	0.110075	0.483535	0.546056	0.0171082	1.6468	up
NewGene_10407	NewGene_10407	174	105	130	104	302	95	49	30	85	34	1.14549	0.647212	0.898653	0.733656	2.01743	0.621049	0.343527	0.201692	0.572525	0.233628	0.000180896	-1.65372	down
ENSMUSG00000079465	Col4a3	134	122	75	89	36	65	30	36	44	74	0.395735	0.337661	0.230897	0.281324	0.105654	0.191569	0.092319	0.109293	0.130723	0.22928	0.00975258	-0.925002	down
ENSMUSG00000096727	Psmb9	302	145	170	217	144	390	414	146	607	241	6.18723	2.63874	3.57274	4.44045	2.77952	7.60821	8.25588	2.94685	11.9197	4.83797	0.013612	0.778925	up
ENSMUSG00000021226	Acot2	2220	2559	1243	1707	1107	1209	1401	749	1216	782	25.5786	27.6667	15.0821	21.2024	12.977	13.9018	17.205	8.99176	14.3716	9.45219	0.00081655	-0.793054	down
NewGene_5020	NewGene_5020	82	131	92	123	148	87	79	75	53	96	0.556282	0.850923	0.661366	0.907363	1.03044	0.596871	0.57865	0.535544	0.386048	0.692125	0.0259175	-0.676037	down
ENSMUSG00000038893	Fam117a	316	109	194	159	176	237	812	181	917	255	3.4417	1.11662	2.22836	1.87268	1.95517	2.57767	9.44943	2.05724	10.2664	2.91396	0.0050258	1.21351	up
NewGene_8199	NewGene_8199	78	74	96	84	153	241	305	163	134	90	4.04369	3.6146	5.24311	4.69695	8.08577	12.5125	16.8727	8.83449	7.11051	4.91471	0.0392113	0.816503	up
ENSMUSG00000032332	Col12a1	98	97	90	88	76	131	305	142	167	227	0.214505	0.344659	0.207839	0.778624	0.666635	0.285784	1.20632	0.485907	0.50711	0.52401	6.75764e-05	1.0241	up
ENSMUSG00000027330	Cdc25b	94	98	109	121	74	135	339	83	337	127	0.76423	0.749092	0.932379	1.06721	0.613377	1.10002	2.9594	0.70856	2.86582	1.08546	0.0109676	0.924229	up
ENSMUSG00000078670	Fam174b	42	49	25	38	16	37	78	56	66	87	0.388353	0.431017	0.243684	0.376916	0.148686	0.345968	0.782143	0.550411	0.634354	0.855655	0.0120309	0.867133	up
ENSMUSG00000031596	Slc7a2	2253	5266	3447	3128	4246	1557	2053	2529	2220	4196	7.21897	15.9885	13.7205	11.1395	14.109	6.08574	6.99793	8.48677	7.30175	14.2101	0.0314648	-0.668271	down
ENSMUSG00000037347	Chst7	119	72	109	115	52	161	111	138	143	212	1.36016	0.774767	1.31404	1.41311	0.601024	1.83665	1.35374	1.6482	1.67983	2.54398	0.0103301	0.6492	up
ENSMUSG00000037348	Paqr7	142	82	169	150	40	236	266	208	176	202	1.05053	0.544644	1.68168	1.44139	0.308113	1.6727	2.76572	1.92059	1.52296	1.95059	0.0066787	0.862717	up
ENSMUSG00000042628	Zfyve1	2132	3140	1711	2431	2328	1264	1199	1219	1544	2257	12.389	17.0088	10.9829	15.1771	14.2887	7.33674	7.31394	7.27517	9.19093	13.7476	0.00063034	-0.759835	down
ENSMUSG00000042622	Maff	278	490	305	345	524	280	306	174	248	226	3.62554	6.00366	4.23394	4.86527	7.07801	3.60694	4.19454	2.33441	3.33958	3.11688	0.00392404	-0.791235	down
ENSMUSG00000033855	Ston1	190	152	121	163	42	48	19	73	98	127	1.63381	1.27135	1.25707	1.59684	0.406092	0.405357	0.149226	0.645154	0.943028	1.20784	0.043457	-0.919899	down
ENSMUSG00000028268	Gbp3	217	129	186	200	116	321	452	191	408	293	2.16293	1.14188	1.96176	2.05673	1.1059	3.01574	4.53565	1.87755	4.13758	2.95327	0.000107092	0.886529	up
ENSMUSG00000048489	Depp1	4201	16748	830	5489	12803	1370	1360	1522	2167	764	79.6201	298.176	16.563	112.228	247.024	25.8901	27.5536	30.1257	42.0899	15.1908	0.000147211	-2.63021	down
ENSMUSG00000079197	Psme2	614	425	428	595	777	873	1110	724	1474	686	16.1048	10.4582	11.8535	16.8757	20.9049	22.9159	31.111	19.8526	39.7891	18.9429	0.0171015	0.641302	up
ENSMUSG00000047786	Lix1	51	17	17	15	17	37	52	49	66	24	0.47871	0.122302	0.139805	0.125016	0.135324	0.294109	0.448471	0.480817	0.622081	0.230901	0.0381842	0.91684	up
ENSMUSG00000018012	Rac3	33	22	24	58	19	41	90	50	66	56	0.770357	0.478659	0.578235	1.45288	0.445887	0.956122	2.23167	1.21401	1.57484	1.36931	0.0168469	0.887851	up
ENSMUSG00000038607	Gng10	399	255	330	359	360	734	761	476	529	327	8.45633	5.06792	7.37039	8.20994	7.76218	15.5432	17.2109	10.528	11.522	7.27865	0.0127108	0.641237	up
ENSMUSG00000038608	Dock10	192	104	119	124	54	200	287	104	219	192	0.77426	0.412163	0.44009	0.510932	0.190017	0.739906	1.07809	0.377645	0.970078	0.819605	0.0173759	0.694684	up
ENSMUSG00000011305	Plin5	1798	2417	1046	1335	1226	835	976	671	2073	1060	22.8851	28.9006	14.0253	18.3294	15.8839	10.5999	13.2399	8.90739	27.0982	14.1671	0.0359224	-0.592798	down
ENSMUSG00000025888	Casp1	101	41	46	58	72	108	175	101	147	68	1.666	0.633307	0.786783	1.01985	1.19906	1.77597	3.11296	1.74022	2.49083	1.16752	0.0152251	0.823997	up
ENSMUSG00000029471	Camkk2	50	107	154	107	93	207	244	121	359	138	0.543054	0.563723	0.894074	0.596118	0.586735	1.07034	1.34895	0.651585	2.81502	0.822857	0.00856108	0.927751	up
ENSMUSG00000075273	Ttc30b	235	161	188	161	106	277	252	261	431	224	2.16735	1.39529	1.82683	1.59988	0.993488	2.55643	2.47409	2.50943	4.07997	2.16575	0.00116472	0.692593	up
ENSMUSG00000046056	Sbsn	87	35	47	40	41	121	110	59	125	78	1.06519	0.731882	0.850645	0.931488	1.19945	2.13285	3.15382	1.53559	1.83108	1.44931	0.00314379	0.896883	up
ENSMUSG00000025574	Tk1	85	68	99	94	56	215	384	131	81	177	1.48932	1.10895	1.82476	1.7654	0.985582	3.76962	7.18391	2.39338	1.45676	3.25529	0.00114947	1.22848	up
ENSMUSG00000035828	Pim3	4928	4051	3103	4388	4039	2566	2342	2181	4090	2664	51.3677	39.6362	34.0703	49.3352	42.8465	26.7069	26.0215	23.714	43.7566	29.1651	0.000100957	-0.673442	down
ENSMUSG00000035824	Tk2	492	331	272	358	270	540	727	277	926	447	5.23149	3.26159	3.08509	4.04931	3.22911	5.84558	8.39809	3.03358	10.2091	4.97117	0.0118964	0.657866	up
ENSMUSG00000024232	Bambi	85	71	137	89	68	119	132	186	147	200	0.422869	0.330289	0.714439	0.473337	0.341414	0.591208	0.69813	0.96477	0.751655	1.04741	0.00782686	0.728094	up
ENSMUSG00000036502	Tmem255a	42	32	8	37	34	50	38	53	73	99	0.311962	0.2225	0.112652	0.296607	0.252098	0.370203	0.29641	0.411196	0.558654	0.772816	0.0301982	0.93142	up
ENSMUSG00000030220	Arhgdib	669	568	517	595	388	980	3231	382	689	837	14.4205	11.7428	12.2745	14.4881	8.62392	20.9383	74.9716	8.6241	15.7815	19.1782	0.0130175	1.07802	up
ENSMUSG00000030223	Ptpro	68	39	21	55	77	136	221	72	59	74	0.33561	0.180603	0.10853	0.533613	0.387603	1.23777	1.16548	0.369915	0.300315	0.38368	0.0326324	1.00142	up
ENSMUSG00000030222	Rerg	173	173	183	199	48	102	57	70	107	130	1.93082	1.8076	2.14682	2.38921	0.54251	1.13822	0.678914	0.813227	1.22181	1.52503	0.0169415	-0.796293	down
ENSMUSG00000069601	Ank3	2259	3347	2277	1736	1698	1446	951	1520	1472	2608	8.96005	12.7436	7.25719	5.97228	5.36734	4.27646	3.07669	5.41463	5.02027	9.16516	0.0266808	-0.585645	down
ENSMUSG00000022360	Atad2	79	65	48	40	34	60	216	67	99	95	0.351491	0.271194	0.2248	0.190783	0.149941	0.265984	1.02419	0.307103	0.451569	0.44282	0.0132866	0.943323	up
ENSMUSG00000044167	Foxo1	1861	1651	977	1863	1605	980	827	747	1522	942	5.43234	4.52429	3.00453	5.86542	4.7691	2.85605	2.57183	2.27377	4.56048	2.88844	0.000325887	-0.775491	down
ENSMUSG00000027075	Slc43a1	3529	5388	2283	4035	5543	2402	2136	1945	2965	2537	29.5002	42.2199	20.122	36.9553	47.5621	19.9075	19.3149	16.7019	25.9655	22.442	0.000381785	-0.928683	down
ENSMUSG00000027078	Ube2l6	278	235	308	258	164	354	931	272	408	308	4.49571	3.5725	5.25966	4.50461	2.69651	5.71959	16.0909	4.58872	6.78104	5.23146	0.0133486	0.791969	up
ENSMUSG00000026308	Klhl30	2708	3772	2457	2260	2937	1518	1311	1930	1245	2076	22.1776	28.9974	21.1889	19.9616	24.4764	12.4087	11.441	16.4875	10.4594	17.8554	0.000179294	-0.891361	down
ENSMUSG00000002297	Dbf4	40	34	36	40	17	70	149	34	44	64	0.43897	0.326936	0.391202	0.444795	0.177943	0.720051	1.66194	0.362928	0.468556	0.698433	0.0129968	1.04451	up
ENSMUSG00000056413	Adap1	100	26	31	62	27	102	233	28	295	45	0.979769	0.235168	0.322917	0.653788	0.268592	1.00651	2.45734	0.284295	2.99373	0.462523	0.0136481	1.42715	up
ENSMUSG00000023034	Nr4a1	7122	3838	15063	7700	2689	5090	3622	4690	3340	5921	72.7755	36.5649	162.168	84.8403	27.8112	50.3634	39.436	48.476	34.6511	61.627	0.0466845	-0.731253	down
ENSMUSG00000017499	Cdc6	45	29	24	39	12	75	91	34	69	54	0.236812	0.141182	0.132335	0.216882	0.062985	0.390461	0.507921	0.181755	0.370148	0.295464	0.00352751	1.05478	up
ENSMUSG00000032220	Myo1e	674	818	643	473	514	259	374	462	359	618	3.68349	4.1966	3.6438	2.74178	2.81456	1.38858	2.14096	2.5943	1.98176	3.54509	0.0080046	-0.668095	down
ENSMUSG00000040254	Sema3d	74	51	33	49	10	63	141	52	78	78	0.293556	0.189857	0.13896	0.210796	0.039219	0.250686	0.599935	0.217353	0.317506	0.325347	0.0354929	0.889682	up
ENSMUSG00000036040	Adamtsl2	56	92	41	114	46	52	66	23	34	29	0.390043	0.598591	0.296255	0.86128	0.322398	0.358922	0.489781	0.161318	0.23917	0.213201	0.0325405	-0.855571	down
ENSMUSG00000018983	E2f2	37	37	56	27	21	35	342	77	42	69	0.196492	0.185088	0.314277	0.154036	0.111852	0.182543	1.94407	0.424696	0.226276	0.386043	0.00685696	1.60459	up
ENSMUSG00000001663	Gstt1	720	418	419	574	458	1291	1052	610	1396	754	17.6158	9.58315	10.8198	15.0688	11.3848	32.0041	27.5715	15.7318	34.9501	19.4046	8.55332e-05	0.882473	up
ENSMUSG00000001665	Gstt3	301	229	226	344	120	406	350	304	607	404	4.17321	2.93095	3.29797	5.13379	1.64524	5.54724	5.01901	4.36626	8.62287	5.84112	0.00268686	0.691011	up
ENSMUSG00000021319	Sfrp4	46	38	36	30	14	231	171	114	79	107	0.524303	0.322662	0.529166	0.351965	0.194522	3.19798	2.58174	1.64952	1.04365	1.18323	2.61316e-08	2.05782	up
ENSMUSG00000029167	Ppargc1a	749	560	1764	550	402	467	369	449	584	617	2.95253	2.05639	7.29038	2.42092	1.60015	1.82233	1.53847	1.83259	2.36543	2.5412	0.0245745	-0.77453	down
ENSMUSG00000022464	Slc38a4	4805	5923	5360	3561	5173	2500	1681	3723	1964	2681	30.9188	35.7788	36.328	24.712	33.868	16.063	11.5456	24.9776	12.9666	18.1171	0.000126013	-1.05306	down
ENSMUSG00000028341	Nr4a3	197	102	2429	183	598	28	40	16	129	32	0.868153	0.421171	11.3132	0.869437	2.68819	0.121378	0.186248	0.071141	0.585137	0.146863	9.58931e-06	-4.03571	down
ENSMUSG00000049866	Arl4c	47	18	22	16	16	45	156	34	63	52	0.29588	0.105287	0.145394	0.109251	0.099291	0.279555	1.05048	0.220429	0.403203	0.340699	0.00186304	1.49207	up
ENSMUSG00000032020	Ubash3b	34	24	41	17	2	39	157	39	38	47	0.199998	0.159502	0.168661	0.071273	0.008078	0.153535	0.6631	0.160867	0.154105	0.194355	0.0231197	1.4104	up
ENSMUSG00000072620	Slfn2	108	87	107	108	52	199	515	78	136	119	1.63898	1.23721	1.71365	1.76262	0.799369	3.01833	8.33807	1.23151	2.11815	1.89907	0.0126401	1.10783	up
ENSMUSG00000015396	Cd83	52	28	29	76	17	109	183	18	92	69	0.527157	0.267628	0.308635	0.827323	0.167774	1.10206	1.99185	0.190206	0.959061	0.739722	0.0280969	1.14828	up
ENSMUSG00000015134	Aldh1a3	88	64	95	66	15	294	239	75	100	138	0.658831	0.440721	0.744432	0.55537	0.111578	2.37827	2.00169	0.56928	0.806032	1.10354	0.00353	1.32276	up
ENSMUSG00000021904	Sema3g	921	1076	996	834	282	302	198	410	881	765	5.13	5.62703	5.84618	5.00826	1.59378	1.67898	1.173	2.37935	5.03746	4.47566	0.0467367	-0.76388	down
ENSMUSG00000002504	Slc9a3r2	2934	2316	4267	3223	1680	2048	1674	1390	2489	2261	35.8922	28.6106	60.1338	44.2633	22.3419	26.2543	24.4246	17.97	33.1313	30.6204	0.00263088	-0.635358	down
ENSMUSG00000038526	Car14	1467	2422	1328	1322	1148	911	913	1045	781	1240	22.231	35.0026	21.4233	21.9945	17.8876	13.7753	14.9746	16.5817	12.3266	20.1771	0.00148311	-0.723076	down
ENSMUSG00000042082	Arsb	519	239	215	362	200	416	770	223	1091	372	3.24623	1.40094	1.41639	2.44454	1.27066	2.6017	5.13812	1.45684	7.01335	2.44741	0.0261637	0.809091	up
ENSMUSG00000049580	Tsku	59	76	56	84	48	102	129	49	203	108	0.533488	0.649426	0.531899	0.821271	0.444498	0.932483	1.254	0.462708	2.13462	1.12952	0.0184623	0.751603	up
ENSMUSG00000027996	Sfrp2	39	6	40	28	56	226	161	127	93	106	0.490298	0.062682	0.528558	0.377249	0.719783	2.84973	2.1554	1.67006	1.20374	1.40166	6.45261e-05	1.95596	up
ENSMUSG00000027994	Mcub	38	68	40	35	48	136	101	52	73	74	0.73631	1.21079	0.799355	0.744829	0.928861	2.59755	2.19575	1.03936	1.4301	1.51662	0.0164101	0.818911	up
ENSMUSG00000035697	Arhgap45	99	85	78	66	79	149	426	63	156	126	0.628756	0.507022	0.524758	0.454962	0.511572	0.948352	2.90569	0.415493	1.02127	0.840196	0.0103729	1.06799	up
ENSMUSG00000056498	Tmem154	46	40	23	55	10	66	178	31	47	53	0.344885	0.278422	0.181598	0.443927	0.072627	0.49542	1.43025	0.24447	0.35785	0.416696	0.0425939	1.06294	up
ENSMUSG00000025432	Avil	182	109	299	249	111	110	74	98	214	138	1.51403	0.848951	2.62168	2.2702	0.973874	0.915079	0.65116	0.849195	1.90702	1.2231	0.0452578	-0.679007	down
ENSMUSG00000057722	Lepr	199	215	146	180	92	254	529	244	215	430	0.901977	0.920478	0.701553	0.883181	0.425946	1.15575	2.57475	1.15748	1.00847	2.06618	0.00117743	0.944738	up
ENSMUSG00000037885	Stk35	350	255	340	184	203	379	384	306	530	532	1.666	1.29891	1.81101	0.971423	1.07467	1.8442	2.10129	1.60255	2.65529	2.71095	0.00434253	0.584989	up
ENSMUSG00000020848	Doc2b	287	333	66	155	313	103	82	65	156	156	1.65979	1.81105	0.397575	0.969276	1.84309	0.593242	0.504737	0.387602	0.923217	0.944605	0.00444309	-1.18208	down
ENSMUSG00000030148	Clec4a2	70	43	57	49	84	165	538	48	93	79	0.774689	0.417872	0.606751	0.579748	0.863807	1.96672	7.79954	0.572035	0.977014	0.92402	0.00903343	1.47689	up
ENSMUSG00000073421	H2-Ab1	767	364	570	660	582	2236	1090	394	1171	751	16.0022	7.11974	12.5266	14.8606	12.3916	46.5947	24.2696	8.55755	25.0845	16.4613	0.0212101	0.829823	up
ENSMUSG00000046318	Ccbe1	107	93	114	89	57	287	167	229	149	274	0.411131	0.333035	0.458678	0.368547	0.222639	1.1016	0.682991	0.917126	0.585304	1.10516	4.5182e-06	1.20961	up
ENSMUSG00000030806	Stx1b	118	46	49	92	60	106	207	61	361	69	0.711786	0.237615	0.282281	0.551259	0.340805	0.585133	1.22007	0.351664	2.10029	0.396693	0.0262462	1.02378	up
ENSMUSG00000040435	Ppp1r15a	5131	8618	3832	4036	3488	2598	1613	2294	1794	3890	55.5909	87.5227	43.4384	47.1643	38.4313	28.0415	18.2473	25.8525	19.8634	44.2624	0.000121768	-1.1156	down
ENSMUSG00000022754	Tmem45a	60	44	54	81	35	116	140	79	57	74	0.555259	0.386584	0.528126	0.816509	0.327039	1.08493	1.39712	0.76475	0.547828	0.749017	0.0319634	0.708775	up
ENSMUSG00000074476	Spc24	48	48	48	50	38	71	98	53	65	106	0.817888	0.734312	0.886182	0.950252	0.726365	1.28627	1.86761	1.00767	1.21447	2.01325	0.0091899	0.668173	up
ENSMUSG00000031669	Gins3	37	49	48	28	19	67	93	22	89	63	0.364887	0.455138	0.492585	0.29441	0.187464	0.661884	0.987957	0.222096	0.911135	0.653149	0.0450509	0.781127	up
ENSMUSG00000032507	Fbxl2	29	110	100	80	118	20	50	20	36	31	0.202849	0.760454	0.76164	0.624454	0.88175	0.1441	0.382005	0.150049	0.269707	0.237679	0.000257026	-1.63302	down
ENSMUSG00000000049	Apoh	41	76	148	59	155	63	73	50	21	42	0.865382	1.50557	3.31068	1.33021	3.43073	1.32609	1.62784	1.2351	0.439645	1.03982	0.0286269	-1.0818	down
ENSMUSG00000047669	Msl3l2	47	43	83	31	26	60	107	73	88	68	0.551449	0.469061	1.02223	0.393824	0.306732	0.706552	1.34315	0.888198	1.06042	0.839241	0.0391797	0.709922	up
ENSMUSG00000022180	Slc7a8	583	521	462	515	1129	375	327	412	471	460	3.61087	3.02608	3.00994	3.44019	7.11168	2.31543	2.15307	2.65605	2.99349	2.98787	0.0103173	-0.802793	down
ENSMUSG00000031461	Myom2	15891	22440	16111	14070	15331	10473	7484	13317	8316	18668	79.2255	105.01	84.5967	75.6649	77.7778	52.1334	39.7711	69.2444	42.5475	97.7457	0.0235077	-0.606753	down
ENSMUSG00000019773	Fbxo5	67	50	37	29	28	56	217	34	90	56	0.866105	0.607436	0.504146	0.407976	0.360209	0.724087	3.00587	0.451523	1.19134	0.756917	0.0318854	1.02303	up
ENSMUSG00000022094	Slc39a14	690	1136	457	573	1128	308	301	280	505	403	3.57153	5.59155	2.51632	3.23677	6.03181	1.57337	1.64459	1.49915	2.65789	2.16484	2.44617e-05	-1.29702	down
ENSMUSG00000022096	Hr	1875	1972	1833	1429	1425	851	359	1360	793	1697	8.84655	8.76767	9.00695	7.23556	6.88321	3.83023	1.72269	6.79705	3.89664	8.28445	0.0162786	-0.818795	down
ENSMUSG00000022540	Rogdi	172	123	83	125	125	202	272	99	285	171	3.20496	2.13398	1.54945	2.52682	2.36457	3.79172	5.41619	1.81532	5.43932	3.32877	0.0313242	0.600922	up
ENSMUSG00000037921	Ddx60	89	44	47	37	30	77	105	41	127	78	0.342966	0.159514	0.189762	0.150347	0.114629	0.294699	0.429575	0.161796	0.503461	0.316435	0.0344563	0.711873	up
ENSMUSG00000024659	Anxa1	1826	1431	1147	1398	961	3167	5301	1332	1905	1677	27.588	20.2936	18.2567	22.7827	14.7749	47.7961	85.406	21.0077	29.5391	26.6049	0.0051241	0.912729	up
ENSMUSG00000026655	Fam107b	257	193	144	248	131	287	976	163	823	218	2.05294	1.26995	1.06002	1.87737	1.06212	2.01161	7.30361	1.3615	6.76611	1.82884	0.00399479	1.24077	up
ENSMUSG00000036339	Tmem260	132	78	101	102	125	83	267	115	646	108	0.819956	0.459506	0.933026	0.743023	0.684774	0.589096	1.66521	0.622469	4.42659	0.735737	0.0345527	1.01851	up
ENSMUSG00000028967	Errfi1	2537	3667	1905	1934	3019	1678	1566	1522	1543	1689	21.1007	28.6109	16.688	17.3366	25.5321	13.9277	13.879	13.1912	13.1664	14.7477	0.000301786	-0.813975	down
ENSMUSG00000044734	Serpinb1a	92	109	132	91	81	256	829	157	112	190	1.21085	1.34635	1.82333	1.2937	1.0821	3.37129	11.6491	2.15596	1.5044	2.62155	0.00128906	1.52695	up
ENSMUSG00000047414	Flrt2	45	245	203	189	86	370	322	207	253	297	0.353066	0.844717	0.758384	0.726049	0.310883	1.3146	1.21962	0.774466	0.923144	1.10958	0.0346426	0.822477	up
ENSMUSG00000013155	Enkd1	34	30	34	42	20	62	69	34	53	41	0.620633	0.510448	0.65003	0.884623	0.3611	1.10074	1.34645	0.695439	1.04497	0.848458	0.0427306	0.615583	up
ENSMUSG00000002265	Peg3	1949	1345	763	1178	924	500	1177	308	1211	528	5.48591	3.55455	2.26066	3.57631	2.64528	1.40572	3.52988	0.904258	3.49747	1.56066	0.0146715	-0.823851	down
ENSMUSG00000002266	Zim1	316	253	142	217	129	90	42	112	110	125	1.0365	0.779553	0.490823	0.768164	0.430687	0.295354	0.144301	0.382641	0.36857	0.428639	0.000172884	-1.19028	down
NewGene_9134	NewGene_9134	1774	2195	1696	1260	1034	3042	2982	2080	2253	2407	26.4097	30.6691	26.5978	20.2363	15.668	45.2344	47.3251	32.3031	34.4327	37.645	0.00165293	0.611128	up

## Sheet: Model_vs_WP.DEG  DESeq2
Supplementary Table 2: Model_vs_WP.DEG DESeq2
#ID	Symbol	B4_Count	B3_Count	B2_Count	B1_Count	B5_Count	E5_Count	E4_Count	E3_Count	E2_Count	E1_Count	B4_FPKM	B3_FPKM	B2_FPKM	B1_FPKM	B5_FPKM	E5_FPKM	E4_FPKM	E3_FPKM	E2_FPKM	E1_FPKM	Pvalue	log2FC	regulated
ENSMUSG00000044288	Cnr1	188	41	19	69	45	11	14	2	34	35	0.818023	0.16438	0.085115	0.32285	0.195657	0.043602	0.058151	0.009237	0.152725	0.151944	0.00441978	-1.88817	down
ENSMUSG00000030889	Vwa3a	78	53	30	57	99	35	19	24	34	17	0.453355	0.293483	0.171501	0.424209	0.570784	0.190786	0.103724	0.144223	0.197957	0.093387	0.00315716	-1.28836	down
NewGene_10325	NewGene_10325	33	49	31	36	39	142	100	90	53	60	0.759689	1.06718	0.751732	0.87769	0.912445	3.29355	2.34152	2.3181	1.2688	1.42791	0.000591944	1.3088	up
NewGene_10320	NewGene_10320	148	267	164	60	448	169	40	65	33	183	3.83982	6.52735	4.50025	1.68531	12.9094	4.38141	1.05054	1.86239	0.873765	4.87373	0.0411905	-1.19345	down
ENSMUSG00000053916	Nanp	82	87	95	83	79	126	117	61	210	164	1.48553	1.47406	1.81214	1.6237	1.45678	2.28148	2.15777	1.23104	3.93182	3.04597	0.0147579	0.663327	up
ENSMUSG00000029368	Alb	188	4	2440	102	1802	10	9	0	35	27	2.33124	0.046704	31.9654	1.35736	22.8077	0.123154	0.112309	0	0.444014	0.334467	1.62518e-05	-5.99053	down
ENSMUSG00000047205	Dusp18	425	317	220	196	344	206	203	203	153	175	2.32025	1.62507	1.30568	1.149	1.91143	1.12528	1.14376	1.23697	0.86456	1.01102	0.0226748	-0.617802	down
ENSMUSG00000019932	Kera	58	45	59	68	99	142	114	41	313	107	0.635888	0.463592	0.684086	0.810067	1.10898	1.57603	1.28557	0.504912	3.59784	1.21643	0.0167685	1.04992	up
ENSMUSG00000054720	Lrrc8c	1364	1553	1273	1331	447	632	490	310	835	317	4.98481	5.28665	4.85997	5.24563	1.64885	2.29315	1.80458	1.25277	3.13721	1.17625	0.000110617	-1.15462	down
ENSMUSG00000031910	Has3	75	47	120	68	8	109	155	126	273	92	0.320759	0.187652	0.539815	0.310653	0.030893	0.466332	0.670971	0.614328	1.23295	0.402387	0.00730633	1.31356	up
ENSMUSG00000046186	Cd109	51	60	58	47	16	125	49	25	215	108	0.216667	0.241921	0.259311	0.215232	0.067402	0.536866	0.212326	0.116483	0.959666	0.475058	0.0162341	1.17251	up
ENSMUSG00000023828	Slc22a3	467	49	57	283	137	128	29	22	106	79	3.3663	0.280168	0.429964	2.19859	0.866046	0.923131	0.17686	0.144648	0.791526	0.491427	0.0183456	-1.38943	down
NewGene_2038	NewGene_2038	295	467	110	277	304	116	143	88	134	89	2.0096	2.97732	0.737687	1.96855	1.91962	0.621158	1.45849	0.536072	1.026	0.477305	8.3858e-05	-1.32067	down
ENSMUSG00000051726	Kcnf1	93	327	108	214	153	49	50	43	63	232	0.486639	1.62039	0.599993	1.21889	0.817231	0.253882	0.267473	0.249619	0.34447	1.25593	0.0361901	-1.04265	down
ENSMUSG00000003617	Cp	1500	823	623	910	685	447	403	245	808	435	9.36718	4.71002	4.04743	6.016	4.45249	2.76213	2.50966	1.6351	5.16997	4.07318	0.000289375	-0.931053	down
NewGene_2770	NewGene_2770	74	36	48	76	56	27	55	17	33	14	0.631568	0.283361	0.426801	0.703752	0.642637	0.224106	0.473728	0.160534	0.28844	0.116258	0.0268716	-0.951406	down
ENSMUSG00000022018	Rgcc	6914	9861	3575	4405	9663	4529	3325	3000	4779	6279	190.55	255.09	103.77	130.952	271.016	124.911	93.1485	92.2534	136.456	177.463	0.0302661	-0.664654	down
ENSMUSG00000057614	Gnai1	1992	177	220	836	724	320	207	111	454	307	16.0711	1.33328	1.86358	7.26935	5.93968	2.58089	1.69076	0.99075	3.7915	2.53563	0.0194252	-1.45825	down
ENSMUSG00000052392	Acot4	137	43	13	43	184	60	14	7	37	0	0.556321	0.160981	0.053789	0.187961	0.759023	0.243957	0.053996	0.028914	0.153398	0	0.0334452	-1.88097	down
ENSMUSG00000035873	Pawr	209	132	109	130	70	112	59	50	108	52	3.02835	1.791	1.65701	2.03182	1.02461	1.61745	0.85789	0.808869	1.61504	0.766141	0.0276899	-0.704018	down
ENSMUSG00000000957	Mmp14	419	317	194	190	76	50	71	40	287	126	4.05706	2.89369	1.98593	1.99145	0.723063	0.482137	0.703372	0.398352	2.99884	1.23846	0.0287422	-1.04915	down
ENSMUSG00000022357	Klhl38	2260	4481	1619	2993	2959	1580	1271	1311	2079	1373	25.8493	48.1004	19.5017	36.9227	34.4422	18.0822	14.7742	16.729	24.6253	16.1041	0.000479006	-0.892718	down
ENSMUSG00000022358	Fbxo32	34892	76544	21244	29804	38681	22958	19722	17483	20556	35483	126.555	260.585	81.155	116.6	142.767	83.3229	72.7255	70.7439	77.2403	131.972	0.0122048	-0.767702	down
ENSMUSG00000008540	Mgst1	9430	1719	1255	3804	8595	2623	1198	973	2372	1947	222.834	35.4206	28.6468	90.7461	202.553	56.9138	26.3878	23.5122	56.748	43.2765	0.0106322	-1.45954	down
ENSMUSG00000058099	Nfam1	56	46	42	38	34	46	36	27	148	216	0.184989	0.141776	0.145658	0.135186	0.112045	0.150356	0.117987	0.099349	0.506702	0.732839	0.0298875	1.10523	up
ENSMUSG00000047497	Adamts12	544	217	178	234	198	96	132	61	208	45	1.60174	0.599958	0.552066	0.743168	0.593497	0.282187	0.394574	0.199758	0.63389	0.133254	0.000872002	-1.29589	down
NewGene_1956	NewGene_1956	78	56	108	72	29	70	142	144	130	199	0.814496	0.553253	1.25474	0.811735	0.301079	0.717489	1.55277	1.65586	1.52526	2.13199	0.00257457	1.07253	up
ENSMUSG00000057457	Phex	13	2	40	23	6	18	66	49	49	66	0.085846	0.012047	0.174221	0.172161	0.038082	0.124669	0.469472	0.281418	0.354084	0.477269	0.0127113	1.62336	up
NewGene_4971	NewGene_4971	126	182	196	129	194	321	290	202	158	249	1.99362	3.65215	3.72601	2.16253	3.86181	5.04092	5.50685	4.46376	2.92456	4.94058	0.0436379	0.590339	up
ENSMUSG00000000440	Pparg	2602	502	412	1543	1610	521	197	169	514	226	35.7577	5.89425	5.16021	21.2365	22.3332	6.94723	2.37694	2.38272	7.34618	2.75383	8.82142e-06	-2.01384	down
ENSMUSG00000019883	Echdc1	1727	509	556	801	1598	573	505	348	454	66	11.9311	3.36777	4.14102	6.06363	11.3233	4.3659	3.36338	2.74633	3.23465	0.572183	0.0209446	-1.38184	down
ENSMUSG00000024759	Atl3	1914	739	780	1077	913	791	665	329	1104	645	6.51492	2.36926	2.7966	3.9573	3.2329	2.65333	2.26611	1.23637	3.92498	2.21909	0.0330789	-0.589812	down
ENSMUSG00000027221	Chst1	1053	102	139	621	519	180	111	42	342	232	9.93677	0.901399	1.37783	6.32018	4.97958	1.69427	1.06022	0.442333	3.3432	2.24234	0.00955537	-1.43072	down
ENSMUSG00000055485	Soga1	166	118	81	101	60	29	71	42	79	69	0.532494	0.356195	0.273478	0.350361	0.194159	0.090537	0.229531	0.147322	0.260374	0.227501	0.0124679	-0.80395	down
ENSMUSG00000020928	Higd1b	143	157	189	180	92	134	81	61	130	39	5.01257	5.0518	6.84963	6.71942	3.21958	4.59518	2.81259	2.34132	4.66252	1.37391	0.0321225	-0.728004	down
ENSMUSG00000030022	Adamts9	617	344	494	452	161	157	127	88	199	32	1.94663	1.01855	1.63959	1.5366	0.514495	0.494577	0.404375	0.309226	0.648035	0.101734	2.10821e-05	-1.70317	down
ENSMUSG00000020492	Ska2	117	119	142	119	38	121	157	116	197	187	0.974185	0.930019	1.24254	1.06551	0.314483	1.00411	1.3262	1.07626	1.69914	1.58986	0.0375792	0.597214	up
ENSMUSG00000039081	Zfp503	574	272	443	453	313	1485	957	493	825	197	3.44398	1.53137	2.79948	2.93158	1.90758	8.91724	5.83842	3.29626	5.12496	1.20959	0.0112876	1.0138	up
ENSMUSG00000029816	Gpnmb	662	277	107	121	151	484	138	88	370	4015	4.5407	1.78415	0.766631	0.889509	1.0585	3.30504	0.954993	0.670564	2.62783	28.2235	0.0428223	1.98134	up
ENSMUSG00000003038	Hmgn2	1068	784	855	1123	921	1143	1295	1019	1130	2649	27.7763	14.7663	18.2401	24.2603	24.5746	22.9875	26.3403	22.751	23.4114	54.3268	0.0106698	0.63262	up
ENSMUSG00000017009	Sdc4	1183	985	739	925	1101	534	652	427	771	740	12.1739	9.51236	8.00509	10.2669	11.526	5.4999	6.82261	4.89618	8.2178	7.80395	0.000382357	-0.647604	down
ENSMUSG00000040037	Negr1	457	33	16	169	292	72	28	22	75	5	2.39844	0.15426	0.088947	0.933065	1.63719	0.363338	0.141626	0.169867	0.412329	0.023639	0.00317969	-2.24378	down
ENSMUSG00000054641	Mmrn1	82	137	55	90	50	105	122	71	227	168	0.458843	0.724853	0.321836	0.543243	0.286257	0.58994	0.700133	0.4463	1.32519	0.969651	0.0216453	0.757732	up
ENSMUSG00000037003	Tns2	3408	3033	2110	3049	2006	1446	1686	1218	2735	1375	18.6026	15.3461	12.0811	17.9422	10.9668	8.57774	9.22892	7.25614	15.4706	7.69023	0.000508914	-0.652143	down
ENSMUSG00000021957	Tkt	3308	727	648	1564	2797	1587	604	495	1265	724	25.968	5.36359	5.35446	13.2506	22.3428	12.4664	4.83003	4.33183	10.2934	5.82557	0.030687	-0.95122	down
ENSMUSG00000023087	Noct	933	627	961	1064	809	414	529	318	502	524	5.42372	4.07672	7.81718	8.98156	6.44391	1.06876	3.10166	2.75494	3.04479	1.38517	2.45781e-07	-0.914737	down
ENSMUSG00000031785	Adgrg1	2362	2144	1696	1922	1157	1324	647	587	1053	431	16.7298	14.237	12.6402	14.648	8.32734	9.26454	4.65611	4.63304	7.68028	3.09143	3.39833e-05	-1.13529	down
ENSMUSG00000042292	Mrtfa	258	231	492	363	144	285	553	390	751	295	1.73865	1.24846	3.10909	2.25438	0.842501	1.63774	3.23416	2.69816	5.09807	1.74096	0.0462003	0.65411	up
ENSMUSG00000044199	S1pr4	97	102	137	162	75	74	36	26	74	0	1.02008	1.00776	1.52221	1.84419	0.798847	0.782648	0.384328	0.303276	0.803966	0	0.0338848	-1.41211	down
NewGene_4409	NewGene_4409	496	262	441	653	258	602	848	546	391	741	3.75896	1.83043	2.72302	4.50172	2.75205	4.73151	4.88333	3.92929	2.76202	6.85614	0.0221905	0.650416	up
ENSMUSG00000054434	Tmem120b	1278	459	346	709	712	452	283	237	471	299	15.0713	5.19402	4.34566	8.96784	8.48764	5.28761	3.40069	3.10156	6.00942	3.57902	0.00174267	-0.965707	down
ENSMUSG00000026821	Ralgds	531	368	408	472	231	583	526	427	842	610	3.71827	2.44773	3.05224	3.51342	1.61032	4.13691	3.68817	3.38046	6.02402	4.29438	0.000573672	0.621417	up
ENSMUSG00000031373	Car5b	2968	273	114	1066	3987	699	154	80	344	205	21.8504	1.88642	0.882221	8.46709	29.8759	5.14437	1.15153	0.652774	2.62186	1.54599	0.00612575	-2.56225	down
ENSMUSG00000032058	Ppp2r1b	1840	321	278	739	1809	383	270	290	594	572	13.782	2.37785	2.23789	5.97034	13.8774	2.77323	2.20462	3.1106	4.53794	4.28487	0.00765077	-1.26815	down
ENSMUSG00000032942	Ucp3	13309	14735	8709	7495	12906	3452	4338	3293	4157	4916	137.559	142.981	94.8071	83.5573	135.74	35.6991	45.578	37.9636	44.5039	52.0945	5.18952e-12	-1.48162	down
NewGene_216	NewGene_216	183	183	188	77	37	90	49	52	76	33	1.72776	1.62267	1.86894	0.78574	0.354873	0.85272	0.469505	0.543369	0.742509	0.318824	0.0139845	-1.06338	down
ENSMUSG00000033096	Apmap	4447	1593	1252	2172	3949	1323	1046	689	1415	1019	50.3439	16.9172	14.9212	26.5146	45.4889	14.9816	12.0299	8.69933	16.5948	11.8251	0.000108573	-1.28609	down
ENSMUSG00000030546	Plin1	7132	281	384	4106	4372	1574	274	137	1431	337	72.1951	2.71229	3.78966	43.4292	43.7692	15.2805	2.59352	1.38321	14.2572	3.19654	0.0246765	-2.1216	down
ENSMUSG00000029279	Brdt	158	145	124	101	90	230	195	127	170	220	0.839767	0.723498	0.691187	0.577325	0.486746	1.22548	1.056	0.751241	0.93468	1.20159	0.0023328	0.659963	up
ENSMUSG00000046688	Tifa	100	58	104	72	66	163	83	52	149	243	1.09762	0.575946	1.07889	0.865083	0.747633	1.61116	0.881768	0.568285	1.71366	2.47074	0.0287921	0.795455	up
ENSMUSG00000004815	Dgkq	256	79	144	93	172	44	49	31	161	12	1.25451	0.350061	0.73212	0.492134	0.835188	0.205023	0.236549	0.16161	0.809236	0.053635	0.0118043	-1.35433	down
ENSMUSG00000032554	Trf	15111	2003	2113	8021	14618	1321	1617	889	5203	2501	148.707	18.4961	21.8925	94.19	146.391	13.008	16.1778	9.75487	53.0473	25.2351	0.00363918	-1.9329	down
ENSMUSG00000016637	Ift27	594	763	548	464	441	501	918	933	1199	740	14.8161	17.8863	14.4128	12.4978	11.1989	12.5207	23.2931	25.985	31.0044	18.9348	0.00476564	0.659205	up
ENSMUSG00000022579	Gpihbp1	3813	4108	2765	3366	2466	2769	1480	1584	2854	1395	109.528	109.787	84.4951	103.21	71.8932	79.1695	42.3456	51.0649	86.3437	40.1551	0.00250302	-0.66595	down
ENSMUSG00000020593	Lpin1	20056	19607	17061	15691	17033	8818	8964	8639	10654	13138	93.0289	85.5684	83.3477	78.5916	80.474	40.9941	42.2874	44.7546	51.3105	61.0752	7.45059e-09	-0.800159	down
ENSMUSG00000028036	Ptgfr	160	141	108	125	95	149	181	66	211	396	0.61895	0.520955	0.436148	0.570445	0.384407	0.569511	0.705555	0.278346	0.850261	1.5999	0.0497579	0.681769	up
ENSMUSG00000032392	Parp16	210	111	183	156	106	309	238	201	343	260	2.12232	1.0422	1.92155	1.70623	1.0986	3.1027	2.44014	2.24231	3.58003	2.68657	2.71054e-05	0.868205	up
ENSMUSG00000050064	Zfp697	85	42	36	44	40	27	22	15	39	19	0.415142	0.188852	0.184611	0.232113	0.19611	0.131018	0.104971	0.078142	0.194339	0.092815	0.00900581	-0.97625	down
ENSMUSG00000028957	Per3	615	395	557	569	255	947	1126	638	1210	831	2.59984	1.58	2.47174	2.58871	1.09496	3.9928	4.84671	3.00465	5.30892	3.60838	3.46358e-07	1.04737	up
ENSMUSG00000017692	Rhbdl3	162	117	216	153	136	187	307	317	409	151	1.09269	0.742771	1.5403	1.11119	0.931877	1.26641	2.10906	2.39503	2.86546	1.04784	0.004808	0.853356	up
ENSMUSG00000044768	Macir	637	417	968	594	293	675	1149	984	1048	887	1.54844	0.288518	3.07959	1.76703	0.233795	0.473045	6.71245	5.59439	3.16229	0.569968	0.00413441	0.779018	up
ENSMUSG00000067279	Ppp1r3c	4203	7155	5168	6148	10428	3222	3086	3127	2672	1644	39.0221	62.3499	50.5324	61.5717	98.5286	29.9321	29.1271	32.3862	25.6979	15.6438	7.60039e-05	-1.25485	down
ENSMUSG00000047446	Arl4a	3219	1925	1194	2014	2735	1618	1209	1080	1290	1821	29.023	18.0809	16.2699	22.4275	36.0141	19.9954	15.4291	16.8277	14.9511	13.7227	0.0141637	-0.631224	down
ENSMUSG00000057137	Tmem140	5221	8251	5547	6114	5102	3528	2715	2003	2988	4410	55.4347	78.8247	59.864	69.0668	52.8022	35.5201	27.3248	22.6436	31.4409	48.4111	3.83504e-06	-0.925685	down
ENSMUSG00000036452	Arhgap26	458	368	773	431	549	312	198	181	270	513	1.63456	1.1052	2.64025	1.48786	1.99037	0.99767	0.918488	0.672541	0.932283	1.68353	0.0079727	-0.807742	down
ENSMUSG00000021033	Gstz1	4842	1450	1213	2933	4020	2004	1177	1303	1867	1051	77.0357	20.7863	19.4961	48.8472	62.9946	30.622	18.2685	22.2014	29.7447	16.458	0.00877347	-0.935049	down
ENSMUSG00000029552	Tes	241	161	201	175	122	77	116	80	153	81	2.49269	1.41887	2.18993	1.77631	1.16405	0.719948	1.10584	0.8383	1.64318	0.77339	0.000773023	-0.782695	down
ENSMUSG00000019577	Pdk4	54216	107754	19287	35521	71783	15862	12456	9226	15348	21243	393.817	734.546	147.542	278.29	530.497	115.271	91.9687	74.748	115.472	158.187	8.15645e-08	-1.96492	down
NewGene_6386	NewGene_6386	57	45	45	27	15	56	65	38	60	90	0.513528	0.375452	0.420523	0.257629	0.137765	0.503492	0.597672	0.374509	0.560322	0.83171	0.0338228	0.77183	up
ENSMUSG00000090394	4930523C07Rik	607	315	292	389	303	241	145	112	352	187	2.72104	1.3627	1.37409	1.87956	1.38157	1.08534	0.662411	0.560854	1.64891	0.856115	0.00181388	-0.851747	down
ENSMUSG00000045180	Shroom2	112	127	78	107	65	42	61	34	91	39	0.3759	0.399725	0.274439	0.386111	0.222482	0.138862	0.206788	0.128001	0.317419	0.133158	0.00535016	-0.84226	down
ENSMUSG00000034957	Cebpa	5164	334	439	2227	3230	1401	242	136	1084	575	49.7541	3.01864	4.44648	23.1375	31.6614	13.5006	2.36814	1.46064	10.8115	6.69996	0.0380549	-1.73235	down
ENSMUSG00000027624	Epb41l1	1236	328	382	733	725	346	339	118	610	329	4.97414	1.34725	1.59222	3.21662	3.1306	1.34555	1.46425	0.457338	2.65865	1.02051	0.00954425	-0.967669	down
ENSMUSG00000037112	Sik2	1178	232	370	516	886	142	282	136	266	31	7.02231	1.26604	2.18371	3.35055	5.48461	0.877262	1.67208	0.866806	1.76757	0.148336	0.00020608	-1.86876	down
ENSMUSG00000002688	Prkd1	382	141	161	306	257	242	100	93	189	81	2.63937	0.913315	1.1679	2.28264	1.81081	1.67064	0.702852	0.712603	1.35313	0.57044	0.0324367	-0.782158	down
ENSMUSG00000031431	Tsc22d3	17041	21336	17723	15167	23995	10795	14409	8642	13128	10107	221.947	260.56	242.724	215.246	315.802	141.995	192.231	126.745	177.475	133.669	0.00044184	-0.735288	down
ENSMUSG00000037999	Arap2	222	140	188	174	73	94	67	38	120	64	0.768467	0.452421	0.682425	0.649979	0.25586	0.324609	0.234104	0.143376	0.429228	0.224397	0.00119012	-1.01067	down
ENSMUSG00000035849	Krt222	41	27	45	47	30	54	67	48	84	84	0.331489	0.205897	0.388873	0.415365	0.251112	0.443201	0.600238	0.433919	0.715533	0.70586	0.0024311	0.857294	up
ENSMUSG00000022807	Osbpl11	1614	940	755	959	1225	805	568	436	699	732	9.07376	4.95184	4.44684	5.82547	6.97473	4.50709	3.23186	2.72153	4.06463	4.1956	0.00104826	-0.733567	down
ENSMUSG00000041559	Fmod	968	985	1514	950	910	1570	1855	1177	5197	1548	7.84502	7.4958	12.9258	8.30545	7.50289	12.7339	15.2933	10.6444	43.6884	12.8704	0.000818698	1.06131	up
ENSMUSG00000048373	Fgfbp1	97	134	177	183	54	143	161	169	217	268	1.88057	2.20591	3.55228	3.00485	0.630757	2.83442	2.04053	3.54231	3.44111	3.16477	0.0428772	0.62493	up
ENSMUSG00000030428	Ttyh1	170	96	76	73	84	70	54	29	76	25	1.32526	0.628276	0.656546	0.569946	0.552002	0.403058	0.397682	0.184956	0.519863	0.144218	0.0118442	-0.9302	down
ENSMUSG00000034858	Fam214a	2904	2067	1345	1961	2333	1463	1225	790	1212	1229	17.7028	11.8605	8.30628	12.8651	14.326	8.82762	7.94796	5.41341	7.50494	7.58021	0.000138229	-0.811726	down
ENSMUSG00000035105	Egln3	1268	2306	1057	1039	2546	1111	1128	711	706	1096	12.0457	20.57	10.5721	10.65	24.6239	10.5578	10.8933	7.53417	6.94643	10.676	0.0142492	-0.796251	down
ENSMUSG00000001240	Ramp2	3313	1859	3169	1574	2548	1536	2000	932	1600	1091	64.5777	37.9968	65.3042	37.8513	50.3093	33.7263	39.7173	21.6489	35.9123	24.3426	0.00245807	-0.772011	down
ENSMUSG00000041598	Cdc42ep4	807	719	497	824	373	376	304	288	699	257	6.56156	5.49197	4.21738	7.28221	3.18827	2.7937	2.59416	2.68887	5.95807	1.95433	0.00751215	-0.700166	down
NewGene_1967	NewGene_1967	266	136	446	443	141	465	601	708	397	620	6.26985	2.98772	11.2899	11.3715	3.37591	11.0244	14.4888	18.7902	9.75149	15.1101	0.00253109	1.06226	up
ENSMUSG00000020709	Adap2	163	128	89	84	61	17	33	28	112	30	2.30046	1.69445	1.32552	1.28281	0.86635	0.237072	0.469726	0.427423	1.63416	0.435584	0.00570599	-1.24363	down
ENSMUSG00000073830	Mup14	403	74	91	33	847	37	24	8	156	56	13.7584	1.89847	2.59949	0.973221	23.5681	1.00392	0.661264	0.237962	5.51301	1.54891	0.00855717	-2.56616	down
ENSMUSG00000026708	Cenpl	49	33	27	45	17	48	45	35	78	62	0.595066	0.285134	0.183526	0.551457	0.216953	0.44027	0.382775	0.403934	0.772423	0.631008	0.0361267	0.697035	up
ENSMUSG00000040957	Cables1	314	126	108	176	208	90	109	38	134	34	2.3578	0.89149	0.857699	1.41331	1.57415	0.684025	0.821187	0.308896	1.04031	0.256099	0.00339214	-1.18768	down
NewGene_2688	NewGene_2688	220	110	144	210	215	269	212	220	211	634	10.3964	4.88157	7.17315	10.7117	10.357	12.7696	10.1981	11.6422	10.3631	30.4789	0.0221802	0.79718	up
ENSMUSG00000061132	Blnk	50	41	24	40	32	75	105	42	84	171	0.592881	0.453689	0.301445	0.533804	0.380963	0.904435	1.27754	0.558398	1.04394	2.1154	0.000172066	1.37433	up
ENSMUSG00000060429	Sntb1	660	137	241	362	258	168	94	168	307	147	3.39432	0.657382	1.30491	2.00686	1.34846	0.860318	0.489012	0.959425	1.63303	0.7752	0.023502	-0.845865	down
ENSMUSG00000048040	Arxes2	2548	104	46	1202	3447	638	139	14	176	221	42.0699	1.60431	0.783911	21.4093	57.9215	10.528	2.32614	0.252239	3.00633	3.73452	0.0177193	-2.68242	down
ENSMUSG00000028854	Slc9a1	883	1035	525	723	690	349	433	291	657	782	4.7758	5.25514	2.99206	4.21652	3.79763	1.88795	2.38157	1.75551	3.68241	4.33432	0.0144438	-0.61031	down
ENSMUSG00000028581	Laptm5	459	258	206	261	295	366	272	187	478	1351	4.45795	2.34789	2.10335	2.7339	2.91892	3.55781	2.69017	2.02729	4.81111	13.4766	0.044588	0.838967	up
ENSMUSG00000033022	Cdo1	9356	686	588	3357	6228	2623	422	210	1199	428	149.655	10.2054	9.82189	57.4876	101.092	41.7183	6.79535	3.7014	19.8194	6.95919	0.0232555	-2.03384	down
ENSMUSG00000024935	Slc1a1	392	387	294	396	142	190	139	102	137	95	2.60394	2.41644	2.05714	2.84248	0.961535	1.26016	0.937741	0.751846	0.941463	0.642462	1.56301e-05	-1.19765	down
ENSMUSG00000024939	Fam89b	179	165	75	179	271	571	252	107	251	631	3.78949	3.29542	1.63681	4.06872	5.81823	12.1134	5.46217	2.51278	5.53139	13.6418	0.0205772	1.0323	up
ENSMUSG00000015568	Lpl	53674	19370	9449	22031	40117	26028	10242	6892	13041	8680	330.213	111.799	61.2257	146.143	251.172	160.198	64.0582	47.2794	83.1021	54.7253	0.0422406	-1.12618	down
ENSMUSG00000025511	Tspan4	957	774	757	729	504	1082	872	765	1915	1110	16.8835	13.7407	15.4461	15.3858	8.95712	20.8596	16.9551	16.3456	37.7032	22.9199	0.000751504	0.654556	up
ENSMUSG00000020038	Cry1	582	548	611	664	466	899	892	676	1019	1046	4.86	4.29211	5.37253	5.98336	3.96132	7.51717	7.57635	6.29773	8.82405	8.96206	2.92635e-09	0.694158	up
ENSMUSG00000005057	Sh2b2	397	72	87	268	356	135	72	59	149	115	3.57019	0.601032	0.846544	2.60316	3.28068	1.21416	0.725282	0.595597	1.36752	1.04471	0.011972	-1.16202	down
ENSMUSG00000110439	Mup22	5735	833	117	105	710	83	46	27	708	57	168.535	22.9538	3.60169	3.30268	21.2281	2.43958	1.36269	0.88089	21.534	1.68811	0.00891764	-3.01805	down
ENSMUSG00000025491	Ifitm1	47	35	43	58	10	73	89	64	144	127	1.60202	1.05619	1.49439	2.14407	0.331983	2.4987	2.96145	2.31371	4.94749	3.83665	0.000148651	1.41768	up
ENSMUSG00000035963	Odf3l2	569	993	397	949	1130	360	199	280	228	644	11.5253	18.8896	8.47009	20.7465	23.2983	7.29518	4.0953	6.32827	4.77238	13.3693	0.000911333	-1.24024	down
ENSMUSG00000023992	Trem2	43	38	22	18	10	70	16	7	94	487	0.972907	0.817245	0.521824	0.426775	0.219143	1.62696	0.36018	0.16744	2.24983	11.6431	0.00292449	2.36834	up
ENSMUSG00000021559	Dapk1	435	234	127	266	178	132	90	39	150	117	2.04161	1.02246	0.625226	1.32979	0.84765	0.607569	0.421434	0.198582	0.713556	0.5514	0.000465866	-1.1946	down
ENSMUSG00000071657	Bscl2	2451	576	641	1474	2488	901	675	580	898	675	37.2331	7.35436	9.16022	23.084	35.1027	12.4202	9.23092	8.9421	13.848	9.835	0.00742937	-1.02916	down
ENSMUSG00000035226	Rims4	77	85	56	101	36	57	35	18	35	7	0.392436	0.40558	0.298291	0.550794	0.181894	0.287961	0.180762	0.100091	0.184121	0.032315	0.0188407	-1.15007	down
ENSMUSG00000024222	Fkbp5	4658	5814	2432	3655	5148	1762	1165	1832	1544	1423	33.2417	38.9485	18.2768	28.1325	37.3907	12.5766	8.4411	14.5769	11.3996	9.56517	5.65148e-08	-1.44246	down
ENSMUSG00000041729	Coro2b	402	366	289	316	260	196	163	121	326	222	3.14694	2.50147	2.39633	2.52257	2.42126	1.56212	1.3271	1.051	2.58475	1.8003	0.00155542	-0.649358	down
NewGene_1809	NewGene_1809	23	6	50	48	16	50	111	86	99	67	0.302668	0.072191	0.70312	0.700724	0.218762	0.666847	1.52498	1.29393	1.38366	0.928968	0.00151274	1.59156	up
ENSMUSG00000047180	Neurl3	72	64	95	81	69	76	113	101	180	400	0.714687	0.623738	1.02028	0.906499	0.69385	0.736001	1.1094	1.08079	1.97519	3.99258	0.00310958	1.18543	up
ENSMUSG00000050914	Ankrd37	66	80	107	89	70	174	125	98	139	127	1.7753	2.03906	3.06862	2.59748	1.94496	4.74388	3.47474	2.95679	3.91217	3.52945	0.00322869	0.720686	up
ENSMUSG00000029101	Rgs12	219	246	190	175	90	96	80	82	164	15	1.11783	1.24327	0.957277	0.892338	0.420415	0.440315	0.491877	0.435	0.934	0.070397	0.0237576	-1.01209	down
ENSMUSG00000020423	Btg2	1317	2673	1671	1205	1388	1114	749	473	912	505	12.1468	23.138	16.2289	11.9881	13.0208	10.2743	7.01691	4.86025	8.70822	4.77163	7.66712e-05	-1.11069	down
ENSMUSG00000020427	Igfbp3	2925	3438	2331	2782	1538	1481	956	804	2124	1467	30.598	33.7833	25.6824	31.3955	16.344	15.5058	10.1471	9.37585	23.0497	15.7213	4.46726e-05	-0.899855	down
NewGene_8374	NewGene_8374	147	118	75	87	139	190	185	179	143	273	2.44671	1.91308	1.4254	1.5318	2.96726	3.38048	3.44808	3.51973	2.62114	5.70631	0.00455929	0.814508	up
ENSMUSG00000027195	Hsd17b12	2185	473	487	1066	2426	694	358	222	571	436	29.0603	5.90175	6.81574	15.2834	32.839	9.23208	4.83945	3.28766	7.85865	5.93845	0.000493312	-1.56796	down
ENSMUSG00000070737	Tmem35b	102	42	61	93	115	24	55	29	68	65	2.30327	0.88253	0.908339	2.1735	2.62141	0.522667	0.79842	0.724222	1.59057	1.48742	0.0468396	-0.795109	down
ENSMUSG00000041025	Iffo2	185	176	170	180	45	94	72	61	133	86	0.818061	0.73053	0.78917	0.855897	0.202376	0.415525	0.323797	0.296387	0.606408	0.387593	0.0321375	-0.699034	down
NewGene_7300	NewGene_7300	114	127	78	135	74	44	34	49	55	68	1.66833	1.7404	1.19954	2.12649	1.10231	0.633477	0.505943	0.793833	0.830178	1.01487	0.000229717	-1.02344	down
ENSMUSG00000031489	Adrb3	975	18	36	742	1087	291	42	11	100	9	10.2272	0.146771	0.334352	7.82382	11.5809	2.64093	0.378096	0.109753	1.01382	0.078658	0.0248139	-2.67094	down
ENSMUSG00000039361	Picalm	9935	10618	9018	7935	9897	5375	4997	4201	6043	8678	62.151	69.0269	59.5244	55.6027	69.4881	37.1911	38.5969	34.6405	43.3867	72.2994	0.000195848	-0.680609	down
ENSMUSG00000031155	Pim2	61	68	81	85	40	85	103	75	82	164	0.745666	0.786446	1.04892	1.13382	0.491599	1.04167	1.2836	1.02335	1.04519	2.07628	0.0279796	0.651429	up
ENSMUSG00000070803	Cited4	238	194	330	215	129	223	431	374	530	316	4.80913	3.67866	7.02763	4.68155	2.65425	4.51305	8.86414	8.44324	11.1193	6.55487	0.00225928	0.815165	up
ENSMUSG00000042156	Dzip1	110	79	78	98	63	143	125	61	166	156	0.616789	0.417252	0.465303	0.59192	0.358649	0.80582	0.718374	0.384382	0.967877	0.900423	0.0112182	0.633136	up
NewGene_10034	NewGene_10034	182	199	150	156	74	287	234	322	288	202	1.72576	1.75768	1.41193	1.60001	0.835485	2.86068	2.31719	3.59137	3.01527	2.02163	0.00052536	0.904717	up
ENSMUSG00000028041	Adam15	1732	1339	1591	1418	739	1060	671	645	1214	765	15.0668	10.5006	13.9309	13.165	6.42547	8.83469	5.60661	6.27036	10.4717	6.15517	0.00373714	-0.591292	down
ENSMUSG00000029675	Eln	1027	1098	1173	809	275	274	294	213	555	219	6.74257	6.7657	8.11002	5.72739	1.83137	1.79929	1.96277	1.55701	3.77173	1.47259	6.37237e-06	-1.44526	down
ENSMUSG00000027544	Nfatc2	248	277	250	252	119	292	473	242	473	249	0.952582	1.11046	1.04801	1.11614	0.494648	1.26901	1.84315	1.05455	1.9052	0.945302	0.00937335	0.644403	up
ENSMUSG00000022040	Ephx2	4545	1289	655	1924	5560	1821	846	622	921	398	56.5066	15.0361	8.5656	25.7997	70.3374	22.6559	10.6928	8.62438	11.852	5.06427	0.0180623	-1.6048	down
ENSMUSG00000048707	Tprn	116	125	69	110	72	29	71	52	78	14	1.04665	1.05795	0.658066	1.07582	0.659887	0.258313	0.648953	0.526708	0.729799	0.127667	0.0253059	-0.951833	down
NewGene_6444	NewGene_6444	92	102	112	105	76	195	153	213	133	65	0.982198	0.854477	1.3635	1.17333	0.69131	1.87233	1.44491	3.35566	1.88188	0.702642	0.0350767	0.735025	up
ENSMUSG00000050164	Mchr1	34	34	46	44	10	46	71	122	201	60	0.385835	0.365258	0.559696	0.541189	0.10798	0.524897	0.833993	1.5624	2.39769	0.709201	0.000482256	1.63844	up
ENSMUSG00000026879	Gsn	107793	66305	40993	67672	49609	29592	40195	21268	89975	38110	1029.23	594.949	412.421	698.195	482.087	282.417	389.74	226.921	890.838	372.71	0.0451748	-0.591419	down
ENSMUSG00000074896	Ifit3	197	164	117	185	66	190	194	169	525	325	2.85527	2.22735	1.77771	2.88829	0.969642	2.75032	2.85194	2.73384	7.87172	4.82988	0.00198925	0.975281	up
ENSMUSG00000014361	Mertk	341	203	196	218	144	142	112	73	207	69	2.00215	1.11521	1.21131	1.38286	0.857414	0.834802	0.664112	0.475304	1.26068	0.412733	0.00519632	-0.826667	down
ENSMUSG00000002910	Arrdc2	9075	11711	4063	9315	7347	2410	1414	1510	1819	2221	97.4973	118.099	45.9749	107.947	80.322	25.9094	15.4376	18.0938	20.2368	24.4605	6.12014e-17	-2.09992	down
ENSMUSG00000027412	Lpin3	204	172	100	163	58	80	49	71	131	71	1.48231	1.18469	0.762451	1.31435	0.431277	0.578141	0.360692	0.569743	0.985611	0.526897	0.0290637	-0.723661	down
ENSMUSG00000054252	Fgfr3	202	201	354	218	77	121	62	42	112	118	1.20246	1.12686	2.25639	1.39923	0.463446	0.718649	0.378497	0.264534	0.732047	0.71773	0.00139573	-1.1701	down
ENSMUSG00000030598	Fbxo17	224	227	192	121	163	256	356	264	293	507	3.18553	3.05379	2.85779	1.85248	2.28939	3.71204	5.24571	4.26114	4.44673	7.66372	0.000265987	0.892103	up
ENSMUSG00000060961	Slc4a4	791	668	563	416	514	340	507	288	385	249	2.55032	2.0048	1.89076	1.42991	1.73575	1.0844	1.787	1.06648	1.40927	0.81161	0.00284682	-0.686631	down
ENSMUSG00000049672	Zbtb14	488	340	442	460	251	555	618	507	727	456	2.92616	1.85024	2.69717	2.98437	1.48173	3.47171	3.75815	3.27768	4.80276	2.71398	0.000790961	0.592655	up
ENSMUSG00000022231	Sema5a	429	279	199	326	145	194	151	65	253	138	1.00275	0.612595	0.488959	0.821114	0.344722	0.453107	0.357485	0.167547	0.611256	0.330313	0.017053	-0.739365	down
ENSMUSG00000079450	Cldn34c1	79	34	50	58	40	38	21	14	41	25	0.604129	0.238586	0.397667	0.473042	0.313461	0.287656	0.156623	0.115953	0.325367	0.193882	0.0190742	-0.872649	down
ENSMUSG00000032280	Tle3	485	254	240	356	201	41	199	109	333	109	2.8878	1.53161	1.28403	1.92872	1.08941	0.441187	1.0983	0.638511	2.19877	0.54265	0.0222737	-0.930892	down
ENSMUSG00000027656	Ccn5	190	117	104	141	51	157	138	121	300	365	2.78483	1.61311	1.60725	2.23058	0.751425	2.30797	2.05889	1.97787	4.57006	5.50156	0.00858375	0.887586	up
ENSMUSG00000002032	Tmem25	117	97	94	95	69	262	147	116	147	72	1.0958	0.85591	0.880282	1.02499	0.613383	2.36877	1.35222	1.1596	1.4464	0.651655	0.0277935	0.727006	up
ENSMUSG00000035834	Polr3g	100	63	83	95	33	120	130	87	106	133	0.834214	0.481183	0.718337	0.839122	0.348626	0.984991	1.09481	0.79919	0.897355	1.1262	0.0107526	0.697841	up
NewGene_4850	NewGene_4850	2590	490	2084	1263	2994	534	764	763	462	1649	34.886	6.18956	29.5616	18.3495	41.0463	7.19446	10.4639	11.46	6.44361	22.7705	0.0322937	-1.17191	down
ENSMUSG00000020546	Stxbp4	169	256	334	244	101	292	348	359	391	258	0.743914	1.07082	1.57695	1.10683	0.433481	1.23136	1.49571	1.76612	1.74368	1.11524	0.0225995	0.64956	up
ENSMUSG00000028776	Tinagl1	2682	2452	3042	2771	1719	1349	1207	987	2188	594	34.7383	29.8636	41.5385	38.7589	22.6953	17.4899	15.87	14.267	29.4719	7.88556	0.000223714	-0.966316	down
ENSMUSG00000021792	Prxl2a	4333	1169	1079	2603	4403	2107	1016	1081	1296	1039	71.988	17.9618	18.4533	46.4191	74.2088	34.4071	16.8681	19.8359	22.1869	17.4511	0.00935487	-1.0349	down
ENSMUSG00000053063	Clec12a	49	24	6	36	37	53	19	6	71	470	0.493574	0.221315	0.07289	0.390221	0.374662	0.532094	0.195284	0.052126	0.734703	4.86843	0.0175257	1.98194	up
ENSMUSG00000037977	6430571L13Rik	730	510	1254	1238	417	1116	1680	1636	1696	882	7.10464	4.65248	12.8546	12.9927	4.12284	10.8626	16.6246	17.7616	17.1017	8.79804	0.00781826	0.837945	up
ENSMUSG00000078607	1810010H24Rik	67	28	21	59	28	86	67	49	56	109	1.00234	0.390766	0.324818	1.09816	0.653223	1.29199	1.01284	0.809123	0.850314	1.68611	0.0163198	0.923684	up
ENSMUSG00000056749	Nfil3	531	786	870	758	802	443	545	378	455	580	6.61999	9.21054	11.4359	10.2089	10.1861	5.53613	6.90755	5.25985	5.88442	7.42379	0.00261041	-0.626892	down
ENSMUSG00000050592	Fam78a	195	146	343	255	70	306	466	483	695	272	1.24263	0.889546	2.27137	1.75008	0.456593	1.98618	2.98332	3.38043	4.50825	1.99955	0.00079514	1.21116	up
ENSMUSG00000033308	Dpyd	616	170	126	303	577	193	144	100	202	203	3.46011	0.89769	0.743722	1.83985	3.30389	1.08485	0.820807	0.622323	1.16774	1.16881	0.00812119	-1.09746	down
ENSMUSG00000101389	Ms4a4a	117	83	47	54	81	27	8	8	47	81	3.52805	2.35263	1.47535	1.73662	2.49268	0.817661	0.240838	0.254974	1.47307	2.49328	0.0357015	-1.1869	down
ENSMUSG00000048756	Foxo3	1354	1650	1099	1451	948	615	753	516	986	788	5.09375	5.80114	4.27686	5.77682	3.61833	2.29122	2.82546	2.14778	3.79138	2.98292	4.12965e-07	-0.797434	down
ENSMUSG00000031217	Efnb1	440	325	254	365	211	249	151	122	335	122	3.41128	2.36261	2.07172	3.05204	1.66259	1.9351	1.18928	1.05276	2.69097	0.965692	0.0178093	-0.664394	down
ENSMUSG00000020738	Sumo2	3165	1734	2498	1984	1919	2552	4600	2284	1582	7273	76.2076	39.1479	63.4246	51.5735	47.108	61.5049	112.591	68.6887	39.5284	179.53	0.0288824	0.739429	up
ENSMUSG00000033849	B3galt2	3968	172	203	1215	1971	495	152	57	516	226	10.8086	0.439592	0.581656	3.56749	5.46396	1.34707	0.419922	0.172899	1.45518	0.630718	0.00620107	-2.3757	down
NewGene_138	NewGene_138	56	46	67	50	54	49	113	56	76	141	1.33664	0.942504	1.67408	1.11865	1.22149	1.02523	2.46419	1.27358	1.67119	3.41753	0.0419861	0.688504	up
ENSMUSG00000058624	Gda	1349	919	971	939	618	606	487	343	860	474	6.28773	4.01974	4.76579	4.72126	2.92983	2.82417	2.30775	1.77903	4.15029	2.26118	0.000180749	-0.752268	down
ENSMUSG00000040794	C1qtnf4	141	104	166	245	307	260	347	384	218	349	2.74913	1.91146	3.41969	5.18142	6.11635	5.09452	6.90611	8.38701	4.42721	7.01121	0.0471052	0.715224	up
ENSMUSG00000031029	Eif3f	6338	6303	6631	7445	10144	11409	10462	9471	7051	16564	63.7835	59.5382	70.288	80.8133	103.888	114.898	107.049	106.347	73.5189	170.945	0.0273619	0.587513	up
ENSMUSG00000028862	Map3k6	942	751	608	685	599	229	125	186	300	204	5.49453	4.11309	3.73827	4.31048	3.55369	1.33633	0.738418	1.20739	1.81201	1.218	1.70045e-17	-1.73734	down
ENSMUSG00000042797	Aqp11	80	43	52	64	55	32	37	12	55	6	0.536831	0.272295	0.389014	0.465167	0.37707	0.213153	0.249975	0.090447	0.381632	0.084007	0.0366612	-1.0409	down
ENSMUSG00000040557	Mettl27	186	156	100	115	91	58	93	62	119	79	3.07228	2.0837	0.96817	1.78645	1.21341	0.65694	0.882854	0.657047	1.19885	0.720725	0.0166225	-0.611468	down
ENSMUSG00000026525	Opn3	228	29	48	124	246	42	28	24	85	18	3.00746	0.35287	0.668082	1.7624	3.30341	0.553809	0.368818	0.346263	1.15353	0.233281	0.00201106	-1.82149	down
ENSMUSG00000045534	Kcna5	988	952	783	1007	461	606	353	285	667	188	8.72992	7.89203	7.28709	9.60074	4.14001	5.35268	3.16439	2.80653	6.10159	1.6991	0.00184806	-0.94426	down
NewGene_2754	NewGene_2754	137	122	188	301	280	341	393	439	200	390	1.60373	1.48594	2.41939	3.92596	3.94206	4.53062	5.01602	6.37033	2.4177	5.34822	0.0217074	0.820351	up
ENSMUSG00000021719	Rgs7bp	180	75	68	119	57	52	36	46	96	33	0.641121	0.251305	0.253907	0.455371	0.20731	0.185016	0.129915	0.181841	0.352049	0.11842	0.0229493	-0.857109	down
ENSMUSG00000036395	Glb1l2	1986	203	275	909	605	228	185	102	694	239	13.7024	1.30508	1.98117	7.34811	4.21912	1.55771	1.3014	0.775975	4.92851	1.67361	0.0257183	-1.4407	down
ENSMUSG00000032898	Fbxo21	2936	834	790	1545	2217	1208	751	624	1074	693	18.9539	5.07003	5.36483	10.7357	14.6656	7.74411	4.88065	4.49918	7.18684	4.53712	0.00842577	-0.909112	down
ENSMUSG00000033767	Tmem131l	326	291	230	164	207	137	118	120	229	113	1.526	1.28404	1.10782	0.809516	0.968571	0.621099	0.566066	0.613302	1.07749	0.525212	0.00291252	-0.730833	down
ENSMUSG00000072214	Septin5	187	147	149	158	185	49	109	54	161	117	1.28987	0.957846	1.12801	1.17222	1.28887	0.331138	0.757307	0.40909	1.14419	0.820167	0.0112536	-0.768206	down
ENSMUSG00000037440	Vnn1	227	27	24	123	102	47	4	0	74	19	2.37063	0.256036	0.261864	1.38528	1.08279	0.489762	0.042591	0	0.793911	0.195455	0.0350346	-1.82839	down
ENSMUSG00000062563	Cys1	139	140	215	157	108	432	323	156	431	252	2.01641	1.98615	3.28898	2.42894	1.67754	6.38752	4.86847	2.51469	6.77498	3.75073	6.30667e-05	1.09209	up
ENSMUSG00000030495	Slc7a10	1150	61	97	546	663	18	47	21	284	167	15.3688	0.73431	1.31821	7.68347	8.94139	0.221193	0.613108	0.29508	3.96772	2.21567	0.0131517	-2.29639	down
ENSMUSG00000031725	Ces1f	1850	114	53	710	1099	363	55	39	261	54	24.2912	1.40143	0.72062	10.0572	14.6901	4.7693	0.734616	0.567913	3.58208	0.719737	0.0163155	-2.29866	down
ENSMUSG00000038007	Acer2	816	537	167	453	597	455	207	150	343	250	4.91204	3.02315	1.05035	2.93106	3.64275	2.72973	1.26043	1.00401	2.12791	1.53613	0.0222883	-0.847155	down
ENSMUSG00000050666	Vstm4	205	136	134	178	83	89	91	64	161	40	1.88386	1.16977	1.29957	1.76009	0.7701	0.819264	0.846189	0.657832	1.53541	0.371406	0.0425365	-0.676278	down
ENSMUSG00000002289	Angptl4	2882	748	517	1072	2418	793	269	91	512	684	25.0294	5.36963	4.16472	8.83995	18.8135	6.06464	2.08881	0.771533	4.05577	5.359	0.00719971	-1.72455	down
ENSMUSG00000001739	Cldn15	655	338	223	422	337	214	143	133	246	103	8.93657	4.31289	3.19974	6.20006	4.65085	2.92192	1.98179	2.01839	3.46735	1.40489	5.93814e-05	-1.17989	down
NewGene_811	NewGene_811	73	62	85	77	30	84	98	84	80	127	1.05423	0.725601	1.15501	1.39823	0.397405	1.31731	1.53363	1.74281	1.28071	2.62927	0.0361886	0.604051	up
ENSMUSG00000031523	Dlc1	1907	835	1069	1409	914	908	683	396	1365	393	7.86249	3.18193	4.74642	6.25667	3.92579	3.68036	2.82173	1.79771	5.84783	1.64017	0.0254583	-0.68227	down
ENSMUSG00000025780	Itih5	2978	1119	963	1883	1353	1001	903	434	1765	848	9.53501	3.36334	3.24719	6.5018	4.40841	3.20757	2.93876	1.54931	5.85405	2.78291	0.02022	-0.722586	down
ENSMUSG00000031298	Adgrg2	363	56	77	182	434	44	39	13	101	102	2.09055	0.282049	0.434651	1.06507	2.39114	0.235269	0.212881	0.073032	0.557072	0.560108	0.000782789	-1.9818	down
ENSMUSG00000028128	F3	893	747	452	547	362	308	502	194	426	399	12.0679	9.46628	6.42762	7.9748	4.97192	4.15869	6.8919	2.91816	5.96242	5.52103	0.00712403	-0.663688	down
ENSMUSG00000027203	Dut	142	135	183	190	103	184	228	157	190	345	2.52316	2.51939	3.62579	4.24779	2.03533	3.05792	4.52384	3.06762	3.84833	8.42951	0.0161042	0.593048	up
ENSMUSG00000027208	Fgf7	188	136	164	129	96	297	270	163	287	397	1.81407	1.21185	1.66534	1.38102	0.96923	3.03544	2.72246	1.84058	2.84656	4.49899	2.87978e-06	1.02879	up
NewGene_7847	NewGene_7847	54	42	73	67	20	131	92	142	72	49	0.735345	0.56249	0.7549	0.89254	0.197449	1.28673	1.58324	1.55538	0.726637	0.487662	0.0134898	1.05408	up
ENSMUSG00000029314	Gpat3	1088	287	250	619	1128	360	250	125	312	372	10.2243	2.74709	2.38355	6.19713	9.9027	3.03643	2.78598	1.40409	3.12803	3.15232	0.00275794	-1.27022	down
ENSMUSG00000007476	Lrrc8a	781	975	733	823	515	464	384	260	663	466	4.5919	5.37831	4.53749	5.21732	3.07896	2.79615	2.29959	1.70215	4.0397	2.80949	0.000105349	-0.750353	down
ENSMUSG00000022246	Rai14	422	440	479	457	235	231	200	189	318	238	2.24625	2.20303	2.60011	2.62791	1.22926	1.18928	1.04709	1.0816	1.6936	1.25314	5.04492e-05	-0.742042	down
ENSMUSG00000059173	Pde1a	457	147	189	162	296	155	90	88	173	91	3.1379	0.902122	1.33641	1.09885	1.9264	1.00004	0.543578	0.604385	1.05856	0.61101	0.00277674	-1.03857	down
ENSMUSG00000047731	Wbp1l	4881	5201	5792	6978	3910	2614	2743	2168	3350	2773	31.7237	31.7644	39.8281	48.8713	25.9706	17.0756	18.1015	15.6719	22.4674	18.0796	1.65448e-11	-0.931996	down
ENSMUSG00000030048	Gkn3	33	59	66	35	22	29	72	124	199	63	0.965981	1.61332	2.0309	1.09743	0.637888	0.832152	2.14725	4.08273	6.08451	1.88857	0.0127194	1.22093	up
ENSMUSG00000029482	Aacs	958	230	294	592	1112	442	123	151	404	164	7.47596	1.68047	2.41481	4.98784	8.83933	3.44858	0.974142	1.30785	3.26577	1.31063	0.00451378	-1.336	down
ENSMUSG00000031503	Col4a2	5804	4572	3918	4240	1896	2548	2016	1274	3240	1917	22.7646	16.8318	16.1841	17.9378	7.56875	10.0007	8.04045	5.57554	13.1654	7.70994	0.000281523	-0.839484	down
ENSMUSG00000005360	Slc1a3	1801	126	139	996	1407	406	90	50	369	127	10.987	0.716863	0.885078	6.5246	8.72614	2.46464	0.552234	0.332814	2.31937	0.785966	0.0114137	-2.12297	down
ENSMUSG00000004098	Col5a3	1278	523	433	759	707	345	164	133	393	490	5.28134	2.0271	1.88425	3.38285	2.97312	1.42477	0.685437	0.610294	1.68156	2.07444	0.000200539	-1.26246	down
NewGene_9592	NewGene_9592	45	43	58	53	37	64	76	60	71	72	0.746578	0.763335	1.13402	0.937611	0.590211	1.18329	1.28235	1.15782	1.10533	1.71157	0.0187196	0.585324	up
ENSMUSG00000079243	Xirp1	2631	3300	1895	1837	1163	1479	1451	937	1374	1520	11.466	13.4902	8.69602	8.65009	5.15375	6.46323	6.46415	4.56029	6.20433	6.7528	0.00427075	-0.617019	down
ENSMUSG00000035049	Rrp12	671	891	547	529	499	258	361	417	648	256	3.90727	4.87243	3.35374	3.32417	2.95839	1.50289	2.13396	2.71231	3.91177	1.52659	0.0142273	-0.651712	down
ENSMUSG00000021974	Fgf9	48	39	40	35	21	32	64	57	118	77	0.37092	0.297889	0.385664	0.351806	0.192968	0.220521	0.493135	0.588047	1.12349	0.70824	0.00649999	0.963215	up
ENSMUSG00000037190	Cyb561d2	145	98	115	154	96	164	144	122	156	321	2.82827	1.96297	2.28877	3.05076	1.73381	2.45863	2.62354	2.61045	3.19387	4.77054	0.0247358	0.614534	up
ENSMUSG00000070871	Ccnyl1	1043	964	1446	1345	894	1550	2101	1952	1847	1794	8.75361	7.5118	12.6902	13.1644	7.48106	13.7076	18.9121	18.2936	16.4295	14.1865	3.8029e-05	0.757635	up
ENSMUSG00000043671	Dpy19l3	122	108	131	114	39	106	161	81	175	276	0.384444	0.320094	0.433476	0.387122	0.124142	0.333082	0.517326	0.285163	0.569879	0.891661	0.0474247	0.678121	up
ENSMUSG00000029722	Agfg2	417	444	220	451	182	197	150	169	246	86	3.67039	3.6425	2.02689	4.26133	1.61188	1.71615	1.32806	1.64051	2.2344	0.768308	0.00259108	-0.936691	down
ENSMUSG00000020642	Rnf144a	1037	783	677	789	535	537	293	299	740	306	5.28822	3.62342	3.57255	4.34628	2.66732	2.62854	1.45675	1.63087	3.90494	1.5363	0.00163296	-0.775743	down
ENSMUSG00000020641	Rsad2	309	282	261	313	145	159	85	83	267	44	2.06714	1.76629	1.83569	2.2565	0.89007	0.959953	0.52109	0.553359	1.84872	0.266997	0.00855642	-1.00612	down
ENSMUSG00000020644	Id2	189	147	191	136	64	304	180	160	259	705	3.74906	2.73259	3.99264	2.92895	1.28298	6.18128	3.66159	3.56651	5.35525	14.3774	0.00170047	1.18884	up
ENSMUSG00000020649	Rrm2	54	49	42	33	13	43	37	27	49	570	0.619626	0.530282	0.501479	0.403554	0.14238	0.493998	0.432385	0.347387	0.575657	6.74267	0.0080643	1.94307	up
ENSMUSG00000024349	Sting1	182	162	180	133	90	255	203	131	398	379	1.99435	1.86272	2.08027	1.65053	1.00081	2.81731	2.37577	1.73307	4.64036	4.27477	0.000852971	0.88988	up
ENSMUSG00000040618	Pck2	617	520	338	480	458	360	293	257	475	133	3.53804	2.86652	2.22644	3.2273	2.96656	1.96914	2.08427	1.56696	3.00401	0.743246	0.027959	-0.630697	down
ENSMUSG00000019326	Aoc3	4569	506	532	2502	1970	1176	288	194	1035	573	26.3393	2.72799	3.22826	15.5418	11.5303	6.76968	1.68137	1.24445	6.21962	3.37907	0.020203	-1.59374	down
ENSMUSG00000056973	Ces1d	13012	1035	1010	4688	7963	3023	918	955	2354	455	164.288	12.2618	13.4306	63.8445	102.302	38.1837	11.7792	13.4417	30.7827	5.88595	0.0207077	-1.81249	down
NewGene_6498	NewGene_6498	67	41	123	50	45	138	205	119	138	65	0.382479	0.218604	0.743386	0.345928	0.279756	0.825624	1.28484	0.763234	0.899897	0.543267	0.00569694	1.08877	up
ENSMUSG00000057738	Sptan1	3485	3154	2948	3212	1536	2142	1587	1345	2638	1316	11.211	9.37654	9.84007	10.9701	4.93986	6.76401	5.11296	4.74448	8.73431	4.26019	0.00324078	-0.61086	down
ENSMUSG00000102976	Zc3h11a	178	34	47	27	25	2373	9	21	187	2553	1.96741	0.75128	1.47646	0.933305	0.737096	13.6669	0.234577	0.537685	2.46658	15.068	0.000868595	4.1436	up
ENSMUSG00000020253	Ppm1m	924	264	237	525	727	296	212	147	317	278	12.7401	3.38606	3.41465	7.75328	10.1557	4.05025	2.94972	2.23716	4.52838	3.90227	0.0024428	-1.09004	down
ENSMUSG00000036438	Calm2	7191	4563	11222	7761	3368	9054	12529	8618	9739	12237	151.723	90.6669	248.172	175.993	71.9566	190.217	267.467	203.097	212.338	263.454	0.00826736	0.679066	up
ENSMUSG00000031808	Slc27a1	8061	3109	2361	3954	7924	3719	1937	1922	3207	1735	74.6124	26.9909	23.2447	39.4094	74.4722	34.3309	18.3851	19.9394	30.8172	16.0973	0.00463628	-1.01245	down
ENSMUSG00000042807	Hecw2	651	552	570	562	193	315	177	230	255	137	1.46219	1.16382	1.34774	1.36061	0.44052	0.707139	0.40214	0.57485	0.591582	0.315171	0.000329771	-1.08205	down
ENSMUSG00000035273	Hpse	53	33	13	38	15	45	37	18	48	262	0.426765	0.245236	0.110577	0.325837	0.120164	0.359472	0.302063	0.159759	0.398899	2.17441	0.023247	1.46214	up
ENSMUSG00000046324	Ermp1	1182	587	523	759	804	628	457	273	566	509	4.23469	1.97415	1.97163	2.93303	2.93031	2.25002	1.66428	1.08969	2.10072	1.87029	0.00901298	-0.636158	down
ENSMUSG00000117679	Apbb3	976	1570	778	768	1562	591	592	504	707	1003	12.0692	18.3091	10.162	10.1528	19.694	7.27395	7.519	6.93879	9.05468	12.5782	0.00871836	-0.747624	down
NewGene_8785	NewGene_8785	48	35	30	20	28	34	96	56	39	66	0.757901	0.554831	0.524579	0.338001	0.449782	0.539448	1.67644	0.992655	0.649017	1.2198	0.0219236	0.922896	up
ENSMUSG00000067235	H2-Q10	1629	34	133	777	1391	568	81	26	128	29	27.8979	0.482922	2.37563	14.3307	24.2595	9.74138	1.39867	0.48806	2.24137	0.462474	0.040313	-2.23295	down
ENSMUSG00000041773	Enc1	354	247	120	200	213	133	76	61	143	75	1.88827	1.23774	0.673264	1.14953	1.15309	0.705654	0.408782	0.358317	0.788436	0.407148	0.000146862	-1.18198	down
ENSMUSG00000002944	Cd36	58920	36279	26698	38874	30310	31129	16682	12238	24190	19158	492.233	289.243	241.926	352.491	270.159	266.435	142.009	106.817	209.673	149.119	0.000313583	-0.835504	down
ENSMUSG00000037722	Gnpnat1	65	75	70	59	67	92	66	63	61	1109	0.654597	0.613468	0.651042	0.559204	0.677705	0.867837	0.602104	0.656455	0.556208	10.3203	0.0174921	2.01489	up
ENSMUSG00000020474	Polm	161	135	153	101	50	105	231	139	228	168	1.38528	1.09115	1.39094	0.941412	0.442229	0.905002	2.04609	1.43373	2.04142	1.49004	0.0462106	0.601544	up
ENSMUSG00000052135	Foxo6	52	41	45	40	4	99	108	58	100	24	0.495726	0.364848	0.451872	0.413018	0.039254	0.951587	1.05628	0.623532	0.998732	0.236739	0.0263368	1.19825	up
ENSMUSG00000070780	Rbm47	209	18	24	65	180	81	8	4	21	48	1.01112	0.078814	0.1225	0.341535	0.887787	0.39117	0.037255	0.018166	0.104228	0.234748	0.0387065	-1.62654	down
ENSMUSG00000033610	Pank1	943	1452	545	582	843	664	371	329	410	530	4.80067	5.62372	1.96595	2.14635	2.92871	2.51697	1.31699	1.24893	1.45384	1.85241	0.00240099	-0.885088	down
ENSMUSG00000029217	Tec	217	201	151	172	99	269	253	177	281	261	2.04928	1.8154	1.5098	1.75619	0.950406	2.54811	2.45578	1.86283	2.76538	2.54153	0.000806389	0.619958	up
ENSMUSG00000034936	Arl4d	522	1004	324	585	968	226	199	195	334	169	9.5491	17.2514	6.23766	11.536	18.0174	4.12319	3.69854	3.97215	6.3212	3.1636	1.20344e-06	-1.61076	down
ENSMUSG00000078771	Evi2a	162	184	154	144	97	192	209	137	270	813	2.73318	2.86124	2.68634	2.64969	1.67722	2.56652	3.58956	2.60277	4.62709	14.377	0.00406888	1.14045	up
ENSMUSG00000035783	Acta2	3784	4731	4855	3524	1119	2806	1868	1316	2599	1727	47.2646	55.468	63.7391	47.7882	14.8832	34.905	23.6808	18.3642	33.7702	22.0138	0.0128579	-0.739046	down
NewGene_4821	NewGene_4821	61	65	75	80	66	122	74	81	93	201	1.04968	0.930441	1.29381	1.60217	1.30662	2.20956	1.34058	1.81607	1.85587	3.91616	0.0180933	0.741356	up
ENSMUSG00000031442	Mcf2l	1997	1818	1702	1937	866	1012	605	575	835	419	12.4617	11.8418	12.9343	19.5005	5.44845	8.16019	5.27387	6.01746	6.2616	1.78384	1.42327e-06	-1.19534	down
ENSMUSG00000001020	S100a4	356	464	382	252	282	480	356	257	766	1810	18.148	22.2095	20.4197	13.8218	14.5867	24.4529	18.3751	14.5503	40.2953	94.3448	0.00852118	1.06374	up
ENSMUSG00000031453	Rasa3	1871	862	562	1091	1054	622	576	464	858	973	10.7893	4.64642	3.4166	6.79917	6.15814	3.57171	3.36425	2.97329	5.10609	5.73053	0.0236729	-0.605532	down
ENSMUSG00000021260	Hhipl1	161	195	156	160	72	97	49	85	162	65	0.786716	0.890718	0.80258	0.839337	0.355683	0.470275	0.242167	0.460853	0.818779	0.321844	0.0499416	-0.647409	down
ENSMUSG00000021265	Slc25a29	157	191	168	177	118	341	268	205	238	347	2.00754	2.28668	2.25389	2.43595	1.53029	4.36488	3.47746	2.91467	3.14732	4.54766	3.52242e-05	0.835401	up
ENSMUSG00000021196	Pfkp	550	323	442	490	315	252	194	132	311	176	3.39851	1.84665	2.84151	3.65414	1.95216	1.53396	1.20043	0.898143	1.96328	1.09843	7.98272e-06	-0.957215	down
ENSMUSG00000022555	Dgat1	2556	399	342	1081	2693	665	321	280	708	460	34.2464	5.0161	4.82649	15.6183	36.7159	8.90638	4.3706	4.18151	9.8262	6.31373	0.0129894	-1.56971	down
ENSMUSG00000035606	Ky	2459	1339	5446	3691	838	3427	6082	4839	9192	3935	10.6565	5.44414	24.8626	17.2543	3.69354	14.864	26.8017	23.4015	41.276	17.4904	0.00757395	1.04995	up
ENSMUSG00000032372	Plscr2	99	113	80	110	63	250	166	97	247	83	1.49299	1.46039	1.19005	1.7202	0.855707	3.38281	2.33131	1.70918	3.56016	1.12779	0.00604706	0.897652	up
NewGene_6782	NewGene_6782	828	811	841	896	1164	1406	1115	1096	886	2475	14.8876	13.6778	15.9142	18.322	21.2986	25.3015	20.3783	21.9798	16.493	45.6402	0.026384	0.629917	up
ENSMUSG00000026640	Plxna2	1172	940	1216	1317	344	355	381	257	480	370	2.68574	2.02103	2.93451	3.25504	0.801738	0.813068	0.886072	0.65666	1.13825	0.868677	1.5096e-07	-1.37125	down
NewGene_7162	NewGene_7162	195	211	184	201	247	304	280	240	177	687	5.75687	5.87057	5.66725	6.39067	7.45485	9.02823	8.42082	7.92929	5.43125	20.5691	0.0343713	0.713803	up
NewGene_6414	NewGene_6414	38	26	73	83	50	135	95	119	83	76	0.939194	0.555116	1.63666	1.92557	1.15248	3.45614	2.03981	2.90527	2.0945	1.75167	0.0117741	0.976384	up
ENSMUSG00000070354	Evi2	24	47	18	37	39	74	36	16	60	383	0.148676	0.282933	0.120009	0.247691	0.248607	0.470083	0.229443	0.107975	0.39719	2.528	0.00982865	1.73537	up
ENSMUSG00000089873	Mup13	621	136	123	53	464	51	31	16	296	75	15.9615	3.27465	3.32863	1.44436	12.1389	1.30711	0.791859	0.433006	7.88273	1.97624	0.0486623	-1.68032	down
ENSMUSG00000028195	Ccn1	3030	3409	2345	2173	1942	3804	4652	2316	4677	5268	37.9705	40.0943	30.9395	29.3641	24.7658	47.7033	59.2655	32.3804	60.7114	67.6873	0.000132919	0.712581	up
ENSMUSG00000017737	Mmp9	150	55	111	92	145	25	45	29	102	99	1.18548	0.410153	0.923687	0.784926	1.16417	0.196921	0.362552	0.256066	0.832765	0.808701	0.0342761	-0.921037	down
ENSMUSG00000015468	Notch4	672	641	631	617	266	393	291	197	627	112	2.59202	2.30698	2.57221	2.55268	1.04921	1.50666	1.13446	0.840761	2.49914	0.440426	0.0326698	-0.763616	down
ENSMUSG00000040740	Slc25a34	466	798	309	507	354	415	315	265	309	133	4.40873	7.0944	3.07752	5.18081	3.40711	3.92987	3.02815	2.80026	3.03076	1.28675	0.0322147	-0.69108	down
ENSMUSG00000025270	Alas2	214	320	276	155	207	175	89	89	204	34	2.65788	3.78318	3.61625	2.06704	2.63113	2.17441	1.18982	1.22838	2.63248	0.427575	0.0159831	-0.968087	down
ENSMUSG00000020354	Sgcd	223	153	123	121	198	86	82	119	118	74	3.48683	2.24448	2.01161	2.03248	3.13718	1.34411	1.2968	2.07063	1.86483	1.14156	0.0136602	-0.725159	down
ENSMUSG00000038642	Ctss	669	379	190	190	288	871	179	105	568	5266	12.4688	6.61385	3.70991	3.81338	5.46368	16.2734	3.36835	2.18031	10.9738	100.822	0.0286599	2.02174	up
ENSMUSG00000005087	Cd44	336	253	374	294	130	401	312	162	503	1644	1.51171	1.11704	1.88887	1.42729	0.593146	1.80667	1.42518	0.81048	2.62485	7.59683	0.0128608	1.13629	up
NewGene_2021	NewGene_2021	12932	2474	1375	3755	10430	2477	1286	615	2178	2576	67.936	12.1883	7.60407	21.2462	55.9991	12.9743	6.92467	3.61709	11.8839	13.8284	0.00355193	-1.78327	down
ENSMUSG00000051736	Fam229b	63	60	66	50	120	101	131	72	83	298	2.11884	1.8403	2.31293	1.81502	4.14496	3.42198	4.48313	2.67786	2.93864	10.3174	0.0417713	0.893745	up
ENSMUSG00000026556	Vangl2	44	48	32	31	14	80	40	52	81	34	0.169612	0.173582	0.12873	0.128685	0.053852	0.310055	0.15466	0.222648	0.323111	0.134262	0.0342795	0.839887	up
ENSMUSG00000061536	Sec22c	125	97	162	171	129	152	220	182	281	285	0.553465	0.402593	0.75236	0.814163	0.581365	0.671789	0.98745	0.995738	1.29855	1.29142	0.00206793	0.730581	up
ENSMUSG00000021728	Emb	74	50	37	55	63	74	43	37	126	330	0.629587	0.400069	0.333265	0.501479	0.549846	0.633897	0.368157	0.349223	1.12349	2.92914	0.0347485	1.09881	up
ENSMUSG00000068699	Flnc	12002	14239	7571	8428	6222	5713	6094	5234	7533	5353	33.5997	37.4133	22.323	25.4478	17.7231	16.0047	17.3443	16.345	22.0872	15.3672	0.000783653	-0.634738	down
ENSMUSG00000020097	Sgpl1	1913	588	425	870	1659	758	441	315	817	748	11.8082	3.41267	2.75048	5.8037	10.4444	4.61408	2.63813	2.16118	5.18097	4.44985	0.030895	-0.836792	down
ENSMUSG00000037411	Serpine1	875	829	244	349	345	353	183	79	481	260	7.34657	6.53785	2.15177	3.15813	2.9423	2.96154	1.56195	0.737162	4.17945	2.24016	0.0209252	-0.943054	down
ENSMUSG00000031712	Il15	219	219	267	267	186	502	362	394	379	230	3.79356	3.01805	5.83787	4.59521	3.13816	6.777	6.27089	6.22277	7.59237	4.38203	0.00196718	0.755981	up
ENSMUSG00000043556	Fbxl7	194	150	136	141	46	80	56	67	137	45	1.05503	0.76422	0.777627	0.827996	0.250144	0.434236	0.307011	0.403047	0.770015	0.248893	0.0465922	-0.72118	down
ENSMUSG00000044786	Zfp36	1422	1247	1008	933	1274	1313	563	283	765	833	12.9501	10.625	9.61747	9.20155	11.7558	11.9069	5.42303	2.84876	7.25156	7.73521	0.0375503	-0.637658	down
ENSMUSG00000044122	Proca1	178	21	28	59	117	53	24	13	49	13	3.31189	0.359876	0.541099	1.46118	2.73056	1.08049	0.478433	0.253006	1.08013	0.229868	0.0242618	-1.39603	down
ENSMUSG00000041571	Selenow	17840	18304	24357	23095	36386	33392	40034	37632	23452	51747	613.273	590.612	881.936	856.397	1272.9	1148.73	1399.28	1443.35	835.229	1824.2	0.0297688	0.642253	up
ENSMUSG00000057440	Mpp7	307	152	217	158	169	119	138	61	138	108	1.56184	0.727004	1.16362	0.861485	0.871092	0.611243	0.723377	0.342162	0.723045	0.56042	0.00181581	-0.794881	down
ENSMUSG00000021097	Clmn	766	181	184	312	817	211	105	63	223	150	1.76315	0.435986	0.416234	0.765207	1.92282	0.46875	0.234729	0.148372	0.517552	0.327901	0.000499481	-1.62689	down
ENSMUSG00000105504	Gbp5	138	162	173	165	78	301	279	158	468	138	1.12475	1.24849	1.5064	1.42694	0.531735	2.02489	2.34839	1.42634	3.97842	0.95062	0.00270851	0.938312	up
ENSMUSG00000038173	Enpp6	59	82	70	52	17	17	13	11	47	0	0.322837	0.39142	0.373167	0.282806	0.207234	0.081783	0.065356	0.058617	0.244092	0	0.0213278	-1.64545	down
ENSMUSG00000029321	Slc10a6	359	350	166	244	196	122	77	106	180	239	4.27312	3.90472	2.07785	3.12622	2.36817	1.44256	0.923868	1.39845	2.21469	2.9127	0.00634736	-0.824859	down
ENSMUSG00000042505	Sdhaf3	549	447	623	663	768	912	864	765	628	1417	3.21249	2.45346	3.83612	4.18156	4.56979	5.33777	5.13961	4.99481	3.80586	8.50073	0.0215282	0.604821	up
ENSMUSG00000040212	Emp3	324	264	296	319	187	418	319	168	503	691	11.2291	8.45484	10.689	11.7605	6.63077	14.3593	11.1269	6.41161	17.894	24.2767	0.025915	0.611104	up
ENSMUSG00000027187	Cat	22492	9141	6432	9489	20725	7475	6040	4408	8687	8087	217.795	83.0718	65.5973	99.1045	204.212	72.4255	59.4568	47.6125	87.142	80.3003	0.00262434	-0.982377	down
NewGene_2996	NewGene_2996	56	60	46	59	54	79	77	114	64	67	0.6186	0.626329	0.533306	0.705258	0.601509	0.870467	0.867398	1.41334	0.739139	0.763555	0.0474633	0.622752	up
ENSMUSG00000037020	Wdr62	241	334	149	103	224	106	134	74	129	184	1.59953	2.14485	0.838332	0.611781	1.64032	0.600191	0.718548	0.564019	0.963007	0.996378	0.0272226	-0.736196	down
ENSMUSG00000022793	B4galt4	623	533	444	560	325	277	258	197	363	208	6.83629	5.61393	5.17762	6.88995	3.82275	3.03995	3.05353	2.48607	4.39302	2.33184	7.57929e-07	-0.880319	down
ENSMUSG00000028834	Trim63	38081	83951	19912	30572	46647	8843	11426	9761	14171	21652	510.885	1057.13	281.351	442.396	636.828	118.705	155.836	146.092	196.949	297.865	3.35252e-07	-1.73029	down
ENSMUSG00000028836	Slc30a2	783	1140	652	499	864	451	444	566	475	414	6.33599	8.88481	6.58805	4.78855	7.11859	4.01438	4.19636	6.02052	4.00654	3.39968	0.00714485	-0.696167	down
ENSMUSG00000022425	Enpp2	3327	1211	740	1631	1625	830	772	444	1798	711	27.8493	9.7879	6.46311	14.7406	14.5268	7.20389	6.94249	4.38591	15.4391	5.95891	0.0114083	-0.893002	down
ENSMUSG00000036863	Syde2	354	136	94	214	280	107	59	35	120	182	1.62558	0.586083	0.454491	1.17066	1.3112	0.48885	0.27493	0.177477	0.571231	0.85486	0.00972843	-1.11336	down
ENSMUSG00000033910	Gucy1a1	1439	1398	1245	1140	365	690	576	468	1024	435	7.99258	7.28617	7.28125	6.8278	1.99347	3.70643	3.14175	2.80421	5.89218	2.39523	0.0114436	-0.741335	down
ENSMUSG00000024481	Lvrn	839	784	449	787	609	293	342	214	419	732	4.24581	3.74966	2.44053	4.29896	3.14594	1.47515	1.79098	1.23398	2.18734	3.78594	0.00433981	-0.778721	down
ENSMUSG00000086316	Nbdy	442	437	366	475	457	695	593	503	418	1065	14.0807	12.5775	11.8733	16.154	14.6196	21.9018	18.8975	17.8553	13.2492	34.5024	0.0132038	0.620932	up
ENSMUSG00000047945	Marcksl1	44	15	43	33	39	51	69	19	77	159	0.688707	0.213371	0.710325	0.556953	0.61464	0.80139	1.10176	0.324097	1.25648	2.55926	0.0281062	1.0845	up
ENSMUSG00000034361	Cpne2	511	410	322	324	409	174	252	161	390	294	5.51127	4.15189	3.6623	3.77884	4.4931	1.9201	2.7653	1.93512	4.39858	3.25187	0.00557365	-0.63246	down
NewGene_1277	NewGene_1277	6891	344	157	2230	6091	1432	217	41	344	308	36.3649	1.71175	0.866887	12.7856	32.9351	7.61855	1.16357	0.238918	1.89461	1.66469	0.0106511	-2.7505	down
ENSMUSG00000041040	Fam117b	1299	1326	653	1130	631	566	424	298	554	532	5.93742	5.70577	3.14564	5.57049	2.93277	2.58883	1.96877	1.52036	2.62379	2.52323	2.22656e-06	-1.0335	down
ENSMUSG00000062515	Fabp4	115198	28072	24353	57239	77300	33244	15882	12381	33425	18819	3253.1	744.06	724.325	1743.5	2221.33	939.406	455.976	390.055	977.859	544.947	0.000272399	-1.39421	down
ENSMUSG00000039304	Tnfsf10	456	414	533	427	202	613	761	403	1090	385	2.38945	1.96822	3.04639	2.33358	1.0399	3.22239	3.98417	2.33812	5.78092	1.99625	0.00982819	0.716855	up
ENSMUSG00000029778	Adcyap1r1	296	112	86	207	262	53	75	45	201	48	1.4793	0.434822	0.372842	0.921389	1.17114	0.218051	0.312136	0.207765	0.894316	0.201808	0.00680217	-1.22662	down
ENSMUSG00000029641	Rasl11a	126	106	141	115	45	26	20	32	61	57	2.81487	2.22881	3.32892	2.77834	1.02505	0.5716	0.444741	0.784209	1.4092	1.30698	0.000151359	-1.39784	down
ENSMUSG00000074971	Fibin	881	1114	708	955	1461	509	443	252	750	586	9.82412	11.6646	8.3228	11.4859	16.5934	5.67498	5.02341	3.12978	8.66573	6.7047	0.000165568	-1.04996	down
ENSMUSG00000040624	Plekhg1	379	414	304	425	126	159	133	87	213	41	1.29999	1.33388	1.09605	1.57358	0.440212	0.544896	0.464275	0.332058	0.755026	0.144031	0.000571431	-1.31749	down
NewGene_6169	NewGene_6169	552	651	847	791	930	1176	1250	981	674	1653	12.6077	13.7177	20.5038	19.1844	21.111	26.7898	28.959	24.8236	15.7499	39.8111	0.0240009	0.624097	up
NewGene_6168	NewGene_6168	22	26	26	18	27	42	69	38	42	101	0.693764	0.754031	0.803524	0.561218	0.814304	1.2097	2.25516	1.18467	1.28711	3.25903	0.000889961	1.30804	up
ENSMUSG00000057335	Cep170	983	692	976	851	682	461	528	345	717	519	5.72691	3.73824	6.37473	5.31504	3.74045	1.73218	2.8508	1.61633	2.75419	1.9659	1.58095e-05	-0.677263	down
ENSMUSG00000000435	Myf5	90	93	128	106	49	128	148	130	157	169	1.08635	1.0566	1.62602	1.38212	0.596711	1.54899	1.81659	1.75385	1.96608	2.09728	0.002874	0.70937	up
ENSMUSG00000022122	Ednrb	1291	856	1293	1069	500	661	618	317	1001	589	8.94808	5.81647	9.61605	7.87775	3.67101	4.50096	4.74605	2.63693	6.99946	3.71825	0.013831	-0.617558	down
ENSMUSG00000066361	Serpina3c	960	78	80	550	488	86	98	24	238	172	10.9758	0.827477	0.961539	6.77762	5.676	0.972812	1.12858	0.297135	2.80892	2.01542	0.0155702	-1.81971	down
ENSMUSG00000025479	Cyp2e1	60532	5473	2778	18832	67914	8938	2686	1638	11538	4205	839.677	71.007	40.4178	281.643	959.824	123.617	37.7743	25.2371	166.274	59.5104	0.00213044	-2.50336	down
ENSMUSG00000039911	Spsb1	907	1158	657	766	700	388	340	239	392	273	7.42952	8.97345	5.65851	6.80464	5.82121	3.17548	2.83536	2.18131	3.32795	2.28385	7.08112e-12	-1.32015	down
ENSMUSG00000060791	Gmfg	50	47	55	52	48	21	43	52	95	379	1.93938	1.72588	2.29175	2.12972	1.92862	0.813775	1.72882	2.2662	3.84057	15.2963	0.0467035	1.20135	up
ENSMUSG00000071637	Cebpd	4038	8883	943	5875	8303	1567	1453	861	2491	3008	27.2733	56.3112	6.70156	42.7965	57.0668	10.5884	9.97739	6.48449	17.4308	20.8283	0.00391702	-1.62972	down
ENSMUSG00000034158	Lrrc58	6384	5791	2823	4666	5357	3004	2230	1225	2314	3736	18.7722	15.983	8.74291	14.7999	16.0302	8.83926	6.66559	4.01842	7.04938	11.2638	0.000217674	-0.985757	down
ENSMUSG00000029561	Oasl2	143	69	114	120	79	157	91	118	251	224	1.15258	0.532572	0.966829	1.05067	0.647757	1.26503	0.744976	1.05868	2.22166	1.85331	0.0145286	0.707961	up
ENSMUSG00000008348	Ubc	33104	107819	22924	23129	33834	14035	14993	4108	16714	26566	321.082	980.292	234.025	241.592	334.381	135.801	147.602	44.4663	168.183	263.6	0.0100806	-1.53997	down
ENSMUSG00000028364	Tnc	94	38	77	37	27	53	137	44	192	176	0.332498	0.124817	0.287948	0.141364	0.096504	0.1859	0.49507	0.17416	0.705787	0.640851	0.00883897	1.16158	up
ENSMUSG00000041741	Pde3a	494	419	543	362	147	209	187	141	307	264	1.0151	0.80839	1.17582	0.802319	0.307114	0.428715	0.390927	0.321688	0.653541	0.556182	0.00506595	-0.775066	down
ENSMUSG00000027776	Il12a	228	116	238	200	315	435	532	502	300	670	4.41176	2.09616	4.85611	4.18676	6.20722	8.43673	10.4923	10.875	6.0159	13.3323	0.000280056	1.17707	up
NewGene_10627	NewGene_10627	62	81	75	60	103	115	141	93	87	148	1.49042	1.93524	2.00587	1.47535	2.67925	3.2307	3.59597	2.71511	2.16037	4.1273	0.0401056	0.627368	up
ENSMUSG00000089762	Ier5l	82	98	178	102	38	174	116	132	174	193	0.766772	0.86522	1.7587	1.03479	0.36295	1.64097	1.10436	1.38317	1.6951	1.86203	0.0313962	0.721429	up
ENSMUSG00000050930	Map10	219	293	257	198	149	234	283	197	300	656	1.56272	1.96129	1.92672	1.52555	1.07597	1.66857	2.04918	1.56774	2.21362	4.80152	0.0431534	0.605985	up
ENSMUSG00000036009	Mettl25	123	128	129	149	82	124	197	177	128	258	1.52631	1.519	1.69872	2.14459	0.976272	1.45661	2.36033	2.51806	1.63143	3.28089	0.0238736	0.599105	up
ENSMUSG00000036006	Ripor2	215	211	296	224	253	153	72	130	194	46	1.10671	1.08218	1.72318	1.22593	1.35427	0.750001	0.422701	0.713649	1.00467	0.295481	0.00633424	-0.982549	down
ENSMUSG00000021356	Irf4	302	213	58	94	2296	197	68	19	169	83	1.60235	1.05707	0.323369	0.532858	12.4013	1.04637	0.366578	0.110335	0.926181	0.449936	0.00988054	-2.68408	down
ENSMUSG00000029128	Rab28	2753	2420	2859	2909	2916	4145	4324	4184	2496	4977	41.338	34.1222	45.1103	47.0867	44.8201	62.1138	65.8171	69.9429	38.9386	76.2988	0.00819554	0.591479	up
ENSMUSG00000038349	Plcl1	274	290	293	176	134	205	149	101	191	65	1.05003	1.04385	1.18309	0.728206	0.521276	0.786008	0.578797	0.429764	0.760866	0.254124	0.0420341	-0.657369	down
ENSMUSG00000009772	Nuak2	37	24	34	27	15	40	29	24	64	97	0.294909	0.181207	0.28368	0.229558	0.120219	0.319122	0.231886	0.21073	0.537195	0.803964	0.0330297	0.914116	up
ENSMUSG00000045092	S1pr1	4260	4245	3390	3984	1912	2696	1803	1305	3173	1784	35.3796	33.0943	29.6507	35.6942	16.1585	22.4058	15.2262	12.0932	27.2982	15.1889	0.00185557	-0.67944	down
ENSMUSG00000045095	Magi1	309	188	247	245	90	125	89	104	218	104	1.03693	0.606327	0.834781	0.934291	0.293532	0.397074	0.295456	0.420508	0.764582	0.337898	0.0208037	-0.692495	down
ENSMUSG00000040312	Cchcr1	63	61	45	61	33	21	32	25	48	9	0.528383	0.478361	0.388539	0.550566	0.273593	0.185382	0.296952	0.225928	0.410388	0.074253	0.0301436	-0.909774	down
ENSMUSG00000050103	Agmo	657	187	207	393	577	287	165	82	312	99	6.8683	1.83216	2.27503	4.4648	6.14094	3.01554	1.74203	0.95058	3.39463	1.05391	0.00978451	-1.1072	down
ENSMUSG00000014158	Trpv4	131	110	114	117	64	30	32	48	97	63	1.01837	0.806495	0.937251	0.974971	0.50688	0.23369	0.249439	0.418837	0.783519	0.498881	0.00352381	-0.953742	down
ENSMUSG00000102748	Pcdhgb2	104	64	222	355	253	17	28	19	147	30	0.562577	0.324605	1.26699	2.07696	1.39597	0.089625	0.151956	0.113528	0.826188	0.161451	0.000266226	-2.14792	down
ENSMUSG00000039384	Dusp10	1637	2280	1644	1116	571	2574	3442	2327	4012	3460	14.9556	20.0852	15.6824	10.9082	5.2516	23.342	31.698	23.528	38.9332	32.253	5.67765e-06	1.18408	up
ENSMUSG00000022508	Bcl6	2050	1903	2931	1557	1008	968	1234	831	1345	1535	14.7142	12.8175	22.1515	12.0481	7.35819	6.94923	9.00033	6.6493	9.99899	11.292	0.00558905	-0.632054	down
NewGene_4185	NewGene_4185	70	67	76	67	38	107	53	62	149	99	0.538234	0.483281	0.620351	0.56035	0.297257	0.82841	0.413129	0.538545	1.25918	0.785328	0.0488602	0.593979	up
NewGene_10012	NewGene_10012	33	26	34	32	56	63	46	172	30	190	1.17413	0.889066	1.30322	1.24365	2.06736	2.28088	1.70776	7.00011	1.13741	7.09947	0.00588855	1.52388	up
ENSMUSG00000028024	Enpep	711	403	457	472	298	223	219	165	427	198	4.30035	2.28358	2.93368	3.08506	1.83306	1.34478	1.34443	1.10946	2.67204	1.2277	0.000183814	-0.886293	down
ENSMUSG00000003949	Hlf	702	477	831	626	357	975	1259	843	1522	847	3.14283	2.00407	3.96381	3.02279	1.62853	4.39299	5.75397	4.21537	7.06924	3.89699	2.13283e-05	0.912383	up
ENSMUSG00000042436	Mfap4	64	26	67	48	49	91	79	53	147	89	0.957989	0.350579	1.03177	0.745879	0.720212	1.32386	1.17783	0.856505	2.22658	1.33663	0.00884033	0.860612	up
ENSMUSG00000018126	Baiap2l2	114	132	66	117	80	180	181	76	149	256	1.36793	1.4839	0.826308	1.51368	0.96952	2.16896	2.21158	1.01272	1.85396	3.15397	0.0117124	0.755518	up
ENSMUSG00000063568	Jazf1	111	40	33	69	97	36	12	33	62	28	1.26493	0.431068	0.393636	0.843088	1.12943	0.41023	0.130785	0.410138	0.727411	0.320351	0.034281	-1.02432	down
ENSMUSG00000096054	Syne1	1277	1563	1045	1036	674	401	693	643	978	386	1.70619	1.5717	1.18257	1.34805	0.886814	0.362954	0.873418	1.15254	1.19019	0.379957	0.00271158	-0.791889	down
ENSMUSG00000007805	Twist2	98	60	53	73	71	45	32	14	66	14	1.83818	1.04897	1.02855	1.46855	1.33433	0.819931	0.576759	0.268924	1.26119	0.24285	0.0147154	-1.05019	down
ENSMUSG00000022853	Ehhadh	841	591	293	395	1327	502	338	229	496	245	7.13006	4.70641	2.61919	3.61564	11.4556	4.2574	2.90965	2.16543	4.35294	2.12402	0.0165869	-0.968147	down
NewGene_3924	NewGene_3924	69	54	52	31	22	68	92	78	57	135	2.53828	1.86063	2.03601	1.21326	0.816682	2.52129	3.46594	3.20571	2.16183	5.8579	0.0058077	0.998156	up
ENSMUSG00000017493	Igfbp4	5668	3198	2593	3665	4761	2455	2487	1586	3689	2648	37.4838	19.8222	18.0718	26.1041	31.9972	16.2223	16.6977	11.6855	25.2795	17.9307	0.0066729	-0.624645	down
ENSMUSG00000019970	Sgk1	13704	22092	8243	12888	13834	6942	12038	7908	12595	5633	139.616	212.53	88.9258	142.495	143.016	69.5063	126.047	90.1341	133.651	58.2344	0.0250004	-0.620016	down
ENSMUSG00000030317	Timp4	6567	5318	6014	6845	3547	2571	1174	1387	1582	1236	30.2469	22.9908	29.1746	34.0027	16.6277	11.8477	5.50429	7.13785	7.55834	5.83988	5.76194e-14	-1.75501	down
ENSMUSG00000045294	Insig1	1407	846	716	853	1130	499	604	469	651	557	13.1917	7.44599	7.07318	8.62822	10.7862	4.6788	5.75785	4.90693	6.32493	5.3519	7.11094e-05	-0.801957	down
ENSMUSG00000000320	Alox12	56	42	67	36	34	97	76	60	112	93	0.480563	0.336307	0.610464	0.323092	0.310395	0.83886	0.690221	0.557003	1.06695	0.946973	0.000673099	0.933214	up
ENSMUSG00000038264	Sema7a	1434	1380	1299	1507	515	514	567	456	1101	219	11.09	9.94997	10.4847	12.532	4.0108	3.93687	4.47933	3.89653	8.81465	1.7182	0.00175181	-1.0499	down
ENSMUSG00000032878	Ccdc85a	1260	1008	1045	1133	424	889	468	470	748	454	5.95192	4.58431	5.21189	5.79585	2.03624	4.19326	2.25673	2.48793	3.71889	2.16655	0.0190221	-0.607381	down
ENSMUSG00000022878	Adipoq	22698	902	1234	10316	15499	3773	743	278	3747	2022	444.511	16.5752	25.4411	217.895	308.86	73.9347	14.7868	6.07212	76.0161	40.5934	0.0140478	-2.28962	down
ENSMUSG00000023044	Csad	1610	193	178	800	1263	436	137	80	342	259	19.5789	2.21404	2.16326	10.4492	15.5003	4.97507	1.63742	1.00518	5.00371	2.9684	0.0142198	-1.70075	down
ENSMUSG00000045934	Mtmr11	252	250	235	249	147	308	345	235	398	707	2.28981	2.13707	2.24709	2.44621	1.35532	2.80143	3.18817	2.38234	3.74618	6.60252	0.000746806	0.84635	up
ENSMUSG00000024087	Cyp1b1	465	397	109	261	305	156	86	23	105	232	2.31159	1.83848	0.561348	1.38544	1.52979	0.773726	0.428949	0.124752	0.531893	1.1701	0.00404077	-1.34658	down
ENSMUSG00000040187	Arntl2	38	31	18	38	17	58	51	25	84	78	0.325476	0.24418	0.158457	0.354683	0.250467	0.498998	0.445382	0.23494	0.751504	0.691245	0.00360898	1.08803	up
ENSMUSG00000040183	Ankrd6	79	46	99	93	51	84	107	85	93	186	0.424281	0.228277	0.560347	0.538928	0.277733	0.451134	0.587229	0.508369	0.520117	1.0295	0.0451722	0.637254	up
NewGene_6680	NewGene_6680	25	32	68	17	40	49	92	67	64	55	0.548687	0.572778	1.79019	0.508192	0.886303	1.28189	2.21424	1.66651	1.27374	1.53047	0.044269	0.871115	up
ENSMUSG00000038400	Pmepa1	2441	594	1117	2115	1716	920	983	633	803	1291	13.6087	3.10464	6.57047	12.7174	9.73297	5.12788	5.64633	3.93725	4.6355	7.37784	0.0180077	-0.748432	down
ENSMUSG00000001750	Tcirg1	352	297	195	260	147	295	287	179	396	782	3.31092	2.61949	1.94198	2.63208	1.24556	2.45219	2.42203	1.65435	3.76924	6.67133	0.0390875	0.66486	up
ENSMUSG00000030630	Fah	738	212	130	289	574	224	73	66	146	227	11.7705	3.16201	2.18196	4.9716	9.31179	3.56987	1.18037	1.16925	2.40569	3.71408	0.00289176	-1.39887	down
ENSMUSG00000020889	Nr1d1	9100	10112	7590	7791	4031	4278	5793	3759	4789	5456	84.6195	88.2567	74.3296	78.144	38.1363	39.7984	54.7669	38.9887	46.1333	52.02	0.000911832	-0.614969	down
ENSMUSG00000025934	Gsta3	292	102	33	93	239	52	51	48	110	85	6.26279	1.76551	0.590548	2.06732	4.77118	0.894843	0.918553	1.39748	1.97073	1.50868	0.0210157	-1.14518	down
NewGene_9175	NewGene_9175	66	45	59	37	42	110	152	165	243	246	1.5533	1.00199	1.46252	0.934511	0.999625	2.60248	3.64883	4.3727	5.96458	5.97385	3.80673e-12	1.91303	up
NewGene_9791	NewGene_9791	102	122	134	137	173	187	199	183	107	432	2.94955	3.29897	4.07713	4.26827	5.10058	5.40237	5.84712	5.89218	3.20844	12.8345	0.0422312	0.739957	up
ENSMUSG00000018796	Acsl1	30804	17038	10401	17956	26032	15033	9224	7264	10803	5578	200.358	103.879	71.2194	125.91	172.116	97.6697	60.9802	52.8566	72.9597	37.1316	0.000713004	-1.05899	down
ENSMUSG00000071342	Lsmem1	834	730	1526	1338	851	1414	1931	1590	1683	1347	13.1603	11.0297	24.6357	22.7598	13.2396	20.8619	29.9082	27.8806	27.4692	20.7157	0.00667743	0.642814	up
ENSMUSG00000024713	Pcsk5	299	84	73	149	211	100	54	22	84	128	1.27751	0.343348	0.333706	0.689175	0.928629	0.437209	0.236674	0.103495	0.378409	0.564744	0.0207289	-1.07528	down
NewGene_7797	NewGene_7797	50	36	52	23	15	12	119	33	85	117	1.23998	0.651754	1.1335	0.479157	0.292713	0.220764	2.82027	1.04496	2.0362	2.32607	0.0487761	1.09054	up
ENSMUSG00000009394	Syn2	112	81	126	96	49	51	46	22	32	14	0.807718	0.537988	0.911506	0.787264	0.382647	0.409037	0.318302	0.157917	0.22133	0.087654	0.000338134	-1.41752	down
NewGene_2549	NewGene_2549	42	39	70	35	30	94	50	32	71	144	0.699151	0.613831	1.24066	0.642472	0.50375	1.59305	0.863504	0.601026	1.25281	2.50814	0.0346146	0.870914	up
ENSMUSG00000014444	Piezo1	1158	757	891	669	686	376	449	362	1096	341	3.5639	2.18732	2.88805	2.22077	2.14726	1.15731	1.40456	1.24028	3.49398	1.07556	0.0196006	-0.656335	down
ENSMUSG00000056133	Unc93a2	159	51	22	65	71	18	19	16	38	12	1.5147	0.448373	0.217436	0.66717	0.686254	0.16441	0.183556	0.167321	0.374532	0.114467	0.000400156	-1.78994	down
ENSMUSG00000057842	Zfp595	118	81	67	130	72	43	62	46	76	49	0.756791	0.483058	0.457978	0.885738	0.464632	0.265805	0.403365	0.324669	0.500372	0.316955	0.00895645	-0.714295	down
ENSMUSG00000049303	Syt12	255	106	58	163	269	84	38	44	54	2	1.79754	0.701395	0.430741	1.24076	1.92741	0.588974	0.266851	0.339868	0.395134	0.014491	0.00257206	-1.90243	down
ENSMUSG00000026991	Pkp4	1639	1411	1150	1599	1097	782	622	511	680	317	9.66095	7.78585	7.12795	10.0278	6.33208	4.3264	3.76871	3.31525	3.94273	1.77832	2.34214e-07	-1.18136	down
ENSMUSG00000038393	Txnip	79352	79685	53166	66226	52307	38770	49041	27728	57848	40320	717.118	675.179	505.29	645.089	481.194	349.048	449.778	279.093	540.618	373.771	0.000129067	-0.598807	down
ENSMUSG00000020108	Ddit4	1794	6498	538	1801	6941	528	453	297	1238	666	25.8547	87.9257	8.16831	27.9937	101.828	7.61143	6.62721	4.7624	18.4883	9.83941	0.000116851	-2.5713	down
ENSMUSG00000016319	Slc25a5	4155	2306	1990	2596	3466	2205	1409	1162	1932	2368	84.7633	44.1624	42.7559	57.1234	71.9579	45.0231	29.2252	26.435	40.8358	49.5416	0.00614957	-0.660839	down
ENSMUSG00000078794	Dact3	79	80	60	66	32	85	115	70	128	87	0.665361	0.628963	0.52693	0.60069	0.268077	0.717824	0.984874	0.656769	1.11429	0.747856	0.0110798	0.66816	up
ENSMUSG00000038793	Lefty1	58	36	55	64	17	61	74	54	126	70	0.901096	0.527267	0.898411	1.07394	0.269561	0.941198	1.17477	0.939474	2.0266	1.1113	0.0232347	0.793682	up
ENSMUSG00000025509	Pnpla2	35087	27213	11715	20787	39864	21042	10881	10822	13741	12048	397.145	289.563	135.09	246.244	475.344	255.63	112.874	142.049	168.461	119.077	0.00273494	-0.959289	down
ENSMUSG00000052837	Junb	762	856	1100	825	648	411	413	234	606	808	10.65	11.2301	16.1974	12.4328	9.21202	5.75141	5.8598	3.64919	8.77098	11.5806	0.00251331	-0.759712	down
ENSMUSG00000020027	Socs2	272	300	358	357	231	551	416	281	514	1035	2.94726	3.17727	4.05339	4.21704	2.70993	6.16441	4.73376	3.4609	5.87629	12.04	0.00126918	0.896847	up
ENSMUSG00000021998	Lcp1	421	227	212	258	221	273	213	154	442	1491	2.76835	1.39835	1.46558	1.83215	1.4813	1.79823	1.42571	1.13065	3.02165	10.0713	0.0477192	0.940456	up
ENSMUSG00000003418	St8sia6	221	214	184	164	75	116	87	54	160	86	0.731436	0.666352	0.640856	0.58401	0.25106	0.383349	0.292458	0.197955	0.549171	0.289501	0.0150197	-0.725686	down
ENSMUSG00000026072	Il1r1	741	688	594	462	362	255	331	203	456	584	3.2199	3.37961	3.27514	2.4624	1.60085	1.10894	1.46192	0.984468	2.47313	2.60029	0.0139373	-0.610589	down
ENSMUSG00000039942	Ptger4	176	165	235	90	72	366	181	121	290	313	1.3614	1.18946	1.89832	0.749033	0.553782	2.79085	1.40903	1.04258	2.30192	2.44618	0.0164468	0.824652	up
ENSMUSG00000071856	Mcc	754	614	575	653	312	286	257	233	476	224	2.44472	1.86207	1.95765	2.27031	1.02401	0.919016	0.840015	0.83436	1.58776	0.738738	2.8554e-05	-0.925002	down
ENSMUSG00000040675	Mthfd1l	48	47	72	27	18	69	105	80	132	166	0.324674	0.297466	0.520757	0.192509	0.124229	0.472823	0.729996	0.604762	0.936145	1.16642	0.000129932	1.42303	up
ENSMUSG00000054808	Actn4	2678	1922	2244	2381	1195	1140	1132	910	2493	768	18.729	12.5188	15.856	16.9361	8.07411	7.4611	7.53171	7.10277	17.2465	6.78923	0.0118795	-0.659055	down
NewGene_3650	NewGene_3650	36	55	38	53	39	74	66	31	156	65	0.646475	0.828567	0.626612	1.01774	1.28819	1.33102	2.17325	1.13627	2.79783	1.56561	0.0319562	0.807904	up
ENSMUSG00000031502	Col4a1	8446	6115	5096	5905	2703	3235	2623	1352	4179	2268	32.3332	22.6862	20.5269	24.4358	10.6119	12.3807	10.1992	5.76926	16.5587	8.89374	7.41971e-05	-0.999685	down
ENSMUSG00000022150	Dab2	772	537	598	572	423	644	793	384	1200	1755	4.45415	2.73469	3.54548	3.45648	2.67177	3.51132	4.51832	2.39718	7.00874	9.7631	0.0120141	0.726865	up
ENSMUSG00000025316	Banp	217	123	207	181	162	96	81	68	128	29	1.57663	0.689333	1.9628	1.89014	1.43754	0.803264	0.712893	0.599921	1.1795	0.327075	0.00111237	-1.11021	down
ENSMUSG00000039270	Megf9	481	335	257	349	172	220	236	136	267	51	1.53466	1.00363	0.863345	1.20064	0.558288	0.699876	0.763978	0.482795	0.880646	0.166272	0.0465885	-0.734208	down
ENSMUSG00000068740	Celsr2	436	107	118	273	124	138	123	72	130	70	1.26772	0.412607	0.515114	0.737688	0.300419	0.328117	0.336171	0.190417	0.357516	0.169677	0.0187929	-0.899532	down
ENSMUSG00000027883	Gpsm2	111	108	114	74	78	92	116	87	201	333	0.802601	0.727871	0.864288	0.571317	0.571475	0.660907	0.846997	0.701615	1.52844	2.46736	0.0272342	0.774916	up
ENSMUSG00000034161	Scx	86	61	105	97	39	126	212	134	91	111	2.09965	1.39373	2.67956	2.54006	0.94866	3.08172	5.26545	3.65211	2.28952	2.77042	0.00814379	0.889318	up
ENSMUSG00000020183	Cpm	721	735	736	733	260	380	352	215	555	174	3.51034	3.3579	3.77326	3.84563	1.28607	1.85014	1.74187	1.16457	2.79867	0.865436	0.0041055	-0.874363	down
ENSMUSG00000028427	Aqp7	2205	1064	1322	1785	1464	1171	616	454	1116	480	22.088	10.061	14.0034	19.3072	14.9168	11.7956	6.28342	5.14818	11.836	4.92379	0.000336729	-1.00006	down
NewGene_3410	NewGene_3410	35	43	17	38	26	69	52	60	45	34	0.529913	0.611954	0.269159	0.619583	0.394041	1.0355	0.801444	1.00762	0.702294	0.516848	0.0393217	0.791099	up
ENSMUSG00000024210	Ip6k3	1871	2130	2043	1957	1886	1271	1534	1110	1225	962	20.2048	21.5931	23.2383	22.804	20.7268	13.74	16.8439	13.3691	13.7001	10.651	0.000142459	-0.652432	down
NewGene_4052	NewGene_4052	144	191	108	77	158	106	56	60	75	102	2.1774	2.78965	1.53411	1.43727	2.95919	1.88551	0.995863	1.09237	1.15964	2.36995	0.0228965	-0.745694	down
ENSMUSG00000020963	Tshr	625	43	41	278	273	21	16	15	52	0	3.91141	0.231186	0.246435	1.86077	1.79674	0.11766	0.09305	0.092287	0.306745	0	0.000429862	-3.567	down
ENSMUSG00000021367	Edn1	215	280	130	237	103	83	80	81	202	105	2.5419	3.10199	1.61825	3.02204	1.2389	0.978769	0.961247	1.0573	2.4637	1.26864	0.0132257	-0.773909	down
ENSMUSG00000024164	C3	8601	4926	3160	4250	6914	1986	1982	1322	7165	3938	42.3691	22.7778	16.3917	22.5797	34.6612	9.78781	9.92308	7.26579	36.5656	19.8918	0.0277677	-0.811341	down
ENSMUSG00000036810	Cnep1r1	1681	1573	1813	1787	1649	2600	2455	2398	1832	3108	24.8571	21.5909	28.0881	28.4848	24.7071	38.3371	36.696	39.3315	27.826	47.0154	0.00123427	0.592795	up
ENSMUSG00000029177	Cenpa	92	73	75	56	59	80	106	65	80	282	1.62344	1.4517	1.59236	1.1456	1.35462	1.67856	2.37893	1.56039	1.42809	4.98085	0.0391763	0.810816	up
ENSMUSG00000049103	Ccr2	107	116	135	153	69	87	110	98	203	1069	0.771068	0.739095	0.762902	1.11921	0.503682	0.625244	0.802119	0.783359	1.11946	6.52189	0.0135963	1.42607	up
ENSMUSG00000026580	Selp	132	122	118	66	30	111	139	93	286	216	0.966905	0.837041	0.91044	0.517371	0.218188	0.814182	1.03942	0.760916	2.18019	1.62499	0.016752	0.889082	up
ENSMUSG00000033059	Pygb	1150	330	298	833	705	500	337	168	544	217	7.44012	2.00069	2.03122	5.814	4.63783	3.23616	2.21418	1.2078	3.64151	1.4364	0.0208485	-0.884687	down
NewGene_782	NewGene_782	131	157	172	150	164	226	264	209	141	340	1.81139	2.2358	2.12409	2.33037	2.13234	3.45832	4.05239	3.92836	2.25569	5.05	0.0180243	0.644443	up
ENSMUSG00000006542	Prkag3	1032	983	1524	1383	1043	1402	3234	2901	2361	1650	9.34223	8.26235	14.4306	13.4695	9.58679	14.1257	29.6123	29.2528	22.5984	15.1099	0.000178062	1.01737	up
ENSMUSG00000005893	Nr2c2	441	413	267	972	111	48	178	193	391	100	1.50381	1.31431	0.929906	3.46274	0.425558	0.155775	0.764357	0.712334	1.33899	0.338051	0.0180174	-1.20817	down
ENSMUSG00000044641	Pard6b	63	71	45	64	37	8	17	12	26	0	0.465055	0.493007	0.349945	0.508426	0.272809	0.055272	0.126896	0.092465	0.197221	0	0.000505083	-2.10674	down
ENSMUSG00000061780	Cfd	97205	6594	5493	41774	84166	12617	3337	1952	18149	5073	2734.3	174.049	162.609	1266.28	2409.21	354.435	95.9204	61.9742	528.8	147.056	0.00099503	-2.57448	down
NewGene_5203	NewGene_5203	140	98	170	159	146	162	240	216	227	214	1.78145	1.25341	2.55357	2.36801	2.09106	2.24962	3.50311	3.43058	3.18831	3.2689	0.00849509	0.609305	up
ENSMUSG00000018326	Ywhab	6888	2337	2626	4290	6736	2459	2097	1963	3183	2284	57.9562	18.4147	23.2197	38.856	57.6346	20.6605	17.9013	18.3911	27.8156	19.6599	0.00232376	-0.926892	down
ENSMUSG00000049225	Pdp1	3487	3327	3887	3882	1597	5295	6370	4978	6715	3849	21.805	19.1821	24.6525	25.8112	9.78258	31.9084	41.2242	36.9632	43.9307	23.7708	0.000112181	0.822244	up
ENSMUSG00000021287	Xrcc3	96	57	37	32	52	26	23	11	61	17	1.02134	0.572296	0.40187	0.376238	0.547729	0.263858	0.244183	0.125693	0.690444	0.171403	0.0363288	-0.990621	down
ENSMUSG00000021281	Tnfaip2	698	597	1015	755	247	714	1046	805	1500	830	4.70808	3.76647	7.18393	5.47485	1.68677	4.80039	7.26688	6.03059	10.4506	5.7177	0.0288296	0.619204	up
ENSMUSG00000021136	Smoc1	1323	79	141	986	589	312	121	77	329	72	9.70588	0.535711	1.07	7.73317	4.36248	2.25249	0.900218	0.620371	2.45954	0.533864	0.0232693	-1.7352	down
ENSMUSG00000019726	Lyst	308	145	225	200	131	67	83	89	199	180	0.590036	0.260655	0.453657	0.413037	0.255196	0.128509	0.161012	0.189296	0.394119	0.352549	0.0311707	-0.6759	down
ENSMUSG00000038296	Galnt18	458	395	426	371	198	207	218	148	348	75	4.57192	3.69996	4.48508	4.00192	2.01341	2.06159	2.21661	1.64371	3.60309	0.749598	0.00936982	-0.842192	down
ENSMUSG00000044405	Adig	1612	198	117	581	1713	297	139	109	325	205	65.2929	7.43794	4.92567	25.1509	70.7913	11.8894	5.65093	4.85336	13.5575	8.40401	0.00601862	-2.01602	down
ENSMUSG00000005514	Por	3418	1043	925	2038	3054	1219	790	671	1619	993	33.1619	9.45353	9.3478	21.2781	29.9496	11.7073	7.69921	7.18333	16.4228	9.76436	0.00511618	-0.991972	down
ENSMUSG00000008393	Carhsp1	1760	843	830	1400	1042	743	631	412	1081	770	15.5766	6.99762	7.73064	13.3639	9.38255	6.5751	5.67394	4.06401	9.91406	6.98196	0.00379189	-0.667966	down
NewGene_6476	NewGene_6476	144	144	200	134	231	257	266	215	239	383	1.10548	1.03242	1.61283	1.10485	1.80584	1.97186	2.07884	3.80899	1.8978	3.0143	0.013144	0.673053	up
ENSMUSG00000020085	Aifm2	1936	733	465	939	1714	775	418	406	827	288	18.3511	6.87326	4.67906	9.07053	16.3994	6.66494	4.12027	4.64074	8.1834	2.75725	0.00558826	-1.08323	down
ENSMUSG00000020089	Ppa1	2788	1477	1193	1827	2994	1490	1099	1194	1324	1264	51.7167	25.7143	23.3076	36.5416	56.4999	27.6432	20.7145	24.6938	25.4336	24.0309	0.015052	-0.669286	down
ENSMUSG00000030155	Clec2e	51	56	78	59	29	75	99	133	146	132	0.606661	0.629384	0.985661	0.765715	0.344863	0.901724	1.20148	1.78164	1.82105	1.62434	0.000130125	1.16131	up
ENSMUSG00000031824	6430548M08Rik	832	1088	947	667	752	371	359	398	598	664	3.83691	4.64062	4.59058	3.27088	3.49835	1.68421	1.6581	2.03592	2.82185	3.0928	6.85274e-05	-0.821618	down
ENSMUSG00000031827	Cotl1	218	138	152	153	167	236	197	94	281	1220	3.45038	2.04208	2.52726	2.61396	2.68162	3.73542	3.16543	1.64696	4.61388	19.8255	0.0108424	1.2703	up
ENSMUSG00000042684	Npl	94	77	61	103	53	127	100	49	95	274	1.36705	1.0445	0.922421	1.60984	0.772593	1.84421	1.46837	0.789884	1.43187	4.08926	0.0491741	0.761652	up
NewGene_9452	NewGene_9452	86	76	50	112	105	46	52	44	47	64	2.05198	1.70948	1.26835	2.89748	2.5634	1.08649	1.25587	1.17901	1.16103	1.5683	0.0191024	-0.737183	down
NewGene_9455	NewGene_9455	127	136	89	149	122	72	30	35	69	85	2.02764	2.09903	1.59239	2.57738	2.32092	1.37283	0.459037	0.583714	1.14914	1.48352	0.000562295	-1.08363	down
ENSMUSG00000027947	Il6ra	693	515	236	542	446	221	152	114	304	287	2.068	1.42108	0.743575	1.74411	1.32833	0.647676	0.451032	0.371056	0.927808	0.860945	5.35642e-05	-1.15663	down
ENSMUSG00000026473	Glul	28604	29696	11063	24201	50422	17553	9029	7360	14119	12616	259.398	252.71	105.758	237.011	465.188	159.335	83.312	74.5198	132.798	117.237	0.000310299	-1.27899	down
ENSMUSG00000007659	Bcl2l1	1470	1606	858	1457	888	686	453	336	753	521	14.7222	15.6126	9.08979	15.5767	9.05218	6.80692	4.54676	3.75559	8.07124	5.23596	8.47381e-08	-1.15387	down
ENSMUSG00000037709	Fam13a	6524	788	516	2517	4431	1893	618	297	837	750	28.5282	3.23145	2.37504	11.8716	19.7167	8.27975	2.74455	1.44496	3.78822	3.35981	0.0147643	-1.72662	down
ENSMUSG00000025213	Kazald1	128	129	201	198	72	276	240	281	159	206	2.32284	2.2129	3.29472	3.31839	1.23942	4.28941	3.79415	5.11115	2.74486	3.27671	0.0127326	0.774828	up
ENSMUSG00000023905	Tnfrsf12a	2006	2720	1130	961	1367	733	829	474	546	1865	51.7161	66.3654	30.6387	26.7186	35.792	18.8384	21.6677	13.5827	14.5227	50.5156	0.0173622	-0.852481	down
ENSMUSG00000020334	Slc22a4	388	147	104	133	215	88	70	56	172	126	4.33494	1.53569	1.22457	1.6024	2.4426	0.979886	0.789367	0.688087	1.98785	1.43638	0.0125945	-0.937056	down
ENSMUSG00000031980	Agt	632	349	349	403	354	341	196	186	397	137	8.4507	4.37923	4.9063	5.80318	4.81104	4.55858	2.65738	2.76971	5.48878	1.86795	0.014704	-0.688274	down
ENSMUSG00000074794	Arrdc3	3291	6579	1386	3251	7023	2853	2857	1407	2284	1950	20.2981	38.0957	9.00608	21.6224	44.0875	17.5288	17.9103	9.67916	14.5944	12.273	0.0136839	-0.944733	down
ENSMUSG00000029231	Pdgfra	1844	1967	1145	1383	700	653	826	493	1372	1131	7.18254	7.20647	4.62044	5.9133	2.63531	2.45424	3.35153	2.03764	5.66338	4.42134	0.0153165	-0.618715	down
ENSMUSG00000029238	Clock	994	1005	828	750	502	366	564	471	551	563	2.5796	2.44897	2.78568	2.09839	1.32535	0.948357	1.48954	1.36317	1.48199	1.49875	0.000411955	-0.63351	down
ENSMUSG00000021453	Gadd45g	4310	8592	1643	4824	9391	2223	2880	1753	5393	3434	101.823	190.522	40.8646	122.923	225.77	52.5455	69.1647	46.1992	131.974	83.1853	0.0188122	-0.937055	down
ENSMUSG00000032515	Csrnp1	202	226	166	114	172	129	142	73	117	94	1.73503	1.8458	1.52149	1.14449	1.52399	1.19985	1.23078	0.695233	1.14202	0.817296	0.0150877	-0.633929	down
NewGene_1060	NewGene_1060	42	47	85	56	90	15	22	42	39	31	0.71206	0.812528	1.66445	0.959314	1.73344	0.222965	0.432967	0.728742	0.871338	0.482655	0.0127758	-1.09268	down
ENSMUSG00000061086	Myl4	129	191	88	121	81	288	158	106	143	261	3.6169	4.92569	2.54776	3.58369	2.3159	7.98264	4.51482	3.22759	4.16223	7.18502	0.0297855	0.698891	up
ENSMUSG00000036661	Dennd3	251	250	273	215	112	152	127	56	202	31	1.19809	1.12015	1.36864	1.10429	0.543956	0.724625	0.616026	0.293323	0.998886	0.150516	0.0247842	-0.918609	down
ENSMUSG00000019761	Krt10	74	63	75	76	56	152	65	96	101	133	0.897832	0.704834	0.945192	1.66384	0.678174	1.83319	0.856585	1.30769	1.25507	1.6402	0.00983966	0.721436	up
ENSMUSG00000021200	Asb2	20819	26470	17608	17255	16203	11980	13005	12783	14566	7357	195.987	234.796	174.679	175.332	155.168	114.131	125.026	134.899	142.631	72.9254	0.0017979	-0.660145	down
ENSMUSG00000028789	Azin2	78	56	56	65	39	88	59	55	111	145	0.94847	0.644051	0.722456	0.8525	0.476688	1.07938	0.728893	0.742023	1.40099	1.81568	0.0233721	0.673998	up
ENSMUSG00000038210	Hoxa11	41	12	20	18	23	17	50	60	40	41	0.443796	0.120043	0.223809	0.211384	0.250539	0.186732	0.560841	0.73921	0.450446	0.455616	0.047509	0.953237	up
ENSMUSG00000024661	Fth1	65558	66860	68056	74644	124481	112429	122722	109087	70520	199424	1785.85	1709.62	1952.69	2193.13	3450.31	3064.52	3399.25	3315.37	1990.5	5570.14	0.0452021	0.618986	up
ENSMUSG00000024663	Rab3il1	270	307	287	310	137	321	351	173	504	858	2.4818	2.48316	3.24763	2.11617	1.05092	1.60857	3.3216	1.85717	4.48595	4.32367	0.0187825	0.768222	up
ENSMUSG00000024664	Fads3	941	371	455	838	341	300	316	169	658	327	6.49222	2.38966	3.2833	6.19886	2.37746	2.05739	2.2137	1.28998	4.67331	2.2947	0.0251375	-0.704351	down
ENSMUSG00000036304	Zdhhc23	192	416	102	93	196	130	79	34	100	25	0.956073	1.71649	0.470929	0.438339	0.874628	0.571138	0.350842	0.163261	0.451939	0.109752	0.00419012	-1.42416	down
ENSMUSG00000022840	Adcy5	707	226	141	420	269	183	115	58	228	104	2.54987	0.764414	0.534345	1.63391	0.987196	0.660547	0.419351	0.231916	0.852275	0.384428	0.00095762	-1.31459	down
ENSMUSG00000022847	Thpo	138	136	128	94	124	208	214	118	204	206	1.85867	1.97577	1.90481	1.26228	1.63307	3.35917	3.39312	1.92277	3.31196	2.62902	0.00259369	0.638443	up
ENSMUSG00000028996	Rbp7	444	291	338	265	696	73	41	38	100	141	18.125	11.1423	14.5284	11.6779	28.9172	2.97289	1.67629	1.69431	4.19379	5.89369	8.32674e-10	-2.42891	down
ENSMUSG00000046768	Rhoj	1533	1348	1242	1253	848	780	743	407	885	606	16.3834	13.5479	14.0133	14.5211	9.24973	8.38795	8.06431	4.81012	9.79516	6.67777	1.1228e-06	-0.822506	down
ENSMUSG00000047409	Ctdspl	1135	315	428	632	650	356	260	174	435	355	6.25558	1.62512	2.47975	3.75719	3.64211	1.96343	1.45605	1.06631	2.48135	2.00675	0.00145227	-0.97503	down
ENSMUSG00000056708	Ier5	1241	1397	1089	1158	977	679	700	424	818	916	9.58173	10.1216	8.85388	9.64229	7.67404	5.24022	5.49369	3.64675	6.53804	7.25028	6.83708e-06	-0.706152	down
ENSMUSG00000031209	Heph	447	59	71	284	122	88	47	24	96	33	2.4535	0.306264	0.41054	1.63395	0.666601	0.474382	0.250506	0.141415	0.535735	0.175053	0.00129271	-1.70348	down
ENSMUSG00000023505	Cdca3	39	46	57	35	26	51	55	73	58	319	0.694795	0.636192	0.766563	0.471974	0.327316	0.647487	0.707869	1.0507	0.839011	4.18164	0.00461208	1.4773	up
ENSMUSG00000012483	Rpa3	203	199	177	223	236	385	320	211	206	493	7.64596	7.04459	7.02689	9.06128	9.04823	14.5182	12.2858	8.85873	8.03277	19.0584	0.0158707	0.659721	up
ENSMUSG00000042607	Asb4	872	1077	596	820	478	317	485	303	576	278	6.7516	7.78277	4.82808	6.80992	3.74328	2.44211	3.79086	2.60016	4.59197	2.19276	8.65124e-05	-0.923684	down
ENSMUSG00000049929	Lpar4	84	67	72	38	41	27	36	15	53	40	0.500196	0.374261	0.451288	0.241624	0.247437	0.160831	0.215811	0.098939	0.322539	0.243951	0.0265083	-0.799942	down
NewGene_10149	NewGene_10149	80	57	46	35	46	30	18	27	39	5	2.86639	1.90797	1.74585	1.36344	1.67449	1.05869	0.651722	1.07867	1.46061	0.169752	0.0252815	-1.08702	down
NewGene_10330	NewGene_10330	104	141	131	114	115	197	179	169	164	457	2.40542	2.96974	3.05224	3.05078	2.72445	4.51312	4.2062	4.27049	3.90479	10.8174	0.00188564	0.966581	up
ENSMUSG00000100235	Gm28557	53	54	0	10	4	342	191	176	19	374	0.341591	0.327722	0	0.069121	0.024551	2.22255	1.26303	1.27434	0.12674	2.49339	0.00232961	3.3428	up
ENSMUSG00000048087	Gm4737	277	232	177	183	972	193	186	230	189	163	3.34382	2.63232	2.25098	2.37432	11.9494	2.33356	2.27894	3.09207	2.35487	2.01982	0.041947	-0.994806	down
ENSMUSG00000031016	Wee1	161	144	103	137	131	305	349	182	433	329	1.18571	0.996175	0.800347	1.08796	0.982983	2.2541	2.62014	1.49704	3.3153	2.4955	7.2302e-10	1.25684	up
ENSMUSG00000073293	Nudt10	46	28	37	30	16	35	90	54	51	208	0.646694	0.36598	0.55091	0.448771	0.229678	0.488227	1.29692	0.85452	0.739033	3.03957	0.00152074	1.53214	up
ENSMUSG00000040564	Apoc1	415	64	90	123	418	66	35	10	87	78	23.4362	3.19855	4.45967	7.61407	22.6508	3.48915	1.67986	0.489595	4.26864	4.61869	0.000422118	-2.07389	down
ENSMUSG00000046079	Lrrc8d	532	249	243	322	289	189	120	106	179	106	3.58405	1.50005	1.65563	2.2337	1.98727	1.21793	0.785126	0.755134	1.275	0.69643	6.09713e-06	-1.17039	down
ENSMUSG00000090659	Zfp493	82	57	92	76	50	167	84	91	116	157	0.849019	0.804332	0.830092	0.92066	0.455573	1.52793	0.750478	1.02927	1.12489	1.70639	0.00266748	0.835043	up
ENSMUSG00000008730	Hipk1	4828	4066	3235	4014	2643	2342	1921	1637	2641	1945	15.4644	12.305	10.9154	13.9616	8.70056	7.46786	6.25571	5.92993	8.87064	6.35539	4.21311e-09	-0.788025	down
ENSMUSG00000019278	Dpep1	2847	2808	1884	2152	2371	1266	1402	865	1936	2098	32.2862	29.8925	22.5217	26.3627	27.3576	14.3353	16.1299	11.0152	22.7344	24.3305	0.000735876	-0.666281	down
ENSMUSG00000039167	Adgrl4	3787	3209	2996	2862	1564	2314	1667	1246	2433	1430	23.4348	18.5838	19.4432	19.0239	9.84056	14.2683	10.4451	8.58184	15.6007	9.03277	0.002896	-0.606788	down
ENSMUSG00000026048	Ercc5	600	590	470	651	398	244	378	325	522	281	3.88539	3.58413	3.19946	4.54646	2.61989	1.57974	2.48281	2.34348	3.49951	1.86238	0.00353149	-0.585077	down
ENSMUSG00000022340	Sybu	146	103	215	197	51	64	33	17	116	0	1.14124	0.75023	1.76812	1.6575	0.40384	0.495259	0.259904	0.143333	1.00226	0	0.0269759	-1.61783	down
ENSMUSG00000034810	Scn7a	1364	625	488	1030	503	469	431	190	631	649	4.70078	2.02271	1.77115	3.82911	1.76232	1.61627	1.50771	0.729679	2.25052	2.29394	0.0170007	-0.718889	down
ENSMUSG00000046275	Trarg1	1865	125	203	1362	867	395	111	65	478	232	14.2866	0.89386	1.63212	11.2506	6.75482	3.02485	0.861756	0.549544	3.7945	1.81528	0.0198557	-1.77479	down
ENSMUSG00000042190	Cmklr1	967	351	236	706	201	192	159	81	378	261	8.47786	2.8907	2.18117	6.67628	1.78945	1.68059	1.41448	0.78583	3.43388	2.34769	0.00434004	-1.15133	down
ENSMUSG00000079043	Fastkd5	285	290	331	319	223	161	211	194	251	92	2.97282	2.28789	2.92923	2.89103	1.8955	1.67766	1.81994	1.80771	2.18966	0.982826	0.0181887	-0.616552	down
ENSMUSG00000031530	Dusp4	130	85	90	72	58	34	20	25	100	14	1.19512	0.733561	0.873603	0.71046	0.536702	0.311904	0.181264	0.253585	0.951575	0.125185	0.0134025	-1.16208	down
ENSMUSG00000038150	Ormdl3	4764	1348	1249	2739	3020	1691	1171	1125	1751	1025	55.1818	14.6534	15.2379	34.2257	35.5949	19.5982	13.791	14.5386	21.0054	12.1661	0.0049648	-0.910273	down
ENSMUSG00000028139	Riiad1	99	135	180	148	146	209	237	203	121	283	3.96613	5.05804	7.599	6.3715	5.93311	8.35946	9.64439	9.07437	5.0082	11.6539	0.039329	0.612936	up
ENSMUSG00000071369	Map3k5	404	191	372	292	308	225	137	112	275	113	1.87339	0.830968	1.81459	1.46002	1.45338	1.0409	0.645058	0.5788	1.32181	0.533331	0.00365407	-0.845181	down
ENSMUSG00000022965	Ifngr2	1073	784	1294	1206	958	1648	1555	1745	1546	1926	7.31639	5.01622	9.29715	8.88621	6.65207	11.25	10.7816	13.2845	10.9242	13.4742	8.50541e-05	0.716326	up
ENSMUSG00000029304	Spp1	186	147	163	129	22	393	161	46	350	2822	3.25709	2.39997	2.95192	2.4588	0.361586	6.90453	2.82145	0.853174	6.34635	51.1993	0.00594176	2.56586	up
ENSMUSG00000073802	Cdkn2b	88	52	54	48	39	84	101	58	99	133	1.59605	0.879454	1.02994	0.939715	0.705018	1.51443	1.85306	1.17291	1.85854	2.46606	0.0034273	0.804104	up
ENSMUSG00000024772	Ehd1	2039	1711	1888	2047	1272	1304	1101	1021	1540	697	15.3801	12.1155	15.0053	16.6597	9.76444	9.84539	8.44344	8.59301	12.0385	5.38938	0.00204198	-0.604899	down
ENSMUSG00000042529	Kcnj12	1049	1743	1165	979	1042	546	579	680	1012	414	11.553	17.2896	13.5317	11.6188	11.2879	5.61251	6.4318	8.37382	11.5219	4.68517	0.000683735	-0.853452	down
ENSMUSG00000032202	Rab27a	288	312	198	302	155	74	69	83	128	71	2.37923	2.45484	1.66549	2.76449	1.25235	0.588071	0.554396	0.733124	1.12085	0.57587	4.142e-10	-1.50523	down
ENSMUSG00000059493	Nhs	38	13	57	27	8	79	101	67	111	79	0.106593	0.032492	0.169634	0.08121	0.023394	0.225407	0.292864	0.212072	0.330155	0.229866	0.000147469	1.67978	up
ENSMUSG00000055866	Per2	532	377	467	399	388	664	860	540	1053	391	2.30739	1.53137	2.13115	1.86652	1.71176	2.88042	3.79198	2.61269	4.72792	1.7368	0.00194771	0.729152	up
ENSMUSG00000031093	Dock11	596	318	275	453	289	178	202	126	387	241	2.34383	1.17219	1.1346	1.85888	1.11505	0.67463	0.77634	0.571137	1.6009	0.937355	0.00424966	-0.743362	down
ENSMUSG00000025792	Slc25a10	1053	187	129	676	691	296	141	135	429	230	13.1672	2.19032	1.69189	9.11821	8.79052	3.69776	1.78968	1.8835	5.55063	2.94047	0.0166207	-1.14664	down
ENSMUSG00000020178	Adora2a	187	121	92	127	97	72	67	86	114	56	1.81879	1.11345	0.938145	1.32536	0.957919	0.695409	0.655873	0.93359	1.1505	0.549972	0.0287584	-0.594414	down
ENSMUSG00000055041	Commd5	206	88	136	46	176	235	300	179	219	197	5.0179	1.99608	3.4844	1.18445	4.3545	5.70838	7.42386	4.87218	5.53057	4.90799	0.0265855	0.818946	up
ENSMUSG00000071001	Hrct1	461	401	308	341	225	257	94	153	221	231	8.01868	6.54341	5.64733	6.39236	3.98009	4.47439	1.65688	2.9571	3.97816	4.11039	0.00206072	-0.802159	down
ENSMUSG00000031112	Stk26	228	171	325	289	264	277	474	338	546	296	1.58083	1.10985	2.37872	2.16558	1.86645	1.92565	3.34586	2.61997	3.92745	2.10677	0.0166044	0.613729	up
ENSMUSG00000039328	Rnf122	190	167	145	196	78	280	331	186	333	111	2.17054	1.70272	2.23053	2.6163	0.996096	3.88989	4.71188	2.78608	3.85091	1.25229	0.0167071	0.746434	up
ENSMUSG00000039321	Uts2r	15	17	58	12	11	57	37	57	91	13	0.213057	0.236049	0.893538	0.188144	0.151294	0.845768	0.553974	0.941758	1.3855	0.195929	0.0453743	1.21968	up
ENSMUSG00000029759	Pon3	1020	567	518	759	644	412	398	323	539	393	14.0197	7.13205	7.37528	11.264	8.80087	5.6721	5.55991	4.93051	7.92181	5.46469	7.69876e-05	-0.723116	down
ENSMUSG00000029752	Asns	533	81	118	243	496	175	91	50	184	91	6.72975	0.952041	1.55958	3.30916	6.37695	2.19109	1.15209	0.695005	2.40799	1.16002	0.00763968	-1.34012	down
ENSMUSG00000034898	Filip1	1144	1590	874	1013	856	466	652	591	1034	486	6.6783	8.62094	5.23668	6.27007	5.01473	2.56949	3.77598	3.82509	6.18221	2.82551	0.00157937	-0.727203	down
ENSMUSG00000032492	Pth1r	251	96	82	146	192	122	52	41	135	52	2.80432	0.987672	0.943	1.76878	2.2003	1.32959	0.573319	0.490764	1.5754	0.580704	0.0240419	-0.928011	down
NewGene_9214	NewGene_9214	21017	3272	1844	5472	21663	3903	1498	737	2983	3585	118.495	17.4681	10.8396	33.2732	126.009	21.8014	8.84135	4.59061	17.5747	22.7212	0.00319809	-2.11769	down
ENSMUSG00000042116	Vwa1	927	749	958	965	335	752	1423	943	1708	1117	6.46705	4.90717	7.04479	7.26797	2.38004	5.25371	10.1011	7.34087	12.355	7.99242	0.00922379	0.653284	up
ENSMUSG00000024052	Lpin2	244	284	203	188	216	136	158	78	164	188	1.09111	1.192	0.955938	0.904997	0.983543	0.609284	0.74287	0.38884	0.758874	0.863582	0.00455131	-0.634628	down
ENSMUSG00000026360	Rgs2	718	230	210	341	2606	572	153	139	297	326	6.2145	1.80448	1.8516	3.17488	22.6149	4.7954	1.30843	1.29389	2.69669	2.79295	0.0494649	-1.59402	down
ENSMUSG00000098188	Sowahc	1055	134	102	465	941	342	103	64	176	175	5.95265	0.706112	0.605573	2.82803	5.4055	1.92836	0.58697	0.402259	1.02512	1.00917	0.0210054	-1.65553	down
ENSMUSG00000053877	Srcap	82	71	42	141	71	59	200	364	72	315	0.562099	0.534392	0.466539	0.720857	0.867226	0.72412	1.15544	1.62326	0.695386	1.28617	0.00581579	1.42673	up
ENSMUSG00000063873	Slc24a3	408	94	196	280	219	163	125	88	138	62	2.64207	0.546282	1.2864	1.91352	1.39007	1.01474	0.791914	0.612849	0.893365	0.393251	0.00662737	-0.993073	down
ENSMUSG00000030161	Gabarapl1	6969	8453	4233	5582	7282	4329	3566	2464	4302	6631	97.0461	110.425	62.0284	83.7917	103.118	60.2202	50.4582	38.2952	61.96	94.521	0.0134976	-0.607742	down
ENSMUSG00000026834	Acvr1c	944	53	50	416	463	180	20	9	118	35	2.6048	0.136553	0.145184	1.23781	1.34148	0.495631	0.055725	0.025717	0.334857	0.097532	0.0125107	-2.38956	down
ENSMUSG00000031722	Hp	10730	530	913	3374	4736	1756	239	117	2348	433	201.848	9.34963	18.0728	68.4605	90.6534	33.0562	4.56896	2.44866	45.7512	8.34815	0.0277818	-2.06046	down
NewGene_2317	NewGene_2317	67	53	73	63	49	41	38	25	44	23	0.861016	0.638272	0.990079	0.876437	0.63746	0.52097	0.500214	0.350075	0.58248	0.296501	0.00786336	-0.794392	down
ENSMUSG00000020658	Efr3b	290	162	300	200	41	77	103	75	125	31	1.11884	0.584046	1.21958	0.831063	0.158073	0.296393	0.403693	0.322323	0.498581	0.122141	0.00874264	-1.17809	down
ENSMUSG00000050271	Prag1	394	250	356	284	201	179	134	139	286	140	2.08086	1.23783	1.983	1.62128	1.0811	0.946498	0.719114	0.819365	1.56462	0.75819	0.00199254	-0.716894	down
ENSMUSG00000018648	Dusp14	89	94	164	131	38	180	348	223	264	166	1.53817	1.67934	3.03955	2.50466	0.62095	3.13983	6.17635	4.34439	4.84045	2.72772	0.000228442	1.2702	up
NewGene_8591	NewGene_8591	64	47	54	49	55	85	98	54	85	111	0.740607	0.512119	0.658068	0.601288	0.643526	1.10714	1.22299	0.690602	1.01812	1.31711	0.00542268	0.712481	up
ENSMUSG00000031605	Klhl2	1418	593	463	1068	958	607	547	275	607	337	10.3751	4.11034	3.57499	8.46732	7.18006	4.2394	4.0768	2.27044	4.63552	2.55603	0.00335085	-0.890664	down
ENSMUSG00000034387	Ssu2	70	83	63	82	36	29	31	17	31	0	1.43046	1.62991	1.35688	1.82668	0.72654	0.618684	0.625055	0.356955	0.641555	0	0.0115743	-1.55948	down
NewGene_1711	NewGene_1711	53	98	63	102	77	52	38	26	86	36	1.02257	1.65389	1.2804	2.36375	1.60932	1.0318	0.687735	0.663315	1.8871	0.560833	0.0417012	-0.732413	down
ENSMUSG00000019082	Slc25a22	1233	914	481	664	913	719	391	323	569	396	12.1945	8.03279	4.7539	6.56203	8.8955	6.4772	4.33271	3.24885	5.31991	3.65981	0.0047959	-0.776922	down
ENSMUSG00000018846	Pank3	4367	1346	1373	2901	2371	1487	1073	800	1750	1254	14.9786	4.33371	4.95834	10.7341	8.27343	5.10402	3.74025	3.05968	6.21864	4.40966	0.00149025	-0.919448	down
ENSMUSG00000030711	Sult1a1	4200	4073	2116	3610	3010	2612	1337	1578	2264	1988	81.6329	74.6685	43.7651	75.7016	59.7783	50.5845	26.326	34.4061	45.6441	39.6884	0.000456165	-0.752682	down
ENSMUSG00000072949	Acot1	332	583	173	233	274	259	138	142	162	214	3.6842	6.08581	2.01425	2.78772	3.10202	2.87738	1.55868	1.76428	1.85563	2.43969	0.0208443	-0.754693	down
ENSMUSG00000052374	Actn2	12478	20246	9368	11847	12611	11953	8900	8238	7574	2858	104.78	159.582	82.8533	107.305	107.765	100.44	75.9815	77.1764	65.8901	24.6038	0.0389876	-0.685426	down
ENSMUSG00000059810	Rgs3	1361	841	741	1173	1156	812	555	481	1117	366	11.5521	6.1223	4.60799	10.8927	14.645	8.05748	4.5712	3.77942	7.93427	2.2482	0.0200095	-0.647306	down
ENSMUSG00000055254	Ntrk2	1605	260	247	919	575	357	173	105	513	255	6.04998	0.899486	0.95891	3.65122	2.14223	1.31217	0.648346	0.427368	1.96985	0.957635	0.00419027	-1.32767	down
NewGene_4494	NewGene_4494	44	51	50	57	46	37	162	99	108	108	0.385365	0.420782	0.463283	0.541704	0.413364	0.32365	1.53418	0.968387	0.984049	0.974091	0.00290091	1.08973	up
ENSMUSG00000024986	Hhex	97	54	180	122	50	299	157	161	238	141	1.35592	0.701312	2.65757	1.84654	0.705478	4.192	2.23882	2.51256	3.45763	2.01963	0.00413025	1.04786	up
NewGene_1923	NewGene_1923	181	109	316	230	154	233	299	441	556	305	2.27586	1.18418	4.44657	3.0129	2.26099	3.03432	3.53288	5.71102	6.71698	4.18841	0.00342657	0.934837	up
NewGene_631	NewGene_631	73	97	214	247	125	388	160	200	249	357	1.20567	1.5104	3.82889	4.43701	2.15517	6.44302	2.73408	3.723	4.36592	6.07559	0.0198854	0.867484	up
ENSMUSG00000037313	Tacc3	115	115	42	56	45	82	90	112	105	218	1.29679	1.21321	0.410714	0.522359	0.397479	0.713778	0.793956	1.39507	1.20101	2.55631	0.0405986	0.773034	up
ENSMUSG00000027875	Hmgcs2	1057	305	251	423	924	159	114	54	196	123	8.12381	2.19595	2.02597	3.50241	7.22521	1.21778	1.04816	0.500284	1.55642	0.965552	1.06705e-07	-2.21719	down
ENSMUSG00000012705	Retn	6236	320	302	3532	5374	732	296	156	935	516	179.769	8.66558	9.15985	109.978	157.247	21.1351	8.68322	4.96307	28.0069	15.2833	0.0021003	-2.62086	down
ENSMUSG00000028211	Trp53inp1	2405	2750	875	1547	1951	726	723	516	880	865	11.2569	12.0814	4.31024	7.80925	9.29341	3.40108	3.4384	2.69065	4.26441	4.15041	2.94116e-07	-1.33685	down
ENSMUSG00000027469	Tpx2	408	334	927	661	388	814	1522	541	604	765	2.36429	1.90397	5.97328	4.67393	2.28719	4.71664	8.96779	3.49555	3.798	4.54444	0.042061	0.688526	up
ENSMUSG00000027797	Dclk1	85	51	58	62	27	130	39	31	96	250	0.331231	0.175984	0.243794	0.265163	0.109466	0.513261	0.144084	0.123706	0.364217	1.03862	0.0479552	0.982083	up
ENSMUSG00000027792	Bche	1020	371	391	569	360	505	243	133	400	227	4.1558	1.41783	1.67725	2.49878	1.48889	2.05587	1.00453	0.604109	1.6859	0.947847	0.0207199	-0.786844	down
ENSMUSG00000002489	Tiam1	135	103	218	195	66	208	222	263	250	154	0.491887	0.339292	0.858508	0.881406	0.230976	0.775062	1.09827	1.41986	1.03951	0.546782	0.0270539	0.70078	up
ENSMUSG00000040283	Btnl9	974	632	471	673	671	494	262	177	630	251	4.6782	2.84427	2.37851	3.48199	3.27572	2.36754	1.27462	0.944732	3.12845	1.23093	0.00235512	-0.906544	down
ENSMUSG00000030087	Klf15	2767	3925	1945	3264	3324	2303	1908	1371	2068	1776	30.0176	41.8398	21.8868	38.4718	38.3458	24.6399	20.7465	16.8623	23.0348	19.5185	0.00166926	-0.671307	down
ENSMUSG00000030088	Aldh1l1	826	431	261	520	1050	412	245	276	457	215	6.72438	3.31825	1.66572	4.49943	6.47192	2.49831	1.50774	2.48431	3.86153	1.3349	0.010644	-0.952318	down
ENSMUSG00000022270	Retreg1	21602	33894	17622	19383	14975	14676	11206	8111	10282	24731	169.805	248.607	147.475	163.415	119.441	115.949	89.4835	70.9571	83.4782	200.329	0.0292559	-0.602256	down
NewGene_2056	NewGene_2056	10565	8796	8201	10373	5819	18114	14866	5885	16589	9954	85.7935	67.4821	70.2378	90.831	48.1887	147.84	122.686	53.2901	139.707	82.8548	0.00920212	0.619016	up
ENSMUSG00000004328	Hif3a	95	117	39	80	56	53	20	27	37	48	0.371101	0.430638	0.158849	0.340875	0.223671	0.208161	0.076776	0.118939	0.150514	0.193265	0.00846106	-1.01072	down
ENSMUSG00000036144	Meox2	803	640	870	630	298	1565	1120	785	2004	1060	8.60665	6.43826	9.82153	7.27491	3.24245	16.7858	12.2077	9.38417	22.2515	11.6492	2.94262e-05	1.05736	up
NewGene_1575	NewGene_1575	156	109	357	211	83	337	619	607	466	183	1.94466	1.42884	5.72737	3.27946	1.23346	4.97782	9.2341	9.79768	6.67315	1.91198	0.00100539	1.37188	up
NewGene_1574	NewGene_1574	150	246	153	116	115	176	268	230	260	200	1.69519	2.96358	1.89911	1.40353	1.44314	1.88801	3.47076	3.475	3.42781	2.61991	0.0193099	0.594266	up
ENSMUSG00000041361	Myzap	404	365	343	434	187	300	195	149	306	114	4.47477	3.79044	4.02454	5.17734	2.09985	3.3203	2.19494	1.84174	3.50436	1.28961	0.0226827	-0.645124	down
ENSMUSG00000021750	Fam107a	584	746	299	373	428	136	75	100	193	55	4.55012	5.52184	2.40936	3.23464	3.48886	1.02671	0.576398	0.877003	1.51636	0.42779	6.68374e-10	-2.08486	down
ENSMUSG00000071281	Zfp65	309	338	271	230	170	167	26	165	54	221	2.07768	2.15664	1.97768	1.6708	1.24572	1.06674	0.653896	1.2865	1.38135	1.44744	0.0406223	-0.95896	down
ENSMUSG00000033720	Sfxn5	202	112	68	167	112	96	67	63	127	50	1.79688	1.08737	0.761101	1.59197	2.11102	1.2451	0.727621	1.12021	1.46618	0.621254	0.0451167	-0.666122	down
ENSMUSG00000037406	Htra4	1158	949	1613	1373	822	1032	3098	1282	1787	2151	13.4327	10.3282	19.7077	17.179	9.70438	11.9832	36.5517	16.5928	21.4787	25.5894	0.0100613	0.701196	up
ENSMUSG00000023067	Cdkn1a	1489	2768	915	1803	1235	557	290	287	398	629	19.8266	34.4064	12.7429	25.7203	16.6242	7.37564	3.89373	4.24219	5.43703	8.52985	1.79558e-10	-1.88701	down
ENSMUSG00000023064	Sncg	1118	380	420	1061	260	352	299	215	651	134	33.1981	10.5877	13.1083	33.9748	7.84251	10.444	9.02707	7.12033	19.9989	4.06753	0.0271016	-0.905568	down
ENSMUSG00000034848	Ttc21b	113	76	83	156	71	147	134	74	145	245	0.636618	0.399536	0.493049	0.956266	0.407708	0.82971	0.767719	0.462276	0.858133	1.44317	0.0474794	0.610164	up
ENSMUSG00000066687	Zbtb16	1550	1735	1122	1060	1272	400	442	518	570	351	7.83212	8.2037	5.92585	5.69485	6.43601	1.97928	2.2227	2.85744	2.9987	1.77875	5.79763e-13	-1.51027	down
ENSMUSG00000055116	Arntl	486	799	303	396	350	219	162	150	129	274	4.63453	7.14188	3.1516	3.7677	3.09361	1.85512	1.3924	1.45237	1.28461	2.38502	2.05252e-05	-1.26481	down
ENSMUSG00000029650	Slc46a3	237	173	178	167	144	417	347	260	372	194	2.48758	1.74342	2.00525	1.92593	1.64982	4.59848	3.72122	3.14511	4.11844	2.27629	0.000138693	0.880507	up
ENSMUSG00000032135	Mcam	2981	1175	1299	2140	911	667	635	495	1469	634	25.8508	9.49577	11.7944	19.9146	7.98414	5.76761	5.56746	4.80608	13.0998	5.49908	0.000259336	-1.07718	down
ENSMUSG00000024778	Fas	711	721	486	664	511	336	338	256	370	400	12.2527	11.267	8.41611	11.8164	8.70108	5.79259	5.91365	4.8798	6.65501	6.37673	8.21001e-09	-0.822244	down
ENSMUSG00000042515	Pwwp3b	93	50	120	73	46	91	129	98	154	168	0.508174	0.257419	0.689569	0.431177	0.25319	0.495675	0.71944	0.596502	0.876501	0.942407	0.00765366	0.787586	up
ENSMUSG00000050188	Lsm10	228	227	219	212	342	364	291	241	335	725	6.10798	5.97105	6.17869	6.31479	9.32103	9.77338	7.91272	7.20437	9.30917	19.9285	0.0341584	0.65452	up
ENSMUSG00000062488	Ifit3b	99	50	91	86	32	135	99	96	247	130	1.2496	0.589873	1.19985	1.16416	0.40765	1.70635	1.26715	1.34405	3.23535	1.67831	0.00166372	1.02506	up
ENSMUSG00000033576	Apol6	2082	612	359	647	916	866	334	300	669	291	23.1836	6.64176	4.15366	9.7075	10.3578	9.54951	3.75167	3.80525	7.72767	3.25488	0.0420774	-0.848457	down
ENSMUSG00000021699	Pde4d	3852	3560	3212	3233	2591	1089	1847	1509	1949	878	27.1782	22.6385	21.8368	22.8473	18.2782	6.83036	12.7082	10.6858	13.1933	5.41223	2.50901e-07	-1.11942	down
NewGene_10100	NewGene_10100	954	182	158	345	1956	170	543	105	235	90	7.37225	1.31981	1.2815	2.87132	15.3788	1.30936	4.26438	0.905029	1.87411	0.705764	0.0356347	-1.73583	down
ENSMUSG00000020122	Egfr	1270	1203	793	984	516	427	415	262	810	566	3.33788	3.01148	2.17203	2.78262	1.44965	1.1659	1.08093	0.771492	2.28474	1.4371	0.000173583	-0.911726	down
ENSMUSG00000020120	Plek	114	92	94	66	73	120	99	59	114	454	0.700477	0.527563	0.604735	0.439568	0.454982	0.735075	0.619045	0.403469	0.723352	2.87088	0.0368247	0.949841	up
ENSMUSG00000027695	Pld1	352	345	268	305	206	164	132	174	274	127	1.86418	1.73617	1.46884	1.71237	1.08887	0.852199	0.72898	1.01127	1.71135	0.679018	0.00177114	-0.708745	down
ENSMUSG00000074217	Misp3	37	43	57	73	51	52	77	100	77	160	0.870809	0.897466	1.16836	1.67183	1.10156	1.15534	1.84961	2.50236	1.51019	3.28988	0.0181753	0.871	up
NewGene_5560	NewGene_5560	106	82	134	144	46	130	139	185	183	155	1.37957	0.997996	1.91441	2.05433	0.604938	1.74956	1.88811	2.81302	2.57868	2.12355	0.0147129	0.711913	up
ENSMUSG00000020009	Ifngr1	4202	3196	2180	3112	2896	1623	1389	1104	2622	1611	50.3384	36.1057	27.6177	40.4414	35.4882	19.5563	16.9312	14.9568	32.6616	19.8462	5.43231e-06	-0.881824	down
ENSMUSG00000039883	Lrrc17	114	92	77	100	22	100	136	48	221	222	1.33364	1.01251	0.944768	1.26654	0.256764	1.17421	1.61587	0.628022	2.68613	2.66463	0.0335496	0.878816	up
ENSMUSG00000039886	Tmem120a	1251	254	222	713	1413	479	253	217	448	349	20.2896	3.85742	3.78696	12.4692	23.3291	7.77228	4.17203	3.91194	7.52856	5.80562	0.0121485	-1.16385	down
ENSMUSG00000038594	Cep85l	6126	6398	5115	5402	6522	4004	3108	2293	3441	3157	20.8727	20.4622	18.3557	19.8561	22.6158	13.6538	10.7673	8.7149	12.1449	11.0309	3.88462e-07	-0.865055	down
ENSMUSG00000030278	Cidec	20447	1039	898	7652	23373	3150	757	384	2974	1228	307.512	14.5077	13.9403	122.825	351.871	48.4605	11.3381	6.36114	45.6445	18.5214	0.00389897	-2.72509	down
ENSMUSG00000024066	Xdh	2959	2376	1650	2378	1771	1621	1074	899	1787	913	16.2964	12.4737	9.55546	14.1017	9.91095	8.91993	6.00596	5.51474	10.1782	5.14485	0.000159852	-0.779353	down
ENSMUSG00000032315	Cyp1a1	207	400	87	259	269	162	125	147	150	47	1.99037	3.61947	0.876798	2.68656	2.63857	1.51973	1.21777	1.57343	1.45786	0.443947	0.0321422	-0.901625	down
ENSMUSG00000006800	Sulf2	1270	413	322	937	734	387	267	133	532	352	7.85147	2.14043	1.8707	5.69888	4.99049	2.13403	1.49881	0.815599	3.58354	1.9927	0.00184997	-1.12543	down
ENSMUSG00000039126	Prune2	50	76	51	38	23	97	44	31	123	166	0.099616	0.148738	0.107647	0.082322	0.045479	0.195374	0.090218	0.068904	0.256054	0.343902	0.0298517	0.965736	up
ENSMUSG00000026687	Aldh9a1	801	531	396	573	730	514	349	243	550	301	7.14391	4.44476	3.72127	5.51315	6.62834	4.58719	3.16032	2.4142	5.07967	2.74812	0.0172801	-0.621325	down
ENSMUSG00000062526	Mppe1	96	99	48	75	29	138	106	69	129	110	0.964396	0.942201	0.502372	0.817617	0.297933	1.39697	1.08725	0.778956	1.34982	1.13695	0.0192469	0.737579	up
ENSMUSG00000079017	Ifi27l2a	7895	467	690	4642	6911	554	675	212	2163	1327	431.424	23.9499	39.6673	273.617	384.325	30.2525	37.4661	12.9173	122.413	74.3504	0.00979003	-2.1394	down
NewGene_6284	NewGene_6284	501	445	597	568	656	873	1069	815	683	1256	8.80266	7.35081	11.0248	11.0099	11.8634	15.2486	19.2842	16.1099	12.5533	22.3672	0.000654864	0.787923	up
ENSMUSG00000018774	Cd68	243	185	107	121	176	273	141	90	399	2416	4.9823	3.56325	2.28907	2.69114	3.67229	5.60789	2.93236	2.06236	8.47801	50.9461	0.0150561	1.95897	up
ENSMUSG00000020218	Wif1	11	8	24	15	25	48	75	44	138	69	0.115151	0.079439	0.268975	0.17124	0.2711	0.523093	0.834994	0.530544	1.57369	0.775668	3.61006e-06	2.12501	up
ENSMUSG00000003228	Grk5	728	689	540	645	286	356	323	229	497	250	2.79913	2.48374	2.18663	2.67474	1.11694	1.36733	1.26258	0.980969	1.97775	0.985583	0.00111206	-0.748206	down
ENSMUSG00000039084	Chad	59	85	151	29	64	152	61	66	909	145	0.8871	1.19037	2.38557	0.460285	0.979963	2.28639	0.933447	1.09244	14.177	2.23497	0.00767668	1.67978	up
ENSMUSG00000028405	Aco1	1780	560	520	1008	1189	769	552	441	872	284	11.7506	3.46658	3.61375	7.17203	7.98517	5.07949	3.70438	3.24139	5.96251	1.91634	0.0327865	-0.758232	down
ENSMUSG00000032271	Nnmt	652	89	90	599	1191	118	77	53	174	142	16.297	2.0206	2.44065	15.8991	30.0644	2.84173	1.95432	1.41229	4.41982	3.52034	0.0017152	-2.30305	down
ENSMUSG00000041736	Tspo	2863	948	1015	1969	2489	1223	805	847	1455	1472	86.5545	26.8784	32.2994	64.2088	76.5604	36.985	24.7284	28.5524	45.5485	45.6209	0.0315594	-0.669533	down
ENSMUSG00000094686	Ccl21a	130	190	161	196	101	95	274	286	698	396	3.75875	5.1774	4.91349	6.11784	2.97748	2.75551	8.09324	9.25855	21.0087	11.7956	0.00190801	1.17501	up
ENSMUSG00000096596	Gm10591	95	131	86	143	71	122	125	191	385	120	2.73902	3.55999	2.62884	4.48515	2.09334	3.54006	3.68235	6.19916	11.6113	3.58019	0.0122035	0.872456	up
ENSMUSG00000037762	Slc16a9	287	326	147	255	175	150	152	95	203	147	1.9305	2.05842	1.04002	1.85218	1.19354	1.009	1.03479	0.71155	1.41003	1.01353	0.00731515	-0.634693	down
ENSMUSG00000025856	Pdgfa	549	454	641	496	284	557	686	561	893	956	8.03123	5.70306	9.32217	7.17542	3.97795	6.90422	9.51037	9.04244	12.8412	12.1054	0.00103635	0.63585	up
ENSMUSG00000038332	Sesn1	2709	5681	2023	3370	4888	2029	1401	1179	1895	2617	22.8514	49.7494	18.9963	32.445	44.9633	13.4856	9.55845	10.1911	17.0503	25.9545	0.000548704	-1.04649	down
ENSMUSG00000020432	Tcn2	1954	1049	855	1233	1811	978	641	514	1220	578	24.823	12.5696	11.3328	16.9374	23.6243	12.7005	8.44603	7.14767	16.3024	7.80236	0.00459328	-0.811471	down
ENSMUSG00000028642	Tmem269	50	43	36	51	28	58	87	86	74	202	0.837915	0.676889	0.63163	0.915062	0.464859	0.963062	1.47234	1.61094	1.28451	3.48029	0.000283845	1.33854	up
ENSMUSG00000028643	Svbp	277	315	254	283	288	467	384	328	356	615	9.50388	10.0482	8.93598	10.3251	10.1249	15.9415	13.4147	12.4087	12.8083	20.8869	0.00215762	0.630737	up
ENSMUSG00000032925	Itgbl1	239	304	222	244	177	371	323	173	544	527	1.48204	1.7712	1.45055	1.63619	1.12059	2.30975	2.04276	1.19793	3.50527	3.35889	0.00339196	0.715635	up
NewGene_1209	NewGene_1209	125	96	192	136	139	173	257	227	121	250	1.43627	0.954111	1.84433	1.49003	1.26366	1.70939	2.47801	2.37129	1.1361	2.29962	0.0398129	0.634175	up
ENSMUSG00000046668	Cxxc5	707	488	660	622	225	1056	1052	570	1085	916	7.89224	5.06509	7.96263	7.45572	2.57286	11.6581	11.8315	7.19874	12.6718	10.3132	0.000320993	0.856886	up
ENSMUSG00000001348	Acp5	2500	117	117	1116	1564	437	79	33	396	248	46.5796	2.01206	2.27258	22.3963	29.6614	8.14745	1.49493	0.679646	7.62538	4.44174	0.0173934	-2.1979	down
ENSMUSG00000066595	Flvcr1	1168	1346	735	1157	725	2065	1849	648	1203	2263	7.88476	8.50656	5.22594	8.89593	5.05751	13.1385	12.9469	4.94679	8.49614	15.3065	0.0152562	0.686095	up
ENSMUSG00000021932	Rnaseh2b	188	173	198	194	206	271	275	249	303	317	3.16923	2.82405	3.51589	3.53087	3.54252	4.57977	4.7307	4.75225	5.3078	5.49215	0.000451606	0.589729	up
ENSMUSG00000002550	Uck1	1636	394	431	946	1308	634	357	261	574	473	20.9317	4.75138	5.83412	12.9918	16.8991	8.00416	4.55673	3.70213	7.66972	6.11827	0.00629809	-1.02728	down
ENSMUSG00000039395	Mreg	901	922	1063	1077	813	1400	1657	1708	1225	870	9.9747	9.58507	12.4001	12.8666	9.15856	15.5114	18.6626	21.1	14.0584	9.88299	0.010851	0.599856	up
ENSMUSG00000020601	Trib2	926	767	1248	898	281	1225	1192	761	1464	1335	5.57696	4.33679	7.92169	5.83538	1.72223	7.38464	7.29988	5.17128	9.17397	8.24885	0.0289517	0.594866	up
ENSMUSG00000027559	Car3	125663	11316	20829	58626	92434	34164	26597	23942	38922	19570	1893.71	160.061	330.593	952.959	1417.5	515.191	407.503	402.536	607.649	302.414	0.0374891	-1.08187	down
ENSMUSG00000033174	Mgll	6170	2504	3042	4281	2697	2424	1493	999	2553	1298	40.9123	16.0772	21.8002	31.8738	18.8907	16.6894	10.1694	7.50292	17.4827	8.43624	8.00175e-05	-1.04364	down
ENSMUSG00000021474	Sfxn1	1789	247	194	720	1714	467	217	80	419	472	16.2629	2.10447	1.84872	7.0585	15.8522	4.24779	1.99822	0.803708	3.94472	4.39781	0.0310973	-1.53916	down
ENSMUSG00000037110	Ralgapa2	874	308	352	589	656	473	335	236	490	185	2.00339	0.661972	0.849777	1.48995	1.52995	1.08367	0.779071	0.601479	1.16526	0.434897	0.0450668	-0.66589	down
ENSMUSG00000047878	A4galt	208	171	139	191	76	65	77	58	146	107	2.6481	2.04734	1.76401	2.60198	0.927196	0.782339	0.990683	0.775188	1.82889	1.32261	0.00763621	-0.751184	down
ENSMUSG00000034255	Arhgap27	633	579	600	692	243	419	230	208	479	120	4.09729	3.52656	4.03523	4.78144	1.57153	2.68017	1.48483	1.479	3.32286	0.782429	0.0114749	-0.856051	down
ENSMUSG00000008845	Cd163	611	576	378	439	647	184	276	155	530	505	3.49206	3.0886	2.26614	2.70347	3.76813	1.04516	1.60125	0.982013	3.13608	2.95886	0.0222843	-0.718024	down
ENSMUSG00000059824	Dbp	3657	1907	5299	3827	1654	4165	6200	4201	7316	3699	51.3866	25.276	79.6643	57.709	23.7	59.5547	89.1493	66.339	107.445	52.2419	0.0132526	0.701358	up
ENSMUSG00000042429	Adora1	855	35	90	410	619	194	29	20	118	93	4.57834	0.160694	0.536964	2.31671	3.4194	1.04365	0.150444	0.11281	0.619572	0.483423	0.0129207	-2.15182	down
NewGene_2188	NewGene_2188	263	25	34	156	191	66	32	36	85	40	2.77729	0.217506	0.329418	1.57965	1.95374	0.601532	0.291684	0.362523	0.884882	0.357379	0.0175163	-1.35689	down
ENSMUSG00000040111	Gramd1b	592	351	179	273	453	238	171	153	208	104	3.31693	2.02886	0.742113	1.26993	1.72747	0.80352	0.739977	0.656185	0.979384	0.358907	0.00190602	-1.03753	down
ENSMUSG00000025408	Ddit3	422	346	483	306	161	605	547	355	524	462	12.1265	9.23043	14.5783	9.41474	4.63466	17.2034	15.7878	11.2881	15.4249	13.4468	0.010981	0.604384	up
ENSMUSG00000091712	Sec14l5	322	201	492	47	87	410	640	442	624	235	1.41537	0.830857	2.28169	0.539537	0.38996	1.80436	2.86503	2.17105	2.84866	1.05996	0.0216931	1.1112	up
ENSMUSG00000031849	Comp	36	127	130	55	56	246	108	117	937	54	0.372916	1.33174	1.42445	0.73159	0.59301	2.96983	1.23123	1.40567	10.3718	0.617395	0.00350888	1.7864	up
ENSMUSG00000039452	Snx22	59	53	111	66	28	85	114	80	160	119	0.578007	0.487644	1.16043	0.706817	0.28032	0.840698	1.14429	0.879195	1.6412	1.21114	0.00992283	0.853613	up
ENSMUSG00000026411	Tmem9	421	309	399	371	250	493	742	364	572	593	5.89379	4.05768	5.87857	5.61424	3.55703	6.89926	12.6865	5.7506	8.2916	8.51614	0.000101947	0.704855	up
ENSMUSG00000002900	Lamb1	2186	1455	946	1414	1145	787	725	363	1273	741	9.70912	5.97408	4.35803	6.66972	5.09424	3.44487	3.22402	1.7704	5.7722	3.32392	0.000542395	-0.857931	down
NewGene_6172	NewGene_6172	117	30	40	55	47	209	54	29	69	340	1.37295	0.365812	0.49057	0.691912	0.563251	2.46774	0.645367	0.381143	0.839631	4.11581	0.0232644	1.31664	up
ENSMUSG00000023960	Enpp5	1440	580	851	1051	791	582	666	418	841	432	12.5568	4.68661	7.32102	10.0618	7.64148	5.30248	6.04755	3.9806	7.46753	3.74961	0.00613909	-0.638361	down
ENSMUSG00000026922	Agpat2	1975	280	216	963	1633	763	279	203	407	155	33.6162	4.46321	3.88681	17.6448	28.256	12.9647	4.80312	3.86588	7.15076	2.69643	0.0354933	-1.46581	down
ENSMUSG00000022206	Npr3	560	368	179	441	195	222	156	107	361	92	2.213	1.30774	0.68903	1.85523	0.765569	0.90328	0.59115	0.447116	1.48937	0.344793	0.0210764	-0.847209	down
ENSMUSG00000035376	Hacd2	1807	220	203	702	1827	520	145	121	327	347	12.7007	1.4518	1.49917	5.31768	13.0681	3.658	1.0325	0.945849	2.37519	2.49581	0.0159581	-1.73208	down
NewGene_10407	NewGene_10407	174	105	130	104	302	53	29	37	64	52	1.14549	0.647212	0.898653	0.733656	2.01743	0.345324	0.188681	0.264543	0.436482	0.347708	4.72374e-06	-1.83214	down
ENSMUSG00000079469	Pigb	288	384	402	381	122	687	195	441	411	695	1.1055	1.33109	1.56546	1.55124	0.457224	2.54161	0.765682	1.81748	1.59044	2.63446	0.0477578	0.70121	up
ENSMUSG00000021226	Acot2	2220	2559	1243	1707	1107	1249	611	706	926	1862	25.5786	27.6667	15.0821	21.2024	12.977	14.3956	7.15357	9.07291	11.0471	21.9893	0.0204096	-0.671034	down
NewGene_8199	NewGene_8199	78	74	96	84	153	258	127	90	96	350	4.04369	3.6146	5.24311	4.69695	8.08577	13.4037	6.71847	5.21104	5.13795	18.6383	0.0353053	0.900923	up
ENSMUSG00000048355	Arxes1	345	12	13	258	775	104	15	10	78	57	5.51311	0.171486	0.212129	4.4493	12.622	1.65437	0.232971	0.177794	1.28134	0.923622	0.0196353	-2.53397	down
NewGene_3508	NewGene_3508	100	105	100	101	134	201	164	153	153	202	0.789103	1.04695	0.852325	0.824683	1.1172	2.31063	1.49337	1.57823	1.15832	1.59586	0.00260942	0.717764	up
ENSMUSG00000024524	Gnal	228	96	71	63	195	34	41	29	76	0	1.02761	0.395161	0.327726	0.298417	0.870501	0.149625	0.182497	0.142647	0.342865	0	0.00753674	-1.86385	down
NewGene_4277	NewGene_4277	129	78	183	224	48	181	255	227	153	310	1.3784	0.708703	2.75672	2.44941	0.604232	1.89636	3.08451	2.84412	1.86744	3.18003	0.0209298	0.858514	up
ENSMUSG00000037347	Chst7	119	72	109	115	52	141	114	106	237	152	1.36016	0.774767	1.31404	1.41311	0.601024	1.61765	1.32177	1.35167	2.81213	1.77883	0.00582206	0.72411	up
ENSMUSG00000037348	Paqr7	142	82	169	150	40	222	166	223	272	164	1.05053	0.544644	1.68168	1.44139	0.308113	1.58246	1.58788	2.29712	2.32134	1.19713	0.0046387	0.933057	up
ENSMUSG00000042628	Zfyve1	2132	3140	1711	2431	2328	1098	1449	1316	1590	2024	12.389	17.0088	10.9829	15.1771	14.2887	6.28623	8.97523	8.5912	9.64775	11.8793	0.00221126	-0.625427	down
ENSMUSG00000110104	Gm45717	32	51	6	30	26	62	14	32	34	613	1.6346	2.4181	0.299954	1.61471	1.32544	3.14246	0.678294	1.78741	1.75463	32.0848	0.00425422	2.3615	up
ENSMUSG00000042622	Maff	278	490	305	345	524	245	168	103	198	265	3.62554	6.00366	4.23394	4.86527	7.07801	3.31105	2.22819	1.5086	2.65537	3.51036	0.000804453	-1.00739	down
ENSMUSG00000028268	Gbp3	217	129	186	200	116	237	298	203	444	113	2.16293	1.14188	1.96176	2.05673	1.1059	2.22885	2.85372	2.13121	4.39786	1.08675	0.0345486	0.653929	up
ENSMUSG00000024892	Pcx	6139	2384	2092	2748	5995	2109	1989	1811	2672	1064	38.2217	13.6461	13.6725	18.4278	38.0217	13.1998	12.5801	12.5655	17.2634	6.65136	0.00438351	-0.990584	down
ENSMUSG00000048489	Depp1	4201	16748	830	5489	12803	1083	832	390	1485	3494	79.6201	298.176	16.563	112.228	247.024	20.5126	16.0369	8.21842	29.2747	67.8081	0.000707347	-2.54005	down
ENSMUSG00000003123	Lipe	11056	1898	1802	5746	8149	2500	1034	755	2583	868	89.4427	14.3233	14.7471	48.1818	65.2293	18.1747	7.87136	6.40559	21.707	7.0958	0.000907302	-1.88659	down
NewGene_1376	NewGene_1376	46	66	80	65	91	94	150	79	106	111	0.581694	0.823258	0.91102	1.00515	2.22284	1.28994	2.22286	1.32994	1.41758	1.6974	0.0403946	0.63515	up
ENSMUSG00000002985	Apoe	23615	4883	4097	9608	14658	4445	2835	2175	10356	6217	427.402	82.6663	77.9298	186.74	269.43	81.0424	52.2302	43.65	197.517	114.964	0.0358344	-1.14879	down
NewGene_5311	NewGene_5311	508	382	253	451	219	147	193	73	226	87	2.93358	2.07052	1.5411	2.81171	1.28564	0.846222	1.13035	0.470277	1.35308	0.5139	2.32895e-05	-1.27597	down
ENSMUSG00000011305	Plin5	1798	2417	1046	1335	1226	1373	712	808	964	689	22.8851	28.9006	14.0253	18.3294	15.8839	17.5011	9.19931	11.4806	12.7128	8.99011	0.00585576	-0.719535	down
ENSMUSG00000026510	Trp53bp2	514	510	464	498	494	281	320	253	464	262	2.97648	2.77242	2.83012	3.1109	2.9132	1.6267	1.8837	1.63245	2.78683	1.55871	0.00024049	-0.631133	down
NewGene_2747	NewGene_2747	39	62	66	38	57	52	86	114	60	151	0.723273	0.959216	1.10609	0.681633	0.850609	0.719515	1.31696	2.13612	0.977136	3.01043	0.02834	0.86225	up
ENSMUSG00000021215	Net1	5977	3019	2315	3464	4391	1943	1762	1506	3141	1761	39.2808	18.5195	15.9359	24.4157	29.2029	12.7081	11.7145	11.2458	21.3712	12.7871	0.000252977	-0.905157	down
ENSMUSG00000025574	Tk1	85	68	99	94	56	164	200	127	186	380	1.48932	1.10895	1.82476	1.7654	0.985582	2.88115	3.56219	2.48485	3.381	6.82911	9.17792e-07	1.42553	up
ENSMUSG00000035828	Pim3	4928	4051	3103	4388	4039	2780	2032	1270	2579	2282	51.3677	39.6362	34.0703	49.3352	42.8465	28.996	21.5341	14.7604	27.8481	24.3907	1.52244e-06	-0.884125	down
ENSMUSG00000038811	Gngt2	190	138	177	158	110	48	76	42	135	103	6.41917	4.9409	6.62736	5.85001	4.14248	1.19801	2.60783	1.90031	5.18868	4.34093	0.00120421	-0.9249	down
ENSMUSG00000020057	Dram1	1209	172	181	640	800	345	112	85	363	172	10.8895	1.45043	1.71563	6.36249	7.32673	3.10419	1.02441	0.84712	3.51939	1.58154	0.00376748	-1.47852	down
ENSMUSG00000022364	Tbc1d31	165	141	73	90	134	42	65	48	99	51	1.50061	1.0732	0.584076	0.754499	1.1813	0.31557	0.604061	0.440167	0.858574	0.501078	0.00248862	-0.968497	down
ENSMUSG00000044167	Foxo1	1861	1651	977	1863	1605	701	663	446	973	582	5.43234	4.52429	3.00453	5.86542	4.7691	2.04824	1.96653	1.45008	2.9417	1.74118	4.52181e-09	-1.22415	down
ENSMUSG00000027075	Slc43a1	3529	5388	2283	4035	5543	2784	2560	1485	2420	4077	29.5002	42.2199	20.122	36.9553	47.5621	23.2322	21.6073	13.7978	21.2828	34.473	0.0241156	-0.653751	down
ENSMUSG00000093962	Gm11756	34	19	22	38	28	31	62	66	44	45	0.643073	0.327556	0.440088	0.771501	0.548503	0.589927	1.21031	1.39927	0.865955	0.888806	0.0224674	0.888246	up
ENSMUSG00000002831	Plin4	14769	9982	6285	11020	9439	4529	3123	3304	6275	4063	58.8474	37.332	26.3764	47.3622	38.272	18.0581	12.6482	14.6878	25.9012	16.6	3.38545e-09	-1.23942	down
ENSMUSG00000036208	Nepro	234	174	129	135	194	41	76	78	173	157	2.06304	1.43736	1.19184	1.26886	1.7407	0.358048	0.986998	0.757635	1.58221	1.41787	0.0392422	-0.728201	down
ENSMUSG00000034110	Kctd7	130	108	130	78	56	154	175	125	221	94	0.763885	0.59116	0.805845	0.494282	0.330348	0.907199	1.0445	0.817961	1.34439	0.565763	0.0180807	0.672395	up
ENSMUSG00000027309	4930402H24Rik	718	242	340	362	383	230	167	114	296	144	2.79248	1.0262	1.36561	1.48707	1.59381	0.877295	0.646771	0.550522	1.19331	0.560391	0.00028487	-1.07256	down
ENSMUSG00000018983	E2f2	37	37	56	27	21	63	95	65	103	29	0.196492	0.185088	0.314277	0.154036	0.111852	0.335528	0.510445	0.384972	0.565265	0.157388	0.00972838	1.0498	up
NewGene_6359	NewGene_6359	230	277	197	235	114	150	123	93	170	75	1.62341	1.83279	1.46188	1.79253	0.819892	1.06024	0.877772	0.732905	1.24471	0.542223	0.00659371	-0.727174	down
ENSMUSG00000021319	Sfrp4	46	38	36	30	14	43	116	22	218	55	0.524303	0.322662	0.529166	0.351965	0.194522	0.268599	1.64018	0.147899	2.4395	0.349494	0.00509738	1.46458	up
ENSMUSG00000027513	Pck1	24524	1197	973	9581	28842	6658	696	188	1599	1143	233.188	10.6793	9.74153	98.2636	279.077	63.3504	6.72695	1.98714	15.7434	11.1439	0.0147464	-2.69304	down
ENSMUSG00000022464	Slc38a4	4805	5923	5360	3561	5173	1911	2973	2540	3008	3486	30.9188	35.7788	36.328	24.712	33.868	12.3301	19.4496	18.2335	20.0456	23.002	5.8439e-05	-0.81227	down
ENSMUSG00000022469	Rapgef3	803	657	617	862	382	381	319	337	742	253	5.59306	4.63538	4.79539	6.45026	2.58156	2.40777	2.16706	2.36806	5.61967	1.63403	0.0110661	-0.663084	down
ENSMUSG00000028347	Tmeff1	432	24	33	202	290	84	17	20	41	50	4.68462	0.230574	0.347243	2.37078	3.28728	0.864149	0.176134	0.319225	0.445141	0.525177	0.00113808	-2.18448	down
ENSMUSG00000028341	Nr4a3	197	102	2429	183	598	73	13	23	39	88	0.868153	0.421171	11.3132	0.869437	2.68819	0.321835	0.055138	0.110944	0.177472	0.39527	1.59134e-05	-3.91842	down
ENSMUSG00000032024	Clmp	351	286	168	189	176	73	124	81	250	132	2.13724	1.63398	1.07501	1.2364	1.08803	0.439749	0.762665	0.546786	1.57711	0.823396	0.00887138	-0.809175	down
ENSMUSG00000024990	Rbp4	1068	107	252	592	790	203	116	48	244	98	28.4622	2.50654	7.11524	17.2834	21.7989	5.11671	3.20081	1.43889	6.8911	2.15902	9.43835e-05	-1.99873	down
ENSMUSG00000115423	AL731706.1	105	164	98	28	117	190	61	279	174	1406	2.79866	4.10803	2.75053	0.796449	3.17967	5.09317	1.64575	8.31538	4.82793	38.6214	0.0108893	2.02884	up
NewGene_8885	NewGene_8885	82	65	67	72	45	84	84	70	111	198	2.66196	1.96174	2.2876	2.5257	1.46636	2.70858	2.78068	2.53907	3.73729	6.59552	0.0110996	0.759588	up
ENSMUSG00000021904	Sema3g	921	1076	996	834	282	291	455	357	905	187	5.13	5.62703	5.84618	5.00826	1.59378	1.61956	2.57789	2.21936	5.22277	1.06867	0.0204702	-0.857291	down
ENSMUSG00000021903	Galnt15	3707	4886	2459	3516	2134	1986	1734	1322	3039	2366	14.8236	18.6378	10.3571	15.1662	8.68219	7.94564	7.0492	5.8956	12.5906	9.70185	0.00214417	-0.645273	down
ENSMUSG00000002504	Slc9a3r2	2934	2316	4267	3223	1680	1748	1253	1241	2258	1101	35.8922	28.6106	60.1338	44.2633	22.3419	22.3861	16.4606	17.2529	31.4492	15.9837	0.000223988	-0.876993	down
ENSMUSG00000038526	Car14	1467	2422	1328	1322	1148	1165	777	954	1034	779	22.231	35.0026	21.4233	21.9945	17.8876	18.1574	12.1617	16.6925	16.334	11.8528	0.00412934	-0.645615	down
ENSMUSG00000027994	Mcub	38	68	40	35	48	108	39	28	98	278	0.73631	1.21079	0.799355	0.744829	0.928861	2.07013	0.757499	0.589008	2.0171	5.78063	0.0191244	1.23505	up
ENSMUSG00000034520	Gjc1	478	444	432	379	152	309	181	158	380	127	6.23654	5.06215	5.76567	5.00368	1.69346	3.37257	2.41423	1.92968	5.2153	1.41429	0.0428414	-0.647768	down
ENSMUSG00000070423	Olfr558	236	320	299	230	93	155	88	102	237	50	1.95785	2.49689	2.61922	2.05809	0.780488	1.28299	0.74369	0.943645	2.03532	0.42632	0.0286957	-0.847695	down
ENSMUSG00000064105	Cnnm2	225	107	107	142	207	108	87	58	97	20	1.38515	0.510033	0.651046	0.837844	1.17924	0.549995	0.50744	0.328955	0.510046	0.099595	0.0121287	-1.06228	down
ENSMUSG00000026380	Tfcp2l1	552	495	302	504	658	277	287	385	393	223	1.505	1.26625	0.867563	1.48306	1.82688	0.754295	0.79568	1.17052	1.10938	0.623221	0.0204755	-0.646594	down
ENSMUSG00000026384	Ptpn4	1775	1823	852	1136	775	706	530	418	831	783	4.12951	3.99038	2.08909	2.85009	1.83476	1.64298	1.25265	1.08404	1.99943	1.86671	8.80465e-05	-0.911491	down
ENSMUSG00000056947	Mab21l1	138	112	115	125	72	147	164	133	167	205	1.39285	1.05892	1.22754	1.35899	0.734904	1.48957	1.68829	1.5012	1.74795	2.12594	0.0014419	0.593472	up
NewGene_2175	NewGene_2175	191	145	230	244	69	349	235	213	217	246	1.7631	1.25815	2.24022	2.43721	0.643374	3.23106	2.20908	2.19393	2.08168	2.33379	0.0406076	0.605957	up
ENSMUSG00000040146	Rgl3	79	43	55	68	84	50	35	14	36	53	0.586978	0.300651	0.434074	0.551252	0.636305	0.371162	0.255557	0.110266	0.276415	0.403589	0.0362894	-0.809507	down
ENSMUSG00000020262	Adarb1	767	678	806	625	410	438	292	276	604	364	2.93794	2.43892	3.25384	2.57136	1.58122	1.68269	1.14007	1.16636	2.40962	1.41622	0.000659674	-0.698471	down
ENSMUSG00000039956	Mrap	975	45	50	475	879	254	56	30	131	28	23.6903	0.985083	1.30595	12.5156	21.9333	6.186	1.42511	0.821699	3.28104	0.595847	0.0164347	-2.28677	down
ENSMUSG00000020846	Rflnb	1350	1211	1406	1085	608	626	501	307	813	426	9.72322	8.18795	10.6636	8.42962	4.45622	4.512	3.66446	2.46285	6.06107	3.14072	6.31844e-06	-1.04298	down
ENSMUSG00000020848	Doc2b	287	333	66	155	313	113	38	70	87	144	1.65979	1.81105	0.397575	0.969276	1.84309	0.655292	0.221718	0.452389	0.519811	0.850948	0.00272075	-1.34389	down
ENSMUSG00000026858	Miga2	908	402	322	650	808	443	168	158	324	227	6.42971	2.66102	2.55566	5.22223	6.2827	3.31662	1.20442	1.30766	2.35701	1.6405	0.000500429	-1.21243	down
ENSMUSG00000046318	Ccbe1	107	93	114	89	57	135	174	79	214	115	0.411131	0.333035	0.458678	0.368547	0.222639	0.516664	0.677334	0.33868	0.849834	0.45307	0.0109138	0.67127	up
ENSMUSG00000040435	Ppp1r15a	5131	8618	3832	4036	3488	1945	2482	2195	2652	4584	55.5909	87.5227	43.4384	47.1643	38.4313	21.034	27.2979	26.5374	29.7489	50.78	0.00220452	-0.816056	down
ENSMUSG00000026463	Atp2b4	1035	806	677	984	338	498	463	288	828	395	2.23795	1.65379	1.61292	2.29211	0.741356	1.07359	1.01252	0.691601	1.84885	0.873677	0.0259671	-0.587049	down
NewGene_5624	NewGene_5624	214	195	347	343	378	362	597	479	279	609	3.60574	2.98305	6.58363	5.84481	8.56064	6.08421	9.4243	9.85983	5.76878	10.2032	0.0320525	0.682517	up
ENSMUSG00000068417	Pnp2	104	62	28	66	78	33	31	2	23	42	1.91432	1.06934	0.536661	1.30239	1.46252	0.592798	0.575227	0.039916	0.426456	0.791579	0.0137891	-1.36862	down
ENSMUSG00000074476	Spc24	48	48	48	50	38	64	87	93	60	79	0.817888	0.734312	0.886182	0.950252	0.726365	1.18145	1.59029	1.88451	1.11961	1.497	0.00549199	0.795507	up
ENSMUSG00000048546	Tob2	7148	6728	6223	5365	4242	3273	3683	2081	4688	4567	43.6018	38.487	39.9519	35.2675	26.3126	19.9582	22.8504	14.1837	29.6026	28.5432	3.96637e-05	-0.672811	down
ENSMUSG00000034903	Cobll1	709	514	469	559	329	399	320	190	423	140	3.56978	2.51049	2.50895	3.02511	1.67653	1.99863	1.64863	1.0586	2.25786	0.719085	0.00721551	-0.754131	down
ENSMUSG00000009471	Myod1	314	291	714	266	67	893	972	492	912	862	4.25902	3.70736	10.2192	3.89306	0.913891	12.1471	13.4225	7.45982	12.8389	12.0119	0.000574528	1.38279	up
ENSMUSG00000022180	Slc7a8	583	521	462	515	1129	221	326	275	434	187	3.61087	3.02608	3.00994	3.44019	7.11168	1.36947	2.0514	1.89759	2.78176	1.18545	0.000454434	-1.18055	down
ENSMUSG00000002588	Pon1	471	73	139	238	228	19	74	36	188	87	7.87237	1.13549	2.43293	4.32792	3.87221	0.315727	1.24278	0.654024	3.25441	1.48108	0.00381151	-1.52126	down
NewGene_611	NewGene_611	57	57	38	40	45	106	83	74	62	95	0.820032	0.751244	0.504291	0.541723	0.5881	1.46812	1.13557	1.16723	0.851449	1.2428	0.00211626	0.881286	up
ENSMUSG00000022094	Slc39a14	690	1136	457	573	1128	243	323	242	382	370	3.57153	5.59155	2.51632	3.23677	6.03181	1.24562	1.68163	1.37784	2.03424	1.94783	4.08005e-06	-1.36662	down
ENSMUSG00000022096	Hr	1875	1972	1833	1429	1425	331	870	877	904	456	8.84655	8.76767	9.00695	7.23556	6.88321	1.49226	3.98896	4.6442	4.44462	2.10567	9.20371e-06	-1.24891	down
ENSMUSG00000035615	Frmpd1	44	59	66	75	73	150	91	78	87	108	0.208431	0.265539	0.331532	0.389343	0.35523	0.720792	0.445781	0.41812	0.433298	0.530407	0.0191812	0.720603	up
ENSMUSG00000025019	Lcor	83	90	56	60	44	27	36	40	65	20	0.399733	0.40999	0.284624	0.314443	0.218243	0.116553	0.166096	0.220202	0.319577	0.10372	0.0344295	-0.770015	down
ENSMUSG00000072964	Bhlhb9	533	172	150	275	540	174	142	111	212	88	4.80184	1.44275	1.40942	2.652	4.94179	1.56123	1.2907	1.10218	1.98316	0.807947	0.00278874	-1.20111	down
ENSMUSG00000037921	Ddx60	89	44	47	37	30	67	57	69	127	61	0.342966	0.159514	0.189762	0.150347	0.114629	0.256256	0.226582	0.295384	0.505487	0.239067	0.0436586	0.686112	up
ENSMUSG00000037926	Ssh2	3158	3458	2462	2641	1679	2052	231	199	400	1315	9.10582	9.09231	7.14874	8.15747	5.2338	5.65995	1.40888	1.24659	2.34007	3.71688	0.0106456	-1.62407	down
ENSMUSG00000018417	Myo1b	1540	1062	1282	1194	580	650	736	535	1076	424	7.73276	5.06115	6.9383	6.55066	2.9989	3.2538	3.87335	3.18521	5.81219	2.17597	0.00567072	-0.666601	down
ENSMUSG00000026657	Frmd4a	301	324	258	249	111	190	50	140	144	134	1.12499	1.35609	1.01595	1.00237	0.422344	0.710215	0.29082	0.582962	0.862169	0.512577	0.0161143	-0.828605	down
ENSMUSG00000036339	Tmem260	132	78	101	102	125	324	179	91	361	259	0.819956	0.459506	0.933026	0.743023	0.684774	1.7702	1.20172	0.630072	1.9949	1.89112	0.000296791	1.16068	up
ENSMUSG00000028967	Errfi1	2537	3667	1905	1934	3019	1353	1738	944	1718	1984	21.1007	28.6109	16.688	17.3366	25.5321	11.2511	14.7002	8.74995	14.7991	16.9152	0.00144421	-0.756478	down
ENSMUSG00000044734	Serpinb1a	92	109	132	91	81	152	91	128	278	314	1.21085	1.34635	1.82333	1.2937	1.0821	2.00497	1.20971	1.88246	3.79409	4.24318	0.00356848	0.933869	up
ENSMUSG00000047414	Flrt2	45	245	203	189	86	256	283	153	409	342	0.353066	0.844717	0.758384	0.726049	0.310883	0.910775	1.04278	0.606238	1.53518	1.24866	0.0199755	0.914236	up
ENSMUSG00000054484	Tmem62	285	146	199	183	256	83	175	130	148	119	2.54264	1.3688	2.05263	1.86447	2.46686	0.712922	1.54068	1.29339	1.32581	1.04987	0.0168367	-0.67323	down
ENSMUSG00000018169	Mfng	1158	260	381	829	454	341	205	192	707	268	15.7105	3.308	5.4362	12.1268	6.26175	4.62797	2.82045	2.89339	9.92663	3.72279	0.0340625	-0.818788	down
ENSMUSG00000021823	Vcl	1979	1934	1736	1283	2347	537	799	685	1572	1678	11.1158	10.602	10.7559	8.3602	13.355	2.94479	5.10879	4.65532	10.1695	8.26325	0.00426973	-0.845	down
ENSMUSG00000002265	Peg3	1949	1345	763	1178	924	525	600	221	630	1154	5.48591	3.55455	2.26066	3.57631	2.64528	1.47777	1.71499	0.693832	1.83604	3.33084	0.00276765	-0.951051	down
ENSMUSG00000002266	Zim1	316	253	142	217	129	97	133	41	110	220	1.0365	0.779553	0.490823	0.768164	0.430687	0.318658	0.442046	0.150425	0.373108	0.73999	0.0281879	-0.777551	down
ENSMUSG00000030671	Pde3b	4374	228	205	1776	4080	1087	192	59	475	433	16.8373	0.821165	0.827345	7.37211	15.9802	4.18381	0.749217	0.250958	1.89289	1.70566	0.0180095	-2.27424	down
