# Supplementary material for: Multi-omics-guided discovery: yeast protein alleviates glucocorticoid-induced muscle atrophy through dual activation of IGF-1/PI3K/Akt/FOXO and CaMKK/AMPK signaling pathways
Source: Royal Society of Chemistry journal article supplement (doi:10.1039/d5fo04912a), 2026-01-01
Supplement: d5fo04912a3.xlsx [file d5fo04912a3.xlsx]

## Sheet: Normal_vs_Model.diff.annotation
Supplementary Table 3: Normal_vs_Model.diff.annotation
#ID	name	A1	A2	A3	A4	A5	B1	B2	B3	B4	B5	A_Mean	B_Mean	Fold_change	log2FC	Pvalue	VIP	regulated	KEGG_annotation	KEGG_pathway_annotation	LM_ID(lipidmaps)	CATEGORY(lipidmaps)	MAIN_CLASS(lipidmaps)	SUB_CLASS	HMDB_ID	CAS	kingdom(HMDB)	super_class(HMDB)	HMDB_taxonomy	sub_class(HMDB)
neg_1118	3''-Oxoribostamycin	12.8521	97.973	5.32354	154.112	66.7043	63.4235	275.771	193.539	255.627	175.049	67.393	192.682	2.85908	1.51555	0.029326	1.54	up	C21176	Neomycin, kanamycin and gentamicin biosynthesis(ko00524)	--	--	--	--	--	--	--	--	--	--
neg_1268	Taurocholate	2942.1	6649.95	6653.75	7596.75	5637.6	1584.61	776.682	419.126	1708.47	1031.47	5896.03	1104.07	0.187257	-2.41691	0.00272488	1.91947	down	C05122	Primary bile acid biosynthesis(ko00120);;Taurine and hypotaurine metabolism(ko00430);;Metabolic pathways(ko01100);;Bile secretion(ko04976);;Cholesterol metabolism(ko04979)	LMST05040001	Sterol Lipids [ST]	Steroid conjugates [ST05]	Taurine conjugates [ST0504]	HMDB0000036	81-24-3	Organic compounds	Lipids and lipid-like molecules	Steroids and steroid derivatives	Bile acids, alcohols and derivatives
neg_1286	C01056	1.31504	11.2878	9.81723e-08	3.89639	0.934845	4.83752	93.9644	122.965	200.11	103.194	3.48681	105.014	30.1175	4.91253	0.0312142	1.636	up	--	--	--	--	--	--	--	--	--	--	--	--
neg_1360	Bilirubin	347.176	195.322	96.7702	82.3954	159.236	315.222	470.675	584.757	352.097	438.91	176.18	432.332	2.45392	1.29509	0.00508437	1.73061	up	C00486	Porphyrin metabolism(ko00860);;Metabolic pathways(ko01100);;Bile secretion(ko04976)	--	--	--	--	HMDB0000054	635-65-4	Organic compounds	Organoheterocyclic compounds	Tetrapyrroles and derivatives	Bilirubins
neg_14	Fructose-lysine	358.474	349.578	389.066	298.431	292.429	181.662	199.458	211.891	368.437	219.739	337.596	236.237	0.699764	-0.515059	0.0373456	1.51803	down	--	--	--	--	--	--	--	--	--	--	--	--
neg_1460	Acoric acid	641.58	900.319	256.884	1261.78	732.036	552.769	2382.3	1697.5	2432.2	1588.49	758.519	1730.65	2.28162	1.19006	0.0439977	1.48745	up	--	--	--	--	--	--	HMDB0038165	5956-06-09	Organic compounds	Lipids and lipid-like molecules	Prenol lipids	Monoterpenoids
neg_1462	(Z)-5-[(2R,3S,4S)-4-Hydroxy-2-[(E)-3-hydroxyoct-1-enyl]oxan-3-yl]pent-3-enoic acid	863.682	658.847	248.237	1230.86	690.553	589.536	6459.91	5521.75	3318.58	3486.72	738.435	3875.3	5.24799	2.39177	0.0357127	1.61318	up	--	--	--	--	--	--	HMDB0244345	--	Organic compounds	Organic acids and derivatives	Hydroxy acids and derivatives	Medium-chain hydroxy acids and derivatives
neg_1463	10-Deacetyl-2-debenzoylbaccatin III	85.2457	63.2922	19.9161	107.767	65.622	56.1403	669.011	528.045	384.085	335.925	68.3686	394.641	5.77226	2.52914	0.0329023	1.63045	up	C11899	Metabolic pathways(ko01100)	--	--	--	--	--	--	--	--	--	--
neg_1464	Decitabine	20.2157	9.27385	9.81723e-08	29.0386	13.8457	21.8348	223.215	154.583	78.1606	98.8881	14.4748	115.336	7.9681	2.99424	0.0416817	1.57656	up	--	--	--	--	--	--	HMDB0015391	2353-33-5	Organic compounds	Organoheterocyclic compounds	Triazines	Triazinones
neg_1486	Dhesn	4.88057	9.81723e-08	9.81723e-08	52.0251	3.98404	20.3989	38.9898	97.4253	58.648	46.6747	12.1779	52.4273	4.30511	2.10605	0.0403836	1.46958	up	--	--	--	--	--	--	--	--	--	--	--	--
neg_1488	Penitrem B	189.534	136.116	168.585	509.442	237.56	419.959	586.418	2050.71	1134.61	975.477	248.247	1033.43	4.16292	2.0576	0.049392	1.51342	up	C20731	--	--	--	--	--	HMDB0256239	--	Organic compounds	Organoheterocyclic compounds	Naphthopyrans	--
neg_1495	milbemycin alpha10	29.149	11.7123	13.6946	103.134	31.8541	51.0755	77.9558	189.13	124.251	121.072	37.9087	112.697	2.97284	1.57184	0.0349762	1.50852	up	--	--	--	--	--	--	HMDB0254722	--	Organic compounds	Phenylpropanoids and polyketides	Macrolides and analogues	Milbemycins
neg_1497	Cyanoketone	422.853	432.912	369.767	442.837	402.754	692.008	720.494	646.756	731.008	665.83	414.224	691.219	1.66871	0.738731	1.25868e-06	2.12424	up	--	--	--	--	--	--	HMDB0250613	--	Organic compounds	Lipids and lipid-like molecules	Steroids and steroid derivatives	Androstane steroids
neg_1498	(3beta,5alpha,6beta,7alpha,22E,24R)-Ergosta-8,22-diene-3,5,6,7-tetrol	91.9557	117.021	136.06	73.7581	106.272	248.923	159.752	245.694	276.885	222.379	105.013	230.726	2.19712	1.13561	0.00126978	1.9147	up	--	--	--	--	--	--	HMDB0032107	200942-15-0	Organic compounds	Lipids and lipid-like molecules	Steroids and steroid derivatives	Ergostane steroids
neg_1506	Tetradecanedioic acid	98.3732	156.96	120.628	203.194	145.854	282.607	171.353	249.678	292.986	250.515	145.002	249.428	1.72017	0.782548	0.00584826	1.75755	up	--	--	LMFA01170018	Fatty Acyls [FA]	Fatty Acids and Conjugates [FA01]	Dicarboxylic acids [FA0117]	HMDB0000872	821-38-5	Organic compounds	Lipids and lipid-like molecules	Fatty Acyls	Fatty acids and conjugates
neg_1508	Hymenoxon	92.631	216.459	129.154	379.378	209.152	549.346	312.641	436.197	444.588	431.1	205.355	434.774	2.11718	1.08215	0.00688395	1.75826	up	C09482	--	--	--	--	--	HMDB0253305	--	Organic compounds	Organoheterocyclic compounds	Oxanes	--
neg_1514	Caprylic acid	13.8232	17.1697	8.76902	23.1879	15.4957	40.7718	29.4455	30.2681	28.2984	27.2366	15.6891	31.2041	1.9889	0.991972	0.00181099	1.86163	up	C06423	Fatty acid biosynthesis(ko00061);;Lipoic acid metabolism(ko00785);;Metabolic pathways(ko01100);;Biosynthesis of cofactors(ko01240)	LMFA01010008	Fatty Acyls [FA]	Fatty Acids and Conjugates [FA01]	Straight chain fatty acids [FA0101]	HMDB0000482	124-07-2	Organic compounds	Lipids and lipid-like molecules	Fatty Acyls	Fatty acids and conjugates
neg_1515	LysoPC(P-16:0/0:0)	2.71927	0.721741	1.47144	9.81723e-08	2.48047	0.0686132	55.1389	221.701	180.091	133.706	1.47859	118.141	79.9013	6.32015	0.0448025	1.55756	up	--	--	--	--	--	--	HMDB0010407	--	Organic compounds	Lipids and lipid-like molecules	Glycerophospholipids	Glycerophosphocholines
neg_1525	3-Oxotetradecanoic acid	16.7787	22.9534	6.20908	46.4244	20.8903	36.7737	31.7751	59.9619	88.1322	55.3361	22.6512	54.3958	2.40145	1.26391	0.0330945	1.51062	up	--	--	--	--	--	--	HMDB0010730	--	Organic compounds	Lipids and lipid-like molecules	Fatty Acyls	Fatty acids and conjugates
neg_1545	Pikromycin	54.9472	47.9427	31.8333	63.486	40.8343	43.158	38.1059	16.0655	24.5517	26.9306	47.8087	29.7623	0.62253	-0.683785	0.0394613	1.40641	down	C11999	Metabolic pathways(ko01100)	LMPK04000038	Polyketides [PK]	Macrolides and lactone polyketides [PK04]	-	--	--	--	--	--	--
neg_1571	Pentolame	5524.09	5398.31	5616.02	5417.01	5117.61	8312.55	8620.48	8429.24	9504.46	8583.26	5414.61	8690	1.60492	0.682499	2.04262e-05	2.12246	up	--	--	--	--	--	--	HMDB0256289	--	Organic compounds	Lipids and lipid-like molecules	Steroids and steroid derivatives	Hydroxysteroids
neg_1574	Piriprost	406.955	373.967	397.195	371.397	361.633	598.228	631.758	634.896	577.635	594.533	382.23	607.41	1.58912	0.668231	4.56779e-07	2.13108	up	--	--	--	--	--	--	HMDB0256603	--	Organic compounds	Organoheterocyclic compounds	Pyrroles	Substituted pyrroles
neg_1576	Pravastatin	3843.03	3650.77	4941.52	5562.22	3947.21	3758.01	863.314	3802.19	2744.17	2842.72	4388.95	2802.08	0.63844	-0.647378	0.0436235	1.40334	down	C01844	Bile secretion(ko04976)	LMFA05000695	Fatty Acyls [FA]	Fatty alcohols [FA05]	-	HMDB0005022	81093-37-0	Organic compounds	Organic acids and derivatives	Hydroxy acids and derivatives	Medium-chain hydroxy acids and derivatives
neg_1581	Pregnenolone-3,21-disulfate	601.628	505.952	701.814	696.353	630.375	460.309	81.0636	537.311	146.839	260.259	627.225	297.156	0.473764	-1.07776	0.0162329	1.6791	down	--	--	--	--	--	--	HMDB0242133	--	Organic compounds	Lipids and lipid-like molecules	Steroids and steroid derivatives	Sulfated steroids
neg_1609	Undecylprodigiosin	11.013	19.0927	5.22388	9.03425	6.28517	27.6419	29.4755	17.83	23.8426	20.6998	10.1298	23.898	2.35917	1.23828	0.00305636	1.79278	up	C12023	Metabolic pathways(ko01100)	--	--	--	--	--	--	--	--	--	--
neg_1612	3-[(3aS,4S,7aS)-7a-Methyl-1,5-dioxo-octahydro-1H-inden-4-yl]propanoate	57.9716	51.6519	62.3999	70.6143	54.2779	56.5081	46.1155	52.8502	45.2229	47.9643	59.3831	49.7322	0.83748	-0.255873	0.0462452	1.38864	down	C20199	Metabolic pathways(ko01100)	--	--	--	--	--	--	--	--	--	--
neg_1613	5-((6-((Aminomethyl)amino)-1-oxohexyl)amino)pentanoic acid	511.319	1038.94	750.408	1495.97	888.879	2100.71	1181.23	2097.84	2097.47	1864.82	937.104	1868.42	1.99382	0.995535	0.00495729	1.77608	up	--	--	--	--	--	--	HMDB0258266	--	Organic compounds	Lipids and lipid-like molecules	Fatty Acyls	Fatty amides
neg_1616	2,3-Dimethoxy-5-methyl-6-(9'-carboxynonyl)-1,4-benzoquinone	20.1787	45.9729	34.829	77.8422	43.9111	96.3225	55.9164	92.1538	151.552	97.9275	44.5468	98.7745	2.21732	1.14882	0.0206583	1.60071	up	--	--	--	--	--	--	--	--	--	--	--	--
neg_1618	Propofol glucuronide	27.7529	49.0259	41.08	73.5614	46.9208	107.589	61.0363	106.324	96.2032	91.7417	47.6682	92.5789	1.94215	0.957656	0.00413691	1.79729	up	--	--	--	--	--	--	HMDB0060933	--	Organic compounds	Organic oxygen compounds	Organooxygen compounds	Carbohydrates and carbohydrate conjugates
neg_1629	geranate	9.81723e-08	2.11608	9.81723e-08	23.5123	4.58919	26.82	26.975	44.4647	35.1486	29.0688	6.04351	32.4954	5.37691	2.42678	0.00176906	1.89816	up	C16461	--	--	--	--	--	HMDB0304369	--	Organic compounds	Lipids and lipid-like molecules	Prenol lipids	Monoterpenoids
neg_1649	PE(14:1(9Z)/22:5(4Z,7Z,10Z,13Z,16Z))	15.3766	49.2446	19.0559	70.2007	31.7608	101.215	35.3654	98.6532	64.1992	75.6414	37.1277	75.0149	2.02046	1.01468	0.0443904	1.44024	up	--	--	--	--	--	--	HMDB0008878	--	Organic compounds	Lipids and lipid-like molecules	Glycerophospholipids	Glycerophosphoethanolamines
neg_1650	LysoPE(0:0/18:3(6Z,9Z,12Z))	1769.67	1569.03	1436.18	1417.72	1430.09	745.125	777.794	970.694	860.885	799.371	1524.54	830.774	0.544935	-0.875844	7.17431e-05	2.08221	down	--	--	--	--	--	--	HMDB0011478	--	Organic compounds	Lipids and lipid-like molecules	Glycerophospholipids	Glycerophosphoethanolamines
neg_1662	LysoPC(18:3(6Z,9Z,12Z)/0:0)	689.184	748.064	512.384	1037.33	711.771	518.014	354.398	345.766	316.765	344.666	739.746	375.922	0.508177	-0.976598	0.0092969	1.72602	down	--	--	--	--	--	--	HMDB0010387	--	Organic compounds	Lipids and lipid-like molecules	Glycerophospholipids	Glycerophosphocholines
neg_1665	N-Palmitoyl Arginine	5937.96	5497.21	6906.23	7028.71	6241.71	5922	4360.22	3814.23	3868.12	4019.51	6322.36	4396.82	0.695439	-0.524004	0.00504421	1.76232	down	--	--	--	--	--	--	HMDB0241920	--	Organic compounds	Lipids and lipid-like molecules	Steroids and steroid derivatives	Androstane steroids
neg_1668	Trypanothione disulfide	45.4232	31.7563	56.3475	41.2034	47.5715	23.2435	31.432	23.4002	16.0138	16.522	44.4604	22.1223	0.497573	-1.00702	0.00249423	1.85941	down	C03170	Glutathione metabolism(ko00480);;Metabolic pathways(ko01100)	--	--	--	--	HMDB0060521	--	Organic compounds	Organic acids and derivatives	Carboxylic acids and derivatives	Amino acids, peptides, and analogues
neg_1670	LysoPE(0:0/16:1(9Z))	998.187	940.263	670.896	763.576	838.068	660.592	597.626	508.162	294.426	491.481	842.198	510.457	0.606101	-0.722369	0.00474006	1.76234	down	--	--	--	--	--	--	HMDB0011474	--	Organic compounds	Lipids and lipid-like molecules	Glycerophospholipids	Glycerophosphoethanolamines
neg_1675	2'''-N-Acetyl-6'''-deamino-6'''-hydroxyneomycin C	144.824	127.365	131.028	129.387	133.094	90.8679	83.6492	97.2909	76.4992	80.8681	133.14	85.8351	0.644699	-0.633302	1.20055e-05	2.09614	down	C17587	Neomycin, kanamycin and gentamicin biosynthesis(ko00524)	--	--	--	--	--	--	--	--	--	--
neg_1680	Methyl octynecarboxylate	1.79949	3.82669	1.72962	34.3385	7.63296	61.2749	48.7122	94.3524	82.0858	63.4988	9.86546	69.9848	7.09392	2.82658	0.0004672	1.97443	up	--	--	LMFA07010964	Fatty Acyls [FA]	Fatty esters [FA07]	Short fatty esters [FA0710]	HMDB0031273	111-80-8	Organic compounds	Lipids and lipid-like molecules	Fatty Acyls	Fatty acid esters
neg_1682	C12272	120.842	129.784	100.671	85.6834	107.947	87.298	83.205	43.1166	78.0011	69.7838	108.986	72.2809	0.663216	-0.59245	0.0102935	1.69079	down	--	--	--	--	--	--	--	--	--	--	--	--
neg_1683	Bardoxolone methyl	612.725	537.919	420.196	828.566	582.178	337.051	269.807	272.745	213.119	230.555	596.317	264.655	0.443817	-1.17196	0.00568147	1.83192	down	--	--	--	--	--	--	--	--	--	--	--	--
neg_1684	5b-Cyprinol sulfate	63.1782	46.1806	47.5433	72.4525	54.4778	18.911	23.2286	19.979	10.5877	16.4182	56.7665	17.8249	0.314004	-1.67114	0.000558305	2.0027	down	--	--	--	--	--	--	HMDB0006888	--	Organic compounds	Lipids and lipid-like molecules	Steroids and steroid derivatives	Bile acids, alcohols and derivatives
neg_1693	24,25-Diacetylvulgaroside	612.695	518.705	378.265	540.322	510.159	523.335	442.749	232.845	218.527	287.785	512.029	341.048	0.666072	-0.58625	0.0492557	1.40924	down	--	--	--	--	--	--	HMDB0041366	172616-87-4	Organic compounds	Lipids and lipid-like molecules	Prenol lipids	Sesterterpenoids
neg_1765	20-Hydroxyecdysone	3432.64	3517.05	3064.25	3292.18	3055.23	2317.77	3123.53	2923.63	2479.88	2527.46	3272.27	2674.46	0.817309	-0.291047	0.012569	1.65379	down	C02633	Insect hormone biosynthesis(ko00981)	LMST01010209	Sterol Lipids [ST]	Sterols [ST01]	Cholesterol and derivatives [ST0101]	HMDB0030180	5289-74-7	Organic compounds	Lipids and lipid-like molecules	Steroids and steroid derivatives	Bile acids, alcohols and derivatives
neg_1774	PE(15:0/20:3(8Z,11Z,14Z)-2OH(5,6))	12.315	29.9191	22.0967	45.9519	25.8586	67.6044	30.2682	64.4913	69.1528	65.1193	27.2283	59.3272	2.17888	1.12359	0.00901428	1.71701	up	--	--	--	--	--	--	HMDB0260820	--	--	--	--	--
neg_1799	Phytolaccatoxin	146.32	122.969	86.7611	156.826	131.479	93.7459	79.8029	63.2999	65.4618	67.4025	128.871	73.9426	0.573772	-0.80145	0.00689562	1.772	down	--	--	--	--	--	--	HMDB0303401	--	Organic compounds	Lipids and lipid-like molecules	Prenol lipids	Triterpenoids
neg_1810	Decanoylcholine	27.6155	21.3683	28.0797	46.9513	36.3891	65.2245	45.0073	54.663	43.0196	64.4663	32.0808	54.4762	1.69809	0.763916	0.00831777	1.72411	up	--	--	LMFA07010826	Fatty Acyls [FA]	Fatty esters [FA07]	Wax monoesters [FA0701]	HMDB0013228	--	Organic compounds	Organic nitrogen compounds	Organonitrogen compounds	Quaternary ammonium salts
neg_1817	5(S)-HPETE	42.5891	32.8394	26.5181	132.322	65.3771	219.321	173.813	270.971	276.126	236.718	59.929	235.39	3.92781	1.97372	0.000181223	2.0115	up	C05356	Arachidonic acid metabolism(ko00590);;Metabolic pathways(ko01100);;Serotonergic synapse(ko04726);;Ovarian steroidogenesis(ko04913)	--	--	--	--	HMDB0011135	74581-83-2	Organic compounds	Lipids and lipid-like molecules	Fatty Acyls	Eicosanoids
neg_1818	C11134	506.644	731.392	509.242	510.93	315.603	148.887	258.17	333.945	241.358	367.423	514.762	269.957	0.52443	-0.931178	0.0165992	1.61172	down	--	--	--	--	--	--	--	--	--	--	--	--
neg_1848	Lucidenic acid M	106.713	85.6827	56.3394	72.9569	85.2532	58.7343	67.0715	43.1721	66.6885	55.3466	81.389	58.2026	0.715117	-0.48375	0.0477476	1.45556	down	--	--	--	--	--	--	HMDB0035973	110241-33-3	Organic compounds	Lipids and lipid-like molecules	Prenol lipids	Triterpenoids
neg_1852	LysoPE(0:0/18:2(9Z,12Z))	94596.9	82476.8	84929.4	69777.7	78560.1	61064.5	75762.4	71660.4	73282.8	68380	82068.2	70030	0.853315	-0.228849	0.0413875	1.49439	down	--	--	--	--	--	--	HMDB0011477	--	Organic compounds	Lipids and lipid-like molecules	Glycerophospholipids	Glycerophosphoethanolamines
neg_1855	PKG Inhibitor	3756.18	3452.73	3261.39	2382.62	3036.53	1624.46	2862.84	2986.43	1939.99	2238.69	3177.89	2330.48	0.733343	-0.447441	0.0419834	1.43932	down	--	--	--	--	--	--	--	--	--	--	--	--
neg_1857	Pubescenol	51.4799	48.7273	36.3468	58.1945	50.7718	40.8063	45.9109	36.0811	24.3933	39.3813	49.1041	37.3146	0.759908	-0.396104	0.0482924	1.33381	down	--	--	LMPR0104300001	Prenol Lipids [PR]	Isoprenoids [PR01]	C20 isoprenoids (diterpenes) [PR0104]	HMDB0030085	90685-93-1	Organic compounds	Lipids and lipid-like molecules	Steroids and steroid derivatives	Steroid lactones
neg_1869	PC(P-18:0/PGE2)	11.4289	12.0596	3.21332	16.0012	11.1653	28.6997	28.8725	49.083	63.5079	48.4809	10.7737	43.7288	4.05886	2.02108	0.00591324	1.87026	up	--	--	--	--	--	--	HMDB0289553	--	--	--	--	--
neg_1874	(E)-3,7-Dimethyl-1,5,7-octatrien-3-ol	2542.93	2251.99	2249.45	2411.63	2304.59	1881.83	2002.15	2000.87	1492.86	1850.4	2352.12	1845.62	0.784663	-0.349855	0.00278461	1.84523	down	--	--	--	--	--	--	HMDB0032242	29171-20-8	Organic compounds	Organic oxygen compounds	Organooxygen compounds	Carbonyl compounds
neg_1875	LysoPE(0:0/18:1(11Z))	141802	137301	132955	136601	130028	114679	131337	133172	103108	116922	135737	119844	0.882909	-0.179663	0.0439121	1.47953	down	--	--	--	--	--	--	HMDB0011475	--	Organic compounds	Lipids and lipid-like molecules	Glycerophospholipids	Glycerophosphoethanolamines
neg_1881	PE(P-18:0/PGE2)	64.1077	57.9821	4.32062	74.6204	25.5781	73.1439	152.593	145.958	106.161	114.752	45.3218	118.521	2.61511	1.38687	0.00563402	1.76109	up	--	--	--	--	--	--	HMDB0285298	--	--	--	--	--
neg_1882	PS(20:4(6E,8Z,11Z,14Z)+=O(5)/22:0)	9.81723e-08	9.81723e-08	9.81723e-08	8.14662	6.43402	20.2245	11.1069	45.4196	35.3732	28.8222	2.91613	28.1893	9.66668	3.27302	0.0107371	1.7957	up	--	--	--	--	--	--	HMDB0282923	--	--	--	--	--
neg_1884	PE(16:0/20:3(8Z,11Z,14Z)-2OH(5,6))	30.6451	24.5985	6.2262	36.9336	17.3699	21.0752	164.682	147.389	136.449	120.023	23.1547	117.924	5.09287	2.34848	0.0184651	1.73741	up	--	--	--	--	--	--	HMDB0260924	--	--	--	--	--
neg_1885	PS(18:0/18:2(9Z,12Z))	78.7893	119.874	94.2605	184.941	115.465	389.923	214.209	568.667	315.076	396.19	118.666	376.813	3.17541	1.66694	0.00906613	1.82449	up	--	--	LMGP03010031	Glycerophospholipids [GP]	Glycerophosphoserines [GP03]	Diacylglycerophosphoserines [GP0301]	HMDB0012380	132014-81-4	Organic compounds	Lipids and lipid-like molecules	Glycerophospholipids	Glycerophosphoserines
neg_1891	2-[(L-Alanin-3-ylcarbamoyl)methyl]-3-(2-aminoethylcarbamoyl)-2-hydroxypropanoate	14.885	31.016	13.3652	36.0885	22.3201	56.5836	37.1546	86.6848	46.5131	54.8551	23.5349	56.3582	2.39466	1.25982	0.0128285	1.71174	up	C22074	Metabolic pathways(ko01100)	--	--	--	--	--	--	--	--	--	--
neg_1915	16-hydroxy hexadecanoic acid	409.051	357.108	357.712	441.128	388.423	624.509	684.539	1395.07	1245.77	1048.93	390.684	999.764	2.55901	1.35558	0.0154892	1.77878	up	--	--	--	--	--	--	--	--	--	--	--	--
neg_1922	11,12,13-Trinor-1(10)-spirovetivene-2,7-dione	7.84447	9.81723e-08	5.81474	34.061	10.0961	54.6868	46.0225	40.6825	28.5442	37.4226	11.5633	41.4717	3.58651	1.84258	0.00412525	1.81494	up	--	--	--	--	--	--	HMDB0036734	84413-75-2	Organic compounds	Organic oxygen compounds	Organooxygen compounds	Carbonyl compounds
neg_1923	PC(P-16:0/PGF2alpha)	411.838	278.486	188.445	1910.3	532.133	2823.98	2257	2871.06	2875.21	2726.65	664.24	2710.78	4.08103	2.02893	0.00168987	1.99518	up	--	--	--	--	--	--	HMDB0289455	--	--	--	--	--
neg_1925	PC(20:2(11Z,14Z)/PGJ2)	693.31	535.85	968.017	781.166	953.249	1158.4	1217.99	974.504	1333.85	999.164	786.318	1136.78	1.4457	0.53177	0.011123	1.63144	up	--	--	--	--	--	--	HMDB0287174	--	--	--	--	--
neg_1927	(6Z,9Z,12Z)-Octadecatrienoic acid	22.6454	18.76	15.9503	70.3196	32.2397	110.326	84.4097	103.702	88.1601	97.5702	31.983	96.8336	3.02766	1.5982	0.00126357	1.9846	up	C06426	Linoleic acid metabolism(ko00591);;Biosynthesis of unsaturated fatty acids(ko01040);;Metabolic pathways(ko01100)	--	--	--	--	HMDB0003073	506-26-3	Organic compounds	Lipids and lipid-like molecules	Fatty Acyls	Lineolic acids and derivatives
neg_1930	1-(3-Methylbutanoyl)-6-apiosylglucose	4.25364	2.56355	9.81723e-08	66.1553	18.8859	101.986	75.6923	102.696	63.7561	88.498	18.3717	86.5257	4.70973	2.23564	0.0025811	1.89778	up	--	--	--	--	--	--	HMDB0039953	467242-31-5	Organic compounds	Lipids and lipid-like molecules	Fatty Acyls	Fatty acyl glycosides
neg_1931	14-Fluoro-6-thiaheptadecanoic acid	9.56333	7.91115	12.3633	66.6214	8.44116	140.543	90.8982	168.08	73.2261	123.582	20.9801	119.266	5.68472	2.50709	0.00196774	1.89631	up	--	--	--	--	--	--	HMDB0244582	--	Organic compounds	Lipids and lipid-like molecules	Fatty Acyls	Fatty acids and conjugates
neg_1932	PE(20:3(6,8,11)-OH(5)/P-18:1(11Z))	166.103	127.527	76.2172	1154.02	322.479	1894.14	1624.21	1933.13	1333.66	1733.52	369.27	1703.73	4.61378	2.20595	0.00100399	1.98836	up	--	--	--	--	--	--	HMDB0285474	--	--	--	--	--
neg_1972	C16143	107.159	229.539	163.291	554.424	255.864	1056.4	554.733	768.527	770.107	816.051	262.055	793.164	3.0267	1.59775	0.00141531	1.89094	up	--	--	--	--	--	--	--	--	--	--	--	--
neg_1985	Hexadecanoic acid	10.741	5.65088	5.53149	11.5165	12.5019	15.7522	15.9376	24.1306	18.9899	20.849	9.18835	19.1319	2.08219	1.0581	0.001815	1.86648	up	C00249	Fatty acid biosynthesis(ko00061);;Fatty acid elongation(ko00062);;Fatty acid degradation(ko00071);;Biosynthesis of unsaturated fatty acids(ko01040);;Metabolic pathways(ko01100);;Fatty acid metabolism(ko01212)	LMFA01010001	Fatty Acyls [FA]	Fatty Acids and Conjugates [FA01]	Straight chain fatty acids [FA0101]	HMDB0000885	601-34-3	Organic compounds	Lipids and lipid-like molecules	Steroids and steroid derivatives	Steroid esters
neg_1986	13(S)-HODE	1274.83	978.153	997.62	2300.68	1343.05	3197.46	2314.9	4879.38	4515.31	4033.41	1378.87	3788.09	2.74725	1.45799	0.00362391	1.86796	up	C14762	Linoleic acid metabolism(ko00591);;PPAR signaling pathway(ko03320)	--	--	--	--	--	--	--	--	--	--
neg_1988	13-Hydroxy-9-methoxy-10-oxo-11-octadecenoic acid	74.5329	40.4625	51.7653	124.717	72.2719	179.413	124.213	266.601	207.439	217.334	72.7499	199	2.7354	1.45175	0.00285366	1.86887	up	--	--	--	--	--	--	HMDB0040901	150147-08-3	Organic compounds	Lipids and lipid-like molecules	Fatty Acyls	Lineolic acids and derivatives
neg_1993	5-Methoxytryptamine	61.9441	124.933	78.4316	75.9004	63.0525	13.2662	33.2281	63.9966	35.1852	41.7532	80.8524	37.4859	0.463633	-1.10894	0.017304	1.57718	down	C05659	Tryptophan metabolism(ko00380)	--	--	--	--	HMDB0004095	608-07-1	Organic compounds	Organoheterocyclic compounds	Indoles and derivatives	Tryptamines and derivatives
neg_1998	LysoPE(0:0/18:0)	5227.23	4663.34	3284.24	3911.22	4097.64	3367.24	3441.7	3620.27	2573.78	3287.19	4236.73	3258.04	0.768997	-0.37895	0.0398525	1.47789	down	--	--	--	--	--	--	HMDB0011129	899443-67-5	Organic compounds	Lipids and lipid-like molecules	Glycerophospholipids	Glycerophosphoethanolamines
neg_2008	3alpha,7alpha,12beta-Trihydroxy-5beta-cholanoic acid	22.3148	8.22241	8.60835	36.4398	14.2739	44.0781	24.4248	63.8892	61.0174	53.9869	17.9719	49.4793	2.75315	1.46109	0.0085762	1.71709	up	--	--	--	--	--	--	HMDB0000312	71883-64-2	Organic compounds	Lipids and lipid-like molecules	Steroids and steroid derivatives	Bile acids, alcohols and derivatives
neg_2015	Polyporusterone B	1267.09	1062.15	815.107	856.682	990.208	751.303	805.339	869.08	608.551	781.463	998.247	763.147	0.764487	-0.387435	0.0415747	1.48062	down	--	--	LMST01031298	Sterol Lipids [ST]	Sterols [ST01]	Ergosterols and C24-methyl derivatives [ST0103]	HMDB0038496	141360-89-6	Organic compounds	Lipids and lipid-like molecules	Steroids and steroid derivatives	Bile acids, alcohols and derivatives
neg_2019	PE(20:1(11Z)/16:0)	624.8	439.916	761.994	993.072	683.975	1318.15	1206.6	1837.38	1681.97	1744.83	700.751	1557.78	2.22302	1.15252	0.000723266	1.95637	up	--	--	LMGP02010847	Glycerophospholipids [GP]	Glycerophosphoethanolamines [GP02]	Diacylglycerophosphoethanolamines [GP0201]	HMDB0009253	--	Organic compounds	Lipids and lipid-like molecules	Glycerophospholipids	Glycerophosphoethanolamines
neg_2037	S-Methyl hexadecanethioate	9.81723e-08	9.81723e-08	9.81723e-08	17.9959	3.03725	43.4537	29.2055	50.825	39.613	45.5291	4.20663	41.7253	9.91893	3.31018	7.24694e-05	2.05144	up	--	--	--	--	--	--	--	--	--	--	--	--
neg_2038	Tenofovir exalidex	12174.8	7998.91	6560.38	10081.5	8921.81	8426.46	6739.68	5554.76	4502.53	6107.43	9147.47	6266.17	0.685017	-0.545787	0.0407845	1.44085	down	--	--	--	--	--	--	HMDB0250380	--	Organic compounds	Organoheterocyclic compounds	Imidazopyrimidines	Purines and purine derivatives
neg_2042	PC(15:0/P-16:0)	52.0063	106.3	186.947	238.055	235.646	455.904	278.578	353.711	302.557	392.757	163.791	356.701	2.17779	1.12286	0.00428839	1.79512	up	--	--	--	--	--	--	HMDB0007961	--	Organic compounds	Lipids and lipid-like molecules	Glycerophospholipids	Glycerophosphocholines
neg_2053	Taxa-4(20),11(12)-dien-5alpha,13alpha-diol	99.5183	72.4454	87.8974	226.3	115.448	362.505	353.066	558.979	416.391	448.879	120.322	427.964	3.55682	1.83059	0.000231052	2.02083	up	C11897	Metabolic pathways(ko01100)	LMPR0104390005	Prenol Lipids [PR]	Isoprenoids [PR01]	C20 isoprenoids (diterpenes) [PR0104]	--	--	--	--	--	--
neg_2055	(±)13-HDoHE	2793.05	2076.62	2009.61	11228.5	4128.33	19037.9	16973.3	30290.5	26162.5	24101.8	4447.22	23313.2	5.2422	2.39017	0.000326519	2.00346	up	--	--	--	--	--	--	--	--	--	--	--	--
neg_2057	Mevastatin	754.087	507.325	736.996	1766.79	890.359	2920.55	2570.14	3949.39	3519.22	3481.19	931.112	3288.1	3.53137	1.82023	9.54185e-05	2.04124	up	C13963	--	--	--	--	--	HMDB0254692	--	Organic compounds	Organoheterocyclic compounds	Lactones	Delta valerolactones
neg_2060	Erinacine C	49.3738	40.4024	41.5405	104.989	52.876	153.248	134.756	178.207	158.208	137.512	57.8363	152.386	2.63479	1.39769	0.000330292	2.01389	up	--	--	--	--	--	--	HMDB0040389	156101-09-6	Organic compounds	Organoheterocyclic compounds	Quinolines and derivatives	Benzoquinolines
neg_2068	1-Stearoylglycerophosphoserine	558.691	410.288	529.201	290.846	434.215	281.671	331.476	293.383	213.953	275.91	444.648	279.279	0.628089	-0.670959	0.0215722	1.68338	down	--	--	--	--	--	--	HMDB0061698	--	Organic compounds	Lipids and lipid-like molecules	Glycerophospholipids	Glycerophosphoserines
neg_2086	Dihydroactinidiolide	1.00279	0.575581	9.81723e-08	9.25714	3.1302	10.233	9.96585	21.6009	20.9517	19.0453	2.79314	16.3594	5.85697	2.55016	0.0033456	1.85292	up	--	--	--	--	--	--	HMDB0035240	15356-74-8	Organic compounds	Organoheterocyclic compounds	Benzofurans	--
neg_2088	Eicosapentaenoic acid	270.316	222.157	175.491	971.219	387.563	1117.84	1096.84	1938.39	1782.88	1566.8	405.349	1500.55	3.70188	1.88826	0.0013269	1.90565	up	C06428	Biosynthesis of unsaturated fatty acids(ko01040)	--	--	--	--	HMDB0001999	10417-94-4	Organic compounds	Lipids and lipid-like molecules	Fatty Acyls	Fatty acids and conjugates
neg_2096	(±)16-HETE	15256.3	12302.8	9507.75	45282.4	19886.7	51729.5	49536.6	77578.6	74044.4	65546.5	20447.2	63687.1	3.11471	1.6391	0.00105975	1.92225	up	--	--	--	--	--	--	--	--	--	--	--	--
neg_2101	Deoxyloganin	313.889	289.213	158.619	1406.28	494.453	1438.11	1378.05	2082.13	2233.01	1902.35	532.491	1806.73	3.39298	1.76255	0.0023542	1.8734	up	C06071	Metabolic pathways(ko01100)	LMPR0102070005	Prenol Lipids [PR]	Isoprenoids [PR01]	C10 isoprenoids (monoterpenes) [PR0102]	HMDB0251007	--	Organic compounds	Lipids and lipid-like molecules	Prenol lipids	Terpene glycosides
neg_2102	DG(2:0/18:2(10E,12Z)+=O(9)/0:0)	177.732	135.292	140.094	471.186	240.657	511.797	438.761	462.333	552.173	502.504	232.992	493.513	2.11815	1.08281	0.0114961	1.80748	up	--	--	--	--	--	--	HMDB0296955	--	--	--	--	--
neg_2103	1alpha-Hydroxyarbusculin A	52.9195	71.2379	108.94	72.8899	99.7035	70.9615	28.2574	43.8871	28.4523	54.4575	81.1382	45.2032	0.557113	-0.843957	0.0259913	1.51147	down	--	--	--	--	--	--	HMDB0037059	50301-94-5	Organic compounds	Lipids and lipid-like molecules	Prenol lipids	Terpene lactones
neg_2106	all-trans-4-Hydroxyretinoic acid	9.81723e-08	9.81723e-08	0.69708	6.9171	9.81723e-08	12.0206	18.521	63.0451	32.492	33.1144	1.52284	31.8386	20.9075	4.38595	0.0251855	1.68771	up	C16677	Retinol metabolism(ko00830);;Metabolic pathways(ko01100)	LMPR01090025	Prenol Lipids [PR]	Isoprenoids [PR01]	Retinoids [PR0109]	HMDB0006254	66592-72-1	Organic compounds	Lipids and lipid-like molecules	Prenol lipids	Retinoids
neg_2108	PC(P-16:0/PGE1)	6627.59	5455.06	4289.41	19560.6	8779.71	23603.1	22894.1	35142.3	34510.4	29733.5	8942.47	29176.7	3.26271	1.70607	0.000699712	1.94561	up	--	--	--	--	--	--	HMDB0289517	--	--	--	--	--
neg_2114	PE(20:1(11Z)/20:3(5Z,8Z,11Z))	4665.72	3854.61	2141.78	19000.5	6337.8	20518.8	18811.5	32439.4	30743.7	26855.8	7200.08	25873.8	3.59355	1.84541	0.00181234	1.88136	up	--	--	--	--	--	--	HMDB0009265	--	Organic compounds	Lipids and lipid-like molecules	Glycerophospholipids	Glycerophosphoethanolamines
neg_2115	PE(22:1(13Z)/6 keto-PGF1alpha)	39.8598	11.8082	8.27086	176.87	38.5795	220.554	177.051	308.284	233.91	260.344	55.0776	240.029	4.35801	2.12367	0.00170959	1.91206	up	--	--	--	--	--	--	HMDB0283846	--	--	--	--	--
neg_2116	Glycochenodeoxycholate	427.384	402.062	330.977	318.472	362.769	381.77	466.926	511.419	714.155	562.884	368.333	527.431	1.43194	0.517972	0.0423198	1.48087	up	C05466	Primary bile acid biosynthesis(ko00120);;Bile secretion(ko04976);;Cholesterol metabolism(ko04979)	--	--	--	--	HMDB0000637	640-79-9	Organic compounds	Lipids and lipid-like molecules	Steroids and steroid derivatives	Bile acids, alcohols and derivatives
neg_2118	PE-NMe2(18:1(11Z)/22:5(4Z,7Z,10Z,13Z,16Z))	438.373	425.43	148.244	1547.3	441.673	3016.8	2146.35	4869.36	3705.96	3547.74	600.204	3457.24	5.76011	2.5261	0.00121666	1.95729	up	--	--	--	--	--	--	HMDB0114033	--	Organic compounds	Lipids and lipid-like molecules	Glycerophospholipids	Glycerophosphoethanolamines
neg_2131	Cholylcitrulline	1986.67	1641.14	1833.98	1789.34	1770.51	1712.9	1771.28	1500.97	1554.69	1592.33	1804.33	1626.43	0.901405	-0.149753	0.0455286	1.42518	down	--	--	--	--	--	--	HMDB0242383	--	--	--	--	--
neg_2141	(R)-3,4-Dihydro-8-hydroxy-3-tridecyl-1H-2-benzopyran-1-one	436.328	217.092	200.312	635.414	354.684	1650.66	1507.43	2545.53	1519.05	1859.63	368.766	1816.46	4.92578	2.30035	0.000738623	2.02342	up	--	--	--	--	--	--	HMDB0041302	158627-93-1	Organic compounds	Organoheterocyclic compounds	Benzopyrans	2-benzopyrans
neg_2143	N-Lauroyl Asparagine	1.56673	0.0161531	9.81723e-08	12.4654	9.81723e-08	95.6615	44.8332	270.133	231.104	129.024	2.80966	154.151	54.8647	5.77781	0.0226546	1.70155	up	--	--	--	--	--	--	HMDB0242028	--	Organic compounds	Organic acids and derivatives	Carboxylic acids and derivatives	Amino acids, peptides, and analogues
neg_2156	CDP-DG(a-17:0/i-24:0)	3649.49	3886.09	3127.89	3335.01	3294.95	2954.06	2952.53	2445.84	3049.11	2735.6	3458.69	2827.43	0.817486	-0.290733	0.00728609	1.7294	down	--	--	--	--	--	--	HMDB0116114	--	Organic compounds	Lipids and lipid-like molecules	Glycerophospholipids	CDP-glycerols
neg_2158	8(S)-HETrE	2047.9	904.272	794.989	1709.87	1316.86	2838.58	3283.46	5011.66	3283.91	3689.79	1354.78	3621.48	2.67312	1.41852	0.00148904	1.91046	up	--	--	LMFA03050029	Fatty Acyls [FA]	Eicosanoids [FA03]	Hydroxy/hydroperoxyeicosatrienoic acids [FA0305]	--	--	--	--	--	--
neg_2177	Bifonazole	287096	294365	265475	293142	269374	266703	249005	224070	278146	250063	281890	253597	0.899631	-0.152595	0.0370351	1.46615	down	--	--	--	--	--	--	HMDB0015583	60628-96-8	Organic compounds	Benzenoids	Benzene and substituted derivatives	Diphenylmethanes
neg_2185	3-Oxohexadecanoic acid	340.096	417.795	337.636	546.421	377.576	890.358	558.943	768.981	813.645	762.665	403.905	758.918	1.87895	0.909929	0.00105206	1.92766	up	--	--	--	--	--	--	HMDB0010733	--	Organic compounds	Lipids and lipid-like molecules	Fatty Acyls	Fatty acids and conjugates
neg_2188	PI(20:5(5Z,8Z,11Z,14Z,17Z)/0:0)	246.221	166.703	198.069	142.826	183.276	166.542	107.994	46.4813	101.816	108.174	187.419	106.201	0.566651	-0.819467	0.0136109	1.66419	down	--	--	LMGP06050026	Glycerophospholipids [GP]	Glycerophosphoinositols [GP06]	Monoacylglycerophosphoinositols [GP0605]	--	--	--	--	--	--
neg_2189	Bis(beta-D-glucosyl) crocetin	5051.05	4145.04	5017.08	4303.79	4553.26	4298.04	3962.14	3425.45	3370.72	3773.88	4614.04	3766.05	0.816214	-0.292981	0.00985709	1.69705	down	C19868	Metabolic pathways(ko01100)	--	--	--	--	--	--	--	--	--	--
neg_2196	Prolylhydroxyproline	63.7571	61.1801	71.4516	100.82	67.5441	128.229	92.5495	152.253	144.52	137.692	72.9506	131.049	1.7964	0.845112	0.00240258	1.86912	up	--	--	--	--	--	--	HMDB0006695	18684-24-7	Organic compounds	Organic acids and derivatives	Carboxylic acids and derivatives	Amino acids, peptides, and analogues
neg_2212	delta-Terpineol	38.1073	33.6773	26.6806	34.0447	38.4422	24.8495	32.7606	22.9486	20.6239	22.3511	34.1904	24.7068	0.722622	-0.468687	0.0134228	1.61254	down	--	--	--	--	--	--	HMDB0036991	17023-62-0	Organic compounds	Lipids and lipid-like molecules	Prenol lipids	Monoterpenoids
neg_2229	PC(P-18:0/PGF1alpha)	33.3965	32.6322	9.81723e-08	97.0764	16.2616	162.074	116.959	251.849	225.427	180.696	35.8733	187.401	5.22397	2.38515	0.00112135	1.92679	up	--	--	--	--	--	--	HMDB0289625	--	--	--	--	--
neg_2230	Siderol	922.572	469.358	364.737	943.321	656.952	1877.86	1856.87	3247.75	2282.09	2394.76	671.388	2331.87	3.4732	1.79627	0.00124881	1.97172	up	--	--	--	--	--	--	HMDB0034944	19885-22-4	Organic compounds	Lipids and lipid-like molecules	Prenol lipids	Diterpenoids
neg_2231	11-Dehydro-thromboxane B2	23.597	9.37118	23.7895	73.0307	39.3031	146.391	104.817	204.334	163.489	169.31	33.8183	157.668	4.66222	2.22102	0.00039127	2.00053	up	C05964	Arachidonic acid metabolism(ko00590);;Metabolic pathways(ko01100);;Serotonergic synapse(ko04726)	LMFA03030014	Fatty Acyls [FA]	Eicosanoids [FA03]	Thromboxanes [FA0303]	HMDB0004242	67910-12-7	Organic compounds	Lipids and lipid-like molecules	Fatty Acyls	Eicosanoids
neg_2253	16-Oxopalmitate	175.345	158.219	137.137	196.069	161.478	291.744	211.447	297.907	282.333	289.651	165.65	274.617	1.65782	0.729283	0.000799229	1.96257	up	C19614	Metabolic pathways(ko01100)	--	--	--	--	--	--	--	--	--	--
neg_2254	(Z)-9-Cycloheptadecen-1-one	551.724	833.592	737.957	1269.5	807.783	1801.59	1096.87	1420.66	2877.84	1824.81	840.111	1804.35	2.14776	1.10283	0.0289122	1.58232	up	--	--	--	--	--	--	HMDB0031336	542-46-1	Organic compounds	Organic oxygen compounds	Organooxygen compounds	Carbonyl compounds
neg_2255	3alpha,11beta,21-Trihydroxy-20-oxo-5beta-pregnan-18-al	51.1975	101.947	89.9445	146.953	98.0217	216.672	126.222	157.803	195.777	176.114	97.6128	174.518	1.78786	0.838232	0.00777278	1.71873	up	C05474	Steroid hormone biosynthesis(ko00140)	LMST02030275	Sterol Lipids [ST]	Steroids [ST02]	C21 steroids (gluco/mineralocorticoids, progestogins) and derivatives [ST0203]	HMDB0006753	--	Organic compounds	Lipids and lipid-like molecules	Steroids and steroid derivatives	Hydroxysteroids
neg_2258	CP 47,497-C8-homolog C-8-hydroxy metabolite	141.759	93.8245	70.0895	751.015	232.493	1691.23	1243.75	2689.07	2140.01	2043.99	257.836	1961.61	7.60797	2.92751	0.000737336	1.99512	up	--	--	--	--	--	--	--	--	--	--	--	--
neg_2315	(9Z)-Hexadecenoic acid	129.835	130.204	115.463	181.093	119.288	145.689	71.5255	38.8304	29.8064	59.7935	135.177	69.1289	0.511397	-0.967484	0.029585	1.50631	down	C08362	Fatty acid biosynthesis(ko00061);;Metabolic pathways(ko01100)	--	--	--	--	HMDB0003229	373-49-9	Organic compounds	Lipids and lipid-like molecules	Fatty Acyls	Fatty acids and conjugates
neg_2353	(R)-3-Hydroxy-hexadecanoic acid	111.051	159.767	159.859	232.331	171.613	343.035	237.958	275.014	205.575	265.218	166.924	265.36	1.58971	0.668759	0.0115416	1.67856	up	--	--	--	--	--	--	HMDB0010734	--	Organic compounds	Lipids and lipid-like molecules	Fatty Acyls	Fatty acids and conjugates
neg_2356	C21481	43.12	64.6661	49.6	78.355	63.1301	123.308	82.8154	93.3955	91.3398	82.9337	59.7742	94.7584	1.58527	0.664731	0.0072314	1.72592	up	--	--	--	--	--	--	--	--	--	--	--	--
neg_2386	LysoPA(0:0/18:0)	944.785	927.7	867.608	826.535	844.356	788.118	792.444	712.511	704.597	734.652	882.197	746.464	0.846143	-0.241027	0.00205133	1.87362	down	--	--	--	--	--	--	HMDB0007850	--	Organic compounds	Lipids and lipid-like molecules	Glycerophospholipids	Glycerophosphates
neg_2403	3b,12a-Dihydroxy-5a-cholanoic acid	44.5256	102.546	66.0577	103.322	61.7706	62.9831	33.5585	41.9587	21.6835	43.0681	75.6444	40.6504	0.537388	-0.895965	0.0390121	1.4167	down	--	--	--	--	--	--	HMDB0000348	2569-04-02	Organic compounds	Lipids and lipid-like molecules	Steroids and steroid derivatives	Bile acids, alcohols and derivatives
neg_2405	(7Z,10Z,13Z,16Z,19Z)-Docosapentaenoic acid	18.7839	50.2889	34.9933	80.5279	42.5861	127.47	66.9468	100.484	87.4518	98.9473	45.436	96.2601	2.11859	1.0831	0.00714644	1.73794	up	C16513	Biosynthesis of unsaturated fatty acids(ko01040)	--	--	--	--	--	--	--	--	--	--
neg_2465	Hept-2-en-1-yl isovalerate	231.939	389.722	306.07	377.619	316.295	280.112	241.858	251.925	206.735	247.237	324.329	245.573	0.757173	-0.401306	0.0472093	1.40669	down	--	--	--	--	--	--	HMDB0303232	--	Organic compounds	Lipids and lipid-like molecules	Fatty Acyls	Fatty acids and conjugates
neg_2492	1-Lyso-2-arachidonoyl-phosphatidate	1745.59	1880.11	1653.92	2108.36	1708.78	1563.83	1068.99	1320.77	1152.3	1275.36	1819.35	1276.25	0.701487	-0.511512	0.00169617	1.82749	down	--	--	--	--	--	--	HMDB0012496	--	Organic compounds	Lipids and lipid-like molecules	Glycerophospholipids	Glycerophosphates
neg_2504	DG(22:0/6 keto-PGF1alpha/0:0)	563.96	467.875	514.675	487.681	505.48	452.888	403.316	407.697	244.216	390.215	507.934	379.666	0.747472	-0.419909	0.018404	1.65324	down	--	--	--	--	--	--	HMDB0296703	--	--	--	--	--
neg_2511	Calcidiol	101.409	143.412	120.464	144.332	123.192	109.874	76.3888	86.0793	55.982	79.275	126.562	81.5198	0.644111	-0.634619	0.00519642	1.71277	down	C01561	Steroid biosynthesis(ko00100);;Metabolic pathways(ko01100);;Parathyroid hormone synthesis, secretion and action(ko04928);;Tuberculosis(ko05152)	LMST03020246	Sterol Lipids [ST]	Secosteroids [ST03]	Vitamin D3 and derivatives [ST0302]	HMDB0003550	19356-17-3	Organic compounds	Lipids and lipid-like molecules	Steroids and steroid derivatives	Vitamin D and derivatives
neg_2546	15-Hydroxy-11alpha,9alpha-(epoxymethano)prosta-5,13-dienoic acid	662.546	563.28	603.023	607.281	618.457	480.415	419.739	364.485	274.284	418.649	610.917	391.514	0.640863	-0.641912	0.00148792	1.94919	down	--	--	--	--	--	--	HMDB0244668	--	Organic compounds	Lipids and lipid-like molecules	Fatty Acyls	Eicosanoids
neg_2556	8,11-eicosadiynoic acid	18813.3	20025.8	16650.6	20584.2	17679.4	16149.1	13568.6	11075.6	8149.98	11545.4	18750.7	12097.7	0.645189	-0.632205	0.00432724	1.80954	down	--	--	LMFA01030688	Fatty Acyls [FA]	Fatty Acids and Conjugates [FA01]	Unsaturated fatty acids [FA0103]	--	--	--	--	--	--
neg_2562	Tetrahydrofolate	52.9532	61.5336	30.1784	59.4185	38.119	45.2293	17.3282	16.173	28.4588	24.0249	48.4405	26.2428	0.541753	-0.884292	0.0256413	1.50617	down	C00101	Glycine, serine and threonine metabolism(ko00260);;One carbon pool by folate(ko00670);;Lipoic acid metabolism(ko00785);;Folate biosynthesis(ko00790);;Aminoacyl-tRNA biosynthesis(ko00970);;Metabolic pathways(ko01100);;Carbon metabolism(ko01200);;Biosynthesis of cofactors(ko01240);;Antifolate resistance(ko01523);;Cobalamin transport and metabolism(ko04980)	--	--	--	--	HMDB0304496	--	Organic compounds	Organic oxygen compounds	Organooxygen compounds	Carbonyl compounds
neg_2568	6-Ethylchenodeoxycholic acid	1516.97	2709.18	1921.69	2380.66	1995.08	1875.86	1486.88	1367.36	1038.12	1364.56	2104.72	1426.56	0.67779	-0.561089	0.0278366	1.48417	down	C15636	--	--	--	--	--	--	--	--	--	--	--
neg_2599	Vofopitant	591.342	467.985	592.732	526.706	527.321	515.965	476.829	449.7	292.736	432.605	541.217	433.567	0.801096	-0.319953	0.0480974	1.42249	down	--	--	--	--	--	--	--	--	--	--	--	--
neg_2607	Filipin II	32.6382	34.2594	35.5101	54.357	43.6257	54.9218	38.6116	70.2304	65.3321	72.396	40.0781	60.2984	1.50452	0.589307	0.0297931	1.55112	up	--	--	--	--	--	--	HMDB0242297	--	Organic compounds	Phenylpropanoids and polyketides	Macrolides and analogues	--
neg_2615	(-)-3-Cyanomethyl-3-hydroxy-1H-indol-2(3H)-one	12452.2	11889.1	10345.2	10589.1	10104.2	11058.9	9910.07	9064.24	8612.74	9014.74	11076	9532.13	0.860614	-0.216562	0.0413342	1.4474	down	--	--	--	--	--	--	HMDB0038633	137761-24-1	Organic compounds	Organoheterocyclic compounds	Indoles and derivatives	Indolines
neg_2621	Biotin sulfone	828.438	786.124	653.065	669.494	676.016	684.702	631.627	566.451	538.309	578.445	722.627	599.907	0.830175	-0.268513	0.0255322	1.55599	down	C20387	Biotin metabolism(ko00780)	--	--	--	--	HMDB0004818	40720-05-6	Organic compounds	Organoheterocyclic compounds	Thienoimidazolidines	--
neg_2635	Teasterone	511.578	516.975	442.179	394.001	444.922	347.719	378.067	344.759	353.721	380.546	461.931	360.962	0.78142	-0.355829	0.0096725	1.81696	down	C15791	Metabolic pathways(ko01100)	LMST01030121	Sterol Lipids [ST]	Sterols [ST01]	Ergosterols and C24-methyl derivatives [ST0103]	--	--	--	--	--	--
neg_2660	trans-16-Octadecenoic acid	11475.9	11767.2	10042.3	11908.8	11513.5	8799.38	7837.25	7029.53	6311.22	7493.17	11341.6	7494.11	0.660765	-0.59779	0.000112317	2.00889	down	--	--	LMFA01030081	Fatty Acyls [FA]	Fatty Acids and Conjugates [FA01]	Unsaturated fatty acids [FA0103]	HMDB0304769	--	Organic compounds	Lipids and lipid-like molecules	Fatty Acyls	Fatty acids and conjugates
neg_2670	Tetrahydrocorticosterone	486.042	408.636	396.048	423.298	440.673	309.715	268.18	228.285	268.734	270.987	430.939	269.18	0.624636	-0.678912	5.46666e-05	2.05775	down	C05476	Steroid hormone biosynthesis(ko00140)	LMST02030100	Sterol Lipids [ST]	Steroids [ST02]	C21 steroids (gluco/mineralocorticoids, progestogins) and derivatives [ST0203]	HMDB0000268	68-42-8	Organic compounds	Lipids and lipid-like molecules	Steroids and steroid derivatives	Hydroxysteroids
neg_2672	1,2,10-Trihydroxydihydro-trans-linalyl oxide 7-O-beta-D-glucopyranoside	5929.99	4481.47	5442.46	4701.03	5470.63	4138.99	3438.26	2366.78	2727.81	3187.08	5205.12	3171.79	0.609359	-0.714635	0.00107942	1.91627	down	--	--	--	--	--	--	HMDB0033237	219814-37-6	Organic compounds	Organic oxygen compounds	Organooxygen compounds	Carbohydrates and carbohydrate conjugates
neg_2678	(R)-Mevalonate	117.337	103.723	130.454	81.5173	117.015	104.231	60.0683	62.8567	41.7096	66.0971	110.009	66.9924	0.608971	-0.715555	0.0120604	1.67831	down	C00418	Terpenoid backbone biosynthesis(ko00900);;Metabolic pathways(ko01100);;Ferroptosis(ko04216)	--	--	--	--	HMDB0000227	17817-88-8	Organic compounds	Lipids and lipid-like molecules	Fatty Acyls	Fatty acids and conjugates
neg_2682	7-[(1R,2R,3R,5S)-3,5-Dihydroxy-2-[(3S)-3-hydroxyoctyl]cyclopentyl]heptanoylcarnitine	51.6075	65.7754	73.5826	52.0843	83.1415	53.1934	40.8333	45.4803	40.1394	57.137	65.2382	47.3567	0.725904	-0.46215	0.0416271	1.45353	down	--	--	--	--	--	--	HMDB0241885	--	Organic compounds	Lipids and lipid-like molecules	Fatty Acyls	Eicosanoids
neg_2689	Farnesoic acid	370.355	382.125	422.267	566.343	467.458	270.922	340.647	324.973	238.192	358.458	441.71	306.638	0.694208	-0.526561	0.0154986	1.5624	down	C16502	Insect hormone biosynthesis(ko00981)	--	--	--	--	--	--	--	--	--	--
neg_2713	Galaxolide	1650.94	1549.54	1769.14	1686.25	1713.76	1610.36	1539	1497.81	1311.09	1550.51	1673.92	1501.75	0.897146	-0.156585	0.0277431	1.50064	down	--	--	--	--	--	--	--	--	--	--	--	--
neg_2716	3-Hexaprenyl-4,5-dihydroxybenzoate	246.421	256.003	257.253	258.726	264.378	252.435	197.658	227.387	236.246	234.993	256.556	229.744	0.89549	-0.159251	0.0379458	1.53634	down	C05200	--	--	--	--	--	HMDB0001063	63975-40-6	Organic compounds	Lipids and lipid-like molecules	Prenol lipids	Polyprenylphenols
neg_2724	Octadecanoic acid	149.119	175.013	109.82	184.043	143.956	162.378	86.394	98.2481	80.175	106.769	152.39	106.793	0.700787	-0.512953	0.0489759	1.35275	down	C01530	Fatty acid biosynthesis(ko00061);;Biosynthesis of unsaturated fatty acids(ko01040);;Metabolic pathways(ko01100);;Phototransduction - fly(ko04745)	LMFA01010018	Fatty Acyls [FA]	Fatty Acids and Conjugates [FA01]	Straight chain fatty acids [FA0101]	HMDB0000827	1957-11-04	Organic compounds	Lipids and lipid-like molecules	Fatty Acyls	Fatty acids and conjugates
neg_2748	20,26-Dihydroxyecdysone	81.0999	69.1361	64.0286	65.6625	62.098	55.6816	58.4537	54.6378	43.7292	53.2863	68.405	53.1577	0.777103	-0.363823	0.00771591	1.72728	down	C16500	Insect hormone biosynthesis(ko00981)	LMST01010184	Sterol Lipids [ST]	Sterols [ST01]	Cholesterol and derivatives [ST0101]	HMDB0245570	--	Organic compounds	Lipids and lipid-like molecules	Steroids and steroid derivatives	Bile acids, alcohols and derivatives
neg_2763	2,6,10,10-Tetramethyl-1-oxaspiro[4.5]decan-6-ol	81.0194	124.308	95.4418	119.511	102.878	95.603	80.6711	68.3142	57.7555	74.1092	104.631	75.2906	0.719579	-0.474775	0.0210559	1.51357	down	--	--	--	--	--	--	HMDB0037907	53398-90-6	Organic compounds	Organoheterocyclic compounds	Tetrahydrofurans	--
neg_2783	QUINALPHOS	463.588	384.584	348.722	361.646	362.485	369.738	316.619	322.953	297.019	297.494	384.205	320.764	0.834879	-0.260362	0.0371479	1.50662	down	C11030	--	--	--	--	--	HMDB0257033	--	Organic compounds	Organoheterocyclic compounds	Diazanaphthalenes	Benzodiazines
neg_2803	(2R,3R)-3-Methylornithinyl-N6-lysine	139.187	118.486	142.689	139.314	140.737	119.636	119.958	125.964	74.4996	100.184	136.083	108.048	0.79399	-0.332807	0.0382275	1.48943	down	C20278	Lysine biosynthesis(ko00300);;Metabolic pathways(ko01100)	--	--	--	--	--	--	--	--	--	--
neg_2805	Ginsenoside C-K	2132.35	1786.91	2299.64	1988.11	2111.69	1925.67	1899.2	1861.76	1515.63	1797.02	2063.74	1799.85	0.872132	-0.197381	0.0483219	1.39844	down	C22127	--	--	--	--	--	HMDB0252724	--	Organic compounds	Lipids and lipid-like molecules	Prenol lipids	Triterpenoids
neg_2814	PG(20:1(11Z)/PGE2)	129.604	126.609	125.67	135.532	126.827	112.247	86.791	95.208	28.7149	63.2305	128.849	77.2382	0.59945	-0.738289	0.0228726	1.69032	down	--	--	--	--	--	--	HMDB0269515	--	--	--	--	--
neg_2815	alpha-Tocopherol	281.901	326.864	247.469	260.028	287.271	215.24	231.309	224.744	162.589	188.273	280.707	204.431	0.728273	-0.45745	0.00353728	1.78327	down	C02477	Ubiquinone and other terpenoid-quinone biosynthesis(ko00130);;Metabolic pathways(ko01100);;Biosynthesis of cofactors(ko01240);;Ferroptosis(ko04216);;Vitamin digestion and absorption(ko04977)	LMPR02020001	Prenol Lipids [PR]	Quinones and hydroquinones [PR02]	Vitamin E [PR0202]	HMDB0001893	1959-02-09	Organic compounds	Lipids and lipid-like molecules	Prenol lipids	Quinone and hydroquinone lipids
neg_2825	(Z,Z)-3,6-Dodecadien-1-ol	112.16	167.295	114.66	143.352	138.178	108.068	81.143	104.334	93.7657	97.1977	135.129	96.9018	0.717105	-0.479744	0.0155991	1.64307	down	--	--	LMFA05000573	Fatty Acyls [FA]	Fatty alcohols [FA05]	-	HMDB0031102	29125-78-8	Organic compounds	Lipids and lipid-like molecules	Fatty Acyls	Fatty alcohols
neg_2829	(3alphaOH,20S,24S)-3,19:20,24-Diepoxydammarane-3,25-diol	2036.75	3137.35	2378.63	2739.85	2524.12	2184.17	1978.5	1898.95	1453.8	1803.14	2563.34	1863.71	0.727065	-0.459844	0.0155967	1.5906	down	--	--	--	--	--	--	HMDB0034683	189031-58-1	Organic compounds	Lipids and lipid-like molecules	Prenol lipids	Terpene glycosides
neg_2844	alpha-Valerenol	359.965	541.144	439.546	449.526	430.544	411.308	322.331	338.017	372.17	326.666	444.145	354.099	0.797259	-0.32688	0.0336104	1.4885	down	--	--	--	--	--	--	HMDB0034661	101628-22-2	Organic compounds	Lipids and lipid-like molecules	Prenol lipids	Sesquiterpenoids
neg_2846	6-((3-Cyclobutyl-2,3,4,5-tetrahydro-1H-3-benzazepin-7-yl)oxy)-N-methyl-3-pyridinecarboxamide	151.735	135.666	142.607	128.152	134.96	138.1	124.987	119.347	90.654	107.016	138.624	116.021	0.836946	-0.256793	0.0469643	1.47321	down	--	--	--	--	--	--	HMDB0247320	--	Organic compounds	Organoheterocyclic compounds	Benzazepines	--
neg_2932	Germacrenone	125.83	179.921	136.809	155.849	148.566	128.267	115.053	103.858	122.27	127.632	149.395	119.416	0.79933	-0.323136	0.0272726	1.5272	down	--	--	--	--	--	--	HMDB0035887	99957-12-7	Organic compounds	Lipids and lipid-like molecules	Prenol lipids	Sesquiterpenoids
neg_3051	LysoPI(0:0/18:0)	899.687	763.35	691.729	829.539	726.666	758.013	628.325	499.02	516.828	690.324	782.194	618.502	0.790727	-0.338749	0.0318432	1.47606	down	--	--	--	--	--	--	HMDB0061704	1913287-87-2	Organic compounds	Lipids and lipid-like molecules	Glycerophospholipids	Glycerophosphoinositols
neg_508	Pseudouridine 5'-phosphate	22.5035	17.3099	21.1969	40.7998	28.8209	82.5157	105.971	36.0391	60.9377	70.2107	26.1262	71.1349	2.72274	1.44506	0.0145673	1.73147	up	C01168	Pyrimidine metabolism(ko00240);;Metabolic pathways(ko01100)	--	--	--	--	HMDB0001271	1157-60-4	Organic compounds	Organic oxygen compounds	Organooxygen compounds	Carbohydrates and carbohydrate conjugates
neg_515	Nicotinate D-ribonucleotide	2381.94	1931.6	2086.91	4450.84	2613.67	5688.2	5757.33	5178.8	4302.81	4954.47	2692.99	5176.32	1.92214	0.942717	0.00271432	1.89489	up	C01185	Nicotinate and nicotinamide metabolism(ko00760);;Metabolic pathways(ko01100);;Biosynthesis of cofactors(ko01240)	--	--	--	--	HMDB0001132	321-02-8	Organic compounds	Nucleosides, nucleotides, and analogues	Pyridine nucleotides	Nicotinic acid nucleotides
neg_518	2-Methylpropyl glucosinolate	56.6859	116.498	95.2215	119.724	87.3256	57.0934	16.206	37.2715	72.7806	44.5145	95.0909	45.5732	0.479259	-1.06112	0.0107712	1.63073	down	C17256	2-Oxocarboxylic acid metabolism(ko01210)	--	--	--	--	HMDB0038421	38226-91-4	Organic compounds	Organic oxygen compounds	Organooxygen compounds	Carbohydrates and carbohydrate conjugates
neg_521	dTDP	26.558	8.54426	20.731	57.3695	27.1613	89.7652	89.9828	88.8742	59.9078	81.1086	28.0728	81.9277	2.9184	1.54518	0.000861153	1.95368	up	C00363	Pyrimidine metabolism(ko00240);;Metabolic pathways(ko01100);;Nucleotide metabolism(ko01232)	--	--	--	--	HMDB0001274	491-97-4	Organic compounds	Nucleosides, nucleotides, and analogues	Pyrimidine nucleotides	Pyrimidine deoxyribonucleotides
neg_522	6-Thioxanthine 5'-monophosphate	110.798	63.6162	99.4602	226.257	114.052	402.459	410.923	325.805	241.085	318.701	122.837	339.794	2.76623	1.46792	0.000829587	1.93111	up	C16618	Drug metabolism - other enzymes(ko00983)	--	--	--	--	HMDB0060418	--	Organic compounds	Organoheterocyclic compounds	Diazines	Pyrimidines and pyrimidine derivatives
neg_575	Uridine	302.442	209.04	361.427	427.113	286.563	859.924	396.904	747.991	541.71	619.814	317.317	633.269	1.9957	0.996893	0.01311	1.70476	up	C00299	Pyrimidine metabolism(ko00240);;Metabolic pathways(ko01100);;Nucleotide metabolism(ko01232);;ABC transporters(ko02010)	--	--	--	--	HMDB0000296	58-96-8	Organic compounds	Nucleosides, nucleotides, and analogues	Pyrimidine nucleosides	--
neg_576	5-Fluorodeoxyuridine	59.1485	40.8245	46.4478	40.1864	38.5561	93.1565	70.0372	138.99	100.529	100.878	45.0327	100.718	2.23656	1.16128	0.00534165	1.85498	up	C11736	Drug metabolism - other enzymes(ko00983)	--	--	--	--	HMDB0033576	274-45-3	Organic compounds	Organoheterocyclic compounds	Pyrrolopyrazines	--
neg_640	D-Glucose	1184.87	1475.34	715.409	1693.76	1265.38	2144.95	3524.31	1648.21	3218.55	2426.93	1266.95	2592.59	2.04632	1.03303	0.0143519	1.69602	up	C00031	Glycolysis / Gluconeogenesis(ko00010);;Pentose phosphate pathway(ko00030);;Galactose metabolism(ko00052);;Starch and sucrose metabolism(ko00500);;Amino sugar and nucleotide sugar metabolism(ko00520);;Neomycin, kanamycin and gentamicin biosynthesis(ko00524);;Metabolic pathways(ko01100);;ABC transporters(ko02010);;HIF-1 signaling pathway(ko04066);;FoxO signaling pathway(ko04068);;Efferocytosis(ko04…	--	--	--	--	HMDB0000122	492-61-5	Organic compounds	Organic oxygen compounds	Organooxygen compounds	Carbohydrates and carbohydrate conjugates
neg_643	(R)-Mevalonate 3-phosphate	709.28	614.44	453.465	706.148	637.702	932.177	1320.88	736.381	1024.86	928.465	624.207	988.552	1.58369	0.663292	0.0147046	1.68009	up	C20847	Terpenoid backbone biosynthesis(ko00900);;Metabolic pathways(ko01100)	--	--	--	--	--	--	--	--	--	--
neg_651	Azvudine	77.9135	187.266	79.2707	177.58	129.238	179.55	261.67	174.313	346.484	231.752	130.254	238.754	1.83299	0.874198	0.0263008	1.5418	up	--	--	--	--	--	--	HMDB0248824	--	Organic compounds	Organoheterocyclic compounds	Diazines	Pyrimidines and pyrimidine derivatives
neg_670	(+)-2-Amino-7-phosphonoheptanoic acid	285.855	165.622	332.122	206.216	233.994	132.069	109.85	222.133	130.867	158.882	244.762	150.761	0.615948	-0.699119	0.0321322	1.51795	down	--	--	--	--	--	--	HMDB0242241	--	Organic compounds	Organic acids and derivatives	Carboxylic acids and derivatives	Amino acids, peptides, and analogues
neg_723	L-Tryptophan	12389.4	10694	9644.15	10883.4	10019.1	4970.87	8764.85	7501.7	7845.46	6858.61	10726	7188.3	0.670175	-0.57739	0.00251972	1.83484	down	C00078	Glycine, serine and threonine metabolism(ko00260);;Tryptophan metabolism(ko00380);;Phenylalanine, tyrosine and tryptophan biosynthesis(ko00400);;Aminoacyl-tRNA biosynthesis(ko00970);;Metabolic pathways(ko01100);;2-Oxocarboxylic acid metabolism(ko01210);;Biosynthesis of amino acids(ko01230);;Biosynthesis of cofactors(ko01240);;Axon regeneration(ko04361);;Serotonergic synapse(ko04726);;Protein dige…	--	--	--	--	HMDB0000929	73-22-3	Organic compounds	Organoheterocyclic compounds	Indoles and derivatives	Indolyl carboxylic acids and derivatives
neg_728	Dihydrokalafungin	54.4658	54.1188	56.1898	47.635	59.3241	54.9261	39.4716	41.9727	43.9761	42.3277	54.3467	44.5349	0.819458	-0.287258	0.0201623	1.61332	down	C12436	Metabolic pathways(ko01100)	--	--	--	--	--	--	--	--	--	--
neg_732	S-Nitrosocaptopril	846.796	414.896	496.864	404.545	438.337	113.205	362.41	314.074	282.054	241.962	520.288	262.741	0.504992	-0.985668	0.0332033	1.55245	down	--	--	--	--	--	--	HMDB0257416	--	Organic compounds	Organic acids and derivatives	Carboxylic acids and derivatives	Amino acids, peptides, and analogues
neg_733	5-L-Glutamyl-taurine	448.793	198.111	261.129	185.515	233.684	41.2064	154.334	152.542	144.892	117.325	265.446	122.06	0.459828	-1.12083	0.036525	1.5526	down	C05844	Taurine and hypotaurine metabolism(ko00430)	--	--	--	--	HMDB0004195	--	Organic compounds	Organic acids and derivatives	Carboxylic acids and derivatives	Amino acids, peptides, and analogues
neg_736	Apigenin 7-di-O-xyloside	47.4128	59.7073	24.6693	54.9702	30.5589	6.32564	14.4268	13.7862	18.2814	15.1977	43.4637	13.6035	0.312986	-1.67583	0.00984006	1.77657	down	--	--	--	--	--	--	HMDB0302800	--	Organic compounds	Phenylpropanoids and polyketides	Flavonoids	Flavonoid glycosides
neg_737	3-Maleimidobenzoic acid N-hydroxysuccinimide ester	48.2344	23.9695	34.6122	32.3364	28.8431	6.61155	14.8214	20.1102	22.6159	18.2609	33.5991	16.484	0.490608	-1.02736	0.0102663	1.7028	down	--	--	--	--	--	--	HMDB0246994	--	Organic compounds	Benzenoids	Benzene and substituted derivatives	Benzoic acids and derivatives
neg_738	Aldotetraouronic acid	190.814	98.6511	73.7301	86.9765	84.5138	4.5196	61.0788	36.957	35.5823	30.0294	106.937	33.6334	0.314516	-1.66879	0.0225564	1.64404	down	C20573	ABC transporters(ko02010)	--	--	--	--	--	--	--	--	--	--
neg_745	5'-Phosphoribosylglycinamide	186.91	256.912	199.939	254.139	237.154	138.262	136.619	129.929	141.733	134.048	227.01	136.118	0.599612	-0.7379	0.00283897	1.94982	down	C03838	Purine metabolism(ko00230);;Metabolic pathways(ko01100)	--	--	--	--	HMDB0002022	10074-18-7	Organic compounds	Nucleosides, nucleotides, and analogues	Glycinamide ribonucleotides	--
neg_746	C06397	778.1	1325.67	657.643	1226.04	947.66	532.002	511.14	474.298	602.146	525.109	987.021	528.939	0.535894	-0.899981	0.0219539	1.65662	down	--	--	--	--	--	--	--	--	--	--	--	--
neg_749	UDP-3-O-(3-hydroxytetradecanoyl)-D-glucosamine	36.2729	102.241	23.3849	88.3401	46.5706	9.76256	10.2361	6.36754	31.5703	19.0955	59.3618	15.4064	0.259534	-1.94601	0.0426928	1.47182	down	C06022	Metabolic pathways(ko01100)	--	--	--	--	--	--	--	--	--	--
neg_802	Zeanoside B	97.9594	116.888	110.622	117.555	107.169	112.38	123.337	131.257	156.591	132.495	110.039	131.212	1.19242	0.253889	0.0413995	1.48953	up	--	--	--	--	--	--	HMDB0038844	113202-67-8	Organic compounds	Organic oxygen compounds	Organooxygen compounds	Carbohydrates and carbohydrate conjugates
neg_807	2'-Deoxy-5'-O-thiophosphonouridine	66.7467	56.654	58.2545	65.1008	61.5957	53.0661	40.8551	46.2224	61.6911	53.1401	61.6703	50.995	0.826896	-0.274222	0.0366285	1.4956	down	--	--	--	--	--	--	HMDB0251638	--	Organic compounds	Nucleosides, nucleotides, and analogues	Pyrimidine nucleosides	Pyrimidine 2'-deoxyribonucleosides
neg_873	4-Hydroxybenzenesulfonic acid	6262.47	12579.2	12421.4	13828.8	10817.6	15747.5	19361.9	18689.2	15054.5	16400	11181.9	17050.6	1.52484	0.608658	0.00757577	1.77427	up	--	--	--	--	--	--	--	--	--	--	--	--
neg_875	Azamethiphos	69.255	720.965	523.895	865.725	429.322	1232.9	1714.53	1769.18	971.049	1318.3	521.832	1401.19	2.68514	1.425	0.00257362	1.85482	up	C18702	--	--	--	--	--	HMDB0248763	--	Organic compounds	Organoheterocyclic compounds	Oxazolopyridines	--
neg_881	5-Methoxytryptophan	2.85632	48.7844	22.8907	57.1288	27.7924	72.7587	145.219	177.742	89.322	120.104	31.8905	121.029	3.79515	1.92416	0.00576977	1.83598	up	--	--	--	--	--	--	HMDB0002339	2504-22-5	Organic compounds	Organoheterocyclic compounds	Indoles and derivatives	Tryptamines and derivatives
neg_970	2-Isopropylmalic acid	235.775	256.723	190.172	365.192	245.452	162.412	135.946	180.059	202.797	173.658	258.663	170.974	0.660993	-0.597292	0.0354893	1.48387	down	C02504	Valine, leucine and isoleucine biosynthesis(ko00290);;Pyruvate metabolism(ko00620);;Metabolic pathways(ko01100);;2-Oxocarboxylic acid metabolism(ko01210);;Biosynthesis of amino acids(ko01230)	--	--	--	--	HMDB0000402	49601-06-1	Organic compounds	Lipids and lipid-like molecules	Fatty Acyls	Fatty acids and conjugates
neg_971	Niridazole	591.858	594.897	444.591	854.75	587.036	406.4	287.92	420.364	466.974	406.677	614.626	397.667	0.647006	-0.628149	0.0270967	1.52984	down	C19268	--	--	--	--	--	HMDB0255625	--	Organic compounds	Organoheterocyclic compounds	Azoles	Thiazoles
neg_977	5-Phosphooxy-L-lysine	81.4921	68.4639	56.7157	126.487	82.2375	66.7506	35.9405	47.2294	54.6925	47.9211	83.0792	50.5068	0.607936	-0.718009	0.0487037	1.40642	down	C03366	Lysine degradation(ko00310);;Metabolic pathways(ko01100)	--	--	--	--	--	--	--	--	--	--
neg_978	Shikimate 3-phosphate	140.175	145.686	123.065	200.451	150.849	94.0093	85.1213	108.054	107.735	105.159	152.045	100.016	0.657803	-0.604273	0.012999	1.6887	down	C03175	Phenylalanine, tyrosine and tryptophan biosynthesis(ko00400);;Metabolic pathways(ko01100);;Biosynthesis of amino acids(ko01230)	--	--	--	--	HMDB0301781	63959-45-5	Organic compounds	Organic acids and derivatives	Organic phosphoric acids and derivatives	Phosphate esters
pos_1000	dUMP	66.1835	69.6038	50.6789	69.3507	52.5022	104.463	131.045	85.8151	110.284	126.074	61.6638	111.536	1.80878	0.855014	0.00154395	1.94462	up	C00365	Pyrimidine metabolism(ko00240);;Metabolic pathways(ko01100);;Nucleotide metabolism(ko01232);;Antifolate resistance(ko01523)	--	--	--	--	HMDB0001409	964-26-1	Organic compounds	Nucleosides, nucleotides, and analogues	Pyrimidine nucleotides	Pyrimidine deoxyribonucleotides
pos_1007	1,3-Dichloro-2-propanol	175.779	129.717	154.02	163.221	164.435	205.439	215.575	176.17	206.363	214.809	157.434	203.671	1.29369	0.371492	0.00238834	1.81973	up	C14399	--	--	--	--	--	HMDB0244163	--	Organic compounds	Organohalogen compounds	Halohydrins	Chlorohydrins
pos_10073	2-Aminoethane-1,1,1-triol	256.26	261.269	294.336	273.419	255.61	250.966	214.702	226.645	104.408	192.998	268.179	197.944	0.738104	-0.438105	0.0471296	1.48352	down	--	--	--	--	--	--	--	--	--	--	--	--
pos_10074	6-thio-dg	999.816	1085.04	966.781	900.621	954.04	947.829	714.624	811.184	381.236	698.199	981.26	710.614	0.724186	-0.465569	0.0417122	1.51786	down	--	--	--	--	--	--	--	--	--	--	--	--
pos_1021	Cyanuric acid	42.2471	57.773	36.2913	53.1943	48.1584	70.8076	76.409	63.3155	89.8516	73.7212	47.5328	74.821	1.57409	0.65452	0.0015803	1.87276	up	C06554	Metabolic pathways(ko01100)	--	--	--	--	HMDB0041861	108-80-5	Organic compounds	Organoheterocyclic compounds	Triazines	1,3,5-triazines
pos_1033	S-(3-Oxo-3-carboxy-n-propyl)cysteine	7.16159	19.0803	5.40018	14.5153	9.41005	23.7434	27.8329	23.2786	49.4656	28.2509	11.1135	30.5143	2.7457	1.45717	0.0119924	1.70068	up	--	--	--	--	--	--	HMDB0002135	87458-26-2	Organic compounds	Organic acids and derivatives	Carboxylic acids and derivatives	Amino acids, peptides, and analogues
pos_1046	4-Hydroxy-6-methyl-3-(1H-pyrazol-3-yl)-2H-pyran-2-one	62.4862	61.2899	58.6887	88.1897	53.6379	120.91	120.912	145.066	119.037	116.799	64.8585	124.545	1.92026	0.941299	7.72791e-05	2.04854	up	--	--	--	--	--	--	--	--	--	--	--	--
pos_10477	cis-3-Hexenyl b-primeveroside	176.297	114.782	138.871	146.544	144.22	132.813	81.601	67.4702	16.293	42.1846	144.143	68.0723	0.472256	-1.08236	0.013871	1.69832	down	--	--	--	--	--	--	HMDB0031690	132278-37-6	Organic compounds	Lipids and lipid-like molecules	Fatty Acyls	Fatty acyl glycosides
pos_10834	Ascorbyl stearate	321.281	322.603	315.677	302.741	261.572	268.624	228.585	249.679	55.2882	85.6649	304.775	177.568	0.582621	-0.77937	0.043779	1.53304	down	--	--	LMFA07010789	Fatty Acyls [FA]	Fatty esters [FA07]	Wax monoesters [FA0701]	HMDB0038242	10605-09-1	Organic compounds	Lipids and lipid-like molecules	Fatty Acyls	Fatty acid esters
pos_11106	Lactyltrimethylammonium betaine	261.96	283.28	245.18	250.076	239.154	209.151	226.905	209.639	126.172	163.178	255.93	187.009	0.730704	-0.452642	0.0166384	1.6739	down	--	--	--	--	--	--	HMDB0032684	68688-60-8	Organic compounds	Organometallic compounds	Organometalloid compounds	Organoarsenic compounds
pos_11107	Pyrano(2,3-c)pyrazol-6(2H)-one, 3,4-dimethyl-2-(2-thienylmethyl)-	1147.41	1276.45	1222.54	1033.79	1197.82	948.099	966.383	1031.34	533.64	745.122	1175.6	844.917	0.718711	-0.476516	0.0183713	1.65669	down	--	--	--	--	--	--	HMDB0253035	--	Organic compounds	Organoheterocyclic compounds	Pyrans	Pyranones and derivatives
pos_11108	(1R,6R)-6-Hydroxy-2-succinylcyclohexa-2,4-diene-1-carboxylate	12185.1	15866.8	12320.2	10081	13225.6	9768.11	9493.48	11054.3	6452.27	7985.67	12735.7	8950.77	0.702808	-0.508797	0.0155365	1.61312	down	C05817	Ubiquinone and other terpenoid-quinone biosynthesis(ko00130);;Metabolic pathways(ko01100);;Biosynthesis of cofactors(ko01240)	--	--	--	--	HMDB0303951	--	Organic compounds	Organic acids and derivatives	Keto acids and derivatives	Gamma-keto acids and derivatives
pos_11109	2-Amino-2-deoxyisochorismate	4593.1	5304.98	4562	3940.99	4662.4	3871.03	3675.25	3997.09	2170.52	3100.62	4612.69	3362.9	0.729054	-0.455902	0.0170703	1.62129	down	C18054	Metabolic pathways(ko01100)	--	--	--	--	--	--	--	--	--	--
pos_11111	Thymidine	9060.46	11396.4	8460.04	7336.91	9816.39	7203.15	6827.69	7650.12	3927.14	5398.85	9214.04	6201.39	0.673037	-0.571242	0.0140578	1.62178	down	C00214	Pyrimidine metabolism(ko00240);;Metabolic pathways(ko01100);;Nucleotide metabolism(ko01232)	--	--	--	--	HMDB0000273	50-89-5	Organic compounds	Nucleosides, nucleotides, and analogues	Pyrimidine nucleosides	Pyrimidine 2'-deoxyribonucleosides
pos_11113	Mopanin	8864.77	11399.9	9780.01	7447.82	9887.38	6817.15	7154.01	8522.78	3796.14	5428.09	9475.98	6343.63	0.669444	-0.578965	0.0172234	1.59702	down	--	--	LMPK12113392	Polyketides [PK]	Flavonoids [PK12]	Flavones and Flavonols [PK1211]	--	--	--	--	--	--
pos_11114	CMP	107.979	126.702	116.21	84.3284	115.871	82.5671	78.4352	91.1384	25.9087	52.0511	110.218	66.0201	0.598995	-0.739383	0.0171755	1.63649	down	C00055	Pyrimidine metabolism(ko00240);;Metabolic pathways(ko01100);;Nucleotide metabolism(ko01232)	--	--	--	--	HMDB0240312	84-52-6	Organic compounds	Organic oxygen compounds	Organooxygen compounds	Carbohydrates and carbohydrate conjugates
pos_11116	Desidustat	80111.9	100221	78141.1	68164.3	85591.2	66099.7	62605.2	71902.7	42538.1	57639.9	82445.9	60157.1	0.729655	-0.454713	0.015255	1.60527	down	--	--	--	--	--	--	HMDB0251046	--	Organic compounds	Organic acids and derivatives	Carboxylic acids and derivatives	Amino acids, peptides, and analogues
pos_11392	Alacepril	37237.5	48491.5	40278.8	27768.6	45711.3	26327.5	28708.6	35285.6	13089	20444.5	39897.5	24771	0.620867	-0.687644	0.0200492	1.56719	down	--	--	--	--	--	--	HMDB0248095	--	Organic compounds	Organic acids and derivatives	Carboxylic acids and derivatives	Amino acids, peptides, and analogues
pos_11441	Quercetin 3-O-glucoside	23828.2	32850.7	25877.1	17081.9	30301.1	17043.6	16868.9	23223.9	11413.1	14491	25987.8	16608.1	0.639073	-0.645947	0.0258903	1.54373	down	C05623	Metabolic pathways(ko01100)	--	--	--	--	HMDB0037362	482-35-9	Organic compounds	Phenylpropanoids and polyketides	Flavonoids	Flavonoid glycosides
pos_1166	Tilisolol	4.16285	10.8607	9.81723e-08	22.3673	4.56777	6.14712	108.497	39.709	73.4311	51.6372	8.39172	55.8843	6.65946	2.7354	0.0480612	1.52266	up	--	--	--	--	--	--	HMDB0259093	--	Organic compounds	Organoheterocyclic compounds	Isoquinolines and derivatives	Isoquinolones and derivatives
pos_1172	Norsalsolinol	599.32	596.325	481.914	712.271	617.695	405.415	427.918	392.739	449.648	440.676	601.505	423.279	0.7037	-0.506967	0.00650633	1.81866	down	--	--	--	--	--	--	HMDB0006044	34827-33-3	Organic compounds	Organoheterocyclic compounds	Tetrahydroisoquinolines	--
pos_11722	Sibenadet	7485.36	9096.02	7424.62	5130.26	8478.82	5115.34	4855.33	6385.59	2950.08	4044.61	7523.01	4670.19	0.620787	-0.68783	0.0125964	1.65381	down	--	--	--	--	--	--	HMDB0258285	--	Organic compounds	Organoheterocyclic compounds	Benzothiazoles	--
pos_1173	2-Ethyl-4-hydroxy-5-methyl-3(2H)-furanone	2128.78	1670.41	1548.49	1970.76	1868.85	800.993	1388.17	1228.01	1336.48	1179.74	1837.46	1186.68	0.645828	-0.630778	0.00215198	1.82184	down	--	--	--	--	--	--	HMDB0303906	--	Organic compounds	Organoheterocyclic compounds	Dihydrofurans	Furanones
pos_1174	Isoquinoline N-oxide	16137.2	12487.7	12524.7	14652.1	14761.7	6340.55	11242.2	10293.4	10511	10142.2	14112.7	9705.87	0.687741	-0.540063	0.00454515	1.75479	down	--	--	--	--	--	--	--	--	--	--	--	--
pos_1175	3h-Serotonin	1556.11	1178.68	1135.14	1346.03	1334.27	549.442	973.294	867.713	934.684	830.447	1310.05	831.116	0.634417	-0.656496	0.00188234	1.84124	down	--	--	--	--	--	--	--	--	--	--	--	--
pos_1176	Indoleacrylic acid	137267	104928	117966	125611	130925	67053.6	106083	98757.2	100817	101604	123339	94862.9	0.769121	-0.378718	0.0142154	1.60774	down	--	--	--	--	--	--	HMDB0000734	29953-71-7	Organic compounds	Organoheterocyclic compounds	Indoles and derivatives	Indoles
pos_1179	N-Acetyl-L-glutamate	336.113	254.14	239.714	302.36	283.508	115.831	195.202	177.355	203.016	173.051	283.167	172.891	0.610562	-0.71179	0.00141776	1.86467	down	C00624	Arginine biosynthesis(ko00220);;D-Amino acid metabolism(ko00470);;Metabolic pathways(ko01100);;2-Oxocarboxylic acid metabolism(ko01210);;Biosynthesis of amino acids(ko01230)	--	--	--	--	HMDB0001138	1188-37-0	Organic compounds	Organic acids and derivatives	Carboxylic acids and derivatives	Amino acids, peptides, and analogues
pos_1181	Carbamazepine-o-quinone	1610.99	958.012	1120.82	1103.83	1196.95	510.52	968.049	849.612	871.66	802.588	1198.12	800.486	0.668118	-0.581826	0.0207361	1.58872	down	C16606	Drug metabolism - cytochrome P450(ko00982)	--	--	--	--	HMDB0060566	--	Organic compounds	Organoheterocyclic compounds	Benzazepines	Dibenzazepines
pos_1182	5-(4-Carboxybutylperoxy)pentanoic acid	15.8215	8.35008	11.3006	9.01257	13.9967	1.52275	9.71451	4.87458	9.59517	3.57884	11.6963	5.85717	0.500771	-0.997777	0.0282181	1.5278	down	--	--	--	--	--	--	--	--	--	--	--	--
pos_1188	CMP-2-aminoethylphosphonate	16.5679	3.7628	6.89337	5.17789	11.7571	9.81723e-08	5.78132	2.50195	0.650837	9.81723e-08	8.83182	1.78682	0.202316	-2.30532	0.0373262	1.53608	down	C05673	Phosphonate and phosphinate metabolism(ko00440);;Metabolic pathways(ko01100)	--	--	--	--	HMDB0060067	--	Organic compounds	Organic oxygen compounds	Organooxygen compounds	Carbohydrates and carbohydrate conjugates
pos_1190	[(2R,3S,4S,5R,6S)-3,4,5-trihydroxy-6-[(E)-3-phenylprop-2-enoyl]oxyoxan-2-yl]methyl 3,4-dihydroxy-2-methylidenebutanoate	325.811	151.28	169.3	148.186	190.094	25.2095	129.712	105.366	105.603	78.257	196.934	88.8295	0.451062	-1.1486	0.027442	1.58151	down	--	--	--	--	--	--	--	--	--	--	--	--
pos_12215	floctafenine	40744.1	34857.5	37228.4	30523.5	35424.2	26229.1	27552.8	28302.2	19485.4	25979.2	35755.5	25509.8	0.713449	-0.487118	0.00205958	1.86009	down	--	--	--	--	--	--	HMDB0252310	--	Organic compounds	Organoheterocyclic compounds	Quinolines and derivatives	Aminoquinolines and derivatives
pos_12225	2,2,4,4,6,6-Hexamethyl-1,3,5-trithiane	22884.6	18822	20621.3	15492	19177.4	13048.4	14095.8	14996.2	9869.37	13141.5	19399.5	13030.3	0.671681	-0.574151	0.00337664	1.84191	down	--	--	--	--	--	--	HMDB0040243	828-26-2	Organic compounds	Organosulfur compounds	Thioacetals	Dithioacetals
pos_12226	N3-Fumaroyl-L-2,3-diaminopropanoate	538.768	477.828	504.42	434.194	462.925	393.806	393.159	402.592	301.757	394.259	483.627	377.115	0.779764	-0.358891	0.00349022	1.80655	down	C20961	Metabolic pathways(ko01100)	--	--	--	--	--	--	--	--	--	--
pos_12227	Deoxythioguanosine	2014.68	1637.02	1737.66	1504.61	1602.96	1324.31	1350.3	1325.48	1014.38	1268.77	1699.39	1256.65	0.739471	-0.435435	0.00407147	1.82118	down	--	--	--	--	--	--	--	--	--	--	--	--
pos_12228	(2R,3R,4S,5R)-5-Fluoro-2,3,4-trihydroxy-6-oxohexyl dihydrogen phosphate	263.232	231.075	231.384	173.023	208.075	148.034	158.977	174.519	87.0161	130.319	221.357	139.773	0.631436	-0.663292	0.00487351	1.77851	down	--	--	--	--	--	--	--	--	--	--	--	--
pos_12234	Grixazone B	83.0507	59.8761	78.3575	51.0174	75.7471	49.7504	43.7456	57.225	23.9739	46.2585	69.6098	44.1907	0.634834	-0.655548	0.0149288	1.63247	down	C20799	Metabolic pathways(ko01100)	--	--	--	--	--	--	--	--	--	--
pos_12236	Lipoyl-AMP	1244.28	897.17	1033.31	663.486	936.379	535.544	582.517	711.688	419.025	582.135	954.925	566.182	0.592907	-0.754122	0.0106996	1.76151	down	C16238	Lipoic acid metabolism(ko00785);;Metabolic pathways(ko01100)	--	--	--	--	HMDB0059635	--	Organic compounds	Nucleosides, nucleotides, and analogues	Purine nucleotides	Purine ribonucleotides
pos_12395	Cytidine monophosphate	46.3577	28.7446	29.4396	28.4662	27.8847	22.552	20.9726	22.0963	10.3483	10.6808	32.1785	17.33	0.538558	-0.892827	0.0119835	1.68107	down	--	--	--	--	--	--	HMDB0000095	63-37-6	Organic compounds	Nucleosides, nucleotides, and analogues	Pyrimidine nucleotides	Pyrimidine ribonucleotides
pos_1263	UDP-glucuronate	109.857	84.4023	120.737	99.3606	116.786	90.574	59.2702	79.1126	83.2958	85.1394	106.229	79.4784	0.748182	-0.41854	0.0141378	1.63967	down	C00167	Pentose and glucuronate interconversions(ko00040);;Ascorbate and aldarate metabolism(ko00053);;Amino sugar and nucleotide sugar metabolism(ko00520);;Metabolic pathways(ko01100);;Biosynthesis of cofactors(ko01240);;Biosynthesis of nucleotide sugars(ko01250)	--	--	--	--	HMDB0000935	2616-64-0	Organic compounds	Organoheterocyclic compounds	Lactones	Gamma butyrolactones
pos_1356	N-acetyl zonisamide	7.3202	6.99721	1.44923	25.6681	7.68292	36.8628	44.4208	45.8303	9.04186	32.4424	9.82353	33.7196	3.43254	1.77928	0.0194643	1.63418	up	--	--	--	--	--	--	HMDB0060603	68936-43-6	Organic compounds	Organoheterocyclic compounds	Benzisoxazoles	--
pos_1375	2-epi-5-epi-Valiolone 7-phosphate	17.0598	49.9746	45.6268	66.0825	42.8493	91.7186	109.166	128.035	79.9195	109.489	44.3186	103.666	2.3391	1.22595	0.000839474	1.94523	up	C17692	Metabolic pathways(ko01100)	--	--	--	--	--	--	--	--	--	--
pos_1376	alpha-D-Sedoheptulopyranose 7-phosphate	10.781	17.5112	14.3841	23.0397	11.7679	32.9249	33.801	38.5244	28.4026	36.85	15.4968	34.1006	2.2005	1.13783	0.000216699	2.02891	up	C20956	Metabolic pathways(ko01100)	--	--	--	--	HMDB0001068	89927-08-2	Organic compounds	Organic oxygen compounds	Organooxygen compounds	Carbohydrates and carbohydrate conjugates
pos_1460	Eremopetasitenin C1	30.9507	29.0567	30.9998	37.0286	30.6766	18.1981	13.7114	30.5553	24.1142	25.3731	31.7425	22.3904	0.705378	-0.503532	0.0294128	1.52081	down	--	--	--	--	--	--	HMDB0032770	--	Organic compounds	Lipids and lipid-like molecules	Prenol lipids	Terpene lactones
pos_1602	Apramycin	59.7969	141.674	40.5471	119.721	99.4755	70.7462	257.16	291.156	233.722	214.808	92.2428	213.518	2.31474	1.21085	0.029319	1.58016	up	C01555	Neomycin, kanamycin and gentamicin biosynthesis(ko00524)	--	--	--	--	HMDB0248529	--	Organic compounds	Organic oxygen compounds	Organooxygen compounds	Carbohydrates and carbohydrate conjugates
pos_1633	(2R,3R,4S,5S,6R)-2-[1,7-bis(4-hydroxyphenyl)heptan-3-yloxy]-6-[[(2S,3R,4R)-3,4-dihydroxy-4-(hydroxymethyl)oxolan-2-yl]oxymethyl]oxane-3,4,5-triol	4.89451	20.8105	9.81723e-08	11.2388	6.86431	5.12701	28.8023	27.6396	24.4052	23.1981	8.76163	21.8345	2.49206	1.31734	0.0475679	1.42445	up	--	--	--	--	--	--	--	--	--	--	--	--
pos_1693	Verruculogen	13.0276	22.5946	1.67172	25.0454	21.2398	12.9896	56.1543	39.5589	43.769	42.882	16.7158	39.0708	2.33735	1.22488	0.0327221	1.53873	up	C20045	Metabolic pathways(ko01100)	--	--	--	--	--	--	--	--	--	--
pos_1702	Hydrocortisone succinate	90.5979	159.24	80.8691	127.359	115.672	109.81	258.441	199.747	236.511	218.138	114.748	204.529	1.78243	0.833845	0.0208526	1.62858	up	C12888	--	LMST02030126	Sterol Lipids [ST]	Steroids [ST02]	C21 steroids (gluco/mineralocorticoids, progestogins) and derivatives [ST0203]	--	--	--	--	--	--
pos_1714	Gly-Trp-Gly	0.964502	4.96284	9.81723e-08	4.70334	2.29012	3.58932	13.078	19.5275	12.4717	5.7974	2.58416	10.8928	4.21521	2.07561	0.0400069	1.53214	up	--	--	--	--	--	--	--	--	--	--	--	--
pos_1725	Prunasin	0.788285	3.73452	9.81723e-08	3.81411	2.65509	6.40646	3.82281	11.5949	4.36664	12.6872	2.1984	7.7756	3.53694	1.8225	0.0354789	1.57294	up	C00844	Metabolic pathways(ko01100)	--	--	--	--	HMDB0034934	99-18-3	Organic compounds	Organic oxygen compounds	Organooxygen compounds	Carbohydrates and carbohydrate conjugates
pos_1755	Melibiitol	1.70278	36.9423	12.0505	27.9672	18.0847	15.9683	67.7698	79.7459	80.6785	55.8037	19.3495	59.9933	3.10051	1.6325	0.0230227	1.61425	up	C05399	Galactose metabolism(ko00052)	--	--	--	--	HMDB0006791	--	Organic compounds	Lipids and lipid-like molecules	Fatty Acyls	Fatty acyl glycosides
pos_1916	Timolol	16.1967	11.0265	2.15674	22.7887	15.2174	78.0796	98.849	26.9585	62.303	65.0587	13.4772	66.2498	4.91568	2.29739	0.0089125	1.81935	up	C07141	--	--	--	--	--	HMDB0014517	26839-75-8	Organic compounds	Organic nitrogen compounds	Organonitrogen compounds	Amines
pos_1920	Carmofur	9.81723e-08	7.28264	10.3398	29.1382	9.76243	39.327	41.0285	57.9199	22.1606	36.4347	11.3046	39.3742	3.48301	1.80034	0.00586001	1.7746	up	C13252	Drug metabolism - other enzymes(ko00983)	--	--	--	--	HMDB0249685	--	Organic compounds	Organoheterocyclic compounds	Diazines	Pyrimidines and pyrimidine derivatives
pos_2070	Sphinganine 1-phosphate	14.1488	21.5911	11.0148	23.0178	34.4876	3.41109	1.7021	17.2538	3.26442	4.20137	20.852	5.96656	0.286138	-1.80522	0.0196915	1.54582	down	C01120	Sphingolipid metabolism(ko00600);;Metabolic pathways(ko01100);;Neuroactive ligand-receptor interaction(ko04080)	--	--	--	--	HMDB0001383	19794-97-9	Organic compounds	Lipids and lipid-like molecules	Sphingolipids	Phosphosphingolipids
pos_2158	20-Hydroxyleukotriene E4	1.51676	4.79297	9.81723e-08	26.6062	4.81604	63.0672	57.1347	5.37661	32.5492	46.8341	7.54639	40.9924	5.43205	2.4415	0.0276986	1.58507	up	C03577	Arachidonic acid metabolism(ko00590)	--	--	--	--	--	--	--	--	--	--
pos_2173	6,7-Didehydrofevicordin F 3-[glucosyl-(1->6)-glucoside]	9.81723e-08	9.81723e-08	9.81723e-08	12.1592	9.81723e-08	48.8035	78.2701	23.3539	19.9711	24.2594	2.43183	38.9316	16.0092	4.00083	0.0285137	1.63577	up	--	--	--	--	--	--	HMDB0036337	178062-90-3	Organic compounds	Lipids and lipid-like molecules	Steroids and steroid derivatives	Steroidal glycosides
pos_2181	Aeruginosin 98-B	0.522789	9.81723e-08	9.81723e-08	6.73836	9.81723e-08	41.3506	27.0712	19.4177	12.876	53.8665	1.45223	30.9164	21.2889	4.41203	0.0156384	1.78396	up	--	--	--	--	--	--	--	--	--	--	--	--
pos_2203	Retinoyl-AZT	36.7325	31.5047	19.7342	11.2105	26.1997	27.804	52.8497	75.5698	40.2696	51.7019	25.0763	49.639	1.97952	0.985148	0.0336554	1.49358	up	--	--	--	--	--	--	HMDB0257175	--	Organic compounds	Lipids and lipid-like molecules	Prenol lipids	Retinoids
pos_2215	Levanbiose	9.81723e-08	4.35937	9.81723e-08	7.22115	3.4456	1.10773	13.9695	13.1905	10.7279	22.0796	3.00522	12.215	4.0646	2.02311	0.049777	1.50901	up	C01725	Starch and sucrose metabolism(ko00500)	--	--	--	--	--	--	--	--	--	--
pos_4789	Coenzyme F420	105.647	63.3898	55.7468	66.7355	61.1106	94.7119	144.231	164.012	208.084	182.574	70.5259	158.723	2.25056	1.17028	0.00665215	1.79331	up	C00876	Metabolic pathways(ko01100);;Biosynthesis of cofactors(ko01240)	--	--	--	--	--	--	--	--	--	--
pos_5000	Traumatic acid	9.36535	4.52803	9.81723e-08	13.3586	9.81723e-08	6.78905	55.086	40.3081	47.1049	56.0286	5.45039	41.0633	7.53401	2.91342	0.0145435	1.76628	up	C16308	alpha-Linolenic acid metabolism(ko00592)	LMFA01170002	Fatty Acyls [FA]	Fatty Acids and Conjugates [FA01]	Dicarboxylic acids [FA0117]	HMDB0000933	6402-36-4	Organic compounds	Lipids and lipid-like molecules	Fatty Acyls	Fatty acids and conjugates
pos_5473	Deoxyguanidinoproclavaminic acid	17.5586	8.43225	23.5751	13.038	14.9977	8.83551	4.23233	10.1143	7.11365	8.28634	15.5203	7.71643	0.497182	-1.00815	0.0323134	1.58236	down	C06656	Metabolic pathways(ko01100)	--	--	--	--	--	--	--	--	--	--
pos_5555	3-Amino-4-(3-hexylphenylamino)-4-oxobutylphosphonic acid	9.10221	70.6035	36.8958	18.8012	36.2657	18.3389	4.81684	9.81723e-08	9.81723e-08	9.81723e-08	34.3337	4.63115	0.134886	-2.89018	0.0446741	1.49547	down	--	--	--	--	--	--	HMDB0258163	--	Organic compounds	Organic acids and derivatives	Carboxylic acids and derivatives	Amino acids, peptides, and analogues
pos_5617	Versicotide C	25.3963	20.5768	14.1698	9.81723e-08	19.1741	4.51311	3.66212	9.81723e-08	11.1568	9.81723e-08	15.8634	3.86641	0.243731	-2.03664	0.0489898	1.50369	down	--	--	--	--	--	--	--	--	--	--	--	--
pos_5642	Urocortisol	40.296	77.9618	50.6694	120.685	86.0948	178.257	126.333	314.45	260.049	242.365	75.1414	224.291	2.98491	1.57769	0.00718615	1.82076	up	C05472	Steroid hormone biosynthesis(ko00140)	LMST02030143	Sterol Lipids [ST]	Steroids [ST02]	C21 steroids (gluco/mineralocorticoids, progestogins) and derivatives [ST0203]	HMDB0000949	1953-02-01	Organic compounds	Lipids and lipid-like molecules	Steroids and steroid derivatives	Hydroxysteroids
pos_6255	1,2-dihydroxyheptadec-16-yn-4-yl acetate	509.717	728.372	431.359	1061.58	709.469	1006.67	1036.35	1642.07	2188.09	1705.29	688.1	1515.69	2.20272	1.13929	0.0164482	1.68079	up	--	--	LMFA05000645	Fatty Acyls [FA]	Fatty alcohols [FA05]	-	HMDB0031049	28884-46-0	Organic compounds	Lipids and lipid-like molecules	Fatty Acyls	Fatty alcohols
pos_6262	Chenodeoxycholate	12.002	17.099	5.88216	18.7501	14.1457	21.0953	20.712	25.0155	41.3055	26.4257	13.5758	26.9108	1.98227	0.98715	0.0204662	1.60183	up	C02528	Primary bile acid biosynthesis(ko00120);;Metabolic pathways(ko01100);;Bile secretion(ko04976)	--	--	--	--	HMDB0000518	474-25-9	Organic compounds	Lipids and lipid-like molecules	Steroids and steroid derivatives	Bile acids, alcohols and derivatives
pos_6303	6-Keto-prostaglandin E1	80.5667	38.8377	55.3481	46.4851	46.3882	47.1897	37.4848	36.1047	1.31754	19.5451	53.5252	28.3284	0.529253	-0.917969	0.0492297	1.40962	down	C05962	Arachidonic acid metabolism(ko00590);;Metabolic pathways(ko01100)	--	--	--	--	HMDB0004241	67786-53-2	Organic compounds	Lipids and lipid-like molecules	Fatty Acyls	Eicosanoids
pos_6394	N-Oleoylglycine	257.636	213.223	227.705	262.269	242.381	393.084	367.048	366.048	383.58	388.852	240.643	379.723	1.57795	0.658053	6.03596e-06	2.12265	up	--	--	--	--	--	--	HMDB0013631	2601-90-3	Organic compounds	Organic acids and derivatives	Carboxylic acids and derivatives	Amino acids, peptides, and analogues
pos_6395	N-Arachidonyl dopamine	15.4336	19.8648	15.4287	7.75192	9.53519	26.6367	16.0372	21.4692	26.2413	22.2418	13.6028	22.5252	1.65592	0.727635	0.0160501	1.54781	up	--	--	--	--	--	--	--	--	--	--	--	--
pos_6433	N6-(L-1,3-Dicarboxypropyl)-L-lysine	18.0728	36.5081	24.0483	76.4414	44.4395	109.246	55.6648	95.398	62.4263	95.8484	39.902	83.7166	2.09806	1.06905	0.0171207	1.62604	up	C00449	Lysine biosynthesis(ko00300);;Lysine degradation(ko00310);;Metabolic pathways(ko01100);;Biosynthesis of amino acids(ko01230)	--	--	--	--	HMDB0000279	997-68-2	Organic compounds	Organic acids and derivatives	Carboxylic acids and derivatives	Amino acids, peptides, and analogues
pos_6477	delta-Tocotrienol	47.3465	90.8416	57.5082	132.763	79.2982	131.157	169.444	380.91	410.342	300.341	81.5514	278.439	3.41427	1.77158	0.0217592	1.68944	up	C14156	Ubiquinone and other terpenoid-quinone biosynthesis(ko00130);;Metabolic pathways(ko01100)	LMPR02020056	Prenol Lipids [PR]	Quinones and hydroquinones [PR02]	Vitamin E [PR0202]	HMDB0030008	25612-59-3	Organic compounds	Lipids and lipid-like molecules	Prenol lipids	Quinone and hydroquinone lipids
pos_6588	7-Sulfocholic acid	186.422	145.789	292.581	244.604	223.001	161.778	14.6642	167.202	35.3634	37.4326	218.48	83.288	0.381217	-1.39132	0.0131706	1.64011	down	--	--	LMST05020039	Sterol Lipids [ST]	Steroid conjugates [ST05]	Sulfates [ST0502]	HMDB0002421	60320-05-0	Organic compounds	Lipids and lipid-like molecules	Steroids and steroid derivatives	Bile acids, alcohols and derivatives
pos_668	PS(20:5(5Z,8Z,11Z,14Z,17Z)/22:6(5Z,7Z,10Z,13Z,16Z,19Z)-OH(4))	39.0551	38.3392	31.1841	31.6399	31.7019	44.0741	44.6592	53.5323	49.5848	47.2347	34.384	47.817	1.39068	0.475785	0.000626352	1.91084	up	--	--	--	--	--	--	HMDB0282849	--	--	--	--	--
pos_669	PA(16:1(9Z)/LTE4)	35.5931	27.3317	28.622	36.7166	23.6917	51.8723	49.6449	60.2407	58.2989	58.0983	30.391	55.631	1.83051	0.872244	6.3168e-05	2.04709	up	--	--	--	--	--	--	HMDB0263404	--	--	--	--	--
pos_6730	Cholic Acid, Methyl Ester	117.326	175.27	121.985	209.772	152.208	228.01	295.916	488.088	617.17	402.21	155.312	406.279	2.61589	1.3873	0.0199612	1.70378	up	--	--	--	--	--	--	--	--	--	--	--	--
pos_6792	3-Hydroxy-9-hexadecenoylcarnitine	641.444	942.382	595.436	1565.11	897.883	1579.5	1568.19	2979.41	3261.58	2439.41	928.451	2365.62	2.54792	1.34932	0.0107008	1.7452	up	--	--	--	--	--	--	HMDB0013333	--	Organic compounds	Lipids and lipid-like molecules	Fatty Acyls	Fatty acid esters
pos_685	N-Acetylhistidine	134.996	97.2087	99.9541	142.39	123.081	93.6673	76.9877	73.2266	96.1202	88.1255	119.526	85.6255	0.716376	-0.48121	0.0162351	1.64241	down	--	--	--	--	--	--	HMDB0032055	2497-02-01	Organic compounds	Organic acids and derivatives	Carboxylic acids and derivatives	Amino acids, peptides, and analogues
pos_6988	Morinidazole	1.27451	1.75579	9.81723e-08	9.88522	2.04838	9.63695	17.989	8.85885	7.38721	11.6293	2.99278	11.1003	3.70902	1.89104	0.0131694	1.66905	up	--	--	--	--	--	--	HMDB0254886	--	Organic compounds	Organoheterocyclic compounds	Azoles	Imidazoles
pos_7049	(±)-Myristoylcarnitine	2820.89	3543.42	2601.16	5060.44	3648.75	5966.03	7866.54	12025.4	11135.2	9855.31	3534.93	9369.69	2.6506	1.40632	0.00390434	1.90506	up	--	--	--	--	--	--	--	--	--	--	--	--
pos_7088	Citrinin	11.4398	10.8268	22.4215	24.702	20.0631	11.198	9.81723e-08	16.8932	2.32898	4.31134	17.8906	6.94631	0.388265	-1.36489	0.0322271	1.44253	down	C16765	--	--	--	--	--	HMDB0041857	518-75-2	Organic compounds	Organoheterocyclic compounds	Benzopyrans	--
pos_7134	Casokefamide	356.751	433.91	480.776	668.924	468.87	323.562	9.81723e-08	461.383	230.329	264.987	481.846	256.052	0.531398	-0.912135	0.0419996	1.39471	down	--	--	--	--	--	--	HMDB0249695	--	Organic compounds	Organic acids and derivatives	Carboxylic acids and derivatives	Amino acids, peptides, and analogues
pos_7168	Avizafone	161.708	115.376	131.366	239.444	184.304	95.3958	9.81723e-08	150.127	52.6692	38.225	166.44	67.2834	0.404251	-1.30668	0.0192579	1.54094	down	C11725	--	--	--	--	--	HMDB0248745	--	Organic compounds	Organic acids and derivatives	Carboxylic acids and derivatives	Amino acids, peptides, and analogues
pos_7169	Precorrin 6Y	149.38	187.888	245.831	281.508	205.879	104.574	9.81723e-08	209.949	46.2298	43.4683	214.097	80.8442	0.377605	-1.40505	0.018043	1.58236	down	C06319	Porphyrin metabolism(ko00860);;Metabolic pathways(ko01100);;Biosynthesis of cofactors(ko01240)	--	--	--	--	--	--	--	--	--	--
pos_7173	Sialyllacto-N-tetraose a	60.8765	55.2378	92.6139	77.7822	69.8953	41.6883	9.81723e-08	75.7756	9.76701	9.81723e-08	71.2811	25.4462	0.356983	-1.48607	0.0322582	1.54447	down	--	--	--	--	--	--	HMDB0006589	64003-53-8	Organic compounds	Organic oxygen compounds	Organooxygen compounds	Carbohydrates and carbohydrate conjugates
pos_7177	3-Dehydroshikimate	4.87109	4.54776	7.53588	3.9565	2.76109	4.54996	0.51448	1.71518	0.67498	9.81723e-08	4.73447	1.49092	0.314908	-1.667	0.0210435	1.58372	down	C02637	Phenylalanine, tyrosine and tryptophan biosynthesis(ko00400);;Metabolic pathways(ko01100);;Biosynthesis of amino acids(ko01230);;Biosynthesis of cofactors(ko01240)	--	--	--	--	HMDB0304122	--	Organic compounds	Organic oxygen compounds	Organooxygen compounds	Carbonyl compounds
pos_7178	Dodecylbenzene	1149	1035.63	1188.83	1094.48	1132.16	2124.12	2147.42	2199.99	2463.89	2441.81	1120.02	2275.45	2.03161	1.02263	2.60164e-05	2.13052	up	--	--	--	--	--	--	HMDB0251572	--	Organic compounds	Benzenoids	Benzene and substituted derivatives	--
pos_7179	9-Oxononanoic acid	106.13	85.3345	109.949	89.2572	92.69	170.915	206.76	164.773	177.758	171.862	96.672	178.413	1.84556	0.884055	3.87803e-05	2.06384	up	C16322	alpha-Linolenic acid metabolism(ko00592)	--	--	--	--	HMDB0094711	--	Organic compounds	Lipids and lipid-like molecules	Fatty Acyls	Fatty acids and conjugates
pos_7183	cis-2,3-Dihydro-2,3-dihydroxybiphenyl	19.0288	14.401	25.8373	16.9252	29.3557	37.1903	50.7954	43.1141	25.6829	45.8943	21.1096	40.5354	1.92024	0.941283	0.00719012	1.74927	up	C06589	Metabolic pathways(ko01100)	--	--	--	--	--	--	--	--	--	--
pos_7184	Sphingosine-1-phosphate	2672.37	2163.44	2575.71	2225.28	2425.18	4908.54	6202.08	4415.5	4558.31	5096.34	2412.39	5036.16	2.08762	1.06186	0.000638906	2.04104	up	--	--	LMSP01050001	Sphingolipids [SP]	Sphingoid bases [SP01]	Sphingoid base 1-phosphates [SP0105]	HMDB0000277	26993-30-6	Organic compounds	Lipids and lipid-like molecules	Sphingolipids	Phosphosphingolipids
pos_7307	delta-Dodecalactone	14.296	22.5863	20.4822	35.3801	23.3983	66.7556	31.4012	56.8254	31.912	48.9336	23.2286	47.1656	2.0305	1.02183	0.0219897	1.62734	up	--	--	LMFA07040040	Fatty Acyls [FA]	Fatty esters [FA07]	Lactones [FA0704]	HMDB0037742	3051-22-7	Organic compounds	Organoheterocyclic compounds	Lactones	Delta valerolactones
pos_7311	(2S)-2-Hydroxyhexadecanoylcarnitine	4576.17	6326.93	3591.68	9252.62	6145.74	10129.5	8936.97	14998.6	9225.93	9875.36	5978.63	10633.3	1.77855	0.830701	0.0136608	1.65905	up	--	--	--	--	--	--	HMDB0241459	--	Organic compounds	Lipids and lipid-like molecules	Fatty Acyls	Fatty acid esters
pos_733	5-Hydroxymethyluridine	5.9241	14.0137	9.81723e-08	7.67963	9.01609	19.8942	119.64	47.005	53.6627	49.2703	7.3267	57.8945	7.90185	2.98219	0.0369622	1.59826	up	--	--	--	--	--	--	--	--	--	--	--	--
pos_7441	7alpha,27-Dihydroxycholesterol	33.9741	29.8922	4.74567	19.6309	20.6378	9.81723e-08	9.81723e-08	1.45186	11.6614	2.32978	21.7761	3.08861	0.141835	-2.81772	0.0169497	1.67858	down	C06341	Primary bile acid biosynthesis(ko00120)	LMST04030081	Sterol Lipids [ST]	Bile acids and derivatives [ST04]	C27 bile acids, alcohols, and derivatives [ST0403]	HMDB0006281	4725-24-0	Organic compounds	Lipids and lipid-like molecules	Steroids and steroid derivatives	Bile acids, alcohols and derivatives
pos_7442	(9Z,12Z,15Z)-3-Hydroxyoctadecatrienoylcarnitine	1047.73	749.317	842.996	882.302	900.901	433.599	488.5	639.445	548.405	524.433	884.65	526.876	0.595576	-0.747642	0.00047159	1.97298	down	--	--	LMFA07070027	Fatty Acyls [FA]	Fatty esters [FA07]	Fatty acyl carnitines [FA0707]	HMDB0240763	--	Organic compounds	Lipids and lipid-like molecules	Fatty Acyls	Fatty acid esters
pos_7462	6'''-Deamino-6'''-oxoparomomycin II	83.7974	115.949	67.0178	121.487	92.167	96.0205	68.48	52.5142	9.81723e-08	17.8103	96.0837	46.965	0.488793	-1.0327	0.0466038	1.40377	down	C21263	Neomycin, kanamycin and gentamicin biosynthesis(ko00524)	--	--	--	--	--	--	--	--	--	--
pos_7511	1-(3-Carboxypropylcarbamoyl)-5-fluorouracil	145.679	101.372	151.781	141.076	156.799	127.462	111.02	119.572	68.9566	100.412	139.342	105.484	0.75702	-0.401596	0.0439444	1.40341	down	--	--	--	--	--	--	HMDB0243786	--	Organic compounds	Organic acids and derivatives	Carboxylic acids and derivatives	Amino acids, peptides, and analogues
pos_7513	trp-gly	442.988	302.229	417.782	526.46	464.635	290.185	266.014	318.532	249.315	298.896	430.819	284.588	0.660576	-0.598205	0.0137148	1.70729	down	--	--	--	--	--	--	HMDB0029083	--	Organic compounds	Organic acids and derivatives	Carboxylic acids and derivatives	Amino acids, peptides, and analogues
pos_7517	3-Hydroxy-11Z-octadecenoylcarnitine	18.6082	22.0782	12.2668	26.215	25.1257	19.5096	10.7381	11.6821	9.81723e-08	9.81723e-08	20.8588	8.38596	0.402035	-1.31461	0.0280086	1.50257	down	--	--	--	--	--	--	HMDB0013339	--	Organic compounds	Lipids and lipid-like molecules	Fatty Acyls	Fatty acid esters
pos_7538	Ruboxistaurin	429.669	333.347	487.451	693.875	514.897	326.881	184.825	293.554	231.209	268.399	491.848	260.974	0.530599	-0.914307	0.0139592	1.66908	down	--	--	--	--	--	--	HMDB0257357	--	Organic compounds	Phenylpropanoids and polyketides	Macrolactams	--
pos_7539	PC(18:3(6Z,9Z,12Z)/0:0)[U]	176431	142310	167445	226525	190969	136965	118034	134238	117644	133960	180736	128168	0.709146	-0.495845	0.0168177	1.66891	down	--	--	--	--	--	--	--	--	--	--	--	--
pos_7542	(3Z)-Phytochromobilin	1586.41	1084.68	1381.56	1704.74	1494.44	972.138	890.577	973.189	618.305	799.279	1450.37	850.698	0.58654	-0.769699	0.00218529	1.85654	down	C05913	Porphyrin metabolism(ko00860)	--	--	--	--	HMDB0303975	--	Organic compounds	Organoheterocyclic compounds	Tetrapyrroles and derivatives	Bilirubins
pos_7559	Guanidinoacetate	83.5372	68.3109	92.5481	94.9258	82.981	84.8136	53.047	63.1657	40.7767	54.9248	84.4606	59.3456	0.702642	-0.509138	0.0238758	1.54954	down	C00581	Glycine, serine and threonine metabolism(ko00260);;Arginine and proline metabolism(ko00330);;Metabolic pathways(ko01100)	--	--	--	--	HMDB0000128	352-97-6	Organic compounds	Organic acids and derivatives	Carboxylic acids and derivatives	Amino acids, peptides, and analogues
pos_7582	Glu Gly Met Phe	128.795	127.764	157.72	127.55	127.635	132.641	77.0435	75.3282	63.5133	59.2829	133.893	81.5617	0.609157	-0.715114	0.0127799	1.73542	down	--	--	--	--	--	--	--	--	--	--	--	--
pos_759	METHACHOLINE	20077.5	21421.5	17027.3	19774.5	21431	26284.8	19126.7	24395.5	22837.6	26451	19946.4	23819.1	1.19416	0.255994	0.0454069	1.44083	up	C07471	--	--	--	--	--	HMDB0015654	55-92-5	Organic compounds	Organic nitrogen compounds	Organonitrogen compounds	Quaternary ammonium salts
pos_7605	phe-ile-gly	42.6216	38.2912	79.0574	100.07	67.8463	30.1619	14.9583	33.5992	4.3568	15.2713	65.5774	19.6695	0.299943	-1.73724	0.0123234	1.67369	down	--	--	--	--	--	--	--	--	--	--	--	--
pos_7615	Pedein B	65.3934	65.0964	116.012	112.928	88.9661	73.3823	25.4037	36.3488	9.81723e-08	9.81723e-08	89.6792	27.027	0.301374	-1.73037	0.00771411	1.69917	down	--	--	--	--	--	--	--	--	--	--	--	--
pos_7672	Lucidenic acid D1	49.3828	23.156	49.0918	33.5713	52.3139	30.2533	23.9812	12.1572	14.9012	12.6902	41.5032	18.7966	0.452896	-1.14275	0.0120271	1.70427	down	--	--	--	--	--	--	HMDB0038199	97653-95-7	Organic compounds	Lipids and lipid-like molecules	Prenol lipids	Triterpenoids
pos_778	2-Pyrone-4,6-dicarboxylate	7.33367	10.2479	9.36552	11.6004	12.9292	21.3424	27.6877	9.90313	21.1591	23.9846	10.2953	20.8154	2.02183	1.01566	0.0210788	1.67904	up	C03671	Metabolic pathways(ko01100)	--	--	--	--	--	--	--	--	--	--
pos_781	Uric acid	1505.94	686.175	1411.6	2209.61	1545.11	4114.06	3509.28	2626.92	2259.44	3335.48	1471.69	3169.04	2.15334	1.10657	0.00380558	1.81118	up	C00366	Purine metabolism(ko00230);;Metabolic pathways(ko01100);;Bile secretion(ko04976)	--	--	--	--	HMDB0000289	69-93-2	Organic compounds	Organoheterocyclic compounds	Imidazopyrimidines	Purines and purine derivatives
pos_787	(S)-Chiral alcohol	30.2033	32.5128	32.0161	34.1604	31.1375	40.4737	33.272	37.1591	39.3085	33.2804	32.006	36.6987	1.14662	0.197387	0.0312931	1.53393	up	C18354	Metabolic pathways(ko01100)	--	--	--	--	--	--	--	--	--	--
pos_7970	7alpha-Hydroxycholesterol	304.607	250.309	272.65	285.291	267.759	290.632	307.523	361.003	332.547	301.782	276.123	318.697	1.15419	0.206875	0.0278466	1.49861	up	C03594	Primary bile acid biosynthesis(ko00120);;Metabolic pathways(ko01100)	--	--	--	--	HMDB0001496	566-26-7	Organic compounds	Lipids and lipid-like molecules	Steroids and steroid derivatives	Cholestane steroids
pos_799	5-Fluorouridine diphosphate	145.187	184.415	140.34	285.009	188.515	332.235	311.219	360.501	292.382	374.326	188.693	334.133	1.77077	0.824381	0.00239521	1.92329	up	C21748	Drug metabolism - other enzymes(ko00983)	--	--	--	--	--	--	--	--	--	--
pos_8005	Lepidiumterpenyl ester	24502	23754.7	25882.2	29680.4	27411.8	32369.3	40696.6	51221.3	44403.8	46428.2	26246.2	43023.9	1.63924	0.713028	0.0042384	1.91691	up	--	--	--	--	--	--	HMDB0036865	255833-57-9	Organic compounds	Lipids and lipid-like molecules	Prenol lipids	Sesquiterpenoids
pos_8014	Cyclo(glycylleucylvalylleucylprolylseryl)	339.932	305.204	314.415	318.784	322.036	288.029	289.605	250.526	291.433	298.682	320.074	283.655	0.886217	-0.174269	0.00917682	1.70933	down	--	--	--	--	--	--	HMDB0303709	--	Organic compounds	Organic acids and derivatives	Carboxylic acids and derivatives	Amino acids, peptides, and analogues
pos_806	UDP-4-dehydro-6-deoxy-D-glucose	13.8129	0.831707	9.81723e-08	18.4107	4.43438	62.402	56.7916	44.2331	23.884	48.2617	7.49794	47.1145	6.28365	2.6516	0.00172423	1.92172	up	C04089	Amino sugar and nucleotide sugar metabolism(ko00520);;Metabolic pathways(ko01100);;Biosynthesis of nucleotide sugars(ko01250)	--	--	--	--	HMDB0012300	13094-28-5	Organic compounds	Nucleosides, nucleotides, and analogues	Pyrimidine nucleotides	Pyrimidine nucleotide sugars
pos_8118	Methyl jasmonate	16.2449	12.8018	7.61562	18.4495	12.1349	16.2497	19.6518	32.2417	33.4846	23.8146	13.4493	25.0885	1.8654	0.899489	0.0229315	1.59291	up	C11512	alpha-Linolenic acid metabolism(ko00592)	LMFA02020010	Fatty Acyls [FA]	Octadecanoids [FA02]	Jasmonic acids [FA0202]	HMDB0036583	1211-29-6	Organic compounds	Lipids and lipid-like molecules	Fatty Acyls	Lineolic acids and derivatives
pos_812	2-(Dimethylamino)ethyl methacrylate	67.9777	61.8944	57.6929	111.559	72.231	69.4519	59.2863	23.5705	28.691	38.6816	74.271	43.9363	0.591567	-0.757386	0.0492723	1.33694	down	--	--	--	--	--	--	HMDB0244940	--	Organic compounds	Organic acids and derivatives	Carboxylic acids and derivatives	Carboxylic acid derivatives
pos_8130	Cucurbitacin IIa	46412	37172.7	44860.4	55954.7	51653.1	43139	34130	35631.1	33277.7	40569.4	47210.6	37349.4	0.791124	-0.338024	0.0349205	1.44786	down	--	--	--	--	--	--	HMDB0246992	--	Organic compounds	Lipids and lipid-like molecules	Steroids and steroid derivatives	Cucurbitacins
pos_8155	9-OxoODE	9.56448	4.94711	2.80063	14.7221	4.93568	23.062	10.8693	15.2268	22.4399	21.9965	7.394	18.7189	2.53163	1.34007	0.0082144	1.70504	up	C14766	Linoleic acid metabolism(ko00591)	LMFA02000251	Fatty Acyls [FA]	Octadecanoids [FA02]	Other Octadecanoids [FA0200]	HMDB0004669	--	Organic compounds	Lipids and lipid-like molecules	Fatty Acyls	Lineolic acids and derivatives
pos_829	Xanthine	59.2779	39.4513	20.4589	41.7692	36.7645	61.0709	133.673	52.3413	73.2896	82.9932	39.5444	80.6736	2.04008	1.02863	0.0417194	1.48969	up	C00385	Purine metabolism(ko00230);;Caffeine metabolism(ko00232);;Metabolic pathways(ko01100);;Nucleotide metabolism(ko01232)	--	--	--	--	HMDB0000292	69-89-6	Organic compounds	Organoheterocyclic compounds	Imidazopyrimidines	Purines and purine derivatives
pos_8341	MG(0:0/20:1(11Z)/0:0)	12385.8	10810	8996.45	14158.3	11692.1	15747.2	22097.2	37374.5	36316.4	33563.5	11608.5	29019.7	2.49986	1.32185	0.0140924	1.78603	up	--	--	--	--	--	--	HMDB0011543	--	Organic compounds	Lipids and lipid-like molecules	Endocannabinoids	--
pos_8546	HYDROCHLORIDE SALT	1010.45	463.014	1296.35	673.44	838.144	1388.2	973.007	1164.13	1456.66	1348.31	856.281	1266.06	1.47856	0.56419	0.0459407	1.37674	up	--	--	--	--	--	--	--	--	--	--	--	--
pos_8620	Phosphocholine	25988.5	22888.5	25538.7	25515	26572.4	27065.3	26512.8	25769.7	28197.7	29293.6	25300.6	27367.8	1.08171	0.113309	0.0484055	1.38423	up	C00588	Glycerophospholipid metabolism(ko00564);;Metabolic pathways(ko01100);;Choline metabolism in cancer(ko05231)	--	--	--	--	HMDB0001565	3616-04-04	Organic compounds	Organic nitrogen compounds	Organonitrogen compounds	Quaternary ammonium salts
pos_863	5-Hydroxyectoine	956.509	544.686	838.511	714.807	757.492	1132.92	1298.1	991.797	942.86	1164.05	762.401	1105.95	1.45061	0.536659	0.006229	1.70672	up	C16432	Glycine, serine and threonine metabolism(ko00260);;Metabolic pathways(ko01100)	--	--	--	--	--	--	--	--	--	--
pos_867	7-Cyano-7-carbaguanine	6.5701	7.4388	6.36284	7.51707	2.15629	6.89925	22.6657	13.7989	22.7894	19.0013	6.00902	17.0309	2.83423	1.50296	0.0186869	1.69387	up	C15996	Folate biosynthesis(ko00790);;Metabolic pathways(ko01100)	--	--	--	--	--	--	--	--	--	--
pos_869	L-Methionine sulfoximine	303.115	137.328	176.777	156.64	189.216	273.03	375.467	211.366	273.752	290.161	192.615	284.755	1.47836	0.564001	0.0469016	1.35547	up	C03510	--	--	--	--	--	HMDB0029430	1982-67-8	Organic compounds	Organic acids and derivatives	Carboxylic acids and derivatives	Amino acids, peptides, and analogues
pos_8712	Cucurbitacin C	204.042	282.88	163.903	259.998	225.881	509.773	196.07	396.121	636.024	554.917	227.341	458.581	2.01715	1.01232	0.0362846	1.56326	up	C08795	--	LMST01010105	Sterol Lipids [ST]	Sterols [ST01]	Cholesterol and derivatives [ST0101]	HMDB0034706	5988-76-1	Organic compounds	Lipids and lipid-like molecules	Steroids and steroid derivatives	Cucurbitacins
pos_8719	LysoPC(22:5(4Z,7Z,10Z,13Z,16Z)/0:0)	62610.1	46642.9	59338.7	62840.8	60383.3	96593.9	69889	83784.7	58293.7	85299.1	58363.2	78772.1	1.34969	0.432627	0.0338531	1.53429	up	--	--	--	--	--	--	HMDB0010402	--	Organic compounds	Lipids and lipid-like molecules	Glycerophospholipids	Glycerophosphocholines
pos_8991	1,2-dihydroxyheptadec-16-en-4-yl acetate	8.47044	9.81723e-08	2.79152	39.6985	5.87864	83.2473	63.9837	148.629	88.611	106.434	11.3678	98.1809	8.63674	3.11049	0.00171853	1.94527	up	--	--	LMFA05000642	Fatty Acyls [FA]	Fatty alcohols [FA05]	-	HMDB0031045	59499-18-2	Organic compounds	Lipids and lipid-like molecules	Fatty Acyls	Fatty alcohols
pos_904	Methyl beta-D-galactoside	53.361	43.5295	42.211	32.0155	31.265	44.1006	52.7787	57.6628	67.0164	65.8313	40.4764	57.478	1.42004	0.505928	0.0205198	1.52372	up	C03619	ABC transporters(ko02010)	--	--	--	--	HMDB0246173	--	Organic compounds	Organic oxygen compounds	Organooxygen compounds	Carbohydrates and carbohydrate conjugates
pos_9082	L-2-Aminoadipate 6-semialdehyde	16.3591	9.8992	1.21766	26.411	10.1832	37.5211	38.1418	80.2451	61.2353	44.5945	12.814	52.3476	4.08517	2.0304	0.0051729	1.82612	up	C04076	Lysine biosynthesis(ko00300);;Lysine degradation(ko00310);;Metabolic pathways(ko01100);;Biosynthesis of amino acids(ko01230)	--	--	--	--	HMDB0001263	6665-12-09	Organic compounds	Organic acids and derivatives	Carboxylic acids and derivatives	Amino acids, peptides, and analogues
pos_9085	D-Lysopine	1.04564	9.81723e-08	9.81723e-08	6.31501	9.81723e-08	12.5679	7.453	24.9976	14.539	13.2471	1.47213	14.5609	9.89106	3.30613	0.00721978	1.8142	up	C04020	Lysine degradation(ko00310)	--	--	--	--	--	--	--	--	--	--
pos_9088	(5Z,8Z,11Z,14Z,17Z)-Icosapentaenoic acid	4804.12	2694.6	2853.11	17880.8	6824.63	24897.9	19333.1	41231.5	30237.8	33703.2	7011.44	29880.7	4.26171	2.09143	0.00150335	1.90827	up	C06428	Biosynthesis of unsaturated fatty acids(ko01040)	LMFA01030759	Fatty Acyls [FA]	Fatty Acids and Conjugates [FA01]	Unsaturated fatty acids [FA0103]	HMDB0001999	10417-94-4	Organic compounds	Lipids and lipid-like molecules	Fatty Acyls	Fatty acids and conjugates
pos_9090	(+)-Camphor	16.0626	4.63614	5.12441	45.0146	17.106	66.22	52.6597	109.064	143.109	105.286	17.5888	95.2677	5.4164	2.43733	0.00559265	1.83566	up	C00808	Inflammatory mediator regulation of TRP channels(ko04750)	LMPR0102120001	Prenol Lipids [PR]	Isoprenoids [PR01]	C10 isoprenoids (monoterpenes) [PR0102]	HMDB0059838	464-49-3	Organic compounds	Lipids and lipid-like molecules	Prenol lipids	Monoterpenoids
pos_9091	17-Hydroxymethylethisterone	111.726	62.3043	79.2487	367.65	148.735	564.951	407.379	939.768	588.543	672.225	153.933	634.573	4.1224	2.04349	0.00259134	1.8799	up	--	--	--	--	--	--	HMDB0060710	--	Organic compounds	Lipids and lipid-like molecules	Steroids and steroid derivatives	Androstane steroids
pos_9098	Volicitin	284.601	143.281	258.248	176.302	205.983	274.131	228.546	300.647	380.813	332.26	213.683	303.279	1.4193	0.505176	0.0398636	1.38177	up	C16345	alpha-Linolenic acid metabolism(ko00592)	LMFA08020212	Fatty Acyls [FA]	Fatty amides [FA08]	N-acyl amino acids [FA0805]	--	--	--	--	--	--
pos_9100	trans,trans-Farnesyl phosphate	14.895	7.36787	29.8815	8.60871	29.6655	6.2401	6.42513	5.03763	9.81723e-08	9.81723e-08	18.0837	3.54057	0.195788	-2.35264	0.0396963	1.5612	down	C20121	Terpenoid backbone biosynthesis(ko00900)	--	--	--	--	--	--	--	--	--	--
pos_9279	(-)-Amijiol	403.163	196.367	294.549	633.671	361.868	1159.13	705.332	1840.31	2206.86	1610.47	377.924	1504.42	3.98075	1.99304	0.010678	1.79601	up	--	--	LMPR0104250001	Prenol Lipids [PR]	Isoprenoids [PR01]	C20 isoprenoids (diterpenes) [PR0104]	--	--	--	--	--	--
pos_9291	LysoPI(18:2(9Z,12Z)/0:0)	4035.21	2728.11	3444.91	2771.05	3156.57	3457.53	1886.77	1233.3	2103.36	2124.68	3227.17	2161.13	0.669666	-0.578485	0.0442231	1.46908	down	--	--	--	--	--	--	HMDB0240597	1425501-10-5	Organic compounds	Lipids and lipid-like molecules	Glycerophospholipids	Glycerophosphoinositols
pos_9301	O-Arachidonoyl Glycidol	3547.17	2810.6	3120.61	3157.04	3165.98	3180.27	2471.7	2347.93	2685.8	2713.17	3160.28	2679.78	0.847956	-0.237939	0.032187	1.50222	down	--	--	--	--	--	--	--	--	--	--	--	--
pos_9302	DEHYDROCHOLIC ACID	6.19996	9.81723e-08	8.59933	31.8826	6.82577	52.8873	41.4228	70.4473	32.5301	56.7249	10.7015	50.8025	4.74721	2.24708	0.00164273	1.89377	up	C13154	--	LMST04010106	Sterol Lipids [ST]	Bile acids and derivatives [ST04]	C24 bile acids, alcohols, and derivatives [ST0401]	--	--	--	--	--	--
pos_9303	LysoPA(20:4(8Z,11Z,14Z,17Z)/0:0)	214.678	237.711	230.537	206.247	200.828	154.518	154.304	183.244	164.476	136.141	218	158.537	0.727231	-0.459515	0.000463592	1.96295	down	--	--	--	--	--	--	HMDB0114742	--	Organic compounds	Lipids and lipid-like molecules	Glycerophospholipids	Glycerophosphates
pos_9335	19(S)-HETE	109.395	77.0853	110.038	282.981	152.395	366.977	298.425	568.947	524.271	449.55	146.379	441.634	3.01706	1.59314	0.00171786	1.89303	up	C14749	Arachidonic acid metabolism(ko00590);;Metabolic pathways(ko01100)	--	--	--	--	HMDB0011136	79551-85-2	Organic compounds	Lipids and lipid-like molecules	Fatty Acyls	Eicosanoids
pos_9386	n,n-bis(2-hydroxyethyl)dodecanamide	646.971	764.287	499.326	490.404	624.601	466.883	442.626	424.061	120.521	318.59	605.118	354.536	0.585896	-0.771283	0.0162177	1.60301	down	--	--	LMFA08040058	Fatty Acyls [FA]	Fatty amides [FA08]	N-acyl ethanolamines (endocannabinoids) [FA0804]	HMDB0032358	120-40-1	Organic compounds	Lipids and lipid-like molecules	Fatty Acyls	Fatty amides
pos_940	Sarecycline	22.6476	36.7797	16.4105	80.0504	36.0241	45.596	89.5963	69.7058	89.8454	74.245	38.3824	73.7977	1.92269	0.94313	0.0355655	1.51719	up	--	--	--	--	--	--	HMDB0304894	--	Organic compounds	Phenylpropanoids and polyketides	Tetracyclines	--
pos_9402	5-Oxoavermectin ''1a'' aglycone	102.926	62.1978	105.59	59.7436	74.9305	50.6777	60.1017	45.6136	12.9378	2.22796	81.0775	34.3118	0.423197	-1.2406	0.0144263	1.65469	down	C11978	Metabolic pathways(ko01100)	--	--	--	--	--	--	--	--	--	--
pos_9416	prostaglandin a1 ethyl ester	72.4038	39.6041	38.4123	124.976	67.6745	325.979	229.607	551.743	273.516	358.57	68.6142	347.883	5.07013	2.34202	0.00575416	1.88884	up	--	--	--	--	--	--	--	--	--	--	--	--
pos_952	Cystine-glutamate	39.9614	40.0937	40.2819	30.1073	39.0261	27.1428	22.4726	32.119	30.8675	23.9902	37.8941	27.3184	0.720915	-0.472099	0.00455281	1.80297	down	--	--	--	--	--	--	--	--	--	--	--	--
pos_9602	Imiquimod	35.8031	33.9573	34.3965	42.3838	43.2007	31.4236	36.5756	28.6323	29.5161	22.8655	37.9483	29.8026	0.785348	-0.348596	0.0262128	1.49325	down	--	--	--	--	--	--	HMDB0014862	99011-02-6	Organic compounds	Organoheterocyclic compounds	Quinolines and derivatives	Imidazoquinolines
pos_9604	cmpentylf	119.761	100.258	106.463	112.64	119.969	99.4551	95.6313	100.563	91.9989	80.7985	111.818	93.6893	0.83787	-0.255201	0.00850619	1.70403	down	--	--	LMFA01150047	Fatty Acyls [FA]	Fatty Acids and Conjugates [FA01]	Heterocyclic fatty acids [FA0115]	--	--	--	--	--	--
pos_9636	9,10-Epoxy-13-hydroxy-11-octadecenoate	107.828	98.7884	103.612	142.057	114.022	128.15	58.2218	35.4228	26.5075	54.2784	113.261	60.5162	0.534306	-0.904262	0.0389298	1.49084	down	C14834	Linoleic acid metabolism(ko00591)	--	--	--	--	--	--	--	--	--	--
pos_9685	1-Octadecanoyl-sn-glycero-3-phosphoethanolamine	20.0681	15.2909	27.6006	19.1802	21.8176	16.6482	12.9812	19.9224	12.2809	10.11	20.7915	14.3885	0.692039	-0.531074	0.0431653	1.43655	down	C21484	Ferroptosis(ko04216)	LMGP02050001	Glycerophospholipids [GP]	Glycerophosphoethanolamines [GP02]	Monoacylglycerophosphoethanolamines [GP0205]	HMDB0011130	69747-55-3	Organic compounds	Lipids and lipid-like molecules	Glycerophospholipids	Glycerophosphoethanolamines
pos_9740	Icosadienoic acid	9.81723e-08	9.81723e-08	9.81723e-08	10.4018	2.53901	28.959	18.2262	43.6263	27.2947	30.048	2.58816	29.6308	11.4486	3.5171	0.00110773	1.97757	up	C16525	Biosynthesis of unsaturated fatty acids(ko01040)	--	--	--	--	--	--	--	--	--	--
pos_990	7-Methyluric acid	125.069	156.136	94.4993	184.633	144.76	242.415	353.195	177.352	326.032	290.986	141.02	277.996	1.97133	0.979168	0.00817334	1.78366	up	C16355	Caffeine metabolism(ko00232)	--	--	--	--	HMDB0011107	--	Organic compounds	Organoheterocyclic compounds	Imidazopyrimidines	Purines and purine derivatives
pos_991	12-Tridecene-4,6,8,10-tetraynal	517.142	526.327	343.187	663.224	524.539	900.618	1188.63	677.715	1188.01	1000.62	514.884	991.118	1.92493	0.94481	0.00450152	1.83658	up	--	--	--	--	--	--	HMDB0038915	28789-45-9	Organic compounds	Lipids and lipid-like molecules	Fatty Acyls	Fatty aldehydes
pos_995	[Acetyl-[2-(5-methoxy-1H-indol-3-yl)ethyl]amino]oxy hydrogen sulfate	58.3305	61.1656	17.4403	49.7649	50.6272	67.9336	115.921	61.8594	115.691	102.221	47.4657	92.7251	1.95352	0.966073	0.0146363	1.64053	up	--	--	--	--	--	--	--	--	--	--	--	--

## Sheet: Model_vs_L-YP.diff.annotation
Supplementary Table 3: Model_vs_L-YP.diff.annotation
#ID	name	B1	B2	B3	B4	B5	C1	C2	C3	C4	C5	B_Mean	C_Mean	Fold_change	log2FC	Pvalue	VIP	regulated	KEGG_annotation	KEGG_pathway_annotation	LM_ID(lipidmaps)	CATEGORY(lipidmaps)	MAIN_CLASS(lipidmaps)	SUB_CLASS	HMDB_ID	CAS	kingdom(HMDB)	super_class(HMDB)	HMDB_taxonomy	sub_class(HMDB)
neg_1098	4-Carboxy-4-hydroxy-2-oxoadipate	95.6336	75.0077	95.5779	93.1937	81.646	132.686	109.791	107.609	109.149	114.186	88.2118	114.684	1.3001	0.378623	0.00291094	2.0426	up	C04115	Metabolic pathways(ko01100)	--	--	--	--	--	--	--	--	--	--
neg_1100	Perfluoroheptanoic acid	80.5853	75.2586	91.5751	84.4116	79.9715	115.837	98.736	112.935	112.062	103.672	82.3604	108.649	1.31918	0.399645	0.000270888	2.24306	up	--	--	--	--	--	--	HMDB0256322	--	Organic compounds	Organohalogen compounds	Alkyl halides	Alkyl fluorides
neg_1122	Brexpiprazole	35.2265	18.9886	3.12411	44.9399	22.0062	9.81723e-08	6.9712	9.81723e-08	3.00336	6.11571	24.8571	3.21805	0.129462	-2.94939	0.0375809	1.74405	down	--	--	--	--	--	--	HMDB0249379	--	Organic compounds	Organoheterocyclic compounds	Diazinanes	Piperazines
neg_1148	Indolelactic acid	468.074	384.105	703.123	720.702	568.817	595.142	291.851	288.132	286.968	345.155	568.964	361.449	0.635276	-0.654544	0.0469911	1.51631	down	--	--	--	--	--	--	HMDB0000671	7417-65-4	Organic compounds	Organoheterocyclic compounds	Indoles and derivatives	Indolyl carboxylic acids and derivatives
neg_1364	Brevianamide F	146.159	150.8	222.787	117.461	155.837	151.691	114.41	44.2957	44.3137	87.2227	158.609	88.3867	0.557262	-0.843573	0.032496	1.66465	down	C20563	Metabolic pathways(ko01100)	--	--	--	--	--	--	--	--	--	--
neg_1576	Pravastatin	3758.01	863.314	3802.19	2744.17	2842.72	3827.23	5655.88	3381.93	6035.78	4779.06	2802.08	4735.98	1.69017	0.757164	0.0305753	1.68955	up	C01844	Bile secretion(ko04976)	LMFA05000695	Fatty Acyls [FA]	Fatty alcohols [FA05]	-	HMDB0005022	81093-37-0	Organic compounds	Organic acids and derivatives	Hydroxy acids and derivatives	Medium-chain hydroxy acids and derivatives
neg_1578	24,24-Difluoro-1alpha,25-dihydroxyvitamin D3	55.7459	23.3876	68.7536	44.9974	46.3229	53.87	68.1467	70.6963	90.5012	71.2014	47.8415	70.8831	1.48163	0.56718	0.0425096	1.65953	up	--	--	LMST03020145	Sterol Lipids [ST]	Secosteroids [ST03]	Vitamin D3 and derivatives [ST0302]	HMDB0242645	--	Organic compounds	Lipids and lipid-like molecules	Steroids and steroid derivatives	Vitamin D and derivatives
neg_1581	Pregnenolone-3,21-disulfate	460.309	81.0636	537.311	146.839	260.259	483.087	791.242	451.241	945.495	631.713	297.156	660.556	2.22292	1.15246	0.0221656	1.75905	up	--	--	--	--	--	--	HMDB0242133	--	Organic compounds	Lipids and lipid-like molecules	Steroids and steroid derivatives	Sulfated steroids
neg_1612	3-[(3aS,4S,7aS)-7a-Methyl-1,5-dioxo-octahydro-1H-inden-4-yl]propanoate	56.5081	46.1155	52.8502	45.2229	47.9643	53.2007	69.0342	54.7316	61.3941	54.0352	49.7322	58.4792	1.17588	0.233742	0.0489067	1.52894	up	C20199	Metabolic pathways(ko01100)	--	--	--	--	--	--	--	--	--	--
neg_1665	N-Palmitoyl Arginine	5922	4360.22	3814.23	3868.12	4019.51	8614.6	6640.88	5550.16	5544.81	6753.65	4396.82	6620.82	1.50582	0.59055	0.0136831	1.80247	up	--	--	--	--	--	--	HMDB0241920	--	Organic compounds	Lipids and lipid-like molecules	Steroids and steroid derivatives	Androstane steroids
neg_1682	C12272	87.298	83.205	43.1166	78.0011	69.7838	117.76	79.5362	102.191	135.055	96.2329	72.2809	106.155	1.46865	0.554486	0.0257311	1.729	up	--	--	--	--	--	--	--	--	--	--	--	--
neg_1788	Valnemulin	121.153	124.136	116.99	113.854	112.837	101.706	77.5694	100.011	91.9361	75.057	117.794	89.2559	0.757728	-0.400247	0.00448647	2.07736	down	C12066	--	--	--	--	--	HMDB0259752	--	Organic compounds	Lipids and lipid-like molecules	Prenol lipids	Diterpenoids
neg_1913	PC(DiMe(11,3)/18:1(12Z)-2OH(9,10))	18.1843	9.81723e-08	17.1548	24.9311	10.6955	45.5467	22.1172	19.565	48.4732	24.4884	14.1931	32.0381	2.25729	1.17459	0.0480923	1.63965	up	--	--	--	--	--	--	HMDB0288960	--	--	--	--	--
neg_2131	Cholylcitrulline	1712.9	1771.28	1500.97	1554.69	1592.33	1352.79	1285.59	1637.43	1399.28	1339.55	1626.43	1402.93	0.862581	-0.213268	0.0234423	1.71774	down	--	--	--	--	--	--	HMDB0242383	--	--	--	--	--
neg_2137	C07909	209.612	293.145	199.459	567.713	239.998	76.0572	43.454	60.3923	169.376	101.49	301.985	90.1539	0.298537	-1.74402	0.0334269	1.69625	down	--	--	--	--	--	--	--	--	--	--	--	--
neg_2167	Norbicycloekasantalal	1240.27	4517.54	3641.34	979.713	2315.77	7468.83	3320.07	3591.3	5241.53	5018.24	2538.92	4928	1.94098	0.956783	0.0450693	1.57046	up	--	--	--	--	--	--	HMDB0036719	37720-84-6	Organic compounds	Lipids and lipid-like molecules	Prenol lipids	Monoterpenoids
neg_2211	3b,17b-Dihydroxyetiocholane	129.531	699.151	416.316	123.659	300.172	1203.84	444.274	587.551	853.528	754.969	333.766	768.833	2.30351	1.20383	0.0328244	1.65049	up	--	--	--	--	--	--	HMDB0000369	6038-31-9	Organic compounds	Lipids and lipid-like molecules	Steroids and steroid derivatives	Androstane steroids
neg_2256	Emindole SB	14.2911	21.1024	29.1745	39.7995	23.6213	29.0185	69.7572	48.5852	49.7315	38.8131	25.5977	47.1811	1.84317	0.882193	0.0320073	1.64063	up	C20527	Metabolic pathways(ko01100)	--	--	--	--	--	--	--	--	--	--
neg_2271	C16506	157.089	117.075	92.3092	80.1751	96.7249	24.0736	7.60756	81.2426	51.925	41.8065	108.675	41.3311	0.38032	-1.39472	0.00647748	1.88539	down	--	--	--	--	--	--	--	--	--	--	--	--
neg_2285	Deacetylnomilin	128.049	281.648	213.28	90.183	174.713	278.491	207.477	283.508	423.693	329.885	177.575	304.611	1.7154	0.778543	0.0315207	1.69357	up	--	--	--	--	--	--	HMDB0035684	3264-90-2	Organic compounds	Lipids and lipid-like molecules	Prenol lipids	Triterpenoids
neg_2287	xi-5-Hexyldihydro-2(3H)-furanone	3.09565	34.4616	25.9653	3.40575	19.0957	56.4505	20.7691	37.4086	59.5647	54.7877	17.2048	45.7961	2.66182	1.41241	0.0183318	1.80071	up	--	--	--	--	--	--	HMDB0037217	--	Organic compounds	Organoheterocyclic compounds	Lactones	Gamma butyrolactones
neg_2320	Cyclohexaneundecanoic acid	238.616	837.201	640.363	208.661	433.241	1444.39	623.237	923.305	1360.56	1063.41	471.616	1082.98	2.29632	1.19932	0.0134748	1.84922	up	C12100	--	--	--	--	--	HMDB0030997	--	Organic compounds	Lipids and lipid-like molecules	Fatty Acyls	Fatty acids and conjugates
neg_2322	(6E)-8-Hydroxygeraniol	9.83681	43.3989	32.9905	4.09671	21.3229	66.4922	28.2331	51.2527	76.1298	67.4445	22.3291	57.9105	2.59349	1.3749	0.0129447	1.86582	up	C17621	Metabolic pathways(ko01100)	--	--	--	--	HMDB0303979	--	Organic compounds	Lipids and lipid-like molecules	Prenol lipids	Monoterpenoids
neg_2323	Palmitoyl glucuronide	2926.81	8542.64	6282.92	2825.44	4698.74	12385.6	5966.68	9126.69	13451.2	10186.7	5055.31	10223.4	2.0223	1.016	0.0167143	1.81835	up	--	--	--	--	--	--	HMDB0010331	--	Organic compounds	Lipids and lipid-like molecules	Fatty Acyls	Fatty acyl glycosides
neg_2325	Leukotriene D4	40.2735	88.1948	82.8351	14.4998	53.7386	114.648	75.7641	94.6262	202.899	130.127	55.9084	123.613	2.21099	1.14469	0.0352893	1.71854	up	C05951	Arachidonic acid metabolism(ko00590);;Metabolic pathways(ko01100);;Neuroactive ligand-receptor interaction(ko04080);;Fc epsilon RI signaling pathway(ko04664);;Asthma(ko05310)	LMFA03020006	Fatty Acyls [FA]	Eicosanoids [FA03]	Leukotrienes [FA0302]	HMDB0003080	73836-78-9	Organic compounds	Lipids and lipid-like molecules	Fatty Acyls	Eicosanoids
neg_2354	2-Phytyl-1,4-naphthoquinone	48.6374	156.291	237.393	48.8388	124.612	542.016	139.223	306.302	267.949	308.652	123.154	312.828	2.54013	1.3449	0.0418754	1.64283	up	C13309	Ubiquinone and other terpenoid-quinone biosynthesis(ko00130);;Metabolic pathways(ko01100);;Biosynthesis of cofactors(ko01240)	--	--	--	--	HMDB0004649	34625-86-0	Organic compounds	Lipids and lipid-like molecules	Prenol lipids	Quinone and hydroquinone lipids
neg_2413	N-Oleoyl Histidine	1616.44	1899.41	2124.08	2848.92	2108.12	3103.94	4240.44	4395.76	6988.34	4590.72	2119.39	4663.84	2.20055	1.13787	0.0134334	2.00222	up	--	--	LMFA08020133	Fatty Acyls [FA]	Fatty amides [FA08]	N-acyl amino acids [FA0805]	HMDB0241960	--	Organic compounds	Organic acids and derivatives	Carboxylic acids and derivatives	Amino acids, peptides, and analogues
neg_2414	Gentamicin X2	1486.63	1206.66	1507.83	1167.79	1347.89	1856.44	1851.13	2958.5	2688.36	2434.06	1343.36	2357.7	1.75507	0.81153	0.00805457	2.07682	up	C17702	Neomycin, kanamycin and gentamicin biosynthesis(ko00524)	--	--	--	--	--	--	--	--	--	--
neg_2425	2-hydroxyhexadecanoic acid	8952.57	5276.29	6327.1	5001.26	6301.64	8919.71	7892.8	9626.95	11227.5	9114.37	6371.77	9356.27	1.46839	0.554239	0.01067	1.90666	up	--	--	--	--	--	--	HMDB0031057	16452-52-1	Organic compounds	Lipids and lipid-like molecules	Fatty Acyls	Fatty acids and conjugates
neg_2426	Petasitenine	65.524	52.0852	54.1202	25.1	46.9341	58.5063	58.7773	87.0274	92.3678	72.6073	48.7527	73.8572	1.51494	0.599256	0.0316905	1.68478	up	C10359	--	--	--	--	--	HMDB0030328	60102-37-6	Organic compounds	Organoheterocyclic compounds	Azaspirodecane derivatives	--
neg_2458	Oleamide	66.925	36.5863	48.1689	29.0115	51.2419	91.3151	65.3637	57.2921	82.2771	59.4322	46.3867	71.136	1.53354	0.616869	0.0291126	1.66262	up	C19670	--	LMFA08010004	Fatty Acyls [FA]	Fatty amides [FA08]	Primary amides [FA0801]	HMDB0002117	301-02-0	Organic compounds	Lipids and lipid-like molecules	Fatty Acyls	Fatty amides
neg_2473	Pregnenolone	34.0055	23.392	21.6035	13.8905	22.3508	30.6255	33.2196	36.7603	33.4961	35.7254	23.0484	33.9653	1.47365	0.559395	0.0242564	1.81562	up	C01953	Steroid hormone biosynthesis(ko00140);;Metabolic pathways(ko01100);;Ovarian steroidogenesis(ko04913);;Aldosterone synthesis and secretion(ko04925);;Cortisol synthesis and secretion(ko04927);;Cushing syndrome(ko04934)	LMST02030088	Sterol Lipids [ST]	Steroids [ST02]	C21 steroids (gluco/mineralocorticoids, progestogins) and derivatives [ST0203]	HMDB0000253	145-13-1	Organic compounds	Lipids and lipid-like molecules	Steroids and steroid derivatives	Pregnane steroids
neg_2478	(4E,7E,10Z,13E,16E,19E)-docosa-4,7,10,13,16,19-hexaenoic acid	125847	96640.3	101872	62018.2	92153.9	116021	135590	168247	176672	151259	95706.4	149558	1.56267	0.644015	0.00714876	1.93639	up	--	--	--	--	--	--	HMDB0251558	--	Organic compounds	Lipids and lipid-like molecules	Fatty Acyls	Fatty acids and conjugates
neg_2485	Rostafuroxin	8452.53	6172.75	6615.27	5859.32	7210.74	6751.8	8420.88	9569.36	10644.1	9082.24	6862.12	8893.68	1.29605	0.374125	0.0364631	1.66782	up	--	--	--	--	--	--	HMDB0257312	--	Organic compounds	Lipids and lipid-like molecules	Steroids and steroid derivatives	17-furanylsteroids and derivatives
neg_2491	5,10-Methenyltetrahydrofolate	299.367	225.722	254.726	149.227	219.796	235.285	284.065	353.24	400.554	321.701	229.767	318.969	1.38823	0.473242	0.0452535	1.61272	up	C00445	One carbon pool by folate(ko00670);;Metabolic pathways(ko01100);;Carbon metabolism(ko01200);;Biosynthesis of cofactors(ko01240)	--	--	--	--	HMDB0001354	7444-29-3	Organic compounds	Organoheterocyclic compounds	Pteridines and derivatives	Pterins and derivatives
neg_2492	1-Lyso-2-arachidonoyl-phosphatidate	1563.83	1068.99	1320.77	1152.3	1275.36	1759.69	1650.56	3334.23	3696.99	2630.93	1276.25	2614.48	2.04856	1.03461	0.0292356	1.88537	up	--	--	--	--	--	--	HMDB0012496	--	Organic compounds	Lipids and lipid-like molecules	Glycerophospholipids	Glycerophosphates
neg_2493	Methyl salicylate O-[rhamnosyl-(1->6)-glucoside]	126.178	66.6516	81.9895	28.7793	69.6437	86.9889	132.922	132.563	196.175	128.511	74.6484	135.432	1.81426	0.859383	0.0323415	1.67929	up	--	--	--	--	--	--	HMDB0033138	--	Organic compounds	Organic oxygen compounds	Organooxygen compounds	Carbohydrates and carbohydrate conjugates
neg_2494	C17960	280.198	162.193	190.748	104.122	198.127	191.314	296.59	254.247	338.179	297.039	187.077	275.474	1.47251	0.55828	0.048431	1.56267	up	--	--	--	--	--	--	--	--	--	--	--	--
neg_2500	DG(15:0/22:6(5Z,7Z,10Z,13Z,16Z,19Z)-OH(4)/0:0)	1009.15	669.126	758.123	674.717	828.206	779.758	1031.51	1230.2	1295.4	1092.29	787.863	1085.83	1.3782	0.462783	0.0291449	1.71479	up	--	--	--	--	--	--	HMDB0295343	--	--	--	--	--
neg_2556	8,11-eicosadiynoic acid	16149.1	13568.6	11075.6	8149.98	11545.4	14048.5	12650.3	19509.2	22460.8	18083.2	12097.7	17350.4	1.43419	0.520232	0.049152	1.61102	up	--	--	LMFA01030688	Fatty Acyls [FA]	Fatty Acids and Conjugates [FA01]	Unsaturated fatty acids [FA0103]	--	--	--	--	--	--
neg_2576	Bruceine D	96.5556	78.3625	103.278	37.7427	76.2213	77.2372	122.204	128.934	136.324	108.48	78.4321	114.636	1.46159	0.547542	0.0474478	1.55963	up	C08752	--	--	--	--	--	--	--	--	--	--	--
neg_2588	Methyl sterculate	4057.58	2333.06	2910.86	1669.93	2802.09	4000.28	4645.04	5304.33	4490.59	4716.63	2754.7	4631.37	1.68126	0.749545	0.00534416	2.00589	up	--	--	--	--	--	--	HMDB0254613	--	Organic compounds	Lipids and lipid-like molecules	Fatty Acyls	Fatty acid esters
neg_2618	Rumenic acid	5800.04	4302.73	5068.28	3828.19	4842.98	5885.22	6236.28	6871.44	5962.7	6398.44	4768.45	6270.82	1.31506	0.395134	0.00736045	1.963	up	C04056	Linoleic acid metabolism(ko00591)	LMFA01030118	Fatty Acyls [FA]	Fatty Acids and Conjugates [FA01]	Unsaturated fatty acids [FA0103]	HMDB0003797	2540-56-9	Organic compounds	Lipids and lipid-like molecules	Fatty Acyls	Lineolic acids and derivatives
neg_2627	N-[Diaminophosphoryloxy-[di(propan-2-yl)amino]phosphoryl]-N-propan-2-ylpropan-2-amine	1859.9	1220.63	1349	1005.27	1423.02	1682.94	1804.56	1638.68	1912.11	1754.14	1371.56	1758.49	1.2821	0.358512	0.0493756	1.64217	up	--	--	--	--	--	--	--	--	--	--	--	--
neg_2628	Ecabet	75304.5	55649.4	59172.2	46692.3	60094.3	66510.9	72105.9	69141.6	81562.4	78327.3	59382.6	73529.6	1.23824	0.308286	0.0367555	1.67641	up	--	--	--	--	--	--	HMDB0015613	86408-72-2	Organic compounds	Lipids and lipid-like molecules	Prenol lipids	Diterpenoids
neg_2633	Topotecan	343.691	180.997	264.948	194.669	252.075	314.118	363.387	363.005	351.92	317.812	247.276	342.048	1.38327	0.468078	0.0272869	1.77714	up	C11158	Bile secretion(ko04976)	--	--	--	--	HMDB0015164	119413-54-6	Organic compounds	Alkaloids and derivatives	Camptothecins	--
neg_2635	Teasterone	347.719	378.067	344.759	353.721	380.546	619.751	428.765	417.71	445.144	482.038	360.962	478.682	1.32613	0.407218	0.0316712	1.77922	up	C15791	Metabolic pathways(ko01100)	LMST01030121	Sterol Lipids [ST]	Sterols [ST01]	Ergosterols and C24-methyl derivatives [ST0103]	--	--	--	--	--	--
neg_264	Sulfate	917.149	907.112	966.775	895.59	860.409	1096.44	1058.61	982.298	961.615	1054.6	909.407	1030.71	1.13339	0.180644	0.00534613	1.9656	up	C00059	Purine metabolism(ko00230);;Monobactam biosynthesis(ko00261);;Cysteine and methionine metabolism(ko00270);;Sulfur metabolism(ko00920);;Metabolic pathways(ko01100);;ABC transporters(ko02010)	--	--	--	--	HMDB0001448	14808-79-8	Inorganic compounds	Homogeneous non-metal compounds	Non-metal oxoanionic compounds	Non-metal sulfates
neg_2658	C06633	731.657	435.141	392.242	543.534	631.762	940.769	653.606	787.554	741.043	854.476	546.867	795.49	1.45463	0.540653	0.0148457	1.79844	up	--	--	--	--	--	--	--	--	--	--	--	--
neg_2660	trans-16-Octadecenoic acid	8799.38	7837.25	7029.53	6311.22	7493.17	10392.3	8004.76	13713.3	15890.8	11408.6	7494.11	11881.9	1.5855	0.664942	0.029175	1.85255	up	--	--	LMFA01030081	Fatty Acyls [FA]	Fatty Acids and Conjugates [FA01]	Unsaturated fatty acids [FA0103]	HMDB0304769	--	Organic compounds	Lipids and lipid-like molecules	Fatty Acyls	Fatty acids and conjugates
neg_2685	Sclareol	3384.78	1795.25	2344.55	1810.47	2395.09	3105.53	3667.04	3850.68	4251.96	3655.2	2346.03	3706.08	1.57973	0.659675	0.0057614	1.99527	up	C09183	--	LMPR0104030010	Prenol Lipids [PR]	Isoprenoids [PR01]	C20 isoprenoids (diterpenes) [PR0104]	HMDB0036827	515-03-7	Organic compounds	Lipids and lipid-like molecules	Prenol lipids	Diterpenoids
neg_2687	9'-Carboxy-gamma-chromanol	255.19	151.154	180.561	170.428	222.355	222.335	274.91	263.871	327.691	269.864	195.938	271.734	1.38684	0.471803	0.0172686	1.78449	up	--	--	--	--	--	--	HMDB0012868	1215088-64-4	Organic compounds	Organoheterocyclic compounds	Benzopyrans	1-benzopyrans
neg_2689	Farnesoic acid	270.922	340.647	324.973	238.192	358.458	486.431	372.035	347.63	446.195	419.568	306.638	414.372	1.35134	0.434389	0.0127207	1.80684	up	C16502	Insect hormone biosynthesis(ko00981)	--	--	--	--	--	--	--	--	--	--
neg_2709	L-Nicotianine	90.3442	53.6562	72.1814	42.3008	81.292	80.1442	95.0033	91.2226	119.83	95.1276	67.9549	96.2656	1.41661	0.502442	0.0348587	1.65245	up	--	--	--	--	--	--	HMDB0029397	19701-79-2	Organic compounds	Organic acids and derivatives	Carboxylic acids and derivatives	Amino acids, peptides, and analogues
neg_2720	Quinceoxepine	559.897	237.714	423.64	231.917	340.456	493.477	610.874	892.891	650.94	607.218	358.725	651.08	1.81498	0.859957	0.0119086	1.83582	up	--	--	--	--	--	--	HMDB0038107	132925-10-1	Organic compounds	Organic oxygen compounds	Organooxygen compounds	Ethers
neg_2724	Octadecanoic acid	162.378	86.394	98.2481	80.175	106.769	164.527	161.96	350.999	259.603	210.8	106.793	229.578	2.14975	1.10417	0.0213665	1.8459	up	C01530	Fatty acid biosynthesis(ko00061);;Biosynthesis of unsaturated fatty acids(ko01040);;Metabolic pathways(ko01100);;Phototransduction - fly(ko04745)	LMFA01010018	Fatty Acyls [FA]	Fatty Acids and Conjugates [FA01]	Straight chain fatty acids [FA0101]	HMDB0000827	1957-11-04	Organic compounds	Lipids and lipid-like molecules	Fatty Acyls	Fatty acids and conjugates
neg_2725	Diflorasone	242.825	137.168	201.232	141.822	217.156	281.156	287.4	275.402	291.617	327.583	188.04	292.631	1.55622	0.638042	0.0047311	2.06767	up	--	--	--	--	--	--	HMDB0014368	2557-49-5	Organic compounds	Lipids and lipid-like molecules	Steroids and steroid derivatives	Hydroxysteroids
neg_2741	Levomethadyl acetate	17.7194	18.8906	9.42066	25.4725	28.0322	44.0619	20.7109	31.4635	28.3149	41.8503	19.9071	33.2803	1.67178	0.741388	0.0411858	1.58932	up	C08012	Drug metabolism - cytochrome P450(ko00982)	--	--	--	--	HMDB0015358	1477-40-3	Organic compounds	Benzenoids	Benzene and substituted derivatives	Diphenylmethanes
neg_2748	20,26-Dihydroxyecdysone	55.6816	58.4537	54.6378	43.7292	53.2863	56.8002	67.3896	60.9899	70.3646	69.7166	53.1577	65.0522	1.22376	0.291318	0.0115021	1.83842	up	C16500	Insect hormone biosynthesis(ko00981)	LMST01010184	Sterol Lipids [ST]	Sterols [ST01]	Cholesterol and derivatives [ST0101]	HMDB0245570	--	Organic compounds	Lipids and lipid-like molecules	Steroids and steroid derivatives	Bile acids, alcohols and derivatives
neg_2757	DL-2-hydroxy stearic acid	5618.07	2153.09	3162.12	2165.48	2904.91	4832.91	4427.91	4661.26	7928.27	5623.41	3200.73	5494.75	1.71672	0.779653	0.0347013	1.69415	up	--	--	LMFA02000120	Fatty Acyls [FA]	Octadecanoids [FA02]	Other Octadecanoids [FA0200]	--	--	--	--	--	--
neg_2759	Limonene aldehyde	714.074	359.396	513.569	286.588	437.907	765.072	714.691	619.18	844.494	772.281	462.307	743.144	1.60747	0.68479	0.0146326	1.89854	up	--	--	--	--	--	--	HMDB0030252	6784-13-0	Organic compounds	Lipids and lipid-like molecules	Prenol lipids	Monoterpenoids
neg_2783	QUINALPHOS	369.738	316.619	322.953	297.019	297.494	364.875	352.659	396.937	389.224	344.144	320.764	369.568	1.15215	0.204325	0.020897	1.77167	up	C11030	--	--	--	--	--	HMDB0257033	--	Organic compounds	Organoheterocyclic compounds	Diazanaphthalenes	Benzodiazines
neg_2784	n-octyl-beta-D-thioglucopyranoside	921.455	695.128	731.244	277.613	530.537	892.366	895.567	956.352	1149.79	999.887	631.195	978.791	1.55069	0.632915	0.0286529	1.78493	up	--	--	--	--	--	--	HMDB0255216	--	Organic compounds	Organic oxygen compounds	Organooxygen compounds	Carbohydrates and carbohydrate conjugates
neg_2788	6-[[3-Fluoro-5-(4-methoxyoxan-4-yl)phenoxy]methyl]-1-methylquinolin-2-one	152.815	87.6411	153.685	113.139	148.317	201.272	173.566	228.626	231.303	208.171	131.119	208.588	1.59082	0.669774	0.0020163	2.10184	up	--	--	--	--	--	--	HMDB0253359	--	Organic compounds	Organoheterocyclic compounds	Quinolines and derivatives	Quinolones and derivatives
neg_2813	Dicrocin	5508.03	3965.55	4899.37	1902.77	3537.04	5626.78	7565.84	5632.54	5344.23	6614.72	3962.55	6156.82	1.55375	0.635757	0.021674	1.71693	up	--	--	--	--	--	--	HMDB0002353	57710-64-2	Organic compounds	Lipids and lipid-like molecules	Prenol lipids	Diterpenoids
neg_2814	PG(20:1(11Z)/PGE2)	112.247	86.791	95.208	28.7149	63.2305	130.339	166.752	141.68	128.457	156.14	77.2382	144.674	1.87308	0.905416	0.00611723	1.98195	up	--	--	--	--	--	--	HMDB0269515	--	--	--	--	--
neg_2815	alpha-Tocopherol	215.24	231.309	224.744	162.589	188.273	442.616	230.081	280.105	296.558	326.279	204.431	315.128	1.54149	0.624323	0.0322817	1.76526	up	C02477	Ubiquinone and other terpenoid-quinone biosynthesis(ko00130);;Metabolic pathways(ko01100);;Biosynthesis of cofactors(ko01240);;Ferroptosis(ko04216);;Vitamin digestion and absorption(ko04977)	LMPR02020001	Prenol Lipids [PR]	Quinones and hydroquinones [PR02]	Vitamin E [PR0202]	HMDB0001893	1959-02-09	Organic compounds	Lipids and lipid-like molecules	Prenol lipids	Quinone and hydroquinone lipids
neg_2842	C17582	249.537	180.931	246.282	147.583	218.21	250.637	258.643	298.324	297.55	274.717	208.509	275.974	1.32356	0.404426	0.0222188	1.81009	up	--	--	--	--	--	--	--	--	--	--	--	--
neg_2859	Oleandolide	77.2538	65.8013	70.037	47.4593	56.7699	74.5844	76.0489	88.2978	100.773	82.5449	63.4642	84.4498	1.33067	0.41215	0.0177831	1.81493	up	C11990	Metabolic pathways(ko01100)	LMPK04000031	Polyketides [PK]	Macrolides and lactone polyketides [PK04]	-	--	--	--	--	--	--
neg_2878	DG(i-14:0/20:5(7Z,9Z,11E,13E,17Z)-3OH(5,6,15)/0:0)	173.146	143.776	109.025	64.4893	132.224	261.861	215.81	245.962	216.549	308.596	124.532	249.756	2.00555	1.004	0.00105705	2.10452	up	--	--	--	--	--	--	HMDB0298865	--	--	--	--	--
neg_2898	2'-N-Acetylparomamine	20.7739	5.8996	26.9743	7.55513	16.8995	19.8253	22.0875	36.4381	50.4035	34.8068	15.6205	32.7122	2.09419	1.06639	0.039147	1.69256	up	C17582	Neomycin, kanamycin and gentamicin biosynthesis(ko00524)	--	--	--	--	--	--	--	--	--	--
neg_2899	Pyridinoline	68.4087	34.6356	85.2916	34.0147	64.5364	64.5276	72.3885	102.04	114.751	108.277	57.3774	92.3968	1.61033	0.68736	0.0390226	1.66219	up	--	--	--	--	--	--	HMDB0000851	63800-01-1	Organic compounds	Organic acids and derivatives	Carboxylic acids and derivatives	Amino acids, peptides, and analogues
neg_3051	LysoPI(0:0/18:0)	758.013	628.325	499.02	516.828	690.324	845.267	924.076	2011.84	2028.33	1761.71	618.502	1514.25	2.44825	1.29175	0.0253562	1.9084	up	--	--	--	--	--	--	HMDB0061704	1913287-87-2	Organic compounds	Lipids and lipid-like molecules	Glycerophospholipids	Glycerophosphoinositols
neg_600	(S)-DNPA	31.4843	26.4496	45.4767	47.0877	41.258	31.4676	32.1564	20.4097	26.4477	23.3055	38.3513	26.7574	0.697693	-0.519335	0.0441675	1.60212	down	C12434	Metabolic pathways(ko01100)	--	--	--	--	--	--	--	--	--	--
neg_706	C12368	35.5897	12.5333	29.3351	52.4401	36.109	23.7442	15.5056	9.81723e-08	20.5962	9.77448	33.2015	13.9241	0.419382	-1.25366	0.0409544	1.57468	down	--	--	--	--	--	--	--	--	--	--	--	--
neg_715	Aranidipine	331.437	226.494	206.97	455.439	291.457	187.643	148.023	28.5676	259.384	146.926	302.359	154.109	0.509687	-0.972315	0.0346341	1.5737	down	--	--	--	--	--	--	HMDB0248563	--	Organic compounds	Organoheterocyclic compounds	Pyridines and derivatives	Hydropyridines
neg_718	Eterobarb	867.116	578.117	522.058	1218.82	752.227	515.526	359.865	79.4057	623.664	364.513	787.669	388.595	0.493348	-1.01932	0.0346084	1.58768	down	--	--	--	--	--	--	HMDB0251993	--	Organic compounds	Organoheterocyclic compounds	Diazines	Pyrimidines and pyrimidine derivatives
neg_737	3-Maleimidobenzoic acid N-hydroxysuccinimide ester	6.61155	14.8214	20.1102	22.6159	18.2609	8.73995	7.85166	6.52565	8.04487	7.63663	16.484	7.75975	0.470744	-1.08698	0.0340819	1.78162	down	--	--	--	--	--	--	HMDB0246994	--	Organic compounds	Benzenoids	Benzene and substituted derivatives	Benzoic acids and derivatives
neg_744	C18034	217.657	127.554	131.617	236.085	196.868	133.962	58.7087	7.4588	136.477	74.8486	181.956	82.2909	0.452257	-1.14479	0.016628	1.72899	down	--	--	--	--	--	--	--	--	--	--	--	--
neg_746	C06397	532.002	511.14	474.298	602.146	525.109	412.131	347.633	268.962	426.824	344.291	528.939	359.968	0.680548	-0.555231	0.00166013	2.05962	down	--	--	--	--	--	--	--	--	--	--	--	--
neg_753	N-Acetyl-N6,O-didemethylpuromycin-5'-phosphate	749.844	459.567	445.976	785.68	654.691	433.242	275.61	52.8747	534.078	325.222	619.152	324.205	0.523628	-0.933385	0.0262537	1.63616	down	C07029	Metabolic pathways(ko01100)	--	--	--	--	--	--	--	--	--	--
neg_855	N-Acetylneuraminate	106.901	264.448	331.997	263.559	219.614	248.708	87.5652	57.3781	17.2688	96.0873	237.304	101.402	0.427307	-1.22665	0.0364724	1.61687	down	C00270	Amino sugar and nucleotide sugar metabolism(ko00520);;Metabolic pathways(ko01100);;Biosynthesis of nucleotide sugars(ko01250)	--	--	--	--	HMDB0000230	19342-33-7	Organic compounds	Organic oxygen compounds	Organooxygen compounds	Carbohydrates and carbohydrate conjugates
neg_857	UDP-L-Ara4FN	30.0426	29.7228	40.2546	48.222	23.3439	27.9965	15.2283	0.998857	19.0971	3.00724	34.3172	13.2656	0.386559	-1.37124	0.014128	1.75902	down	C16154	Amino sugar and nucleotide sugar metabolism(ko00520);;Metabolic pathways(ko01100)	--	--	--	--	--	--	--	--	--	--
neg_881	5-Methoxytryptophan	72.7587	145.219	177.742	89.322	120.104	49.7825	2.11713	96.0295	60.8746	44.6096	121.029	50.6827	0.418764	-1.25579	0.0206444	1.70291	down	--	--	--	--	--	--	HMDB0002339	2504-22-5	Organic compounds	Organoheterocyclic compounds	Indoles and derivatives	Tryptamines and derivatives
pos_10001	Stearoylcarnitine	251.167	242.872	497.75	162.559	190.474	506.65	1309.65	1277.31	2939.73	1468.76	268.964	1500.42	5.57851	2.47988	0.0351663	1.84764	up	--	--	LMFA07070008	Fatty Acyls [FA]	Fatty esters [FA07]	Fatty acyl carnitines [FA0707]	HMDB0000848	25597-09-5	Organic compounds	Lipids and lipid-like molecules	Fatty Acyls	Fatty acid esters
pos_1009	7,8-Dihydro-7,8-dihydroxykynurenate	625.757	646.626	716.219	835.938	786.77	463.624	501.95	379.307	721.055	541.14	722.262	521.415	0.72192	-0.47009	0.022456	1.67589	down	C01249	Tryptophan metabolism(ko00380)	--	--	--	--	--	--	--	--	--	--
pos_10168	PC(18_3(9Z,12Z,15Z)_20_0)	59382.6	91227.2	74630.1	34838.9	72130.6	79810.6	104918	123629	116746	88539.8	66441.9	102729	1.54614	0.628673	0.020172	1.7048	up	--	--	--	--	--	--	--	--	--	--	--	--
pos_1021	Cyanuric acid	70.8076	76.409	63.3155	89.8516	73.7212	61.8409	58.176	51.2658	39.3706	56.9175	74.821	53.5141	0.715229	-0.483523	0.0067231	1.94876	down	C06554	Metabolic pathways(ko01100)	--	--	--	--	HMDB0041861	108-80-5	Organic compounds	Organoheterocyclic compounds	Triazines	1,3,5-triazines
pos_10275	5(Z),8(Z),11(Z)-Eicosatrienoic acid	1585.9	917.771	1290.31	304.551	691.271	1164.78	1760.5	2228.39	2417.62	1946.79	957.962	1903.61	1.98715	0.990701	0.0162211	1.8179	up	--	--	--	--	--	--	--	--	--	--	--	--
pos_10279	Ramifenazone	234.99	103.273	239.315	12.6805	9.81723e-08	676.951	452.154	327.035	436.55	675.431	118.052	513.624	4.35084	2.1213	0.00229742	2.08761	up	--	--	--	--	--	--	HMDB0257103	--	Organic compounds	Organoheterocyclic compounds	Azoles	Pyrazoles
pos_10282	PAF (Platelet Activating Factor)	347884	307852	366665	49084.9	108794	394632	446078	525219	546971	562662	236056	495112	2.09744	1.06863	0.0127127	1.93998	up	--	--	--	--	--	--	--	--	--	--	--	--
pos_10286	LysoPC(20:1(11Z)/0:0)	34613.4	21150.9	28731.9	9885.49	9378.27	56218	45830.3	36570.9	41183.3	56329.8	20752	47226.4	2.27575	1.18634	0.00365151	2.0246	up	--	--	--	--	--	--	HMDB0010391	--	Organic compounds	Lipids and lipid-like molecules	Glycerophospholipids	Glycerophosphocholines
pos_10451	2'''-N-Acetyl-6'''-deamino-6'''-hydroxyparomomycin II	87.2609	67.9509	103.763	9.81723e-08	9.81723e-08	141.712	137.307	90.1736	77.51	149.478	51.7949	119.236	2.30208	1.20294	0.0377256	1.63385	up	C21261	Neomycin, kanamycin and gentamicin biosynthesis(ko00524)	--	--	--	--	--	--	--	--	--	--
pos_10669	Laprafylline	2850.96	2582.18	3353.5	741.282	975.449	3487.53	4081.27	3792.48	3399.71	4343.65	2100.67	3820.93	1.81891	0.863071	0.0271359	1.8135	up	--	--	--	--	--	--	HMDB0253980	--	Organic compounds	Benzenoids	Benzene and substituted derivatives	Diphenylmethanes
pos_10671	Platelet-activating factor	232048	253912	278375	60793	120821	239013	293817	349970	317514	320122	189190	304087	1.60731	0.68465	0.0496248	1.63307	up	C04598	Ether lipid metabolism(ko00565);;Metabolic pathways(ko01100);;Neuroactive ligand-receptor interaction(ko04080);;Asthma(ko05310)	LMGP01020005	Glycerophospholipids [GP]	Glycerophosphocholines [GP01]	1-alkyl,2-acylglycerophosphocholines [GP0102]	HMDB0062195	74389-68-7	Organic compounds	Lipids and lipid-like molecules	Glycerophospholipids	Glycerophosphocholines
pos_10770	3-Ethyl-4-(9-hydroxy-4,6,8,10-tetramethyl-7-oxododec-4-en-2-yl)oxetan-2-one	1421.02	948.662	803.486	346.563	611.183	1469.02	1403.69	1475.91	1199.02	1578.14	826.184	1425.16	1.72499	0.786585	0.0257095	1.79441	up	--	--	--	--	--	--	HMDB0251673	--	Organic compounds	Lipids and lipid-like molecules	Prenol lipids	Terpene lactones
pos_10784	Procaine	397.412	342.367	396.139	219.486	225.573	373.983	401.845	555.87	727.631	544.727	316.196	520.811	1.64712	0.719943	0.030172	1.77539	up	C07375	--	--	--	--	--	HMDB0014859	59-46-1	Organic compounds	Benzenoids	Benzene and substituted derivatives	Benzoic acids and derivatives
pos_10785	Diethyl decanedioate	4317.07	3702.31	3868.52	2544.99	3207.05	3630.97	4271.1	5010.12	4694.43	4561.3	3527.99	4433.58	1.25669	0.329627	0.0474085	1.58303	up	--	--	--	--	--	--	HMDB0040429	110-40-7	Organic compounds	Lipids and lipid-like molecules	Fatty Acyls	Fatty acid esters
pos_10990	1-(8Z,11Z,14Z-eicosatrienoyl)-sn-glycero-3-phosphocholine	82653.1	100839	106248	61378.6	63538.7	95203.8	116559	164039	125473	134634	82931.4	127182	1.53358	0.6169	0.0169965	1.79756	up	--	--	--	--	--	--	--	--	--	--	--	--
pos_1127	Tryptophan 2-C-mannoside	4850.38	2899.81	2875.08	6386.17	4730.48	2638.34	1843.72	413.307	3558.5	1944.14	4348.38	2079.6	0.478247	-1.06417	0.028751	1.63034	down	--	--	--	--	--	--	HMDB0240296	180509-18-6	Organic compounds	Organoheterocyclic compounds	Indoles and derivatives	Indolyl carboxylic acids and derivatives
pos_1128	Phenylacetylglutamine	50.8803	37.2575	40.3219	67.1198	56.857	34.8621	26.2801	2.56167	43.2737	14.2786	50.4873	24.2512	0.480343	-1.05786	0.0217188	1.70952	down	C04148	Phenylalanine metabolism(ko00360)	--	--	--	--	HMDB0006344	28047-15-6	Organic compounds	Organic acids and derivatives	Carboxylic acids and derivatives	Amino acids, peptides, and analogues
pos_1146	5-(L-Alanin-3-yl)-2-hydroxy-cis,cis-muconate 6-semialdehyde	30.0069	17.3448	16.4822	30.0058	27.7238	11.348	16.6595	1.01771	21.3353	10.7949	24.3127	12.2311	0.503073	-0.991161	0.0297962	1.63856	down	C04797	Tyrosine metabolism(ko00350)	LMFA01170073	Fatty Acyls [FA]	Fatty Acids and Conjugates [FA01]	Dicarboxylic acids [FA0117]	--	--	--	--	--	--
pos_1147	Epigallocatechin 3-caffeate	44.7263	30.2066	24.6185	56.3472	38.9719	25.2409	16.5965	9.81723e-08	28.5179	8.46954	38.9741	15.765	0.404499	-1.30579	0.0163419	1.74594	down	--	--	--	--	--	--	HMDB0301926	--	Organic compounds	Phenylpropanoids and polyketides	Flavonoids	Flavans
pos_1149	Ser Asn Phe	12933.3	7034.84	6650.37	16108.2	11354.6	6037.53	4431.44	980.243	7980.98	4451.21	10816.3	4776.28	0.441583	-1.17924	0.0260347	1.67681	down	--	--	--	--	--	--	--	--	--	--	--	--
pos_11508	PC(18:0/TXB2)	382.679	224.071	335.896	13.0152	2.12591	1032.97	659.495	288.93	410.14	660.562	191.557	610.42	3.18662	1.67203	0.0284833	1.69451	up	--	--	--	--	--	--	HMDB0286245	--	--	--	--	--
pos_11549	Mitomycin A	879.67	319.021	527.878	9.81723e-08	56.7686	876.05	1278.97	586.222	657.481	924.277	356.667	864.601	2.42411	1.27745	0.0383456	1.59158	up	C21161	--	--	--	--	--	HMDB0254761	--	Organic compounds	Organoheterocyclic compounds	Indoles and derivatives	Indolequinones
pos_11550	Acarbose 7IV-phosphate	809.365	643.644	1093.33	580.429	303.957	998.049	1373.15	1162.4	1311.03	1596.44	686.144	1288.21	1.87747	0.908789	0.00717841	1.97539	up	C21156	Metabolic pathways(ko01100)	--	--	--	--	--	--	--	--	--	--
pos_1172	Norsalsolinol	405.415	427.918	392.739	449.648	440.676	388.563	243.923	172.699	310.694	278.95	423.279	278.966	0.659058	-0.601522	0.0132116	1.93959	down	--	--	--	--	--	--	HMDB0006044	34827-33-3	Organic compounds	Organoheterocyclic compounds	Tetrahydroisoquinolines	--
pos_11728	1'-Hydroxybufuralol	3710.67	2369.21	3513.99	1052.18	698.145	6550.97	4875.18	4322.62	3670.19	4905.47	2268.84	4864.89	2.14422	1.10045	0.0113102	1.85451	up	--	--	--	--	--	--	HMDB0244261	--	Organic compounds	Organoheterocyclic compounds	Benzofurans	--
pos_1176	Indoleacrylic acid	67053.6	106083	98757.2	100817	101604	96538.2	63144.2	55006.6	62063.7	73652.8	94862.9	70081.1	0.738762	-0.436818	0.0400117	1.60193	down	--	--	--	--	--	--	HMDB0000734	29953-71-7	Organic compounds	Organoheterocyclic compounds	Indoles and derivatives	Indoles
pos_11768	PC(P-18:1(11Z)/PGE2)	626.131	308.184	413.406	45.4796	59.2141	1415.98	1097.56	402.206	601.867	846.475	290.483	872.819	3.00472	1.58723	0.0291321	1.67289	up	--	--	--	--	--	--	HMDB0289657	--	--	--	--	--
pos_1179	N-Acetyl-L-glutamate	115.831	195.202	177.355	203.016	173.051	181.73	100.848	84.4714	92.6878	108.272	172.891	113.602	0.657072	-0.605876	0.0345789	1.6345	down	C00624	Arginine biosynthesis(ko00220);;D-Amino acid metabolism(ko00470);;Metabolic pathways(ko01100);;2-Oxocarboxylic acid metabolism(ko01210);;Biosynthesis of amino acids(ko01230)	--	--	--	--	HMDB0001138	1188-37-0	Organic compounds	Organic acids and derivatives	Carboxylic acids and derivatives	Amino acids, peptides, and analogues
pos_12299	Rhizocticin C	8875.84	5564.84	4959.02	1730.37	4921.59	283.189	30.9827	3524.43	2275.45	1323.11	5210.33	1487.43	0.285477	-1.80855	0.0275296	1.70016	down	C17960	Phosphonate and phosphinate metabolism(ko00440)	--	--	--	--	--	--	--	--	--	--
pos_1362	Isochorismate	13.5701	24.2456	26.8183	26.1266	30.9437	22.8541	8.25927	2.53468	9.81723e-08	5.55713	24.3408	7.84104	0.322135	-1.63426	0.0117508	1.89261	down	C00885	Ubiquinone and other terpenoid-quinone biosynthesis(ko00130);;Metabolic pathways(ko01100);;Biosynthesis of cofactors(ko01240)	--	--	--	--	HMDB0304395	--	Organic compounds	Organic acids and derivatives	Hydroxy acids and derivatives	Beta hydroxy acids and derivatives
pos_1447	N-Carbamoylsarcosine	18.0596	13.1274	21.5293	25.4179	24.8392	16.576	15.1512	5.91938	14.1631	12.1083	20.5947	12.7836	0.620724	-0.687977	0.0302966	1.65424	down	C01043	Arginine and proline metabolism(ko00330);;Metabolic pathways(ko01100)	--	--	--	--	HMDB0012265	--	Organic compounds	Organic acids and derivatives	Carboxylic acids and derivatives	Amino acids, peptides, and analogues
pos_1657	Butanoylphosphate	4.13782	3.20067	9.75619	5.23876	7.34511	1.78754	3.54289	3.59817	1.08781	0.241497	5.93571	2.05158	0.345634	-1.53268	0.0268748	1.74993	down	C02527	Butanoate metabolism(ko00650);;Metabolic pathways(ko01100)	--	--	--	--	--	--	--	--	--	--
pos_2087	Trp Ser Gly	94.8118	666.515	409.435	604.387	433.871	264.678	159.945	92.8851	17.9402	146.152	441.804	136.32	0.308554	-1.69641	0.0339855	1.74726	down	--	--	--	--	--	--	--	--	--	--	--	--
pos_2134	5-Fluorodeoxyuridine monophosphate	190.984	118.392	224.281	223.145	213.091	309.589	249.375	218.668	234.542	260.021	193.979	254.439	1.31169	0.391423	0.0445534	1.58288	up	C04242	Drug metabolism - other enzymes(ko00983)	--	--	--	--	HMDB0060394	--	Organic compounds	Nucleosides, nucleotides, and analogues	Pyrimidine nucleotides	Pyrimidine deoxyribonucleotides
pos_2177	trans-Crocetin (beta-D-glucosyl) (beta-D-gentibiosyl) ester	45.6316	52.1553	21.7214	101.551	66.3683	6.31968	33.2165	9.81723e-08	9.81723e-08	13.0191	57.4855	10.5111	0.182847	-2.45129	0.0193748	1.85801	down	C17513	Metabolic pathways(ko01100)	--	--	--	--	--	--	--	--	--	--
pos_2215	Levanbiose	1.10773	13.9695	13.1905	10.7279	22.0796	4.7156	0.783993	6.01911	9.81723e-08	3.58185	12.215	3.02011	0.247245	-2.01598	0.0499947	1.69103	down	C01725	Starch and sucrose metabolism(ko00500)	--	--	--	--	--	--	--	--	--	--
pos_2332	Gabapentin	115.599	97.6433	87.0004	48.175	93.2103	157.788	125.117	188.655	153.166	159.692	88.3257	156.884	1.7762	0.82879	0.00187874	2.0589	up	C07018	--	--	--	--	--	HMDB0005015	60142-96-3	Organic compounds	Organic acids and derivatives	Carboxylic acids and derivatives	Amino acids, peptides, and analogues
pos_2342	Sophoraflavanone B	11.5021	8.03429	4.90473	13.5416	10.7477	1.14845	2.57663	9.81723e-08	9.81723e-08	9.81723e-08	9.74608	0.745015	0.0764425	-3.70948	0.00247579	2.18983	down	C18023	--	LMPK12140279	Polyketides [PK]	Flavonoids [PK12]	Flavanones [PK1214]	--	--	--	--	--	--
pos_2772	L-Histidine	134.411	93.1202	97.3583	62.3302	79.6842	109.568	119.85	131.416	134.504	138.282	93.3807	126.724	1.35707	0.440494	0.0466967	1.66267	up	C00135	Histidine metabolism(ko00340);;beta-Alanine metabolism(ko00410);;D-Amino acid metabolism(ko00470);;Aminoacyl-tRNA biosynthesis(ko00970);;Metabolic pathways(ko01100);;Biosynthesis of amino acids(ko01230);;ABC transporters(ko02010);;Protein digestion and absorption(ko04974);;Central carbon metabolism in cancer(ko05230)	--	--	--	--	HMDB0000177	71-00-1	Organic compounds	Organic acids and derivatives	Carboxylic acids and derivatives	Amino acids, peptides, and analogues
pos_3113	ENOXACIN	912.795	535.228	643.19	135.768	274.643	1210.21	955.29	807.064	798.437	1006.54	500.325	955.508	1.90978	0.933403	0.0259028	1.74117	up	C06979	--	--	--	--	--	HMDB0014610	74011-58-8	Organic compounds	Organoheterocyclic compounds	Diazanaphthalenes	Naphthyridines
pos_4310	dCDP	38.9972	31.3351	27.7305	7.76809	32.221	56.1189	40.9951	38.2241	34.0973	70.7342	27.6104	48.0339	1.7397	0.798843	0.0467221	1.54789	up	C00705	Pyrimidine metabolism(ko00240);;Metabolic pathways(ko01100);;Nucleotide metabolism(ko01232)	--	--	--	--	HMDB0001245	800-73-7	Organic compounds	Organic oxygen compounds	Organic oxoanionic compounds	Organic pyrophosphates
pos_5000	Traumatic acid	6.78905	55.086	40.3081	47.1049	56.0286	4.53024	14.4844	25.1729	9.81723e-08	15.5967	41.0633	11.9568	0.29118	-1.78002	0.0285808	1.78424	down	C16308	alpha-Linolenic acid metabolism(ko00592)	LMFA01170002	Fatty Acyls [FA]	Fatty Acids and Conjugates [FA01]	Dicarboxylic acids [FA0117]	HMDB0000933	6402-36-4	Organic compounds	Lipids and lipid-like molecules	Fatty Acyls	Fatty acids and conjugates
pos_5194	M1dG	42.3188	31.7137	41.5882	5.40528	17.057	105.458	62.6844	41.1807	42.0055	59.0572	27.6166	62.0772	2.24782	1.16853	0.0420145	1.58771	up	--	--	--	--	--	--	--	--	--	--	--	--
pos_5214	(5E)-4-[(E)-3-(4-hydroxyphenyl)prop-2-enoyl]oxy-2-methyl-5-[2-[(2R,3R,4S,5S,6R)-3,4,5-trihydroxy-6-(hydroxymethyl)oxan-2-yl]oxyethylidene]cyclopentene-1-carboxylic acid	111.401	203.799	100.125	192.929	162.57	27.4261	1.51428	89.2864	9.70537	26.5789	154.165	30.9022	0.200449	-2.31869	0.00185257	2.09797	down	--	--	--	--	--	--	--	--	--	--	--	--
pos_5303	Carboxyethylphosphoramide	24.4557	24.8223	37.8147	17.7852	27.74	16.0863	15.6942	9.96236	9.81723e-08	7.31021	26.5236	9.81061	0.369882	-1.43486	0.00539972	1.98421	down	--	--	--	--	--	--	HMDB0249660	--	Organic compounds	Organic acids and derivatives	Carboxylic acids and derivatives	Amino acids, peptides, and analogues
pos_5314	Capecitabine	304.532	201.019	154.702	133.535	193.476	44.599	6.39688	104.058	141.075	62.9545	197.453	71.8167	0.363716	-1.45912	0.0110502	1.80759	down	C12650	Drug metabolism - other enzymes(ko00983)	--	--	--	--	HMDB0015233	154361-50-9	Organic compounds	Nucleosides, nucleotides, and analogues	5'-deoxyribonucleosides	--
pos_5425	Asp Lys Ile Ser	162.766	192.726	195.344	434.263	264.401	186.159	107.222	64.5509	76.375	112.026	249.9	109.267	0.437241	-1.1935	0.0426251	1.64669	down	--	--	--	--	--	--	--	--	--	--	--	--
pos_5450	(E)-4,5-Dihydro-6-(2-(4-pyridinyl)ethenyl)-3(2H)-pyridazinone	15.8731	21.6096	42.8766	68.0528	43.0322	22.9777	3.32849	9.81723e-08	9.81723e-08	7.01931	38.2889	6.6651	0.174074	-2.52223	0.022803	1.7758	down	--	--	--	--	--	--	HMDB0253348	--	Organic compounds	Organoheterocyclic compounds	Diazines	Pyridazines and derivatives
pos_5457	Gln Ser His Thr	15.6805	17.9217	42.4257	60.0314	33.673	18.7698	9.81723e-08	9.81723e-08	9.81723e-08	9.81723e-08	33.9465	3.75396	0.110585	-3.17678	0.0170768	1.82516	down	--	--	--	--	--	--	--	--	--	--	--	--
pos_5473	Deoxyguanidinoproclavaminic acid	8.83551	4.23233	10.1143	7.11365	8.28634	19.6837	12.2162	9.3752	18.0279	17.496	7.71643	15.3598	1.99053	0.993153	0.0131449	1.93655	up	C06656	Metabolic pathways(ko01100)	--	--	--	--	--	--	--	--	--	--
pos_5728	trichostatin A	26.8154	23.8236	28.2314	31.3904	28.9256	26.7299	16.152	14.1327	14.5112	18.5288	27.8373	18.0109	0.647008	-0.628145	0.00922569	1.92792	down	--	--	--	--	--	--	HMDB0259177	--	Organic compounds	Organic oxygen compounds	Organooxygen compounds	Carbonyl compounds
pos_5776	3-Hydroxy-9,10-secoandrosta-1,3,5(10)-triene-9,17-dione	571.164	991.281	721.417	936.5	876.197	700.301	387.079	400.827	630.001	525.133	819.312	528.668	0.645259	-0.63205	0.0193015	1.73785	down	C19944	Metabolic pathways(ko01100)	--	--	--	--	--	--	--	--	--	--
pos_6192	6-Deoxocastasterone	40594.6	24058.6	25709.7	20239.5	28551.4	39250.4	39318.2	36853.9	35349.7	40464.3	27830.8	38247.3	1.37428	0.458677	0.0373272	1.71769	up	C15802	Metabolic pathways(ko01100)	LMST01030127	Sterol Lipids [ST]	Sterols [ST01]	Ergosterols and C24-methyl derivatives [ST0103]	HMDB0033984	87833-54-3	Organic compounds	Lipids and lipid-like molecules	Steroids and steroid derivatives	Bile acids, alcohols and derivatives
pos_6255	1,2-dihydroxyheptadec-16-yn-4-yl acetate	1006.67	1036.35	1642.07	2188.09	1705.29	1101.99	1025.78	444.845	676.454	815.83	1515.69	812.98	0.536375	-0.898687	0.031309	1.70052	down	--	--	LMFA05000645	Fatty Acyls [FA]	Fatty alcohols [FA05]	-	HMDB0031049	28884-46-0	Organic compounds	Lipids and lipid-like molecules	Fatty Acyls	Fatty alcohols
pos_6262	Chenodeoxycholate	21.0953	20.712	25.0155	41.3055	26.4257	25.7807	20.2167	7.07822	8.53931	13.3156	26.9108	14.9861	0.556881	-0.84456	0.0499869	1.54916	down	C02528	Primary bile acid biosynthesis(ko00120);;Metabolic pathways(ko01100);;Bile secretion(ko04976)	--	--	--	--	HMDB0000518	474-25-9	Organic compounds	Lipids and lipid-like molecules	Steroids and steroid derivatives	Bile acids, alcohols and derivatives
pos_6587	Hexadecanedioic acid mono-L-carnitine ester	225.433	261.515	386.608	504.875	352.374	314.346	246.792	103.532	157.505	190.572	346.161	202.549	0.585131	-0.773169	0.0497708	1.54479	down	--	--	LMFA07070007	Fatty Acyls [FA]	Fatty esters [FA07]	Fatty acyl carnitines [FA0707]	HMDB0000712	42150-38-9	Organic compounds	Lipids and lipid-like molecules	Fatty Acyls	Fatty acid esters
pos_6588	7-Sulfocholic acid	161.778	14.6642	167.202	35.3634	37.4326	134.631	278.693	170.644	313.712	216.139	83.288	222.764	2.67462	1.41933	0.017993	1.80097	up	--	--	LMST05020039	Sterol Lipids [ST]	Steroid conjugates [ST05]	Sulfates [ST0502]	HMDB0002421	60320-05-0	Organic compounds	Lipids and lipid-like molecules	Steroids and steroid derivatives	Bile acids, alcohols and derivatives
pos_6635	5,6,7,8-Tetrahydromonapterin	9.30224	2.29564	3.40756	7.19789	9.75436	10.0292	12.8809	8.46593	14.5205	12.6646	6.39154	11.7122	1.83246	0.873779	0.0237806	1.71973	up	C21007	Folate biosynthesis(ko00790)	--	--	--	--	--	--	--	--	--	--
pos_668	PS(20:5(5Z,8Z,11Z,14Z,17Z)/22:6(5Z,7Z,10Z,13Z,16Z,19Z)-OH(4))	44.0741	44.6592	53.5323	49.5848	47.2347	38.774	42.9245	36.4481	20.4239	41.0174	47.817	35.9176	0.751146	-0.412834	0.0384582	1.7251	down	--	--	--	--	--	--	HMDB0282849	--	--	--	--	--
pos_669	PA(16:1(9Z)/LTE4)	51.8723	49.6449	60.2407	58.2989	58.0983	41.494	38.3133	35.8717	13.0767	44.4994	55.631	34.651	0.622872	-0.682992	0.0164907	1.92304	down	--	--	--	--	--	--	HMDB0263404	--	--	--	--	--
pos_6730	Cholic Acid, Methyl Ester	228.01	295.916	488.088	617.17	402.21	320.903	229.501	99.2926	152.752	213.705	406.279	203.231	0.500225	-0.999351	0.0403309	1.61712	down	--	--	--	--	--	--	--	--	--	--	--	--
pos_6743	Nvp dpp 728 dihydrochloride	36.0418	21.3909	25.8028	3.00497	4.19883	34.6901	35.2432	30.7469	49.727	40.0883	18.0879	38.0991	2.10633	1.07473	0.0316428	1.76492	up	--	--	--	--	--	--	--	--	--	--	--	--
pos_6792	3-Hydroxy-9-hexadecenoylcarnitine	1579.5	1568.19	2979.41	3261.58	2439.41	1852.42	1651.43	526.019	1142.53	1341.96	2365.62	1302.87	0.550753	-0.860521	0.0388961	1.60306	down	--	--	--	--	--	--	HMDB0013333	--	Organic compounds	Lipids and lipid-like molecules	Fatty Acyls	Fatty acid esters
pos_6975	Olitoriusin	335.683	249.515	320.546	28.3672	23.9761	503.822	371.845	442.763	275.179	428.95	191.618	404.512	2.11104	1.07795	0.0344998	1.68158	up	--	--	--	--	--	--	HMDB0039542	125708-07-8	Organic compounds	Lipids and lipid-like molecules	Steroids and steroid derivatives	Steroid lactones
pos_6989	Edoxudine	13.254	13.1452	19.8436	6.17164	13.7595	25.5943	19.1331	19.091	29.514	24.2195	13.2348	23.5104	1.77641	0.828963	0.00829188	1.93022	up	--	--	--	--	--	--	HMDB0251705	--	Organic compounds	Nucleosides, nucleotides, and analogues	Pyrimidine nucleosides	Pyrimidine 2'-deoxyribonucleosides
pos_6990	Tryptophyl-Glycine	4.3603	2.15121	9.77724	9.81723e-08	0.000633437	19.3904	3.59302	9.49391	20.5014	20.8228	3.25788	14.7603	4.53065	2.17972	0.0264152	1.83912	up	--	--	--	--	--	--	HMDB0029083	--	Organic compounds	Organic acids and derivatives	Carboxylic acids and derivatives	Amino acids, peptides, and analogues
pos_7061	Cilengitide	23.0415	1.67338	43.1346	15.3572	7.91606	54.9789	50.435	32.1908	87.8886	83.9075	18.2245	61.8802	3.39543	1.76359	0.0109591	1.95624	up	--	--	--	--	--	--	HMDB0250242	--	Organic compounds	Organic acids and derivatives	Carboxylic acids and derivatives	Amino acids, peptides, and analogues
pos_7076	alpha-Methylstyrene	15248.7	4438.62	15381.3	8497.53	11537.9	13803.7	20048.2	13701.8	22791.1	18084.8	11020.8	17685.9	1.60478	0.682373	0.0415091	1.62755	up	C14395	--	--	--	--	--	HMDB0059899	--	Organic compounds	Benzenoids	Benzene and substituted derivatives	Phenylpropenes
pos_7100	alpha-1,5-L-Arabinobiose	147.43	51.3749	162.784	74.3003	102.042	132.658	221.138	133.578	247.222	170.563	107.586	181.032	1.68267	0.750749	0.047315	1.58735	up	C20570	ABC transporters(ko02010)	--	--	--	--	--	--	--	--	--	--
pos_7118	Clausarinol	815314	503758	743068	343133	584273	675847	856283	825088	998363	885472	597909	848211	1.41863	0.504496	0.0411671	1.65218	up	--	--	--	--	--	--	HMDB0041407	--	Organic compounds	Phenylpropanoids and polyketides	Coumarins and derivatives	Pyranocoumarins
pos_7213	Solasodiene (not validated)	10.5651	4.96019	16.2026	3.12257	1.56847	14.001	13.3615	27.4112	24.1757	16.1213	7.28378	19.0141	2.61048	1.38431	0.0174533	1.82625	up	--	--	--	--	--	--	--	--	--	--	--	--
pos_724	2R-Hydroxymethyl-3S-hydroxypyrolidine	537.363	1072.33	701.215	744.007	770.089	603.005	754.984	133.926	100.414	237.876	765	366.041	0.478485	-1.06345	0.039878	1.70581	down	--	--	--	--	--	--	HMDB0304601	--	Organic compounds	Organoheterocyclic compounds	Pyrrolidines	--
pos_7501	5.9-tetracosadienoic acid	5.39792	42.8778	28.3307	9.81723e-08	1.73185	97.3018	27.7023	118.842	210.97	111.833	15.6677	113.33	7.23336	2.85467	0.026359	1.89711	up	--	--	--	--	--	--	--	--	--	--	--	--
pos_7511	1-(3-Carboxypropylcarbamoyl)-5-fluorouracil	127.462	111.02	119.572	68.9566	100.412	128.541	132.342	144.012	152.039	152.161	105.484	141.819	1.34445	0.427021	0.0192928	1.85004	up	--	--	--	--	--	--	HMDB0243786	--	Organic compounds	Organic acids and derivatives	Carboxylic acids and derivatives	Amino acids, peptides, and analogues
pos_752	L-Carnitine	229.211	159.9	55.0693	124.99	130.67	340.735	423.762	262.163	136.784	275.26	139.968	287.741	2.05576	1.03967	0.033731	1.56971	up	C00318	Thermogenesis(ko04714);;Bile secretion(ko04976);;Diabetic cardiomyopathy(ko05415)	--	--	--	--	HMDB0000062	541-15-1	Organic compounds	Organic nitrogen compounds	Organonitrogen compounds	Quaternary ammonium salts
pos_7557	Phenylpropanoate	30.5809	18.9958	24.064	20.992	22.4302	38.2196	32.5361	27.5483	28.7271	33.2101	23.4126	32.0482	1.36885	0.452962	0.0133768	1.80323	up	C05629	Phenylalanine metabolism(ko00360);;Metabolic pathways(ko01100)	--	--	--	--	HMDB0000764	501-52-0	Organic compounds	Phenylpropanoids and polyketides	Phenylpropanoic acids	--
pos_7559	Guanidinoacetate	84.8136	53.047	63.1657	40.7767	54.9248	87.1312	90.0513	82.7853	93.0477	97.2984	59.3456	90.0628	1.5176	0.601791	0.0109054	1.99573	up	C00581	Glycine, serine and threonine metabolism(ko00260);;Arginine and proline metabolism(ko00330);;Metabolic pathways(ko01100)	--	--	--	--	HMDB0000128	352-97-6	Organic compounds	Organic acids and derivatives	Carboxylic acids and derivatives	Amino acids, peptides, and analogues
pos_7561	Levamisole	76.1673	55.6383	63.1116	40.892	56.6064	62.5279	70.2855	81.5654	83.1452	84.7369	58.4831	76.4522	1.30725	0.386537	0.0386306	1.65131	up	C07070	--	--	--	--	--	HMDB0014986	14769-73-4	Organic compounds	Organoheterocyclic compounds	Imidazothiazoles	--
pos_7582	Glu Gly Met Phe	132.641	77.0435	75.3282	63.5133	59.2829	124.547	121.206	156.459	145.412	147.764	81.5617	139.078	1.70518	0.769927	0.00829044	1.99432	up	--	--	--	--	--	--	--	--	--	--	--	--
pos_7615	Pedein B	73.3823	25.4037	36.3488	9.81723e-08	9.81723e-08	181.386	121.039	73.8734	57.0904	130.233	27.027	112.724	4.17081	2.06033	0.0138667	1.82458	up	--	--	--	--	--	--	--	--	--	--	--	--
pos_7672	Lucidenic acid D1	30.2533	23.9812	12.1572	14.9012	12.6902	56.1812	42.6915	34.6257	30.6387	44.3626	18.7966	41.7	2.21848	1.14957	0.00412262	1.95698	up	--	--	--	--	--	--	HMDB0038199	97653-95-7	Organic compounds	Lipids and lipid-like molecules	Prenol lipids	Triterpenoids
pos_769	Deoxyinosine	295.674	223.579	299.218	262.277	305.205	224.508	259.632	225.856	207.531	239.912	277.19	231.488	0.835122	-0.259942	0.0392183	1.66924	down	C05512	Purine metabolism(ko00230);;Metabolic pathways(ko01100);;Nucleotide metabolism(ko01232);;ABC transporters(ko02010)	--	--	--	--	HMDB0000071	890-38-0	Organic compounds	Nucleosides, nucleotides, and analogues	Purine nucleosides	Purine 2'-deoxyribonucleosides
pos_779	Daunosamine	121.042	103.463	72.1423	109.786	104.993	137.24	126.38	119.864	112.237	129.837	102.285	125.112	1.22316	0.290618	0.0472949	1.55087	up	--	--	--	--	--	--	HMDB0250880	--	Organic compounds	Organic nitrogen compounds	Organonitrogen compounds	Amines
pos_7856	Solasodine	2587.84	19286.2	17762	411.609	6436.78	34633.3	12033.1	50507.1	84927.5	46074.7	9296.89	45635.1	4.90865	2.29533	0.0346684	1.81905	up	C10822	--	LMST01150004	Sterol Lipids [ST]	Sterols [ST01]	Solanidines and alkaloid derivatives [ST0115]	HMDB0035282	126-17-0	Organic compounds	Lipids and lipid-like molecules	Steroids and steroid derivatives	Steroidal alkaloids
pos_7915	Diaminobutyric acid	10.4255	7.93115	4.06162	8.37706	2.71864	14.501	7.72799	23.872	31.0985	18.6281	6.7028	19.1655	2.85933	1.51568	0.0319796	1.83467	up	--	--	--	--	--	--	--	--	--	--	--	--
pos_7968	Oleoylcarnitine	815.737	7862.27	5472.45	200.344	2134.58	18265.1	4227.31	18294	36115.8	19996.3	3297.08	19379.7	5.87784	2.55529	0.0310456	1.85899	up	--	--	LMFA07070096	Fatty Acyls [FA]	Fatty esters [FA07]	Fatty acyl carnitines [FA0707]	HMDB0005065	38677-66-6	Organic compounds	Lipids and lipid-like molecules	Fatty Acyls	Fatty acid esters
pos_8059	Alpha-Linoleoylcholine	1885.51	21056.7	14291.2	645.877	6331.08	32579.7	9919.59	59033.4	90245.4	47810.8	8842.09	47917.8	5.41928	2.4381	0.0410392	1.78359	up	--	--	--	--	--	--	HMDB0013213	--	Organic compounds	Organic nitrogen compounds	Organonitrogen compounds	Quaternary ammonium salts
pos_8076	Ubiquinone-10	1.28169	144.483	79.9904	7.53634	12.9215	165.573	62.2685	283.715	315.798	200.777	49.2427	205.626	4.17577	2.06204	0.0223344	1.81299	up	C11378	Ferroptosis(ko04216)	LMPR02010001	Prenol Lipids [PR]	Quinones and hydroquinones [PR02]	Ubiquinones [PR0201]	HMDB0001072	303-98-0	Organic compounds	Lipids and lipid-like molecules	Prenol lipids	Quinone and hydroquinone lipids
pos_8077	PC(22:3(10Z,13Z,16Z)/20:3(6,8,11)-OH(5))	6.42386	207.217	73.5467	0.108977	17.341	152.223	114.105	281.235	185.074	141.435	60.9274	174.815	2.86923	1.52066	0.048999	1.54406	up	--	--	--	--	--	--	HMDB0288172	--	--	--	--	--
pos_8118	Methyl jasmonate	16.2497	19.6518	32.2417	33.4846	23.8146	12.8088	11.5422	4.86347	12.0106	14.6967	25.0885	11.1843	0.445796	-1.16555	0.0109896	1.87221	down	C11512	alpha-Linolenic acid metabolism(ko00592)	LMFA02020010	Fatty Acyls [FA]	Octadecanoids [FA02]	Jasmonic acids [FA0202]	HMDB0036583	1211-29-6	Organic compounds	Lipids and lipid-like molecules	Fatty Acyls	Lineolic acids and derivatives
pos_8341	MG(0:0/20:1(11Z)/0:0)	15747.2	22097.2	37374.5	36316.4	33563.5	16004	17608.2	13601	14741.8	15628.1	29019.7	15516.6	0.534692	-0.903219	0.0336013	1.78628	down	--	--	--	--	--	--	HMDB0011543	--	Organic compounds	Lipids and lipid-like molecules	Endocannabinoids	--
pos_839	4-Methylene-L-glutamate	64.7456	60.5515	49.7741	60.2717	57.853	77.2461	67.5726	75.6744	92.7299	87.6278	58.6392	80.1702	1.36718	0.451201	0.00516372	2.07081	up	C00651	C5-Branched dibasic acid metabolism(ko00660)	--	--	--	--	HMDB0029433	16804-57-2	Organic compounds	Organic acids and derivatives	Carboxylic acids and derivatives	Amino acids, peptides, and analogues
pos_8485	linoleyl-l-carnitine	3.34149	98.1253	67.8548	9.81723e-08	12.3331	189.302	69.4176	638.3	770.239	381.368	36.3309	409.725	11.2776	3.49539	0.0463527	1.77773	up	--	--	--	--	--	--	--	--	--	--	--	--
pos_8577	Trihexosylceramide (d18_1_16_0)	3462.38	3426.86	3673.81	4399.34	4130.58	2929.49	3801.51	3136.99	2750.68	3177.6	3818.59	3159.26	0.827335	-0.273456	0.0359571	1.67291	down	--	--	--	--	--	--	--	--	--	--	--	--
pos_863	5-Hydroxyectoine	1132.92	1298.1	991.797	942.86	1164.05	1311.06	1528.9	1513.88	1168.51	1461.16	1105.95	1396.7	1.2629	0.336743	0.0146815	1.69857	up	C16432	Glycine, serine and threonine metabolism(ko00260);;Metabolic pathways(ko01100)	--	--	--	--	--	--	--	--	--	--
pos_8804	1-Palmitoyl Lysophosphatidic Acid	236.467	237.809	185.413	246.148	201.383	138.967	201.205	161.464	211.28	169.764	221.444	176.536	0.797204	-0.326978	0.035626	1.59488	down	--	--	--	--	--	--	--	--	--	--	--	--
pos_910	(R)-3-hydroxybutyrylcarnitine	7360.08	6450.16	8186.92	10505.7	9240.06	7233.98	5656.54	2618.35	5578.5	5732.47	8348.59	5363.97	0.6425	-0.638232	0.0203286	1.71657	down	--	--	--	--	--	--	HMDB0062735	--	Organic compounds	Lipids and lipid-like molecules	Fatty Acyls	Fatty acid esters
pos_9286	(-)-Huperzine A (HupA)	1.01643	8.0361	9.37396	9.81723e-08	9.81723e-08	15.7197	11.0263	13.1848	24.5594	21.4407	3.6853	17.1862	4.66344	2.2214	0.0036124	2.0679	up	--	--	--	--	--	--	--	--	--	--	--	--
pos_9288	Alanylarginine	209.195	1102.51	989.493	46.8229	441.299	2303.1	906.834	965.231	2102.89	1697.21	557.864	1595.05	2.85921	1.51562	0.0211457	1.78343	up	--	--	--	--	--	--	HMDB0028681	16709-12-9	Organic compounds	Organic acids and derivatives	Carboxylic acids and derivatives	Amino acids, peptides, and analogues
pos_9303	LysoPA(20:4(8Z,11Z,14Z,17Z)/0:0)	154.518	154.304	183.244	164.476	136.141	144.684	237.326	365.165	421.196	378.451	158.537	309.364	1.95138	0.964491	0.0415977	1.81326	up	--	--	--	--	--	--	HMDB0114742	--	Organic compounds	Lipids and lipid-like molecules	Glycerophospholipids	Glycerophosphates
pos_9324	dehydroabietadienol	69.6843	74.7752	70.8496	54.9402	58.7048	92.2888	75.6386	121.172	166.509	109.958	65.7908	113.113	1.71929	0.78181	0.0353925	1.83804	up	--	--	LMPR0104050010	Prenol Lipids [PR]	Isoprenoids [PR01]	C20 isoprenoids (diterpenes) [PR0104]	--	--	--	--	--	--
pos_9395	3a,7b,21-Trihydroxy-5b-cholanoic acid	197.613	670.862	438.116	264.553	341.878	1012.26	452.166	603.135	927.849	779.026	382.604	754.887	1.97302	0.980407	0.0233935	1.74796	up	--	--	--	--	--	--	HMDB0013192	--	Organic compounds	Lipids and lipid-like molecules	Steroids and steroid derivatives	Androstane steroids
pos_9397	1β,3α,7α,12α-Tetrahydroxy-5β-cholan-24-oic Acid	940.067	3724.29	2485.72	616.516	1544.69	5836	2439.99	3387.68	5514.3	4525.64	1862.26	4340.72	2.33089	1.22088	0.0199738	1.77377	up	--	--	LMST04010114	Sterol Lipids [ST]	Bile acids and derivatives [ST04]	C24 bile acids, alcohols, and derivatives [ST0401]	HMDB0000307	80875-94-1	Organic compounds	Lipids and lipid-like molecules	Steroids and steroid derivatives	Bile acids, alcohols and derivatives
pos_9461	Calcitetrol	101.78	100.678	120.028	95.9172	91.0583	117.715	138.591	113.445	184.193	144.811	101.892	139.751	1.37155	0.455808	0.0365874	1.78288	up	C18231	Steroid biosynthesis(ko00100);;Metabolic pathways(ko01100);;Parathyroid hormone synthesis, secretion and action(ko04928)	LMST03020686	Sterol Lipids [ST]	Secosteroids [ST03]	Vitamin D3 and derivatives [ST0302]	HMDB0006228	56142-94-0	Organic compounds	Lipids and lipid-like molecules	Steroids and steroid derivatives	Vitamin D and derivatives
pos_9504	beta-Alanyl-L-lysine	10.6518	11.6942	26.058	54.2081	26.2113	39.5265	88.2824	54.5977	64.8597	62.7649	25.7647	62.0062	2.40664	1.26702	0.0117949	1.81642	up	C05341	beta-Alanine metabolism(ko00410);;Metabolic pathways(ko01100)	--	--	--	--	HMDB0060442	--	Organic compounds	Organic acids and derivatives	Peptidomimetics	Hybrid peptides
pos_952	Cystine-glutamate	27.1428	22.4726	32.119	30.8675	23.9902	18.8814	19.8043	13.7664	21.9779	27.4097	27.3184	20.3679	0.745575	-0.423574	0.0443806	1.46568	down	--	--	--	--	--	--	--	--	--	--	--	--
pos_9661	(S)-9-Hydroxy-10-undecenoic acid	641.67	964.258	839.051	273.688	589.008	1365.26	913.245	1198.09	1912.39	1427.37	661.535	1363.27	2.06077	1.04318	0.00968878	1.93838	up	--	--	LMFA01050436	Fatty Acyls [FA]	Fatty Acids and Conjugates [FA01]	Hydroxy fatty acids [FA0105]	HMDB0032662	--	Organic compounds	Organic acids and derivatives	Hydroxy acids and derivatives	Medium-chain hydroxy acids and derivatives
pos_990	7-Methyluric acid	242.415	353.195	177.352	326.032	290.986	185.884	221.274	225.272	79.8549	175.705	277.996	177.598	0.63885	-0.646452	0.0402111	1.67909	down	C16355	Caffeine metabolism(ko00232)	--	--	--	--	HMDB0011107	--	Organic compounds	Organoheterocyclic compounds	Imidazopyrimidines	Purines and purine derivatives
pos_991	12-Tridecene-4,6,8,10-tetraynal	900.618	1188.63	677.715	1188.01	1000.62	716.458	778.075	854.851	343.684	707.558	991.118	680.125	0.68622	-0.543257	0.0443214	1.63929	down	--	--	--	--	--	--	HMDB0038915	28789-45-9	Organic compounds	Lipids and lipid-like molecules	Fatty Acyls	Fatty aldehydes

## Sheet: Model_vs_H-YP.diff.annotation
Supplementary Table 3: Model_vs_H-YP.diff.annotation
#ID	name	B1	B2	B3	B4	B5	D1	D2	D3	D4	D5	B_Mean	D_Mean	Fold_change	log2FC	Pvalue	VIP	regulated	KEGG_annotation	KEGG_pathway_annotation	LM_ID(lipidmaps)	CATEGORY(lipidmaps)	MAIN_CLASS(lipidmaps)	SUB_CLASS	HMDB_ID	CAS	kingdom(HMDB)	super_class(HMDB)	HMDB_taxonomy	sub_class(HMDB)
neg_1100	Perfluoroheptanoic acid	80.5853	75.2586	91.5751	84.4116	79.9715	158.786	111.044	80.2345	136.666	117.797	82.3604	120.906	1.468	0.553857	0.0409865	1.50812	up	--	--	--	--	--	--	HMDB0256322	--	Organic compounds	Organohalogen compounds	Alkyl halides	Alkyl fluorides
neg_1313	2-Octynoic acid	35.2019	83.273	62.9202	171.678	66.1922	8.6735	38.0374	19.8038	7.26576	24.1551	83.8531	19.5871	0.233588	-2.09796	0.0489796	1.46679	down	--	--	LMFA01030577	Fatty Acyls [FA]	Fatty Acids and Conjugates [FA01]	Unsaturated fatty acids [FA0103]	HMDB0245278	--	Organic compounds	Lipids and lipid-like molecules	Fatty Acyls	Fatty acids and conjugates
neg_1386	C07493	19.5232	6.80708	9.81723e-08	42.5519	15.0542	32.4251	34.6284	77.3203	103.747	62.48	16.7873	62.1202	3.70043	1.88769	0.024164	1.5981	up	--	--	--	--	--	--	--	--	--	--	--	--
neg_1410	C75	71.0478	217.306	331.481	457.752	251.637	52.3562	61.6718	49.9218	31.8134	51.7983	265.845	49.5123	0.186245	-2.42473	0.0273915	1.63797	down	--	--	--	--	--	--	--	--	--	--	--	--
neg_1452	Pinometostat	835.726	1083.37	1027.09	874.47	934.565	1862.56	1398.76	1570.77	2464.49	3298.54	951.044	2119.02	2.2281	1.15582	0.0272149	1.73272	up	--	--	--	--	--	--	HMDB0256563	--	Organic compounds	Nucleosides, nucleotides, and analogues	5'-deoxyribonucleosides	--
neg_1460	Acoric acid	552.769	2382.3	1697.5	2432.2	1588.49	355.906	466.629	302.634	140.122	322.64	1730.65	317.586	0.183507	-2.44609	0.013557	1.74348	down	--	--	--	--	--	--	HMDB0038165	5956-06-09	Organic compounds	Lipids and lipid-like molecules	Prenol lipids	Monoterpenoids
neg_1495	milbemycin alpha10	51.0755	77.9558	189.13	124.251	121.072	82.0275	18.711	26.1983	50.8667	41.9195	112.697	43.9446	0.389937	-1.35869	0.0402062	1.47874	down	--	--	--	--	--	--	HMDB0254722	--	Organic compounds	Phenylpropanoids and polyketides	Macrolides and analogues	Milbemycins
neg_1498	(3beta,5alpha,6beta,7alpha,22E,24R)-Ergosta-8,22-diene-3,5,6,7-tetrol	248.923	159.752	245.694	276.885	222.379	436.014	353.102	466.671	498.78	427.081	230.726	436.329	1.89111	0.919234	0.000211359	1.99159	up	--	--	--	--	--	--	HMDB0032107	200942-15-0	Organic compounds	Lipids and lipid-like molecules	Steroids and steroid derivatives	Ergostane steroids
neg_1506	Tetradecanedioic acid	282.607	171.353	249.678	292.986	250.515	229.875	113.419	145.937	93.1224	141.873	249.428	144.845	0.58071	-0.784111	0.0108642	1.72459	down	--	--	LMFA01170018	Fatty Acyls [FA]	Fatty Acids and Conjugates [FA01]	Dicarboxylic acids [FA0117]	HMDB0000872	821-38-5	Organic compounds	Lipids and lipid-like molecules	Fatty Acyls	Fatty acids and conjugates
neg_1508	Hymenoxon	549.346	312.641	436.197	444.588	431.1	428.977	113.368	187.07	28.3525	207.457	434.774	193.045	0.444012	-1.17133	0.0185128	1.68788	down	C09482	--	--	--	--	--	HMDB0253305	--	Organic compounds	Organoheterocyclic compounds	Oxanes	--
neg_1521	C01844	866.172	525.179	701.841	856.157	740.32	1458.6	1315.25	1163.14	1513.77	1443.12	737.934	1378.78	1.86843	0.901824	8.81509e-05	2.00278	up	--	--	--	--	--	--	--	--	--	--	--	--
neg_1525	3-Oxotetradecanoic acid	36.7737	31.7751	59.9619	88.1322	55.3361	32.4001	11.4235	25.0252	1.24575	25.5505	54.3958	19.129	0.351664	-1.50773	0.020357	1.61017	down	--	--	--	--	--	--	HMDB0010730	--	Organic compounds	Lipids and lipid-like molecules	Fatty Acyls	Fatty acids and conjugates
neg_1568	1-Nonen-3-ol	64.9632	38.6234	60.1024	38.7444	51.6637	104.369	134.84	99.7167	145.754	112.399	50.8194	119.416	2.34981	1.23254	0.000406526	1.98788	up	--	--	LMFA05000504	Fatty Acyls [FA]	Fatty alcohols [FA05]	-	HMDB0034152	21964-44-3	Organic compounds	Lipids and lipid-like molecules	Fatty Acyls	Fatty alcohols
neg_1576	Pravastatin	3758.01	863.314	3802.19	2744.17	2842.72	8382.62	7618.67	7066.55	10426.8	7901.27	2802.08	8279.19	2.95466	1.56299	0.000119736	1.99587	up	C01844	Bile secretion(ko04976)	LMFA05000695	Fatty Acyls [FA]	Fatty alcohols [FA05]	-	HMDB0005022	81093-37-0	Organic compounds	Organic acids and derivatives	Hydroxy acids and derivatives	Medium-chain hydroxy acids and derivatives
neg_1578	24,24-Difluoro-1alpha,25-dihydroxyvitamin D3	55.7459	23.3876	68.7536	44.9974	46.3229	56.5303	87.9392	61.7807	117.222	93.0579	47.8415	83.306	1.74129	0.800158	0.0324435	1.51209	up	--	--	LMST03020145	Sterol Lipids [ST]	Secosteroids [ST03]	Vitamin D3 and derivatives [ST0302]	HMDB0242645	--	Organic compounds	Lipids and lipid-like molecules	Steroids and steroid derivatives	Vitamin D and derivatives
neg_1581	Pregnenolone-3,21-disulfate	460.309	81.0636	537.311	146.839	260.259	1312.88	1256.4	1072.4	1743.71	1344.14	297.156	1345.91	4.52929	2.17928	9.32477e-05	2.02951	up	--	--	--	--	--	--	HMDB0242133	--	Organic compounds	Lipids and lipid-like molecules	Steroids and steroid derivatives	Sulfated steroids
neg_1612	3-[(3aS,4S,7aS)-7a-Methyl-1,5-dioxo-octahydro-1H-inden-4-yl]propanoate	56.5081	46.1155	52.8502	45.2229	47.9643	77.6425	77.936	73.261	80.7615	77.9643	49.7322	77.5131	1.55861	0.640259	2.07914e-05	2.10248	up	C20199	Metabolic pathways(ko01100)	--	--	--	--	--	--	--	--	--	--
neg_1613	5-((6-((Aminomethyl)amino)-1-oxohexyl)amino)pentanoic acid	2100.71	1181.23	2097.84	2097.47	1864.82	1388.95	425.737	876.634	122.99	741.638	1868.42	711.189	0.380637	-1.39351	0.00339569	1.84753	down	--	--	--	--	--	--	HMDB0258266	--	Organic compounds	Lipids and lipid-like molecules	Fatty Acyls	Fatty amides
neg_1616	2,3-Dimethoxy-5-methyl-6-(9'-carboxynonyl)-1,4-benzoquinone	96.3225	55.9164	92.1538	151.552	97.9275	78.8236	21.3326	45.4266	9.81723e-08	38.0492	98.7745	36.7264	0.371821	-1.42732	0.0155075	1.65134	down	--	--	--	--	--	--	--	--	--	--	--	--
neg_1618	Propofol glucuronide	107.589	61.0363	106.324	96.2032	91.7417	68.371	26.259	45.4833	1.9699	38.5247	92.5789	36.1216	0.390171	-1.35782	0.00401104	1.83521	down	--	--	--	--	--	--	HMDB0060933	--	Organic compounds	Organic oxygen compounds	Organooxygen compounds	Carbohydrates and carbohydrate conjugates
neg_1632	Ciliatocholate	493.153	506.481	415.494	466.415	483.613	401.225	389.638	475.704	297.004	394.362	473.031	391.587	0.827824	-0.272604	0.0445054	1.45343	down	C05683	Phosphonate and phosphinate metabolism(ko00440)	--	--	--	--	--	--	--	--	--	--
neg_1637	PS(14:0/18:0)	74.7837	35.7906	101.216	77.0296	94.4309	61.5471	9.81723e-08	18.3762	9.81723e-08	11.5549	76.6502	18.2956	0.23869	-2.06679	0.00671859	1.779	down	--	--	LMGP03010928	Glycerophospholipids [GP]	Glycerophosphoserines [GP03]	Diacylglycerophosphoserines [GP0301]	HMDB0012334	--	Organic compounds	Lipids and lipid-like molecules	Glycerophospholipids	Glycerophosphoserines
neg_1649	PE(14:1(9Z)/22:5(4Z,7Z,10Z,13Z,16Z))	101.215	35.3654	98.6532	64.1992	75.6414	57.6107	7.57048	45.1176	9.81723e-08	27.616	75.0149	27.583	0.367699	-1.4434	0.0197569	1.61502	down	--	--	--	--	--	--	HMDB0008878	--	Organic compounds	Lipids and lipid-like molecules	Glycerophospholipids	Glycerophosphoethanolamines
neg_1650	LysoPE(0:0/18:3(6Z,9Z,12Z))	745.125	777.794	970.694	860.885	799.371	606.496	657.971	731.265	138.366	509.254	830.774	528.67	0.636359	-0.652087	0.0409461	1.50265	down	--	--	--	--	--	--	HMDB0011478	--	Organic compounds	Lipids and lipid-like molecules	Glycerophospholipids	Glycerophosphoethanolamines
neg_1654	2,3-Dinor-8-iso prostaglandin F2alpha	9.76912	13.4821	27.6759	11.9504	16.8603	37.8676	20.7747	28.9653	44.6296	29.2382	15.9476	32.2951	2.02508	1.01798	0.0145303	1.6284	up	C14794	Arachidonic acid metabolism(ko00590)	--	--	--	--	--	--	--	--	--	--
neg_1665	N-Palmitoyl Arginine	5922	4360.22	3814.23	3868.12	4019.51	7148.81	7683.25	5027	8679.73	6978.19	4396.82	7103.4	1.61558	0.692049	0.00703012	1.71226	up	--	--	--	--	--	--	HMDB0241920	--	Organic compounds	Lipids and lipid-like molecules	Steroids and steroid derivatives	Androstane steroids
neg_1682	C12272	87.298	83.205	43.1166	78.0011	69.7838	104.305	86.1821	97.934	131.701	85.9918	72.2809	101.223	1.40041	0.485848	0.0360281	1.40635	up	--	--	--	--	--	--	--	--	--	--	--	--
neg_1685	(S)-10,16-Dihydroxyhexadecanoic acid	137.294	76.2849	162.776	176.462	139.018	121.446	74.1991	87.0049	75.0468	90.7348	138.367	89.6862	0.648177	-0.625541	0.0451702	1.5029	down	--	--	--	--	--	--	HMDB0037798	69232-67-3	Organic compounds	Lipids and lipid-like molecules	Fatty Acyls	Fatty acids and conjugates
neg_1692	Contignasterol	207.839	196.693	141.697	299.823	185.03	163.682	115.907	117.497	62.6537	99.2207	206.216	111.792	0.54211	-0.883342	0.0186777	1.64356	down	C19902	--	--	--	--	--	HMDB0250439	--	Organic compounds	Lipids and lipid-like molecules	Prenol lipids	Triterpenoids
neg_1731	C16500	15.3363	23.368	19.2146	13.0591	15.1358	12.4691	4.87137	14.8912	9.81723e-08	8.90352	17.2228	8.22704	0.477684	-1.06587	0.0267893	1.49176	down	--	--	--	--	--	--	--	--	--	--	--	--
neg_1734	CPA(16:0/0:0)	8978.2	11318.5	5534.84	22193.3	6957.04	11409.4	28845.4	20705.2	26554.1	19624.9	10996.4	21427.8	1.94862	0.962456	0.0396564	1.45837	up	--	--	--	--	--	--	HMDB0007003	--	Organic compounds	Lipids and lipid-like molecules	Glycerophospholipids	Glycerophosphates
neg_1774	PE(15:0/20:3(8Z,11Z,14Z)-2OH(5,6))	67.6044	30.2682	64.4913	69.1528	65.1193	40.9622	3.41031	21.9652	9.81723e-08	23.3135	59.3272	17.9303	0.302226	-1.7263	0.00413792	1.82355	down	--	--	--	--	--	--	HMDB0260820	--	--	--	--	--
neg_1809	PS(22:5(4Z,7Z,10Z,13Z,16Z)/22:2(13Z,16Z))	56.2247	45.5292	32.3491	159.804	74.4049	146.795	192.826	189.279	138.788	194.998	73.6624	172.537	2.34227	1.22791	0.00808399	1.76281	up	--	--	--	--	--	--	HMDB0112833	--	Organic compounds	Lipids and lipid-like molecules	Glycerophospholipids	Glycerophosphoserines
neg_1818	C11134	148.887	258.17	333.945	241.358	367.423	854.25	839.511	544.586	1057.64	583.896	269.957	775.978	2.87445	1.52329	0.00372261	1.86026	up	--	--	--	--	--	--	--	--	--	--	--	--
neg_1864	Penitrem D	250400	213832	221417	186293	214957	217511	253814	266245	275497	252884	217380	253190	1.16474	0.220003	0.0357476	1.46302	up	C20596	--	--	--	--	--	HMDB0256240	--	Organic compounds	Organoheterocyclic compounds	Naphthopyrans	--
neg_1870	Sirolimus	157.721	155.366	127.837	358.123	169.265	208.665	407.08	268.657	436.464	342.038	193.662	332.581	1.71732	0.780161	0.0475688	1.41008	up	C07909	Longevity regulating pathway(ko04211);;Longevity regulating pathway - worm(ko04212);;Cellular senescence(ko04218)	LMPK06000003	Polyketides [PK]	Polyenes [PK06]	-	HMDB0015015	53123-88-9	Organic compounds	Benzenoids	Benzene and substituted derivatives	Benzoic acids and derivatives
neg_1873	L-Oleandrosyl-oleandolide	58.1821	37.4896	41.9201	37.1349	44.4844	52.1534	56.9495	64.1215	86.5715	67.9898	43.8422	65.5572	1.4953	0.580432	0.0184603	1.60243	up	C11992	Metabolic pathways(ko01100)	LMPK04000033	Polyketides [PK]	Macrolides and lactone polyketides [PK04]	-	--	--	--	--	--	--
neg_1884	PE(16:0/20:3(8Z,11Z,14Z)-2OH(5,6))	21.0752	164.682	147.389	136.449	120.023	32.14	47.1295	36.9453	26.0402	45.8327	117.924	37.6175	0.318999	-1.64838	0.0326569	1.54531	down	--	--	--	--	--	--	HMDB0260924	--	--	--	--	--
neg_1885	PS(18:0/18:2(9Z,12Z))	389.923	214.209	568.667	315.076	396.19	239.926	68.3834	180.12	25.6947	146.277	376.813	132.08	0.350519	-1.51243	0.00998665	1.71847	down	--	--	LMGP03010031	Glycerophospholipids [GP]	Glycerophosphoserines [GP03]	Diacylglycerophosphoserines [GP0301]	HMDB0012380	132014-81-4	Organic compounds	Lipids and lipid-like molecules	Glycerophospholipids	Glycerophosphoserines
neg_1891	2-[(L-Alanin-3-ylcarbamoyl)methyl]-3-(2-aminoethylcarbamoyl)-2-hydroxypropanoate	56.5836	37.1546	86.6848	46.5131	54.8551	38.7783	5.40292	25.7864	9.81723e-08	19.8287	56.3582	17.9593	0.318663	-1.6499	0.00810318	1.7134	down	C22074	Metabolic pathways(ko01100)	--	--	--	--	--	--	--	--	--	--
neg_1925	PC(20:2(11Z,14Z)/PGJ2)	1158.4	1217.99	974.504	1333.85	999.164	1299.59	1647.02	1272.88	1894.93	1295.9	1136.78	1482.06	1.30374	0.382653	0.0493767	1.42103	up	--	--	--	--	--	--	HMDB0287174	--	--	--	--	--
neg_1948	N-Glycoloylganglioside GM2	905.634	1196.94	959.201	911.158	1041.28	1122.15	1192.48	1115.03	1394.23	1159.67	1002.84	1196.71	1.19332	0.254981	0.0319008	1.51047	up	--	--	--	--	--	--	HMDB0000770	--	Organic compounds	Lipids and lipid-like molecules	Sphingolipids	Glycosphingolipids
neg_1972	C16143	1056.4	554.733	768.527	770.107	816.051	810.969	197.463	247.03	46.0692	361.692	793.164	332.645	0.41939	-1.25364	0.0206334	1.66644	down	--	--	--	--	--	--	--	--	--	--	--	--
neg_1993	5-Methoxytryptamine	13.2662	33.2281	63.9966	35.1852	41.7532	81.9339	131.214	73.8967	114.93	55.7301	37.4859	91.5409	2.44201	1.28807	0.0133041	1.655	up	C05659	Tryptophan metabolism(ko00380)	--	--	--	--	HMDB0004095	608-07-1	Organic compounds	Organoheterocyclic compounds	Indoles and derivatives	Tryptamines and derivatives
neg_2038	Tenofovir exalidex	8426.46	6739.68	5554.76	4502.53	6107.43	6724.32	9194.32	8569.87	8438.49	8387.75	6266.17	8262.95	1.31866	0.399073	0.0372857	1.46873	up	--	--	--	--	--	--	HMDB0250380	--	Organic compounds	Organoheterocyclic compounds	Imidazopyrimidines	Purines and purine derivatives
neg_2042	PC(15:0/P-16:0)	455.904	278.578	353.711	302.557	392.757	389.052	200.349	229.304	115.545	203.223	356.701	227.495	0.637773	-0.648885	0.0495581	1.49351	down	--	--	--	--	--	--	HMDB0007961	--	Organic compounds	Lipids and lipid-like molecules	Glycerophospholipids	Glycerophosphocholines
neg_2152	8-[(1R,2R)-3-Oxo-2-{(Z)-pent-2-enyl}cyclopentyl]octanoate	173.38	206.011	198.373	233.132	204.722	185.764	121.29	121.282	96.3903	123.463	203.123	129.638	0.638221	-0.647871	0.00452686	1.82621	down	C22503	--	--	--	--	--	--	--	--	--	--	--
neg_2185	3-Oxohexadecanoic acid	890.358	558.943	768.981	813.645	762.665	838.236	369.068	432.024	215.729	446.503	758.918	460.312	0.606537	-0.721333	0.0423005	1.54149	down	--	--	--	--	--	--	HMDB0010733	--	Organic compounds	Lipids and lipid-like molecules	Fatty Acyls	Fatty acids and conjugates
neg_2188	PI(20:5(5Z,8Z,11Z,14Z,17Z)/0:0)	166.542	107.994	46.4813	101.816	108.174	112.847	206.636	169.704	327.828	226.136	106.201	208.63	1.96448	0.974147	0.0431327	1.46597	up	--	--	LMGP06050026	Glycerophospholipids [GP]	Glycerophosphoinositols [GP06]	Monoacylglycerophosphoinositols [GP0605]	--	--	--	--	--	--
neg_2216	C11999	43.1377	43.4852	88.7481	87.4002	64.5088	38.7695	26.9211	45.4961	7.53138	27.3187	65.456	29.2074	0.446214	-1.16419	0.0193534	1.58859	down	--	--	--	--	--	--	--	--	--	--	--	--
neg_2231	11-Dehydro-thromboxane B2	146.391	104.817	204.334	163.489	169.31	135.937	34.7874	19.7099	127.195	85.2901	157.668	80.5837	0.511097	-0.968331	0.0303092	1.53879	down	C05964	Arachidonic acid metabolism(ko00590);;Metabolic pathways(ko01100);;Serotonergic synapse(ko04726)	LMFA03030014	Fatty Acyls [FA]	Eicosanoids [FA03]	Thromboxanes [FA0303]	HMDB0004242	67910-12-7	Organic compounds	Lipids and lipid-like molecules	Fatty Acyls	Eicosanoids
neg_2236	C11961	9230.43	11273.6	11555.7	6537.72	15454.5	23723.1	16576.3	15477.8	38760.1	33894.6	10810.4	25686.4	2.37608	1.24858	0.0296562	1.62455	up	--	--	--	--	--	--	--	--	--	--	--	--
neg_2254	(Z)-9-Cycloheptadecen-1-one	1801.59	1096.87	1420.66	2877.84	1824.81	1513.76	637.662	676.776	422.938	877.849	1804.35	825.798	0.45767	-1.12762	0.0289972	1.58028	down	--	--	--	--	--	--	HMDB0031336	542-46-1	Organic compounds	Organic oxygen compounds	Organooxygen compounds	Carbonyl compounds
neg_2255	3alpha,11beta,21-Trihydroxy-20-oxo-5beta-pregnan-18-al	216.672	126.222	157.803	195.777	176.114	180.138	68.0106	73.6796	43.3349	108.677	174.518	94.768	0.543028	-0.880901	0.0266134	1.60892	down	C05474	Steroid hormone biosynthesis(ko00140)	LMST02030275	Sterol Lipids [ST]	Steroids [ST02]	C21 steroids (gluco/mineralocorticoids, progestogins) and derivatives [ST0203]	HMDB0006753	--	Organic compounds	Lipids and lipid-like molecules	Steroids and steroid derivatives	Hydroxysteroids
neg_2270	6-Phenylhexyl isothiocyanate	51.776	79.6515	237.289	67.536	176.706	569.63	523.021	175.262	535.265	439.928	122.592	448.621	3.65947	1.87164	0.00681499	1.76434	up	--	--	--	--	--	--	HMDB0247105	--	Organic compounds	Benzenoids	Benzene and substituted derivatives	--
neg_2339	Thromboxane B2	1706.65	2538.61	5143.9	3888.94	4131.08	10651.4	9100.68	4701.8	9624.67	6266.3	3481.84	8068.96	2.31745	1.21254	0.0105159	1.67263	up	C05963	Arachidonic acid metabolism(ko00590);;Metabolic pathways(ko01100);;Serotonergic synapse(ko04726);;Bile secretion(ko04976)	LMFA03030002	Fatty Acyls [FA]	Eicosanoids [FA03]	Thromboxanes [FA0303]	HMDB0003252	54397-85-2	Organic compounds	Lipids and lipid-like molecules	Fatty Acyls	Eicosanoids
neg_2386	LysoPA(0:0/18:0)	788.118	792.444	712.511	704.597	734.652	756.868	959.476	826.569	890.14	809.289	746.464	848.468	1.13665	0.184787	0.0414446	1.47076	up	--	--	--	--	--	--	HMDB0007850	--	Organic compounds	Lipids and lipid-like molecules	Glycerophospholipids	Glycerophosphates
neg_2418	Icosanoic acid	101.489	118.138	82.1063	99.2223	96.9412	103.87	65.0122	74.411	40.549	69.5659	99.5794	70.6817	0.709802	-0.49451	0.0458043	1.46811	down	C06425	Biosynthesis of unsaturated fatty acids(ko01040)	LMFA01010020	Fatty Acyls [FA]	Fatty Acids and Conjugates [FA01]	Straight chain fatty acids [FA0101]	HMDB0002212	506-30-9	Organic compounds	Lipids and lipid-like molecules	Fatty Acyls	Fatty acids and conjugates
neg_2426	Petasitenine	65.524	52.0852	54.1202	25.1	46.9341	65.2075	84.7963	73.6896	129.433	79.4475	48.7527	86.5148	1.77456	0.827464	0.0250363	1.56419	up	C10359	--	--	--	--	--	HMDB0030328	60102-37-6	Organic compounds	Organoheterocyclic compounds	Azaspirodecane derivatives	--
neg_2467	20-Hydroxy-6Z,15Z-eicosadienoic acid	74.1321	74.0389	76.342	77.9048	74.2455	75.0264	46.9119	44.9282	39.8848	46.5537	75.3327	50.661	0.672497	-0.5724	0.0160377	1.81964	down	--	--	LMFA03000010	Fatty Acyls [FA]	Eicosanoids [FA03]	Other Eicosanoids [FA0300]	HMDB0245564	--	Organic compounds	Lipids and lipid-like molecules	Fatty Acyls	Fatty acids and conjugates
neg_2494	C17960	280.198	162.193	190.748	104.122	198.127	233.813	266.174	226.02	349.936	305.215	187.077	276.232	1.47656	0.562242	0.0427056	1.4033	up	--	--	--	--	--	--	--	--	--	--	--	--
neg_2541	7alpha-Hydroxydehydroepiandrosterone	2629.79	1927.92	1567.62	2306.47	2239.29	1416.83	2231.79	1257.11	1376.74	1357.01	2134.22	1527.89	0.715904	-0.482163	0.0435987	1.48455	down	C18045	Steroid hormone biosynthesis(ko00140)	--	--	--	--	--	--	--	--	--	--
neg_2565	C02033	808.666	831.106	781.042	365.47	636.463	963.076	1004.31	846.437	969.951	861.876	684.549	929.13	1.35729	0.440726	0.0449995	1.4858	up	--	--	--	--	--	--	--	--	--	--	--	--
neg_2572	Glycohyocholate	247.017	367.663	370.425	177.846	270.219	379.457	522.221	368.033	420.851	345.699	286.634	407.252	1.42081	0.506714	0.038037	1.46532	up	--	--	--	--	--	--	HMDB0242179	--	Organic compounds	Lipids and lipid-like molecules	Steroids and steroid derivatives	Bile acids, alcohols and derivatives
neg_2607	Filipin II	54.9218	38.6116	70.2304	65.3321	72.396	146.895	122.4	132.312	131.803	126.289	60.2984	131.94	2.18812	1.12969	2.82835e-05	2.06144	up	--	--	--	--	--	--	HMDB0242297	--	Organic compounds	Phenylpropanoids and polyketides	Macrolides and analogues	--
neg_2609	SM(d16:1/20:3(8Z,11Z,14Z)-2OH(5,6))	468.797	464.059	404.058	393.533	442.987	556.363	590.953	471.071	515.376	515.168	434.687	529.786	1.21878	0.285434	0.00665264	1.68876	up	--	--	--	--	--	--	HMDB0290273	--	--	--	--	--
neg_2628	Ecabet	75304.5	55649.4	59172.2	46692.3	60094.3	70919.2	74956.1	65677.5	81087.9	71237.5	59382.6	72775.7	1.22554	0.293417	0.0431264	1.402	up	--	--	--	--	--	--	HMDB0015613	86408-72-2	Organic compounds	Lipids and lipid-like molecules	Prenol lipids	Diterpenoids
neg_2658	C06633	731.657	435.141	392.242	543.534	631.762	1165.74	998.767	738.621	1260.61	520.074	546.867	936.762	1.71296	0.776491	0.0437135	1.36149	up	--	--	--	--	--	--	--	--	--	--	--	--
neg_2678	(R)-Mevalonate	104.231	60.0683	62.8567	41.7096	66.0971	92.2092	118.943	98.7427	121.439	102.632	66.9924	106.793	1.59411	0.672748	0.0135732	1.63951	up	C00418	Terpenoid backbone biosynthesis(ko00900);;Metabolic pathways(ko01100);;Ferroptosis(ko04216)	--	--	--	--	HMDB0000227	17817-88-8	Organic compounds	Lipids and lipid-like molecules	Fatty Acyls	Fatty acids and conjugates
neg_2713	Galaxolide	1610.36	1539	1497.81	1311.09	1550.51	1818.33	1778.35	1449.46	1761.38	1676.28	1501.75	1696.76	1.12985	0.17613	0.0495421	1.32934	up	--	--	--	--	--	--	--	--	--	--	--	--
neg_2784	n-octyl-beta-D-thioglucopyranoside	921.455	695.128	731.244	277.613	530.537	925.023	894.238	897.697	1073.88	885.99	631.195	935.365	1.48189	0.567443	0.0454817	1.48841	up	--	--	--	--	--	--	HMDB0255216	--	Organic compounds	Organic oxygen compounds	Organooxygen compounds	Carbohydrates and carbohydrate conjugates
neg_2786	(S)-6-Hydroxynicotine	460.523	653.584	1479.94	755.596	1117.17	3259.22	2116.48	1375.35	2822.03	1766.58	893.365	2267.93	2.53864	1.34406	0.0120161	1.65655	up	C01056	Nicotinate and nicotinamide metabolism(ko00760);;Metabolic pathways(ko01100)	--	--	--	--	--	--	--	--	--	--
neg_2787	Reduced riboflavin	89.8178	88.4022	89.8046	22.7051	66.8021	101.824	105.316	100.067	127.733	113.029	71.5064	109.594	1.53264	0.616023	0.0393179	1.53988	up	C01007	Riboflavin metabolism(ko00740);;Metabolic pathways(ko01100)	--	--	--	--	HMDB0001557	101652-10-2	Organic compounds	Organoheterocyclic compounds	Pteridines and derivatives	Alloxazines and isoalloxazines
neg_2789	Panaquinquecol 5	547.187	546.46	556.121	391.896	479.435	577.702	684.258	604.022	663.024	588.232	504.22	623.447	1.23646	0.306215	0.0159021	1.6358	up	--	--	--	--	--	--	HMDB0039356	122122-03-6	Organic compounds	Organoheterocyclic compounds	Epoxides	--
neg_2798	8,8a-Deoxyoleandolide	101.384	125.859	96.4232	139.593	105.958	160.087	215.364	181.755	237.028	182.083	113.843	195.263	1.71519	0.77837	0.00170778	1.92456	up	C11989	Metabolic pathways(ko01100)	LMPK04000030	Polyketides [PK]	Macrolides and lactone polyketides [PK04]	-	--	--	--	--	--	--
neg_2805	Ginsenoside C-K	1925.67	1899.2	1861.76	1515.63	1797.02	2207.37	2277.18	1910.48	2204.99	2036.61	1799.85	2127.32	1.18194	0.24116	0.0115	1.61591	up	C22127	--	--	--	--	--	HMDB0252724	--	Organic compounds	Lipids and lipid-like molecules	Prenol lipids	Triterpenoids
neg_2806	(15S)-15-Hydroxy-5,8,11-cis-13-trans-eicosatetraenoate	42736.4	45347.8	42516.1	32179.7	38328.8	47341.7	52697.4	43116.6	48737.6	45131	40221.8	47404.8	1.17859	0.237058	0.0375196	1.45921	up	C04742	Arachidonic acid metabolism(ko00590);;Metabolic pathways(ko01100);;Inflammatory mediator regulation of TRP channels(ko04750)	--	--	--	--	HMDB0003876	54845-95-3	Organic compounds	Lipids and lipid-like molecules	Fatty Acyls	Eicosanoids
neg_2859	Oleandolide	77.2538	65.8013	70.037	47.4593	56.7699	81.6038	73.9054	72.4429	89.1483	74.7479	63.4642	78.3697	1.23486	0.304351	0.0457923	1.41377	up	C11990	Metabolic pathways(ko01100)	LMPK04000031	Polyketides [PK]	Macrolides and lactone polyketides [PK04]	-	--	--	--	--	--	--
neg_2886	Lanabecestat	1826.96	1709.75	1367.79	1331.33	1974.01	1723.9	2308.78	2023.18	2509.57	1946.34	1641.97	2102.35	1.28039	0.356579	0.0398111	1.39406	up	--	--	--	--	--	--	HMDB0253964	--	Organic compounds	Benzenoids	Indanes	--
neg_470	(+/-)-3-[(2-methyl-3-furyl)thio]-2-butanone	82.4006	137.694	110.692	123.921	193.926	54.2533	92.9591	72.4093	91.3197	32.321	129.727	68.6525	0.529209	-0.91809	0.0274816	1.57303	down	--	--	--	--	--	--	HMDB0032401	61295-44-1	Organic compounds	Organosulfur compounds	Thioethers	Aryl thioethers
neg_515	Nicotinate D-ribonucleotide	5688.2	5757.33	5178.8	4302.81	4954.47	2145.83	3087.33	3615.84	3990.61	3313.22	5176.32	3230.57	0.624105	-0.680139	0.00152359	1.83472	down	C01185	Nicotinate and nicotinamide metabolism(ko00760);;Metabolic pathways(ko01100);;Biosynthesis of cofactors(ko01240)	--	--	--	--	HMDB0001132	321-02-8	Organic compounds	Nucleosides, nucleotides, and analogues	Pyridine nucleotides	Nicotinic acid nucleotides
neg_521	dTDP	89.7652	89.9828	88.8742	59.9078	81.1086	22.2317	35.657	44.7851	65.0573	48.2586	81.9277	43.1979	0.527269	-0.923389	0.00308494	1.77355	down	C00363	Pyrimidine metabolism(ko00240);;Metabolic pathways(ko01100);;Nucleotide metabolism(ko01232)	--	--	--	--	HMDB0001274	491-97-4	Organic compounds	Nucleosides, nucleotides, and analogues	Pyrimidine nucleotides	Pyrimidine deoxyribonucleotides
neg_522	6-Thioxanthine 5'-monophosphate	402.459	410.923	325.805	241.085	318.701	106.274	169.479	188.265	218.707	175.224	339.794	171.59	0.504981	-0.985698	0.00284541	1.83541	down	C16618	Drug metabolism - other enzymes(ko00983)	--	--	--	--	HMDB0060418	--	Organic compounds	Organoheterocyclic compounds	Diazines	Pyrimidines and pyrimidine derivatives
neg_53	dTDP-4-oxo-alpha-D-xylose	123.3	125.159	150.335	99.5772	125.723	160.419	132.953	164.77	134.262	175.121	124.819	153.505	1.22982	0.298449	0.0395791	1.479	up	C21351	Polyketide sugar unit biosynthesis(ko00523)	--	--	--	--	--	--	--	--	--	--
neg_618	Alanyltyrosine	22.1553	50.4542	51.5203	59.4204	37.1947	33.996	11.0754	21.4639	28.3409	21.1045	44.149	23.1961	0.525406	-0.928495	0.0306051	1.47696	down	--	--	--	--	--	--	HMDB0028699	3061-88-9	Organic compounds	Organic acids and derivatives	Carboxylic acids and derivatives	Amino acids, peptides, and analogues
neg_648	L-3,4-Dihydroxybutan-2-one 4-phosphate	812.357	824.803	584.346	520.041	647.467	812.143	1218.3	753.163	1073.74	864.98	677.803	944.466	1.39342	0.478633	0.0399067	1.43389	up	C15556	Riboflavin metabolism(ko00740);;Metabolic pathways(ko01100);;Biosynthesis of cofactors(ko01240)	--	--	--	--	--	--	--	--	--	--
neg_656	Ethyl beta-D-glucopyranoside	219.184	157.232	457.12	375.354	311.111	141.956	145.271	231.845	21.3066	154.637	304	139.003	0.457248	-1.12895	0.036216	1.46367	down	--	--	--	--	--	--	HMDB0029968	3198-49-0	Organic compounds	Organic oxygen compounds	Organooxygen compounds	Carbohydrates and carbohydrate conjugates
neg_680	Aflatoxin B1 diol	25.4943	38.7996	136.744	99.9224	76.5159	32.5191	14.544	33.7367	6.97536	9.81723e-08	75.4952	17.555	0.232532	-2.1045	0.0431024	1.50042	down	C19588	Metabolism of xenobiotics by cytochrome P450(ko00980)	--	--	--	--	HMDB0060430	--	Organic compounds	Phenylpropanoids and polyketides	Coumarins and derivatives	Furanocoumarins
neg_702	CDP	45.1332	52.7459	57.4288	52.8525	55.6934	55.2406	63.5824	58.9985	62.9769	64.2407	52.7708	61.0079	1.15609	0.209256	0.0168768	1.66446	up	C00112	Pyrimidine metabolism(ko00240);;Metabolic pathways(ko01100);;Nucleotide metabolism(ko01232);;Biosynthesis of cofactors(ko01240)	--	--	--	--	HMDB0001546	63-38-7	Organic compounds	Nucleosides, nucleotides, and analogues	Pyrimidine nucleotides	Pyrimidine ribonucleotides
neg_727	1-Methylinosine	23.8589	43.5268	37.7238	41.0196	34.2773	40.302	44.5922	50.2594	45.3227	52.1284	36.0813	46.5209	1.28934	0.36663	0.0374577	1.5881	up	--	--	--	--	--	--	HMDB0002721	2140-73-0	Organic compounds	Nucleosides, nucleotides, and analogues	Purine nucleosides	--
neg_736	Apigenin 7-di-O-xyloside	6.32564	14.4268	13.7862	18.2814	15.1977	20.8384	26.6405	67.1692	33.4771	45.2918	13.6035	38.6834	2.84363	1.50773	0.0357811	1.64164	up	--	--	--	--	--	--	HMDB0302800	--	Organic compounds	Phenylpropanoids and polyketides	Flavonoids	Flavonoid glycosides
neg_737	3-Maleimidobenzoic acid N-hydroxysuccinimide ester	6.61155	14.8214	20.1102	22.6159	18.2609	25.0169	43.1049	35.267	24.5831	33.6342	16.484	32.3212	1.96076	0.971416	0.00789415	1.74401	up	--	--	--	--	--	--	HMDB0246994	--	Organic compounds	Benzenoids	Benzene and substituted derivatives	Benzoic acids and derivatives
neg_791	Tetracenomycin D3	7132.93	9366.02	8215.41	7117.69	7172.1	10742.4	10921.7	7304.43	10146.2	10001.1	7800.83	9823.15	1.25924	0.332559	0.0372625	1.4831	up	C12368	Metabolic pathways(ko01100)	--	--	--	--	--	--	--	--	--	--
neg_797	Hippurate	10733	11704.2	10377.1	10146.1	10175.8	11662.6	12931.8	10488.1	12284.4	12135.7	10627.2	11900.5	1.11981	0.163256	0.0371775	1.48861	up	C01586	--	--	--	--	--	HMDB0000714	495-69-2	Organic compounds	Benzenoids	Benzene and substituted derivatives	Benzoic acids and derivatives
neg_807	2'-Deoxy-5'-O-thiophosphonouridine	53.0661	40.8551	46.2224	61.6911	53.1401	75.5325	105.122	82.9492	83.1495	97.3041	50.995	88.8115	1.74157	0.800392	0.00065247	1.96616	up	--	--	--	--	--	--	HMDB0251638	--	Organic compounds	Nucleosides, nucleotides, and analogues	Pyrimidine nucleosides	Pyrimidine 2'-deoxyribonucleosides
neg_809	Glucoiberverin	18.5971	40.4578	35.6855	19.4909	29.9646	66.1401	61.8213	21.4438	48.5886	61.8804	28.8392	51.9748	1.80223	0.849783	0.046107	1.45553	up	C08412	2-Oxocarboxylic acid metabolism(ko01210)	--	--	--	--	HMDB0304681	--	Organic compounds	Organic oxygen compounds	Organooxygen compounds	Carbohydrates and carbohydrate conjugates
neg_819	Hexanitrohexaazaisowurtzitane	1581.74	1954.83	1659.49	1449.69	1536.34	2230.35	2362.11	1576.2	1981.16	2003.05	1636.42	2030.57	1.24087	0.311347	0.0436086	1.4331	up	--	--	--	--	--	--	HMDB0253147	--	Organic compounds	Organoheterocyclic compounds	Diazinanes	Piperazines
neg_826	GDP-L-fucose	942.337	1399.58	1241.57	941.559	1071.36	2131.42	1931.88	1057.58	1640.67	1729.86	1119.28	1698.28	1.5173	0.601506	0.0294954	1.5436	up	C00325	Fructose and mannose metabolism(ko00051);;Amino sugar and nucleotide sugar metabolism(ko00520);;Metabolic pathways(ko01100);;Biosynthesis of nucleotide sugars(ko01250)	--	--	--	--	HMDB0001095	15839-70-0	Organic compounds	Nucleosides, nucleotides, and analogues	Purine nucleotides	Purine nucleotide sugars
neg_841	(S)-3-Sulfolactate	48.072	50.7507	50.5787	46.3443	43.5413	65.441	76.9789	54.5185	65.5052	69.4544	47.8574	66.3796	1.38703	0.471997	0.00475926	1.89234	up	C11499	Cysteine and methionine metabolism(ko00270);;Metabolic pathways(ko01100)	--	--	--	--	HMDB0060176	--	Organic compounds	Organic acids and derivatives	Hydroxy acids and derivatives	Alpha hydroxy acids and derivatives
neg_847	UDP-2,3-diacetamido-2,3-dideoxy-alpha-D-glucuronate	911.056	1295.62	1043.2	864.145	807.78	1704.89	1480.66	950.254	1536.75	1208.32	984.36	1376.17	1.39804	0.483406	0.0437419	1.42043	up	C19725	Amino sugar and nucleotide sugar metabolism(ko00520);;Metabolic pathways(ko01100);;Biosynthesis of nucleotide sugars(ko01250)	--	--	--	--	--	--	--	--	--	--
neg_856	2-Hydroxy-1,4-benzoxazin-3-one sulfate	150.718	184.609	167.752	159.948	176.774	214.161	230.435	156.835	198.826	215.408	167.96	203.133	1.20941	0.274307	0.0472285	1.45407	up	--	--	--	--	--	--	HMDB0240439	--	Organic compounds	Organoheterocyclic compounds	Benzoxazines	Benzoxazinones
neg_868	5-(3-Hydroxybenzoyl)-2-thiophenesulfonamide	48.4686	54.899	46.122	45.6986	44.2855	56.0017	59.7911	52.5148	50.5538	56.5708	47.8947	55.0864	1.15016	0.20183	0.0202473	1.59783	up	--	--	--	--	--	--	HMDB0246719	--	Organic compounds	Organic oxygen compounds	Organooxygen compounds	Carbonyl compounds
pos_1009	7,8-Dihydro-7,8-dihydroxykynurenate	625.757	646.626	716.219	835.938	786.77	613.607	493.575	554.933	597.718	419.535	722.262	535.873	0.741938	-0.43063	0.00861603	1.74441	down	C01249	Tryptophan metabolism(ko00380)	--	--	--	--	--	--	--	--	--	--
pos_10168	PC(18_3(9Z,12Z,15Z)_20_0)	59382.6	91227.2	74630.1	34838.9	72130.6	110900	77584.2	110984	75601.1	112381	66441.9	97490.2	1.4673	0.553164	0.0404158	1.46771	up	--	--	--	--	--	--	--	--	--	--	--	--
pos_1021	Cyanuric acid	70.8076	76.409	63.3155	89.8516	73.7212	52.2973	47.6405	59.1308	34.4798	57.6393	74.821	50.2375	0.671436	-0.574677	0.00418821	1.75782	down	C06554	Metabolic pathways(ko01100)	--	--	--	--	HMDB0041861	108-80-5	Organic compounds	Organoheterocyclic compounds	Triazines	1,3,5-triazines
pos_1024	4-Thialysine	211.055	129.484	485.833	529.446	386.35	98.8473	42.4456	134.319	9.60579	87.1984	348.434	74.4832	0.213766	-2.2259	0.0215654	1.67887	down	--	--	--	--	--	--	HMDB0029178	--	Organic compounds	Organic acids and derivatives	Carboxylic acids and derivatives	Amino acids, peptides, and analogues
pos_10299	PG 17_0-18_1-d5	124960	115031	104282	44436.1	72910.3	183988	148171	136991	130261	126431	92324	145168	1.57238	0.652947	0.0217692	1.53143	up	--	--	--	--	--	--	--	--	--	--	--	--
pos_1035	3,4-Dihydro-7-methoxy-2-methylene-3-oxo-2H-1,4-benzoxazine-5-carboxylic acid	20.6236	24.9599	71.2123	61.1909	64.5326	10.0476	4.11117	15.8867	0.0539689	8.48787	48.5039	7.71747	0.15911	-2.6519	0.016596	1.73224	down	C11468	Metabolic pathways(ko01100)	--	--	--	--	--	--	--	--	--	--
pos_10373	C16 Sphinganine	17517.6	15058.4	19359.9	8555.71	15069.8	18263.9	25648.7	20060.3	35610.9	21066.4	15112.3	24130	1.59672	0.675107	0.0440772	1.44737	up	--	--	LMSP01040001	Sphingolipids [SP]	Sphingoid bases [SP01]	Sphingoid base homologs and variants [SP0104]	--	--	--	--	--	--
pos_1038	alpha-D-Ribose 1-methylphosphonate 5-phosphate	112.87	98.4203	124.832	132.22	125.351	78.5478	54.7325	101.905	6.20885	82.6583	118.739	64.8104	0.545824	-0.873493	0.0272316	1.60353	down	C20423	Phosphonate and phosphinate metabolism(ko00440);;Metabolic pathways(ko01100)	--	--	--	--	--	--	--	--	--	--
pos_10399	Dextran-70	225.882	200.388	197.322	8.92029	119.427	240.741	315.436	331.075	268.233	295.051	150.388	290.107	1.92906	0.947899	0.0204903	1.67423	up	--	--	--	--	--	--	HMDB0256672	--	Organic compounds	Organic oxygen compounds	Organooxygen compounds	Carbohydrates and carbohydrate conjugates
pos_10400	Estrone glucuronide	119.683	101.515	107.108	7.12299	60.1774	132.062	156.08	159.838	144.266	163.338	79.1212	151.117	1.90994	0.933527	0.022488	1.69945	up	C11133	Steroid hormone biosynthesis(ko00140)	--	--	--	--	HMDB0004483	2479-90-5	Organic compounds	Lipids and lipid-like molecules	Steroids and steroid derivatives	Steroidal glycosides
pos_1044	Difluorodeoxyuridine	491.825	399.591	927.052	1108.11	807.821	284.229	180.163	417.977	22.2959	265.553	746.879	234.044	0.313362	-1.6741	0.0139871	1.68838	down	--	--	--	--	--	--	--	--	--	--	--	--
pos_1045	Methylcysteine	21.7323	20.3652	34.4403	40.7238	32.1961	10.3822	6.39091	16.5105	9.81723e-08	12.3716	29.8916	9.13105	0.305473	-1.71089	0.00309688	1.81678	down	--	--	--	--	--	--	HMDB0002108	1187-84-4	Organic compounds	Organic acids and derivatives	Carboxylic acids and derivatives	Amino acids, peptides, and analogues
pos_1046	4-Hydroxy-6-methyl-3-(1H-pyrazol-3-yl)-2H-pyran-2-one	120.91	120.912	145.066	119.037	116.799	159.651	249.059	214.361	255.784	229.53	124.545	221.677	1.7799	0.831794	0.00342529	1.9725	up	--	--	--	--	--	--	--	--	--	--	--	--
pos_10639	Avermectin B1b monosaccharide	320.337	178.257	308.405	9.38409	140.387	720.758	429.746	682.323	877.094	814.747	191.354	704.934	3.68392	1.88124	0.00088439	1.94259	up	C11965	Metabolic pathways(ko01100)	--	--	--	--	--	--	--	--	--	--
pos_10694	PC(16:0/20:5(5E,8E,11E,14E,17E))[U]	442903	789816	1.18544e+06	36654.4	420589	1.42885e+06	1.26113e+06	719295	1.24417e+06	1.2486e+06	575080	1.18041e+06	2.0526	1.03745	0.0340915	1.52083	up	--	--	--	--	--	--	--	--	--	--	--	--
pos_10770	3-Ethyl-4-(9-hydroxy-4,6,8,10-tetramethyl-7-oxododec-4-en-2-yl)oxetan-2-one	1421.02	948.662	803.486	346.563	611.183	1869.67	1882.43	1660.43	2234.79	1536.48	826.184	1836.76	2.22319	1.15263	0.00228517	1.83754	up	--	--	--	--	--	--	HMDB0251673	--	Organic compounds	Lipids and lipid-like molecules	Prenol lipids	Terpene lactones
pos_10785	Diethyl decanedioate	4317.07	3702.31	3868.52	2544.99	3207.05	4658.65	4166.1	4026.91	4750.89	4483.73	3527.99	4417.26	1.25206	0.324305	0.0397335	1.48623	up	--	--	--	--	--	--	HMDB0040429	110-40-7	Organic compounds	Lipids and lipid-like molecules	Fatty Acyls	Fatty acid esters
pos_11020	Daidzin	61329.2	57336.2	55597.8	32613.1	56193.2	57778.3	79157.2	62872.2	71379	86934.3	52613.9	71624.2	1.36132	0.445003	0.032271	1.51378	up	C10216	Metabolic pathways(ko01100)	LMPK12050013	Polyketides [PK]	Flavonoids [PK12]	Isoflavonoids [PK1205]	HMDB0033991	552-66-9	Organic compounds	Phenylpropanoids and polyketides	Isoflavonoids	Isoflavonoid O-glycosides
pos_11317	Icosenoic acid	343.622	309.108	287.935	46.6617	159.721	333.619	417.463	400.396	414.597	365.204	229.41	386.256	1.6837	0.751631	0.044589	1.53507	up	C16526	Biosynthesis of unsaturated fatty acids(ko01040)	--	--	--	--	--	--	--	--	--	--
pos_11492	PC(14:0/20:2(11Z,14Z))	126065	328697	466573	14732.6	141944	556468	532865	374223	505900	488926	215602	491676	2.28048	1.18934	0.0228754	1.67144	up	--	--	LMGP01011373	Glycerophospholipids [GP]	Glycerophosphocholines [GP01]	Diacylglycerophosphocholines [GP0101]	HMDB0007880	--	Organic compounds	Lipids and lipid-like molecules	Glycerophospholipids	Glycerophosphocholines
pos_11498	PC(P-18:1(11Z)/18:3(10,12,15)-OH(9))	1879.43	7193.84	7197.43	5899.39	1795.59	10552.9	8424.16	7577.18	9385.36	10634	4793.14	9314.72	1.94334	0.958542	0.0171435	1.73678	up	--	--	--	--	--	--	HMDB0289721	--	--	--	--	--
pos_11501	PG(18_0_22_4(7Z,10Z,13Z,16Z))	20395.7	16278.4	24650.8	7557.14	9198.21	25334.6	23413.8	20895.7	32240.7	31713.5	15616.1	26719.7	1.71104	0.774872	0.0257855	1.58501	up	--	--	--	--	--	--	--	--	--	--	--	--
pos_11550	Acarbose 7IV-phosphate	809.365	643.644	1093.33	580.429	303.957	1261.94	932.922	832.132	1516.43	1375.3	686.144	1183.74	1.72521	0.786772	0.0271375	1.54901	up	C21156	Metabolic pathways(ko01100)	--	--	--	--	--	--	--	--	--	--
pos_1167	GDP-4-dehydro-6-deoxy-D-mannose	9.81723e-08	2.16754	1.75862	9.81723e-08	3.25124	3.70042	7.32137	15.079	6.19563	18.2659	1.43548	10.1125	7.04466	2.81653	0.0339518	1.67547	up	C01222	Fructose and mannose metabolism(ko00051);;Amino sugar and nucleotide sugar metabolism(ko00520);;Metabolic pathways(ko01100);;Biosynthesis of nucleotide sugars(ko01250)	--	--	--	--	HMDB0001346	18186-48-6	Organic compounds	Nucleosides, nucleotides, and analogues	Purine nucleotides	Purine nucleotide sugars
pos_11753	PC(18:4(2E,4E,6E,11Z)/18:1(11Z))[U]	220256	568131	942671	133861	420731	1.09011e+06	943028	587126	883116	892430	457130	879162	1.92322	0.943525	0.0408182	1.48872	up	--	--	--	--	--	--	--	--	--	--	--	--
pos_12083	1-Monostearin	904.882	709.851	606.643	917.357	759.436	1317.59	1689.28	1280.1	1564.25	875.782	779.634	1345.4	1.72568	0.787165	0.0119427	1.67008	up	--	--	--	--	--	--	HMDB0011131	22610-61-3	Organic compounds	Lipids and lipid-like molecules	Glycerolipids	Monoradylglycerols
pos_12085	MG(0:0/20:2(11Z,14Z)/0:0)	824.988	875.125	852.552	479.53	616.977	1015.26	1025.43	950.166	1056.62	989.49	729.834	1007.39	1.3803	0.464985	0.0214821	1.71812	up	--	--	--	--	--	--	HMDB0011544	--	Organic compounds	Lipids and lipid-like molecules	Endocannabinoids	--
pos_12237	Rutin	70977.8	66006.3	59196.1	45188.4	66692.7	68344.7	80528.9	73958.2	74890.8	87776.4	61612.3	77099.8	1.25137	0.32351	0.0265339	1.54628	up	C05625	Metabolic pathways(ko01100)	LMPK12112098	Polyketides [PK]	Flavonoids [PK12]	Flavones and Flavonols [PK1211]	HMDB0003249	153-18-4	Organic compounds	Phenylpropanoids and polyketides	Flavonoids	Flavonoid glycosides
pos_12299	Rhizocticin C	8875.84	5564.84	4959.02	1730.37	4921.59	2551.52	3054.23	2985.45	35.9743	975.041	5210.33	1920.44	0.368583	-1.43994	0.0424886	1.50994	down	C17960	Phosphonate and phosphinate metabolism(ko00440)	--	--	--	--	--	--	--	--	--	--
pos_1356	N-acetyl zonisamide	36.8628	44.4208	45.8303	9.04186	32.4424	30.4529	9.82597	5.47508	13.8382	13.7693	33.7196	14.6723	0.435126	-1.20049	0.0472308	1.42244	down	--	--	--	--	--	--	HMDB0060603	68936-43-6	Organic compounds	Organoheterocyclic compounds	Benzisoxazoles	--
pos_1633	(2R,3R,4S,5S,6R)-2-[1,7-bis(4-hydroxyphenyl)heptan-3-yloxy]-6-[[(2S,3R,4R)-3,4-dihydroxy-4-(hydroxymethyl)oxolan-2-yl]oxymethyl]oxane-3,4,5-triol	5.12701	28.8023	27.6396	24.4052	23.1981	21.7342	9.81723e-08	3.89261	2.0058	5.38528	21.8345	6.60357	0.302438	-1.72529	0.0305852	1.46835	down	--	--	--	--	--	--	--	--	--	--	--	--
pos_1725	Prunasin	6.40646	3.82281	11.5949	4.36664	12.6872	2.39194	1.18913	0.652544	4.51728	9.81723e-08	7.7756	1.75018	0.225086	-2.15145	0.0269575	1.63638	down	C00844	Metabolic pathways(ko01100)	--	--	--	--	HMDB0034934	99-18-3	Organic compounds	Organic oxygen compounds	Organooxygen compounds	Carbohydrates and carbohydrate conjugates
pos_1755	Melibiitol	15.9683	67.7698	79.7459	80.6785	55.8037	31.7185	6.56131	18.1678	26.7515	14.7175	59.9933	19.5833	0.326426	-1.61517	0.0239121	1.58472	down	C05399	Galactose metabolism(ko00052)	--	--	--	--	HMDB0006791	--	Organic compounds	Lipids and lipid-like molecules	Fatty Acyls	Fatty acyl glycosides
pos_2131	Clavulanate-9-aldehyde	31.1344	26.1945	27.7994	29.3869	29.774	36.6526	28.5887	32.1901	36.4153	33.6653	28.8578	33.5024	1.16095	0.215301	0.033178	1.44585	up	C06661	Metabolic pathways(ko01100)	--	--	--	--	--	--	--	--	--	--
pos_2772	L-Histidine	134.411	93.1202	97.3583	62.3302	79.6842	131.615	141.334	126.248	166.95	154.377	93.3807	144.105	1.5432	0.625924	0.00935074	1.71652	up	C00135	Histidine metabolism(ko00340);;beta-Alanine metabolism(ko00410);;D-Amino acid metabolism(ko00470);;Aminoacyl-tRNA biosynthesis(ko00970);;Metabolic pathways(ko01100);;Biosynthesis of amino acids(ko01230);;ABC transporters(ko02010);;Protein digestion and absorption(ko04974);;Central carbon metabolism in cancer(ko05230)	--	--	--	--	HMDB0000177	71-00-1	Organic compounds	Organic acids and derivatives	Carboxylic acids and derivatives	Amino acids, peptides, and analogues
pos_3113	ENOXACIN	912.795	535.228	643.19	135.768	274.643	998.625	853.868	660.103	992.721	885.789	500.325	878.221	1.7553	0.811719	0.0487364	1.43232	up	C06979	--	--	--	--	--	HMDB0014610	74011-58-8	Organic compounds	Organoheterocyclic compounds	Diazanaphthalenes	Naphthyridines
pos_4174	1-Guanidino-1-deoxy-scyllo-inositol 4-phosphate	33.6827	22.1773	15.8131	9.81723e-08	5.95588	36.2476	38.9755	24.7937	38.8043	45.0891	15.5258	36.782	2.36909	1.24434	0.0193702	1.62735	up	C01294	--	--	--	--	--	--	--	--	--	--	--
pos_5000	Traumatic acid	6.78905	55.086	40.3081	47.1049	56.0286	9.81723e-08	14.3898	4.2016	9.81723e-08	9.81723e-08	41.0633	3.71827	0.0905498	-3.46515	0.0119872	1.74608	down	C16308	alpha-Linolenic acid metabolism(ko00592)	LMFA01170002	Fatty Acyls [FA]	Fatty Acids and Conjugates [FA01]	Dicarboxylic acids [FA0117]	HMDB0000933	6402-36-4	Organic compounds	Lipids and lipid-like molecules	Fatty Acyls	Fatty acids and conjugates
pos_53	FA 13_3+1O	17.3526	18.1951	14.8447	21.6632	14.8442	19.1482	19.4978	25.7982	24.5721	21.9611	17.38	22.1955	1.27707	0.352839	0.030303	1.53052	up	--	--	--	--	--	--	--	--	--	--	--	--
pos_5303	Carboxyethylphosphoramide	24.4557	24.8223	37.8147	17.7852	27.74	8.20315	24.9554	20.754	11.6835	13.7296	26.5236	15.8651	0.598151	-0.741417	0.0443922	1.37376	down	--	--	--	--	--	--	HMDB0249660	--	Organic compounds	Organic acids and derivatives	Carboxylic acids and derivatives	Amino acids, peptides, and analogues
pos_5346	3-hydroxy-C10-homoserine lactone	81.4539	127.014	142.173	38.2072	59.0681	159.786	243.673	102.87	230.843	166.077	89.5832	180.65	2.01656	1.0119	0.024314	1.56433	up	--	--	--	--	--	--	--	--	--	--	--	--
pos_5473	Deoxyguanidinoproclavaminic acid	8.83551	4.23233	10.1143	7.11365	8.28634	26.4756	10.9237	11.9378	24.8635	19.5871	7.71643	18.7576	2.43086	1.28147	0.023314	1.61752	up	C06656	Metabolic pathways(ko01100)	--	--	--	--	--	--	--	--	--	--
pos_5597	gamma-Aminobutyryllysine	7.55222	1.95224	9.81723e-08	20.2799	5.21995	15.7733	7.4679	32.8545	32.8071	22.201	7.00086	22.2208	3.17401	1.66631	0.039423	1.45875	up	--	--	--	--	--	--	HMDB0001959	22468-02-6	Organic compounds	Organic acids and derivatives	Peptidomimetics	Hybrid peptides
pos_5602	Decarbamoylsaxitoxin	63.5105	34.7818	8.49174	120.75	66.0347	86.6549	79.8055	171.02	224.36	145.484	58.7137	141.465	2.4094	1.26867	0.0392977	1.45969	up	C20021	--	--	--	--	--	HMDB0038319	58911-04-9	Organic compounds	Phenylpropanoids and polyketides	Saxitoxins, gonyautoxins, and derivatives	--
pos_5606	Cervonoyl ethanolamide	16.9817	6.86708	1.39269	29.4968	4.45485	22.2265	15.2636	40.8674	51.2639	36.9701	11.8386	33.3183	2.81438	1.49281	0.0331569	1.4995	up	--	--	--	--	--	--	HMDB0013627	--	Organic compounds	Lipids and lipid-like molecules	Fatty Acyls	Fatty acid esters
pos_5630	1-Deoxy-11beta-hydroxypentalenate	7.1366	2.26285	9.81723e-08	16.2648	6.39559	18.6674	9.28354	37.7323	36.1194	28.6131	6.41197	26.0831	4.06788	2.02428	0.0176028	1.66261	up	C20403	Metabolic pathways(ko01100)	--	--	--	--	--	--	--	--	--	--
pos_5642	Urocortisol	178.257	126.333	314.45	260.049	242.365	136.67	47.0517	106.658	17.7277	84.9834	224.291	78.6183	0.35052	-1.51243	0.00759557	1.75215	down	C05472	Steroid hormone biosynthesis(ko00140)	LMST02030143	Sterol Lipids [ST]	Steroids [ST02]	C21 steroids (gluco/mineralocorticoids, progestogins) and derivatives [ST0203]	HMDB0000949	1953-02-01	Organic compounds	Lipids and lipid-like molecules	Steroids and steroid derivatives	Hydroxysteroids
pos_5728	trichostatin A	26.8154	23.8236	28.2314	31.3904	28.9256	20.645	17.9307	8.8281	6.86132	16.0146	27.8373	14.0559	0.504932	-0.985838	0.00386761	1.89984	down	--	--	--	--	--	--	HMDB0259177	--	Organic compounds	Organic oxygen compounds	Organooxygen compounds	Carbonyl compounds
pos_5776	3-Hydroxy-9,10-secoandrosta-1,3,5(10)-triene-9,17-dione	571.164	991.281	721.417	936.5	876.197	586.587	602.746	638.501	410.653	598.308	819.312	567.359	0.692482	-0.530151	0.0267858	1.52244	down	C19944	Metabolic pathways(ko01100)	--	--	--	--	--	--	--	--	--	--
pos_6245	7-Methylxanthine	1.42142	2.75708	1.04486	5.24052	1.39496	9.81723e-08	9.81723e-08	0.485725	9.81723e-08	9.81723e-08	2.37177	0.097145	0.0409589	-4.60968	0.0418899	1.53884	down	C16353	Caffeine metabolism(ko00232);;Metabolic pathways(ko01100)	--	--	--	--	HMDB0001991	552-62-5	Organic compounds	Organoheterocyclic compounds	Imidazopyrimidines	Purines and purine derivatives
pos_6255	1,2-dihydroxyheptadec-16-yn-4-yl acetate	1006.67	1036.35	1642.07	2188.09	1705.29	794.791	478.778	750.621	238.262	628.406	1515.69	578.172	0.381457	-1.39041	0.00992305	1.76198	down	--	--	LMFA05000645	Fatty Acyls [FA]	Fatty alcohols [FA05]	-	HMDB0031049	28884-46-0	Organic compounds	Lipids and lipid-like molecules	Fatty Acyls	Fatty alcohols
pos_6310	L-2,4-Diaminobutanoate	52.1145	45.562	59.939	86.8763	59.1169	38.4031	35.3722	41.911	34.9504	46.4901	60.7218	39.4253	0.649279	-0.623091	0.0362544	1.546	down	C03283	Glycine, serine and threonine metabolism(ko00260);;Metabolic pathways(ko01100);;2-Oxocarboxylic acid metabolism(ko01210);;Biosynthesis of amino acids(ko01230)	--	--	--	--	HMDB0006284	1758-80-1	Organic compounds	Organic acids and derivatives	Carboxylic acids and derivatives	Amino acids, peptides, and analogues
pos_6395	N-Arachidonyl dopamine	26.6367	16.0372	21.4692	26.2413	22.2418	54.2847	38.1211	53.9296	60.7929	48.0072	22.5252	51.0271	2.26533	1.17972	0.000578	1.98586	up	--	--	--	--	--	--	--	--	--	--	--	--
pos_6433	N6-(L-1,3-Dicarboxypropyl)-L-lysine	109.246	55.6648	95.398	62.4263	95.8484	80.2665	21.5585	39.944	9.81723e-08	48.5113	83.7166	38.056	0.454582	-1.13739	0.0293206	1.56184	down	C00449	Lysine biosynthesis(ko00300);;Lysine degradation(ko00310);;Metabolic pathways(ko01100);;Biosynthesis of amino acids(ko01230)	--	--	--	--	HMDB0000279	997-68-2	Organic compounds	Organic acids and derivatives	Carboxylic acids and derivatives	Amino acids, peptides, and analogues
pos_6477	delta-Tocotrienol	131.157	169.444	380.91	410.342	300.341	109.285	42.8828	95.8288	36.5315	75.6587	278.439	72.0374	0.258719	-1.95054	0.0185905	1.70249	down	C14156	Ubiquinone and other terpenoid-quinone biosynthesis(ko00130);;Metabolic pathways(ko01100)	LMPR02020056	Prenol Lipids [PR]	Quinones and hydroquinones [PR02]	Vitamin E [PR0202]	HMDB0030008	25612-59-3	Organic compounds	Lipids and lipid-like molecules	Prenol lipids	Quinone and hydroquinone lipids
pos_6587	Hexadecanedioic acid mono-L-carnitine ester	225.433	261.515	386.608	504.875	352.374	200.726	129.015	203.36	102.881	174.166	346.161	162.029	0.468075	-1.09519	0.0165099	1.67879	down	--	--	LMFA07070007	Fatty Acyls [FA]	Fatty esters [FA07]	Fatty acyl carnitines [FA0707]	HMDB0000712	42150-38-9	Organic compounds	Lipids and lipid-like molecules	Fatty Acyls	Fatty acid esters
pos_6588	7-Sulfocholic acid	161.778	14.6642	167.202	35.3634	37.4326	769.446	674.95	650.659	954.476	899.614	83.288	789.829	9.4831	3.24536	3.76983e-05	2.10941	up	--	--	LMST05020039	Sterol Lipids [ST]	Steroid conjugates [ST05]	Sulfates [ST0502]	HMDB0002421	60320-05-0	Organic compounds	Lipids and lipid-like molecules	Steroids and steroid derivatives	Bile acids, alcohols and derivatives
pos_6615	3-Phenyl-2-propenyl	144.819	79.775	113.529	99.2474	115.802	233.588	188.251	174.155	238.877	226.975	110.635	212.369	1.91956	0.940773	0.000363682	1.94161	up	--	--	--	--	--	--	--	--	--	--	--	--
pos_6622	Armillarin	140446	101438	119769	27297.2	69535.4	161212	161713	149041	169371	175664	91697	163400	1.78196	0.833463	0.0208639	1.70962	up	--	--	--	--	--	--	HMDB0039380	83329-14-0	Organic compounds	Organic oxygen compounds	Organooxygen compounds	Carbohydrates and carbohydrate conjugates
pos_6633	3-Dimethylallyl-4-hydroxymandelic acid	229.452	136.441	208.408	186.033	205.943	357.59	276.65	288.227	378.245	316.903	193.255	323.523	1.67407	0.74336	0.000960552	1.86945	up	C12457	--	--	--	--	--	HMDB0000822	1198-84-1	Organic compounds	Benzenoids	Phenols	1-hydroxy-2-unsubstituted benzenoids
pos_6635	5,6,7,8-Tetrahydromonapterin	9.30224	2.29564	3.40756	7.19789	9.75436	22.2066	18.372	17.4862	21.804	16.5042	6.39154	19.2746	3.01564	1.59247	0.000197926	1.94332	up	C21007	Folate biosynthesis(ko00790)	--	--	--	--	--	--	--	--	--	--
pos_6636	16-Methylheptadecanoic acid	41428.1	51141.2	59243.1	38380.1	41619.9	68008.6	66020.4	68211.1	68006	63260.9	46362.5	66701.4	1.43869	0.52476	0.00510733	1.94134	up	--	--	--	--	--	--	HMDB0031066	2724-58-5	Organic compounds	Lipids and lipid-like molecules	Fatty Acyls	Fatty acids and conjugates
pos_6718	LysoPC 16-2	27.0168	22.8861	31.7426	45.0368	26.197	20.6835	11.834	17.5176	9.81723e-08	12.39	30.5759	12.485	0.40833	-1.29219	0.00883187	1.69778	down	--	--	--	--	--	--	--	--	--	--	--	--
pos_6730	Cholic Acid, Methyl Ester	228.01	295.916	488.088	617.17	402.21	145.18	111.863	174.199	63.2157	119.892	406.279	122.87	0.302428	-1.72534	0.012731	1.75992	down	--	--	--	--	--	--	--	--	--	--	--	--
pos_6745	N-Docosahexaenoyl Lysine	539.108	426.607	548.08	9.90796	72.5808	531.194	935.007	647.642	1613.35	1013.42	319.257	948.122	2.96978	1.57035	0.0264236	1.58782	up	--	--	--	--	--	--	HMDB0242018	--	--	--	--	--
pos_6746	Miltefosine	82.6183	75.9553	94.4116	9.81723e-08	6.07698	93.5988	175.332	116.782	256.928	184.159	51.8124	165.36	3.19151	1.67424	0.0136215	1.69482	up	--	--	--	--	--	--	HMDB0254735	--	Organic compounds	Organic nitrogen compounds	Organonitrogen compounds	Quaternary ammonium salts
pos_6792	3-Hydroxy-9-hexadecenoylcarnitine	1579.5	1568.19	2979.41	3261.58	2439.41	1076.8	570.082	1003.78	308.976	788.628	2365.62	749.653	0.316895	-1.65792	0.0069025	1.81706	down	--	--	--	--	--	--	HMDB0013333	--	Organic compounds	Lipids and lipid-like molecules	Fatty Acyls	Fatty acid esters
pos_6988	Morinidazole	9.63695	17.989	8.85885	7.38721	11.6293	1.1064	1.348	6.19691	9.81723e-08	2.24598	11.1003	2.17946	0.196343	-2.34855	0.00511124	1.76602	down	--	--	--	--	--	--	HMDB0254886	--	Organic compounds	Organoheterocyclic compounds	Azoles	Imidazoles
pos_7049	(±)-Myristoylcarnitine	5966.03	7866.54	12025.4	11135.2	9855.31	5322.27	2767.87	4633.65	2607.45	4150.18	9369.69	3896.28	0.415839	-1.2659	0.00464767	1.82702	down	--	--	--	--	--	--	--	--	--	--	--	--
pos_7061	Cilengitide	23.0415	1.67338	43.1346	15.3572	7.91606	49.2953	67.1235	25.2646	49.2114	59.9171	18.2245	50.1624	2.75246	1.46072	0.0132974	1.63502	up	--	--	--	--	--	--	HMDB0250242	--	Organic compounds	Organic acids and derivatives	Carboxylic acids and derivatives	Amino acids, peptides, and analogues
pos_7067	1-(2-Furyl)butan-3-one	12.5093	9.81723e-08	11.9322	2.0446	1.81741	30.6777	20.8431	22.2452	36.1655	29.6605	5.6607	27.9184	4.93196	2.30216	0.000468546	1.94341	up	--	--	--	--	--	--	HMDB0032290	699-17-2	Organic compounds	Organoheterocyclic compounds	Heteroaromatic compounds	--
pos_7074	Hydrocinnamic acid	200.105	39.8084	236.573	154	152.744	510.526	368.244	339.324	659.038	518.102	156.646	479.047	3.05815	1.61266	0.00243141	1.87079	up	--	--	--	--	--	--	HMDB0000764	501-52-0	Organic compounds	Phenylpropanoids and polyketides	Phenylpropanoic acids	--
pos_7076	alpha-Methylstyrene	15248.7	4438.62	15381.3	8497.53	11537.9	27117.6	23266.5	20983.9	31079.1	27653.7	11020.8	26020.2	2.361	1.2394	0.000635608	1.91546	up	C14395	--	--	--	--	--	HMDB0059899	--	Organic compounds	Benzenoids	Benzene and substituted derivatives	Phenylpropenes
pos_7077	L-Fucono-1,5-lactone	65.2477	22.8348	74.1467	44.1137	43.4055	111.222	93.7997	91.6739	116.393	105.349	49.9497	103.687	2.07584	1.05369	0.00182174	1.89955	up	C18028	Fructose and mannose metabolism(ko00051);;Metabolic pathways(ko01100)	--	--	--	--	--	--	--	--	--	--
pos_7078	(4-Methylphenyl)acetaldehyde	736.734	183.723	800.683	408.595	525.054	1242.9	1129.62	1032.85	1406.19	1266.83	530.958	1215.68	2.2896	1.19509	0.00151585	1.90364	up	--	--	--	--	--	--	HMDB0029639	104-09-6	Organic compounds	Benzenoids	Benzene and substituted derivatives	Phenylacetaldehydes
pos_7088	Citrinin	11.198	9.81723e-08	16.8932	2.32898	4.31134	32.678	32.3832	26.56	49.9183	52.5445	6.94631	38.8168	5.58812	2.48236	0.00145773	1.94854	up	C16765	--	--	--	--	--	HMDB0041857	518-75-2	Organic compounds	Organoheterocyclic compounds	Benzopyrans	--
pos_7095	Linamarin	700.082	193.867	725.998	506.939	565.866	842.774	908.611	833.555	1046.56	998.278	538.551	925.955	1.71935	0.78186	0.011558	1.71238	up	C01594	Metabolic pathways(ko01100)	--	--	--	--	HMDB0033699	554-35-8	Organic compounds	Organic oxygen compounds	Organooxygen compounds	Carbohydrates and carbohydrate conjugates
pos_7097	Richter	276.158	81.7379	285.244	226.876	262.65	341.19	363.228	329.585	408.536	371.03	226.533	362.714	1.60115	0.679111	0.0188163	1.63367	up	--	--	--	--	--	--	--	--	--	--	--	--
pos_7098	2'-O-methyladenosine	1596.3	407.656	1795.74	900.841	1282.36	2709.74	2533.52	2212.27	2996.44	2714.38	1196.58	2633.27	2.20066	1.13794	0.00215127	1.88205	up	--	--	--	--	--	--	HMDB0004326	2140-79-6	Organic compounds	Nucleosides, nucleotides, and analogues	Purine nucleosides	--
pos_7099	L-4-Hydroxyglutamate semialdehyde	2688.1	495.702	3093.41	1672.49	2136.63	5706.86	4867.5	4301.84	6536.39	5784.06	2017.26	5439.33	2.69639	1.43103	0.000461672	1.93672	up	C05938	Arginine and proline metabolism(ko00330);;Metabolic pathways(ko01100)	--	--	--	--	HMDB0006556	--	Organic compounds	Organic acids and derivatives	Carboxylic acids and derivatives	Amino acids, peptides, and analogues
pos_7100	alpha-1,5-L-Arabinobiose	147.43	51.3749	162.784	74.3003	102.042	333.472	251.807	239.282	376.499	325.169	107.586	305.246	2.83722	1.50448	0.00041975	1.95278	up	C20570	ABC transporters(ko02010)	--	--	--	--	--	--	--	--	--	--
pos_7104	Cicaprost	4713.4	772.148	5475.02	3230.14	3760.37	10891.8	8672.31	8040.88	12859.6	11046.1	3590.22	10302.1	2.86951	1.5208	0.000487481	1.9331	up	--	--	--	--	--	--	HMDB0250231	--	Organic compounds	Lipids and lipid-like molecules	Prenol lipids	Monoterpenoids
pos_7118	Clausarinol	815314	503758	743068	343133	584273	1.00781e+06	966873	885312	1.12925e+06	1.07534e+06	597909	1.01292e+06	1.6941	0.760519	0.00477774	1.82111	up	--	--	--	--	--	--	HMDB0041407	--	Organic compounds	Phenylpropanoids and polyketides	Coumarins and derivatives	Pyranocoumarins
pos_7121	O-(1->4)-alpha-L-Dihydrostreptosyl-streptidine 6-phosphate	310014	187381	305843	66920.6	189295	407949	404673	377675	468026	439174	211890	419499	1.97979	0.98535	0.00751675	1.82784	up	C04767	Metabolic pathways(ko01100)	--	--	--	--	--	--	--	--	--	--
pos_7126	Desisobutyrylciclesonide	4554.15	1975.94	4710.59	840.293	996.333	5648.07	6578.72	5669.98	7503.83	6509	2615.46	6381.92	2.44008	1.28693	0.00813785	1.8123	up	--	--	--	--	--	--	HMDB0251048	--	Organic compounds	Lipids and lipid-like molecules	Steroids and steroid derivatives	Hydroxysteroids
pos_7130	ophiocordin	183.002	34.1566	190.356	70.7671	101.065	185.212	230.293	198.185	225.387	218.541	115.869	211.524	1.82554	0.86832	0.0336276	1.56633	up	--	--	--	--	--	--	--	--	--	--	--	--
pos_7134	Casokefamide	323.562	9.81723e-08	461.383	230.329	264.987	1443.27	912.124	914.691	1877.13	1396.96	256.052	1308.83	5.11159	2.35377	0.00252588	1.91806	up	--	--	--	--	--	--	HMDB0249695	--	Organic compounds	Organic acids and derivatives	Carboxylic acids and derivatives	Amino acids, peptides, and analogues
pos_7136	Diacetazotol	8154.77	113.903	13024.3	6181.03	7379.53	41240	25391.7	25162.4	53263.1	40454.1	6970.7	37102.2	5.3226	2.41213	0.00295805	1.91377	up	--	--	--	--	--	--	HMDB0251119	--	Organic compounds	Organoheterocyclic compounds	Azobenzenes	--
pos_7161	Pristinamycin IA	68.5716	9.81723e-08	115.233	80.4509	89.1437	285.011	119.607	167.813	444.513	252.483	70.6797	253.885	3.59205	1.84481	0.0275556	1.59343	up	C11615	--	--	--	--	--	--	--	--	--	--	--
pos_7165	Tunicamycin VI	13.5197	1.96078	65.9912	0.0018304	0.0986712	90.5226	88.5052	65.46	104.47	66.3669	16.3144	83.0649	5.0915	2.34809	0.00324314	1.84954	up	--	--	--	--	--	--	--	--	--	--	--	--
pos_7168	Avizafone	95.3958	9.81723e-08	150.127	52.6692	38.225	601.181	369.855	363.187	713.765	526.973	67.2834	514.992	7.65408	2.93623	0.00144948	1.97412	up	C11725	--	--	--	--	--	HMDB0248745	--	Organic compounds	Organic acids and derivatives	Carboxylic acids and derivatives	Amino acids, peptides, and analogues
pos_7169	Precorrin 6Y	104.574	9.81723e-08	209.949	46.2298	43.4683	656.79	423.191	416.183	943.253	697.491	80.8442	627.381	7.76037	2.95613	0.00322339	1.92379	up	C06319	Porphyrin metabolism(ko00860);;Metabolic pathways(ko01100);;Biosynthesis of cofactors(ko01240)	--	--	--	--	--	--	--	--	--	--
pos_7173	Sialyllacto-N-tetraose a	41.6883	9.81723e-08	75.7756	9.76701	9.81723e-08	185.586	173.745	127.954	242.063	198.743	25.4462	185.618	7.29453	2.86682	0.000175745	2.01841	up	--	--	--	--	--	--	HMDB0006589	64003-53-8	Organic compounds	Organic oxygen compounds	Organooxygen compounds	Carbohydrates and carbohydrate conjugates
pos_7177	3-Dehydroshikimate	4.54996	0.51448	1.71518	0.67498	9.81723e-08	5.12406	5.25678	5.43016	6.87033	6.94548	1.49092	5.92536	3.9743	1.9907	0.00295495	1.88833	up	C02637	Phenylalanine, tyrosine and tryptophan biosynthesis(ko00400);;Metabolic pathways(ko01100);;Biosynthesis of amino acids(ko01230);;Biosynthesis of cofactors(ko01240)	--	--	--	--	HMDB0304122	--	Organic compounds	Organic oxygen compounds	Organooxygen compounds	Carbonyl compounds
pos_7179	9-Oxononanoic acid	170.915	206.76	164.773	177.758	171.862	128.099	105.611	136.351	170.466	130.965	178.413	134.299	0.752738	-0.40978	0.0102732	1.64699	down	C16322	alpha-Linolenic acid metabolism(ko00592)	--	--	--	--	HMDB0094711	--	Organic compounds	Lipids and lipid-like molecules	Fatty Acyls	Fatty acids and conjugates
pos_7180	Arg Ala Trp	5520.61	1226.22	6145.33	2764.97	4588.5	7814.55	8025.4	6984.16	7852.38	7563.06	4049.12	7647.91	1.88878	0.917455	0.0152943	1.71993	up	--	--	--	--	--	--	--	--	--	--	--	--
pos_7184	Sphingosine-1-phosphate	4908.54	6202.08	4415.5	4558.31	5096.34	3313.23	2353.94	3573.29	4603.84	3277.7	5036.16	3424.4	0.679963	-0.556472	0.0100919	1.64379	down	--	--	LMSP01050001	Sphingolipids [SP]	Sphingoid bases [SP01]	Sphingoid base 1-phosphates [SP0105]	HMDB0000277	26993-30-6	Organic compounds	Lipids and lipid-like molecules	Sphingolipids	Phosphosphingolipids
pos_7216	3-O-Acetylepisamarcandin	160591	69734.6	159463	7872.68	41198.4	185913	200430	172921	244704	220770	87772	204948	2.335	1.22342	0.0158839	1.70771	up	--	--	--	--	--	--	HMDB0031958	61490-18-4	Organic compounds	Phenylpropanoids and polyketides	Coumarins and derivatives	--
pos_7307	delta-Dodecalactone	66.7556	31.4012	56.8254	31.912	48.9336	36.177	6.29485	20.745	9.81723e-08	19.4353	47.1656	16.5304	0.350477	-1.51261	0.0114452	1.70047	down	--	--	LMFA07040040	Fatty Acyls [FA]	Fatty esters [FA07]	Lactones [FA0704]	HMDB0037742	3051-22-7	Organic compounds	Organoheterocyclic compounds	Lactones	Delta valerolactones
pos_7311	(2S)-2-Hydroxyhexadecanoylcarnitine	10129.5	8936.97	14998.6	9225.93	9875.36	8087.36	3274.21	6222.6	2347.31	5335.6	10633.3	5053.42	0.475245	-1.07326	0.0062505	1.72704	down	--	--	--	--	--	--	HMDB0241459	--	Organic compounds	Lipids and lipid-like molecules	Fatty Acyls	Fatty acid esters
pos_7354	Digitoxigenin 3-[glucosyl-(1->6)-glucosyl-(1->4)-2,6-dideoxyribohexoside]	53381.3	41552.9	49411	4589.48	19669	73084	73399.3	68451.3	79921.7	80368.4	33720.7	75044.9	2.22548	1.15412	0.00987248	1.84295	up	--	--	--	--	--	--	HMDB0034321	220710-06-5	Organic compounds	Lipids and lipid-like molecules	Steroids and steroid derivatives	Steroid lactones
pos_7375	Viloxazine	1474.36	1269.59	1041.58	1402.57	1276.74	1097.55	744.301	1101.03	610.028	952.83	1292.97	901.148	0.69696	-0.520852	0.0138254	1.66897	down	--	--	--	--	--	--	HMDB0259807	--	Organic compounds	Benzenoids	Phenol ethers	--
pos_7439	Octadecyl fumarate	96.7093	101.585	141.512	179.786	110.549	81.0889	60.7351	80.0882	68.053	81.6432	126.028	74.3217	0.589722	-0.761892	0.0267548	1.60824	down	--	--	LMFA07010979	Fatty Acyls [FA]	Fatty esters [FA07]	Wax monoesters [FA0701]	HMDB0038073	1741-93-1	Organic compounds	Lipids and lipid-like molecules	Fatty Acyls	Fatty acid esters
pos_7442	(9Z,12Z,15Z)-3-Hydroxyoctadecatrienoylcarnitine	433.599	488.5	639.445	548.405	524.433	331.556	343.898	403.834	70.388	291.647	526.876	288.265	0.54712	-0.87007	0.0101915	1.6944	down	--	--	LMFA07070027	Fatty Acyls [FA]	Fatty esters [FA07]	Fatty acyl carnitines [FA0707]	HMDB0240763	--	Organic compounds	Lipids and lipid-like molecules	Fatty Acyls	Fatty acid esters
pos_7488	L-Leucine	71.0266	68.1604	186.096	76.3791	104.901	251.808	111.2	195.607	277.632	206.327	101.313	208.515	2.05813	1.04134	0.0192267	1.58332	up	C00123	Valine, leucine and isoleucine degradation(ko00280);;Valine, leucine and isoleucine biosynthesis(ko00290);;Aminoacyl-tRNA biosynthesis(ko00970);;Metabolic pathways(ko01100);;2-Oxocarboxylic acid metabolism(ko01210);;Biosynthesis of amino acids(ko01230);;ABC transporters(ko02010);;mTOR signaling pathway(ko04150);;Protein digestion and absorption(ko04974);;Mineral absorption(ko04978);;Shigellosis(k…	--	--	--	--	--	--	--	--	--	--
pos_7497	N,N-dimethyl-Safingol	31844.3	49473.2	56234.7	23134.1	31456.9	71347.1	75953.6	72988.5	67833.5	47539.9	38428.6	67132.5	1.74694	0.804829	0.00755133	1.71678	up	--	--	LMSP01080056	Sphingolipids [SP]	Sphingoid bases [SP01]	Sphingoid base analogs [SP0108]	--	--	--	--	--	--
pos_7511	1-(3-Carboxypropylcarbamoyl)-5-fluorouracil	127.462	111.02	119.572	68.9566	100.412	156.167	160.708	137.197	173.608	166.979	105.484	158.932	1.50668	0.591375	0.00328897	1.84857	up	--	--	--	--	--	--	HMDB0243786	--	Organic compounds	Organic acids and derivatives	Carboxylic acids and derivatives	Amino acids, peptides, and analogues
pos_7513	trp-gly	290.185	266.014	318.532	249.315	298.896	245.038	195.874	235.642	111.161	212.025	284.588	199.948	0.702587	-0.509252	0.019678	1.64241	down	--	--	--	--	--	--	HMDB0029083	--	Organic compounds	Organic acids and derivatives	Carboxylic acids and derivatives	Amino acids, peptides, and analogues
pos_7517	3-Hydroxy-11Z-octadecenoylcarnitine	19.5096	10.7381	11.6821	9.81723e-08	9.81723e-08	30.63	34.0963	18.2605	28.8829	16.9225	8.38596	25.7584	3.07162	1.619	0.00927537	1.6392	up	--	--	--	--	--	--	HMDB0013339	--	Organic compounds	Lipids and lipid-like molecules	Fatty Acyls	Fatty acid esters
pos_7539	PC(18:3(6Z,9Z,12Z)/0:0)[U]	136965	118034	134238	117644	133960	123869	88917.7	113834	68101.1	106794	128168	100303	0.782591	-0.35367	0.044934	1.5102	down	--	--	--	--	--	--	--	--	--	--	--	--
pos_7557	Phenylpropanoate	30.5809	18.9958	24.064	20.992	22.4302	34.6005	30.5434	26.3204	35.9652	35.222	23.4126	32.5303	1.38944	0.4745	0.00948745	1.63754	up	C05629	Phenylalanine metabolism(ko00360);;Metabolic pathways(ko01100)	--	--	--	--	HMDB0000764	501-52-0	Organic compounds	Phenylpropanoids and polyketides	Phenylpropanoic acids	--
pos_7559	Guanidinoacetate	84.8136	53.047	63.1657	40.7767	54.9248	102.389	95.6407	71.7983	114.099	105.573	59.3456	97.9	1.64966	0.722168	0.00549304	1.71908	up	C00581	Glycine, serine and threonine metabolism(ko00260);;Arginine and proline metabolism(ko00330);;Metabolic pathways(ko01100)	--	--	--	--	HMDB0000128	352-97-6	Organic compounds	Organic acids and derivatives	Carboxylic acids and derivatives	Amino acids, peptides, and analogues
pos_7561	Levamisole	76.1673	55.6383	63.1116	40.892	56.6064	79.0519	82.4964	56.4499	90.6239	82.2894	58.4831	78.1823	1.33684	0.418821	0.0414522	1.39226	up	C07070	--	--	--	--	--	HMDB0014986	14769-73-4	Organic compounds	Organoheterocyclic compounds	Imidazothiazoles	--
pos_7582	Glu Gly Met Phe	132.641	77.0435	75.3282	63.5133	59.2829	154.436	160.301	101.981	205.705	155.893	81.5617	155.663	1.90853	0.932464	0.0085235	1.67499	up	--	--	--	--	--	--	--	--	--	--	--	--
pos_7605	phe-ile-gly	30.1619	14.9583	33.5992	4.3568	15.2713	56.6337	27.945	24.739	43.36	36.8029	19.6695	37.8961	1.92664	0.946091	0.0490314	1.34225	up	--	--	--	--	--	--	--	--	--	--	--	--
pos_7615	Pedein B	73.3823	25.4037	36.3488	9.81723e-08	9.81723e-08	153.906	92.5648	57.0491	194.599	134.451	27.027	126.514	4.68103	2.22683	0.0101082	1.70257	up	--	--	--	--	--	--	--	--	--	--	--	--
pos_7620	Linoelaidylcarnitine	109.414	157.423	202.096	66.8959	109.096	73.0357	47.3764	80.766	10.1134	49.9769	128.985	52.2537	0.405115	-1.3036	0.0262524	1.52169	down	--	--	--	--	--	--	HMDB0006461	85114-47-2	Organic compounds	Lipids and lipid-like molecules	Fatty Acyls	Fatty acid esters
pos_769	Deoxyinosine	295.674	223.579	299.218	262.277	305.205	219.198	245.899	179.596	230.398	220.287	277.19	219.076	0.790344	-0.339448	0.0170519	1.66701	down	C05512	Purine metabolism(ko00230);;Metabolic pathways(ko01100);;Nucleotide metabolism(ko01232);;ABC transporters(ko02010)	--	--	--	--	HMDB0000071	890-38-0	Organic compounds	Nucleosides, nucleotides, and analogues	Purine nucleosides	Purine 2'-deoxyribonucleosides
pos_7701	Cholyltyrosine	1852.87	898.22	2161.33	2383.57	2197.68	1654.04	231.949	1694.31	91.8481	806.066	1898.73	895.643	0.471705	-1.08404	0.0499762	1.436	down	--	--	--	--	--	--	HMDB0242377	--	Organic compounds	Lipids and lipid-like molecules	Steroids and steroid derivatives	Bile acids, alcohols and derivatives
pos_776	(1R)-Hydroxy-(2R)-N-acetyl-L-cysteinyl-1,2-dihydronaphthalene	4.49143	28.2827	21.6898	25.4675	24.2623	10.2664	4.22268	13.4491	4.98011	9.18851	20.8387	8.42136	0.40412	-1.30714	0.0391978	1.45711	down	C14796	Metabolism of xenobiotics by cytochrome P450(ko00980)	--	--	--	--	--	--	--	--	--	--
pos_781	Uric acid	4114.06	3509.28	2626.92	2259.44	3335.48	1321.26	2377.26	1972.29	2347.78	1854.18	3169.04	1974.55	0.623077	-0.682518	0.01827	1.63653	down	C00366	Purine metabolism(ko00230);;Metabolic pathways(ko01100);;Bile secretion(ko04976)	--	--	--	--	HMDB0000289	69-93-2	Organic compounds	Organoheterocyclic compounds	Imidazopyrimidines	Purines and purine derivatives
pos_7915	Diaminobutyric acid	10.4255	7.93115	4.06162	8.37706	2.71864	13.7824	16.9902	15.7332	17.2076	7.59844	6.7028	14.2624	2.12782	1.08938	0.0112755	1.61902	up	--	--	--	--	--	--	--	--	--	--	--	--
pos_799	5-Fluorouridine diphosphate	332.235	311.219	360.501	292.382	374.326	121.963	146.204	225.339	234.371	190.404	334.133	183.656	0.549651	-0.863412	0.00072425	1.93378	down	C21748	Drug metabolism - other enzymes(ko00983)	--	--	--	--	--	--	--	--	--	--
pos_8005	Lepidiumterpenyl ester	32369.3	40696.6	51221.3	44403.8	46428.2	33297.7	23334.3	29899.9	25635.3	27736	43023.9	27980.7	0.650353	-0.620706	0.00543688	1.79281	down	--	--	--	--	--	--	HMDB0036865	255833-57-9	Organic compounds	Lipids and lipid-like molecules	Prenol lipids	Sesquiterpenoids
pos_806	UDP-4-dehydro-6-deoxy-D-glucose	62.402	56.7916	44.2331	23.884	48.2617	9.81723e-08	18.7858	15.2975	22.0294	3.62727	47.1145	11.948	0.253595	-1.9794	0.00310118	1.84652	down	C04089	Amino sugar and nucleotide sugar metabolism(ko00520);;Metabolic pathways(ko01100);;Biosynthesis of nucleotide sugars(ko01250)	--	--	--	--	HMDB0012300	13094-28-5	Organic compounds	Nucleosides, nucleotides, and analogues	Pyrimidine nucleotides	Pyrimidine nucleotide sugars
pos_8118	Methyl jasmonate	16.2497	19.6518	32.2417	33.4846	23.8146	10.864	14.3592	17.9713	5.34811	11.2377	25.0885	11.9561	0.476556	-1.06928	0.0142912	1.62455	down	C11512	alpha-Linolenic acid metabolism(ko00592)	LMFA02020010	Fatty Acyls [FA]	Octadecanoids [FA02]	Jasmonic acids [FA0202]	HMDB0036583	1211-29-6	Organic compounds	Lipids and lipid-like molecules	Fatty Acyls	Lineolic acids and derivatives
pos_814	5,6-Dihydrouridine	26.3556	39.5204	31.3552	40.5544	33.8846	21.4671	25.4199	27.8975	23.7183	21.5094	34.334	24.0024	0.699085	-0.516459	0.013151	1.66563	down	--	--	--	--	--	--	HMDB0000497	5627-05-04	Organic compounds	Organic oxygen compounds	Organooxygen compounds	Carbohydrates and carbohydrate conjugates
pos_8220	Taxa-4(20),11(12)-dien-5alpha-ol	83.5176	108.763	120.666	109.625	109.161	79.4742	94.2562	86.2212	24.7961	68.6924	106.346	70.688	0.664695	-0.589235	0.0408246	1.46527	down	C11895	Metabolic pathways(ko01100)	LMPR0104390003	Prenol Lipids [PR]	Isoprenoids [PR01]	C20 isoprenoids (diterpenes) [PR0104]	--	--	--	--	--	--
pos_8229	G-418	11.1375	29.6589	37.0939	19.9583	24.0887	7.77896	22.9511	7.56031	9.81723e-08	11.8243	24.3875	10.0229	0.410986	-1.28284	0.0382846	1.38195	down	--	--	--	--	--	--	--	--	--	--	--	--
pos_8341	MG(0:0/20:1(11Z)/0:0)	15747.2	22097.2	37374.5	36316.4	33563.5	13259.4	12770.8	13413.4	8550.5	11037.4	29019.7	11806.3	0.406837	-1.29748	0.0145051	1.75991	down	--	--	--	--	--	--	HMDB0011543	--	Organic compounds	Lipids and lipid-like molecules	Endocannabinoids	--
pos_8577	Trihexosylceramide (d18_1_16_0)	3462.38	3426.86	3673.81	4399.34	4130.58	3027.48	2982.5	3627.61	2418.4	2968.99	3818.59	3004.99	0.786938	-0.345679	0.0170449	1.60226	down	--	--	--	--	--	--	--	--	--	--	--	--
pos_8621	Docosanoic acid	1558.64	2034.07	2549.84	2219.36	2048.84	6286.32	9071.59	5004.32	5995.08	2347.14	2082.15	5740.89	2.75719	1.4632	0.0270787	1.60796	up	C08281	Biosynthesis of unsaturated fatty acids(ko01040)	LMFA01010022	Fatty Acyls [FA]	Fatty Acids and Conjugates [FA01]	Straight chain fatty acids [FA0101]	HMDB0000944	112-85-6	Organic compounds	Lipids and lipid-like molecules	Fatty Acyls	Fatty acids and conjugates
pos_863	5-Hydroxyectoine	1132.92	1298.1	991.797	942.86	1164.05	1520.03	1507.98	1496.41	1651.46	1687.65	1105.95	1572.71	1.42205	0.507968	0.000506187	2.00444	up	C16432	Glycine, serine and threonine metabolism(ko00260);;Metabolic pathways(ko01100)	--	--	--	--	--	--	--	--	--	--
pos_866	L-Tyrosine	1225.17	1926.96	1360.87	1302.92	1555.34	2153.29	2311.3	2336.48	1972.02	2435.93	1474.25	2241.8	1.52064	0.604678	0.00144871	1.95452	up	C00082	Ubiquinone and other terpenoid-quinone biosynthesis(ko00130);;Monobactam biosynthesis(ko00261);;Tyrosine metabolism(ko00350);;Phenylalanine metabolism(ko00360);;Phenylalanine, tyrosine and tryptophan biosynthesis(ko00400);;Thiamine metabolism(ko00730);;Aminoacyl-tRNA biosynthesis(ko00970);;Metabolic pathways(ko01100);;2-Oxocarboxylic acid metabolism(ko01210);;Biosynthesis of amino acids(ko01230);…	--	--	--	--	HMDB0000158	60-18-4	Organic compounds	Organic acids and derivatives	Carboxylic acids and derivatives	Amino acids, peptides, and analogues
pos_867	7-Cyano-7-carbaguanine	6.89925	22.6657	13.7989	22.7894	19.0013	12.4678	6.82063	6.51593	3.10646	9.14896	17.0309	7.61196	0.44695	-1.16182	0.0322267	1.50197	down	C15996	Folate biosynthesis(ko00790);;Metabolic pathways(ko01100)	--	--	--	--	--	--	--	--	--	--
pos_8804	1-Palmitoyl Lysophosphatidic Acid	236.467	237.809	185.413	246.148	201.383	300.901	495.48	323.964	389.503	331.977	221.444	368.365	1.66347	0.734195	0.0109433	1.77117	up	--	--	--	--	--	--	--	--	--	--	--	--
pos_897	PHENACYLAMINE	2159.38	3033.72	2297.93	2194.5	2586.16	3141.67	3810.96	3927.55	3244.45	3990.55	2454.34	3623.04	1.47618	0.561864	0.00133258	1.93766	up	--	--	--	--	--	--	HMDB0032628	613-89-8	Organic compounds	Organic oxygen compounds	Organooxygen compounds	Carbonyl compounds
pos_898	Ectoine	1522.45	2332.22	1668.85	1569.39	1888.67	2490.75	2815.55	2848.03	2366.41	2986.95	1796.32	2701.54	1.50393	0.588738	0.00157051	1.93146	up	C06231	Glycine, serine and threonine metabolism(ko00260);;Metabolic pathways(ko01100)	--	--	--	--	HMDB0240650	96702-03-3	Organic compounds	Organic acids and derivatives	Carboxylic acids and derivatives	Amino acids, peptides, and analogues
pos_910	(R)-3-hydroxybutyrylcarnitine	7360.08	6450.16	8186.92	10505.7	9240.06	2858.37	3823.89	8296.87	4036.97	5294.47	8348.59	4862.12	0.582388	-0.779949	0.0198175	1.55392	down	--	--	--	--	--	--	HMDB0062735	--	Organic compounds	Lipids and lipid-like molecules	Fatty Acyls	Fatty acid esters
pos_9308	N-Nervonoyl Tyrosine	11630.2	14979.6	19948.2	16094.2	15540.7	18598.2	18108.3	20202.8	23687.9	20101.9	15638.6	20139.8	1.28783	0.364942	0.0280158	1.57441	up	--	--	--	--	--	--	HMDB0242102	--	--	--	--	--
pos_931	(E)-Casimiroedine	222.007	321.444	230.311	293.453	264.053	260.538	91.1602	87.5653	128.643	139.669	266.253	141.515	0.531505	-0.911844	0.0126303	1.69505	down	--	--	--	--	--	--	HMDB0030274	5853-02-01	Organic compounds	Organic oxygen compounds	Organooxygen compounds	Carbohydrates and carbohydrate conjugates
pos_940	Sarecycline	45.596	89.5963	69.7058	89.8454	74.245	73.5721	27.8383	25.4306	40.7052	30.5475	73.7977	39.6187	0.536856	-0.897393	0.0219704	1.55623	down	--	--	--	--	--	--	HMDB0304894	--	Organic compounds	Phenylpropanoids and polyketides	Tetracyclines	--
pos_9544	PC(P-18:1(11Z)/20:3(6,8,11)-OH(5))	198714	227182	183906	103747	194910	303916	296316	283950	213131	213587	181691	262180	1.44299	0.529066	0.0239338	1.48467	up	--	--	--	--	--	--	HMDB0289731	--	--	--	--	--
pos_958	Lanthionine ketimine	792.995	839.848	955.522	1139.43	1022.11	675.83	610.66	772.222	248.853	798.476	949.981	621.208	0.653916	-0.612822	0.0271842	1.51785	down	--	--	--	--	--	--	HMDB0004823	83923-11-9	Organic compounds	Organic acids and derivatives	Carboxylic acids and derivatives	Amino acids, peptides, and analogues
pos_960	Formyl-5-hydroxykynurenamine	270.229	237.027	396.57	459.101	372.093	176.181	154.254	203.007	39.9722	239.748	347.004	162.632	0.468676	-1.09334	0.00894529	1.67494	down	C05647	Tryptophan metabolism(ko00380)	--	--	--	--	HMDB0012948	958733-17-0	Organic compounds	Organic oxygen compounds	Organooxygen compounds	Carbonyl compounds
pos_9638	trans-Dec-2-enoic acid	1639.44	1754.66	1655.83	1044.82	1494.78	1806.99	1836.58	1963.3	1816.91	1967.66	1517.91	1878.29	1.23742	0.307337	0.0428669	1.5649	up	--	--	--	--	--	--	HMDB0010726	--	Organic compounds	Lipids and lipid-like molecules	Fatty Acyls	Fatty acids and conjugates
pos_969	1-(5'-Phosphoribosyl)-5-formamido-4-imidazolecarboxamide	6.99803	9.31639	19.6821	15.1227	14.0703	5.54136	1.36721	9.33611	9.81723e-08	10.8727	13.0379	5.42348	0.415978	-1.26542	0.0390498	1.37273	down	C04734	Purine metabolism(ko00230);;Metabolic pathways(ko01100)	--	--	--	--	HMDB0001439	13018-54-7	Organic compounds	Nucleosides, nucleotides, and analogues	Imidazole ribonucleosides and ribonucleotides	1-ribosyl-imidazolecarboxamides
pos_9710	C16 Sphingosine	53.2541	51.3916	58.5739	17.8177	40.8955	48.3009	79.2815	58.9997	71.1417	83.8031	44.3866	68.3054	1.53888	0.621876	0.0400819	1.49088	up	--	--	LMSP01040008	Sphingolipids [SP]	Sphingoid bases [SP01]	Sphingoid base homologs and variants [SP0104]	HMDB0242181	--	Organic compounds	Organic nitrogen compounds	Organonitrogen compounds	Amines
pos_986	2-Phenylacetamide	170.931	238.296	250.58	258.698	242.209	267.703	299.415	497.247	314.973	423.821	232.143	360.632	1.55349	0.635514	0.0375366	1.61324	up	C02505	Phenylalanine metabolism(ko00360);;Metabolic pathways(ko01100)	--	--	--	--	HMDB0010715	103-81-1	Organic compounds	Benzenoids	Benzene and substituted derivatives	Phenylacetamides
pos_9927	O-(13-Carboxytridecanoyl)carnitine	1090.29	1078.04	980.15	1420.5	1229.52	1552.79	2136.8	1657.2	1168.6	1551.49	1159.7	1613.37	1.3912	0.476326	0.0404421	1.45574	up	--	--	LMFA07070084	Fatty Acyls [FA]	Fatty esters [FA07]	Fatty acyl carnitines [FA0707]	HMDB0240776	--	Organic compounds	Lipids and lipid-like molecules	Fatty Acyls	Fatty acid esters
pos_9994	Cer(d17:1/PGE2)	234.208	199.066	199.346	112.661	167.515	209.346	299.557	230.147	238.437	247.613	182.559	245.02	1.34214	0.424536	0.0416187	1.44051	up	--	--	--	--	--	--	HMDB0289901	--	--	--	--	--

## Sheet: Model_vs_WP.diff.annotation
Supplementary Table 3: Model_vs_WP.diff.annotation
#ID	name	B1	B2	B3	B4	B5	E1	E2	E3	E4	E5	B_Mean	E_Mean	Fold_change	log2FC	Pvalue	VIP	regulated	KEGG_annotation	KEGG_pathway_annotation	LM_ID(lipidmaps)	CATEGORY(lipidmaps)	MAIN_CLASS(lipidmaps)	SUB_CLASS	HMDB_ID	CAS	kingdom(HMDB)	super_class(HMDB)	HMDB_taxonomy	sub_class(HMDB)
neg_1267	2-(7'-Methylthio)heptylmalic acid	9.81723e-08	9.81723e-08	9.81723e-08	9.81723e-08	9.81723e-08	620.026	9.81723e-08	155.353	476.758	372.629	9.81723e-08	324.953	3.31003e+09	31.6242	0.043003	1.5137	up	C17230	2-Oxocarboxylic acid metabolism(ko01210)	--	--	--	--	HMDB0304054	--	Organic compounds	Organic acids and derivatives	Hydroxy acids and derivatives	Medium-chain hydroxy acids and derivatives
neg_1313	2-Octynoic acid	35.2019	83.273	62.9202	171.678	66.1922	32.6607	12.8758	2.14598	21.4576	9.89978	83.8531	15.808	0.18852	-2.40721	0.0413516	1.53646	down	--	--	LMFA01030577	Fatty Acyls [FA]	Fatty Acids and Conjugates [FA01]	Unsaturated fatty acids [FA0103]	HMDB0245278	--	Organic compounds	Lipids and lipid-like molecules	Fatty Acyls	Fatty acids and conjugates
neg_1358	C05964	13.0079	9.81723e-08	17.2896	27.5805	17.8837	9.81723e-08	9.81723e-08	1.30865	6.4744	3.60925	15.1523	2.27846	0.15037	-2.73341	0.0429201	1.52372	down	--	--	--	--	--	--	--	--	--	--	--	--
neg_1364	Brevianamide F	146.159	150.8	222.787	117.461	155.837	247.209	194.798	181.264	276.15	228.107	158.609	225.506	1.42177	0.507691	0.0257081	1.40048	up	C20563	Metabolic pathways(ko01100)	--	--	--	--	--	--	--	--	--	--
neg_1410	C75	71.0478	217.306	331.481	457.752	251.637	79.9645	27.8337	34.6576	64.2192	57.5235	265.845	52.8397	0.198761	-2.33089	0.0281152	1.68028	down	--	--	--	--	--	--	--	--	--	--	--	--
neg_1449	C20760	251.803	333.557	621.424	636.254	448.892	187.292	164.594	174.046	264.924	213.522	458.386	200.875	0.438223	-1.19026	0.0260416	1.69388	down	--	--	--	--	--	--	--	--	--	--	--	--
neg_1460	Acoric acid	552.769	2382.3	1697.5	2432.2	1588.49	591.153	141.886	244.073	427.624	400.361	1730.65	361.019	0.208603	-2.26117	0.0143131	1.77146	down	--	--	--	--	--	--	HMDB0038165	5956-06-09	Organic compounds	Lipids and lipid-like molecules	Prenol lipids	Monoterpenoids
neg_1462	(Z)-5-[(2R,3S,4S)-4-Hydroxy-2-[(E)-3-hydroxyoct-1-enyl]oxan-3-yl]pent-3-enoic acid	589.536	6459.91	5521.75	3318.58	3486.72	945.292	350.035	432.847	639.034	638.338	3875.3	601.109	0.155113	-2.68861	0.0317815	1.67105	down	--	--	--	--	--	--	HMDB0244345	--	Organic compounds	Organic acids and derivatives	Hydroxy acids and derivatives	Medium-chain hydroxy acids and derivatives
neg_1463	10-Deacetyl-2-debenzoylbaccatin III	56.1403	669.011	528.045	384.085	335.925	90.0154	36.9211	46.7865	62.4387	56.0955	394.641	58.4514	0.148113	-2.75523	0.0304295	1.67533	down	C11899	Metabolic pathways(ko01100)	--	--	--	--	--	--	--	--	--	--
neg_1464	Decitabine	21.8348	223.215	154.583	78.1606	98.8881	33.6819	8.9359	9.63328	12.9798	18.1823	115.336	16.6826	0.144643	-2.78943	0.0446212	1.57312	down	--	--	--	--	--	--	HMDB0015391	2353-33-5	Organic compounds	Organoheterocyclic compounds	Triazines	Triazinones
neg_1486	Dhesn	20.3989	38.9898	97.4253	58.648	46.6747	2.48826	9.81723e-08	9.81723e-08	9.81723e-08	9.81723e-08	52.4273	0.497653	0.00949224	-6.71904	0.0155384	1.83103	down	--	--	--	--	--	--	--	--	--	--	--	--
neg_1495	milbemycin alpha10	51.0755	77.9558	189.13	124.251	121.072	23.4611	26.4333	24.0481	31.8386	26.772	112.697	26.5106	0.235238	-2.0878	0.0212963	1.78057	down	--	--	--	--	--	--	HMDB0254722	--	Organic compounds	Phenylpropanoids and polyketides	Macrolides and analogues	Milbemycins
neg_1497	Cyanoketone	692.008	720.494	646.756	731.008	665.83	515.879	549.586	501.209	622.086	581.03	691.219	553.958	0.801421	-0.319367	0.00128466	1.86139	down	--	--	--	--	--	--	HMDB0250613	--	Organic compounds	Lipids and lipid-like molecules	Steroids and steroid derivatives	Androstane steroids
neg_1506	Tetradecanedioic acid	282.607	171.353	249.678	292.986	250.515	204.972	124.522	157.048	212.316	176.153	249.428	175.002	0.701615	-0.511248	0.0254197	1.50948	down	--	--	LMFA01170018	Fatty Acyls [FA]	Fatty Acids and Conjugates [FA01]	Dicarboxylic acids [FA0117]	HMDB0000872	821-38-5	Organic compounds	Lipids and lipid-like molecules	Fatty Acyls	Fatty acids and conjugates
neg_1508	Hymenoxon	549.346	312.641	436.197	444.588	431.1	289.536	93.7282	229.079	309.962	242.773	434.774	233.015	0.535946	-0.899841	0.00533885	1.70441	down	C09482	--	--	--	--	--	HMDB0253305	--	Organic compounds	Organoheterocyclic compounds	Oxanes	--
neg_1525	3-Oxotetradecanoic acid	36.7737	31.7751	59.9619	88.1322	55.3361	37.3155	12.6406	26.3844	29.0613	24.5488	54.3958	25.9901	0.477797	-1.06553	0.0437015	1.50003	down	--	--	--	--	--	--	HMDB0010730	--	Organic compounds	Lipids and lipid-like molecules	Fatty Acyls	Fatty acids and conjugates
neg_1548	(-)-alpha-Bisabolol	38.5914	20.2669	38.2665	49.5064	39.6529	18.2704	10.8453	17.8047	23.4927	20.0227	37.2568	18.0872	0.485472	-1.04254	0.0117053	1.71226	down	C09621	Metabolic pathways(ko01100)	LMPR0103060001	Prenol Lipids [PR]	Isoprenoids [PR01]	C15 isoprenoids (sesquiterpenes) [PR0103]	HMDB0036197	23089-26-1	Organic compounds	Lipids and lipid-like molecules	Prenol lipids	Sesquiterpenoids
neg_1568	1-Nonen-3-ol	64.9632	38.6234	60.1024	38.7444	51.6637	59.5382	58.4541	125.861	109.282	98.7191	50.8194	90.371	1.77828	0.830478	0.0399157	1.5227	up	--	--	LMFA05000504	Fatty Acyls [FA]	Fatty alcohols [FA05]	-	HMDB0034152	21964-44-3	Organic compounds	Lipids and lipid-like molecules	Fatty Acyls	Fatty alcohols
neg_1578	24,24-Difluoro-1alpha,25-dihydroxyvitamin D3	55.7459	23.3876	68.7536	44.9974	46.3229	56.522	64.3694	75.4624	83.0955	75.7475	47.8415	71.0394	1.48489	0.570357	0.0347879	1.43863	up	--	--	LMST03020145	Sterol Lipids [ST]	Secosteroids [ST03]	Vitamin D3 and derivatives [ST0302]	HMDB0242645	--	Organic compounds	Lipids and lipid-like molecules	Steroids and steroid derivatives	Vitamin D and derivatives
neg_1581	Pregnenolone-3,21-disulfate	460.309	81.0636	537.311	146.839	260.259	450.144	425.986	1568.25	1527.36	1177.67	297.156	1029.88	3.46579	1.79318	0.0403469	1.51745	up	--	--	--	--	--	--	HMDB0242133	--	Organic compounds	Lipids and lipid-like molecules	Steroids and steroid derivatives	Sulfated steroids
neg_1612	3-[(3aS,4S,7aS)-7a-Methyl-1,5-dioxo-octahydro-1H-inden-4-yl]propanoate	56.5081	46.1155	52.8502	45.2229	47.9643	58.9313	50.4046	83.2011	77.0754	66.3562	49.7322	67.1937	1.35111	0.434146	0.0392953	1.53392	up	C20199	Metabolic pathways(ko01100)	--	--	--	--	--	--	--	--	--	--
neg_1613	5-((6-((Aminomethyl)amino)-1-oxohexyl)amino)pentanoic acid	2100.71	1181.23	2097.84	2097.47	1864.82	1161.1	349.331	820	1103.17	853.068	1868.42	857.334	0.458856	-1.12389	0.00245267	1.82086	down	--	--	--	--	--	--	HMDB0258266	--	Organic compounds	Lipids and lipid-like molecules	Fatty Acyls	Fatty amides
neg_1616	2,3-Dimethoxy-5-methyl-6-(9'-carboxynonyl)-1,4-benzoquinone	96.3225	55.9164	92.1538	151.552	97.9275	52.5864	17.1299	37.5174	63.4263	38.2222	98.7745	41.7764	0.422947	-1.24145	0.016171	1.63885	down	--	--	--	--	--	--	--	--	--	--	--	--
neg_1618	Propofol glucuronide	107.589	61.0363	106.324	96.2032	91.7417	67.8419	19.9221	43.9101	59.3286	53.4039	92.5789	48.8813	0.527997	-0.9214	0.00596818	1.71963	down	--	--	--	--	--	--	HMDB0060933	--	Organic compounds	Organic oxygen compounds	Organooxygen compounds	Carbohydrates and carbohydrate conjugates
neg_1629	geranate	26.82	26.975	44.4647	35.1486	29.0688	4.59945	4.04359	21.5473	33.5724	18.2773	32.4954	16.408	0.504934	-0.985834	0.0443735	1.4504	down	C16461	--	--	--	--	--	HMDB0304369	--	Organic compounds	Lipids and lipid-like molecules	Prenol lipids	Monoterpenoids
neg_1637	PS(14:0/18:0)	74.7837	35.7906	101.216	77.0296	94.4309	35.1432	9.81723e-08	14.0535	33.0994	5.8631	76.6502	17.6318	0.23003	-2.12011	0.00351175	1.85721	down	--	--	LMGP03010928	Glycerophospholipids [GP]	Glycerophosphoserines [GP03]	Diacylglycerophosphoserines [GP0301]	HMDB0012334	--	Organic compounds	Lipids and lipid-like molecules	Glycerophospholipids	Glycerophosphoserines
neg_1638	Microcystin LR	42.3242	55.1624	75.6926	16.8352	56.9728	62.97	81.678	81.1287	81.1122	76.0415	49.3974	76.5861	1.55041	0.632646	0.0463488	1.40132	up	C05371	Bile secretion(ko04976)	--	--	--	--	--	--	--	--	--	--
neg_1645	PC(2:0/PGE2)	2421.66	1762.58	1694.75	1293.4	1614.4	2317.23	2329.31	2149.91	2312.12	2229.44	1757.36	2267.6	1.29035	0.367758	0.0493782	1.52956	up	--	--	--	--	--	--	HMDB0288826	--	--	--	--	--
neg_1649	PE(14:1(9Z)/22:5(4Z,7Z,10Z,13Z,16Z))	101.215	35.3654	98.6532	64.1992	75.6414	46.6107	5.01207	31.8179	47.2328	30.7343	75.0149	32.2816	0.430335	-1.21647	0.0213369	1.57454	down	--	--	--	--	--	--	HMDB0008878	--	Organic compounds	Lipids and lipid-like molecules	Glycerophospholipids	Glycerophosphoethanolamines
neg_1650	LysoPE(0:0/18:3(6Z,9Z,12Z))	745.125	777.794	970.694	860.885	799.371	707.951	627.361	521.589	539.228	547.944	830.774	588.814	0.708754	-0.496643	0.00189439	1.89053	down	--	--	--	--	--	--	HMDB0011478	--	Organic compounds	Lipids and lipid-like molecules	Glycerophospholipids	Glycerophosphoethanolamines
neg_1654	2,3-Dinor-8-iso prostaglandin F2alpha	9.76912	13.4821	27.6759	11.9504	16.8603	21.8035	21.2762	27.802	31.486	28.4426	15.9476	26.1621	1.64051	0.714141	0.0299233	1.41942	up	C14794	Arachidonic acid metabolism(ko00590)	--	--	--	--	--	--	--	--	--	--
neg_1655	Rhizoxin	73.4607	90.2095	122.254	75.4493	86.3168	103.058	124.161	142.042	133.696	124.289	89.538	125.449	1.40108	0.486535	0.012372	1.58001	up	--	--	--	--	--	--	HMDB0257197	--	Organic compounds	Lipids and lipid-like molecules	Prenol lipids	Terpene lactones
neg_1665	N-Palmitoyl Arginine	5922	4360.22	3814.23	3868.12	4019.51	6257.6	5090.59	8771.31	8128.71	6659.51	4396.82	6981.54	1.58786	0.667086	0.0133858	1.69948	up	--	--	--	--	--	--	HMDB0241920	--	Organic compounds	Lipids and lipid-like molecules	Steroids and steroid derivatives	Androstane steroids
neg_1680	Methyl octynecarboxylate	61.2749	48.7122	94.3524	82.0858	63.4988	27.039	17.6479	33.1557	52.8699	34.2837	69.9848	32.9992	0.47152	-1.08461	0.00703716	1.75538	down	--	--	LMFA07010964	Fatty Acyls [FA]	Fatty esters [FA07]	Short fatty esters [FA0710]	HMDB0031273	111-80-8	Organic compounds	Lipids and lipid-like molecules	Fatty Acyls	Fatty acid esters
neg_1685	(S)-10,16-Dihydroxyhexadecanoic acid	137.294	76.2849	162.776	176.462	139.018	90.9868	74.7877	82.5973	101.182	82.7445	138.367	86.4597	0.624858	-0.678399	0.0369098	1.57722	down	--	--	--	--	--	--	HMDB0037798	69232-67-3	Organic compounds	Lipids and lipid-like molecules	Fatty Acyls	Fatty acids and conjugates
neg_1774	PE(15:0/20:3(8Z,11Z,14Z)-2OH(5,6))	67.6044	30.2682	64.4913	69.1528	65.1193	26.7833	3.61126	18.0274	39.4169	32.4769	59.3272	24.0631	0.4056	-1.30187	0.00652936	1.71166	down	--	--	--	--	--	--	HMDB0260820	--	--	--	--	--
neg_1810	Decanoylcholine	65.2245	45.0073	54.663	43.0196	64.4663	24.8329	33.5677	38.2722	44.6164	33.9469	54.4762	35.0472	0.64335	-0.636325	0.0108601	1.64608	down	--	--	LMFA07010826	Fatty Acyls [FA]	Fatty esters [FA07]	Wax monoesters [FA0701]	HMDB0013228	--	Organic compounds	Organic nitrogen compounds	Organonitrogen compounds	Quaternary ammonium salts
neg_1814	25-Hydroxyvitamin D3 3-sulfate ester	1313.6	1403.4	1314.2	1357.91	1386.51	1106.93	958.86	1149.2	1284.29	1189.24	1355.12	1137.7	0.839557	-0.252299	0.0123972	1.72689	down	--	--	--	--	--	--	--	--	--	--	--	--
neg_1817	5(S)-HPETE	219.321	173.813	270.971	276.126	236.718	112.103	75.2993	165.835	226.028	135.308	235.39	142.915	0.607141	-0.719896	0.0210613	1.57149	down	C05356	Arachidonic acid metabolism(ko00590);;Metabolic pathways(ko01100);;Serotonergic synapse(ko04726);;Ovarian steroidogenesis(ko04913)	--	--	--	--	HMDB0011135	74581-83-2	Organic compounds	Lipids and lipid-like molecules	Fatty Acyls	Eicosanoids
neg_1818	C11134	148.887	258.17	333.945	241.358	367.423	382.607	738.469	342.629	444.456	569.855	269.957	495.603	1.83586	0.876457	0.0317967	1.44893	up	--	--	--	--	--	--	--	--	--	--	--	--
neg_1821	Leukotriene C4	335.38	315.013	267.981	239.056	301.948	369.678	491.38	412.774	370.673	375.452	291.876	403.991	1.38412	0.468971	0.0054974	1.75987	up	C02166	Arachidonic acid metabolism(ko00590);;Metabolic pathways(ko01100);;Neuroactive ligand-receptor interaction(ko04080);;Fc epsilon RI signaling pathway(ko04664);;Serotonergic synapse(ko04726);;Bile secretion(ko04976);;Asthma(ko05310)	LMFA03020003	Fatty Acyls [FA]	Eicosanoids [FA03]	Leukotrienes [FA0302]	HMDB0001198	72025-60-6	Organic compounds	Organic acids and derivatives	Carboxylic acids and derivatives	Amino acids, peptides, and analogues
neg_1852	LysoPE(0:0/18:2(9Z,12Z))	61064.5	75762.4	71660.4	73282.8	68380	64726.2	67401.3	52493.9	49274.2	59480.3	70030	58675.2	0.837858	-0.255223	0.0319045	1.50386	down	--	--	--	--	--	--	HMDB0011477	--	Organic compounds	Lipids and lipid-like molecules	Glycerophospholipids	Glycerophosphoethanolamines
neg_1857	Pubescenol	40.8063	45.9109	36.0811	24.3933	39.3813	55.7977	38.8896	61.5736	52.4196	42.4236	37.3146	50.2208	1.34588	0.428546	0.0487955	1.38184	up	--	--	LMPR0104300001	Prenol Lipids [PR]	Isoprenoids [PR01]	C20 isoprenoids (diterpenes) [PR0104]	HMDB0030085	90685-93-1	Organic compounds	Lipids and lipid-like molecules	Steroids and steroid derivatives	Steroid lactones
neg_1860	Ouabain	13.9991	16.5741	22.1401	9.05226	8.31247	39.3331	36.3131	28.7848	27.8392	18.7727	14.0156	30.2086	2.15535	1.10792	0.00753987	1.65106	up	C01443	Bile secretion(ko04976)	LMST01120022	Sterol Lipids [ST]	Sterols [ST01]	Cardanolides and derivatives [ST0112]	HMDB0015224	630-60-4	Organic compounds	Benzenoids	Naphthalenes	--
neg_1864	Penitrem D	250400	213832	221417	186293	214957	260461	250714	225851	241770	258219	217380	247403	1.13811	0.186646	0.042737	1.43354	up	C20596	--	--	--	--	--	HMDB0256240	--	Organic compounds	Organoheterocyclic compounds	Naphthopyrans	--
neg_1874	(E)-3,7-Dimethyl-1,5,7-octatrien-3-ol	1881.83	2002.15	2000.87	1492.86	1850.4	2190.79	2270.89	2104.4	2101.75	2126.87	1845.62	2158.94	1.16976	0.226216	0.0251795	1.56841	up	--	--	--	--	--	--	HMDB0032242	29171-20-8	Organic compounds	Organic oxygen compounds	Organooxygen compounds	Carbonyl compounds
neg_1881	PE(P-18:0/PGE2)	73.1439	152.593	145.958	106.161	114.752	107.923	98.3671	49.641	42.0661	18.5268	118.521	63.3049	0.534121	-0.90476	0.039619	1.4896	down	--	--	--	--	--	--	HMDB0285298	--	--	--	--	--
neg_1884	PE(16:0/20:3(8Z,11Z,14Z)-2OH(5,6))	21.0752	164.682	147.389	136.449	120.023	36.7413	11.6822	22.891	27.4839	14.0517	117.924	22.57	0.191395	-2.38537	0.0184323	1.76746	down	--	--	--	--	--	--	HMDB0260924	--	--	--	--	--
neg_1885	PS(18:0/18:2(9Z,12Z))	389.923	214.209	568.667	315.076	396.19	247.305	74.8079	160.607	204.309	161.996	376.813	169.805	0.450635	-1.14997	0.0194855	1.66652	down	--	--	LMGP03010031	Glycerophospholipids [GP]	Glycerophosphoserines [GP03]	Diacylglycerophosphoserines [GP0301]	HMDB0012380	132014-81-4	Organic compounds	Lipids and lipid-like molecules	Glycerophospholipids	Glycerophosphoserines
neg_1891	2-[(L-Alanin-3-ylcarbamoyl)methyl]-3-(2-aminoethylcarbamoyl)-2-hydroxypropanoate	56.5836	37.1546	86.6848	46.5131	54.8551	35.0854	8.19571	14.718	24.8716	24.4231	56.3582	21.4588	0.380756	-1.39306	0.00980348	1.75776	down	C22074	Metabolic pathways(ko01100)	--	--	--	--	--	--	--	--	--	--
neg_1922	11,12,13-Trinor-1(10)-spirovetivene-2,7-dione	54.6868	46.0225	40.6825	28.5442	37.4226	8.71837	10.8474	23.7237	28.9941	21.8429	41.4717	18.8253	0.453931	-1.13945	0.00479945	1.69317	down	--	--	--	--	--	--	HMDB0036734	84413-75-2	Organic compounds	Organic oxygen compounds	Organooxygen compounds	Carbonyl compounds
neg_1923	PC(P-16:0/PGF2alpha)	2823.98	2257	2871.06	2875.21	2726.65	645.771	434.379	781.803	1291.52	758.166	2710.78	782.328	0.288599	-1.79286	7.53497e-06	2.07967	down	--	--	--	--	--	--	HMDB0289455	--	--	--	--	--
neg_1927	(6Z,9Z,12Z)-Octadecatrienoic acid	110.326	84.4097	103.702	88.1601	97.5702	33.0689	28.1962	48.1276	61.4749	47.8596	96.8336	43.7454	0.451758	-1.14638	0.000145246	1.98229	down	C06426	Linoleic acid metabolism(ko00591);;Biosynthesis of unsaturated fatty acids(ko01040);;Metabolic pathways(ko01100)	--	--	--	--	HMDB0003073	506-26-3	Organic compounds	Lipids and lipid-like molecules	Fatty Acyls	Lineolic acids and derivatives
neg_1930	1-(3-Methylbutanoyl)-6-apiosylglucose	101.986	75.6923	102.696	63.7561	88.498	10.593	8.85372	21.4899	39.6644	17.9282	86.5257	19.7058	0.227745	-2.13451	0.000150067	2.0061	down	--	--	--	--	--	--	HMDB0039953	467242-31-5	Organic compounds	Lipids and lipid-like molecules	Fatty Acyls	Fatty acyl glycosides
neg_1931	14-Fluoro-6-thiaheptadecanoic acid	140.543	90.8982	168.08	73.2261	123.582	17.1681	13.2693	20.2139	42.1177	20.82	119.266	22.7178	0.19048	-2.39229	0.00343454	1.93431	down	--	--	--	--	--	--	HMDB0244582	--	Organic compounds	Lipids and lipid-like molecules	Fatty Acyls	Fatty acids and conjugates
neg_1932	PE(20:3(6,8,11)-OH(5)/P-18:1(11Z))	1894.14	1624.21	1933.13	1333.66	1733.52	337.213	274.221	591.901	877.457	605.129	1703.73	537.184	0.315299	-1.66521	6.04074e-05	2.01821	down	--	--	--	--	--	--	HMDB0285474	--	--	--	--	--
neg_1947	[(2-Hexylcyclopentylidene)amino]thiourea	50614.9	55830.9	46165.1	46944.4	47652.2	54604.5	57327.1	56076.7	50109.1	58800	49441.5	55383.5	1.12018	0.163733	0.033779	1.51655	up	--	--	--	--	--	--	--	--	--	--	--	--
neg_1950	Lithocholate 3-O-glucuronide	1514.26	1884.83	1362.08	1213.59	1474.33	1874.93	2584.73	2140.82	1613.9	2042.77	1489.82	2051.43	1.37697	0.461493	0.0234086	1.5608	up	--	--	LMST05010066	Sterol Lipids [ST]	Steroid conjugates [ST05]	Glucuronides [ST0501]	HMDB0002513	75239-91-7	Organic compounds	Lipids and lipid-like molecules	Steroids and steroid derivatives	Steroidal glycosides
neg_1971	5-Oxoavermectin ''1b'' aglycone	173.502	206.778	150.931	133.722	183.187	215.87	263.584	220.66	182.515	203.363	169.624	217.198	1.28047	0.356673	0.0324645	1.46599	up	C11962	Metabolic pathways(ko01100)	--	--	--	--	--	--	--	--	--	--
neg_1972	C16143	1056.4	554.733	768.527	770.107	816.051	441.245	119.05	379.347	479.829	366.279	793.164	357.15	0.450285	-1.15109	0.00302283	1.76771	down	--	--	--	--	--	--	--	--	--	--	--	--
neg_1979	C05497	359.995	410.435	323.334	302.333	369.111	435.072	474.046	411.234	367.811	396.177	353.042	416.868	1.18079	0.239752	0.0397001	1.42165	up	--	--	--	--	--	--	--	--	--	--	--	--
neg_1985	Hexadecanoic acid	15.7522	15.9376	24.1306	18.9899	20.849	2.3671	10.3817	9.38872	11.1979	6.57479	19.1319	7.98205	0.417212	-1.26115	0.00111171	1.90831	down	C00249	Fatty acid biosynthesis(ko00061);;Fatty acid elongation(ko00062);;Fatty acid degradation(ko00071);;Biosynthesis of unsaturated fatty acids(ko01040);;Metabolic pathways(ko01100);;Fatty acid metabolism(ko01212)	LMFA01010001	Fatty Acyls [FA]	Fatty Acids and Conjugates [FA01]	Straight chain fatty acids [FA0101]	HMDB0000885	601-34-3	Organic compounds	Lipids and lipid-like molecules	Steroids and steroid derivatives	Steroid esters
neg_1986	13(S)-HODE	3197.46	2314.9	4879.38	4515.31	4033.41	1225.8	1346.03	1641.03	2155.45	1548.42	3788.09	1583.35	0.41798	-1.25849	0.00660675	1.86272	down	C14762	Linoleic acid metabolism(ko00591);;PPAR signaling pathway(ko03320)	--	--	--	--	--	--	--	--	--	--
neg_1988	13-Hydroxy-9-methoxy-10-oxo-11-octadecenoic acid	179.413	124.213	266.601	207.439	217.334	50.071	72.3269	78.0717	104.706	69.8568	199	75.0065	0.376917	-1.40768	0.00400805	1.9123	down	--	--	--	--	--	--	HMDB0040901	150147-08-3	Organic compounds	Lipids and lipid-like molecules	Fatty Acyls	Lineolic acids and derivatives
neg_2006	PE(P-18:1(11Z)/18:1(12Z)-2OH(9,10))	22.3692	32.6294	19.1641	10.9843	23.1034	47.1038	48.3853	43.5184	21.7497	42.0958	21.6501	40.5706	1.87392	0.906063	0.0149283	1.62688	up	--	--	--	--	--	--	HMDB0285432	--	--	--	--	--
neg_2008	3alpha,7alpha,12beta-Trihydroxy-5beta-cholanoic acid	44.0781	24.4248	63.8892	61.0174	53.9869	9.86269	5.41249	10.4281	24.5196	12.7093	49.4793	12.5864	0.254378	-1.97496	0.00400633	1.88132	down	--	--	--	--	--	--	HMDB0000312	71883-64-2	Organic compounds	Lipids and lipid-like molecules	Steroids and steroid derivatives	Bile acids, alcohols and derivatives
neg_2012	di-trans,poly-cis-Undecaprenyl diphosphate	11165.4	14826.6	13723.9	9904.92	11846.7	15359.2	14929.8	17824.3	12669.4	16008	12293.5	15358.2	1.24929	0.321109	0.0358505	1.44075	up	C04574	Terpenoid backbone biosynthesis(ko00900)	LMPR03030008	Prenol Lipids [PR]	Polyprenols [PR03]	Bactoprenol diphosphates [PR0303]	--	--	--	--	--	--
neg_2019	PE(20:1(11Z)/16:0)	1318.15	1206.6	1837.38	1681.97	1744.83	1032.82	1177.43	958.285	1083.76	1051.42	1557.78	1060.74	0.680931	-0.554419	0.0138654	1.80004	down	--	--	LMGP02010847	Glycerophospholipids [GP]	Glycerophosphoethanolamines [GP02]	Diacylglycerophosphoethanolamines [GP0201]	HMDB0009253	--	Organic compounds	Lipids and lipid-like molecules	Glycerophospholipids	Glycerophosphoethanolamines
neg_2037	S-Methyl hexadecanethioate	43.4537	29.2055	50.825	39.613	45.5291	6.26504	1.73533	12.856	14.973	4.54549	41.7253	8.07497	0.193527	-2.36939	0.000110674	2.03236	down	--	--	--	--	--	--	--	--	--	--	--	--
neg_2038	Tenofovir exalidex	8426.46	6739.68	5554.76	4502.53	6107.43	8867.88	8597.72	8634.48	8596.51	7874.97	6266.17	8514.31	1.35877	0.442305	0.0240689	1.68124	up	--	--	--	--	--	--	HMDB0250380	--	Organic compounds	Organoheterocyclic compounds	Imidazopyrimidines	Purines and purine derivatives
neg_2040	5beta-Cyprinolsulfate	537.8	522.976	417.325	400.98	471.691	583.813	538.948	535.074	527.878	541.891	470.154	545.521	1.1603	0.2145	0.0484113	1.50598	up	C05468	Primary bile acid biosynthesis(ko00120)	LMST05020004	Sterol Lipids [ST]	Steroid conjugates [ST05]	Sulfates [ST0502]	HMDB0006888	--	Organic compounds	Lipids and lipid-like molecules	Steroids and steroid derivatives	Bile acids, alcohols and derivatives
neg_2053	Taxa-4(20),11(12)-dien-5alpha,13alpha-diol	362.505	353.066	558.979	416.391	448.879	111.22	131.774	136.435	172.964	126.467	427.964	135.772	0.31725	-1.65631	0.000910125	2.05584	down	C11897	Metabolic pathways(ko01100)	LMPR0104390005	Prenol Lipids [PR]	Isoprenoids [PR01]	C20 isoprenoids (diterpenes) [PR0104]	--	--	--	--	--	--
neg_2055	(±)13-HDoHE	19037.9	16973.3	30290.5	26162.5	24101.8	4038.26	4474.12	5152.45	8017.52	5808.54	23313.2	5498.18	0.23584	-2.08412	0.00113219	2.03405	down	--	--	--	--	--	--	--	--	--	--	--	--
neg_2057	Mevastatin	2920.55	2570.14	3949.39	3519.22	3481.19	901.267	1090.02	1031	1335.81	1095.92	3288.1	1090.81	0.331743	-1.59186	0.000466846	2.074	down	C13963	--	--	--	--	--	HMDB0254692	--	Organic compounds	Organoheterocyclic compounds	Lactones	Delta valerolactones
neg_2060	Erinacine C	153.248	134.756	178.207	158.208	137.512	48.1313	49.5491	75.1119	98.2494	69.9519	152.386	68.1987	0.447538	-1.15992	0.00013411	2.00042	down	--	--	--	--	--	--	HMDB0040389	156101-09-6	Organic compounds	Organoheterocyclic compounds	Quinolines and derivatives	Benzoquinolines
neg_2066	Ganodermic acid TQ	354.151	405.808	318.822	285.709	337.829	442.716	514.458	463.249	385.844	423.004	340.464	445.854	1.30955	0.38907	0.0069686	1.71391	up	--	--	--	--	--	--	HMDB0037893	112430-66-7	Organic compounds	Lipids and lipid-like molecules	Prenol lipids	Triterpenoids
neg_2068	1-Stearoylglycerophosphoserine	281.671	331.476	293.383	213.953	275.91	375.737	487.227	470.674	307.674	366.026	279.279	401.467	1.43752	0.523578	0.018552	1.6168	up	--	--	--	--	--	--	HMDB0061698	--	Organic compounds	Lipids and lipid-like molecules	Glycerophospholipids	Glycerophosphoserines
neg_2070	Deoxycholylphenylalanine	5188.71	5431.9	4446.95	4354.58	4684.5	6319.45	6722.71	5803.98	5210.86	5812.52	4821.33	5973.9	1.23906	0.309243	0.00890692	1.69381	up	--	--	--	--	--	--	HMDB0242413	--	Organic compounds	Lipids and lipid-like molecules	Steroids and steroid derivatives	Bile acids, alcohols and derivatives
neg_2086	Dihydroactinidiolide	10.233	9.96585	21.6009	20.9517	19.0453	5.67779	1.30733	6.87866	9.85116	5.79968	16.3594	5.90292	0.360829	-1.47061	0.0115585	1.74067	down	--	--	--	--	--	--	HMDB0035240	15356-74-8	Organic compounds	Organoheterocyclic compounds	Benzofurans	--
neg_2088	Eicosapentaenoic acid	1117.84	1096.84	1938.39	1782.88	1566.8	600.24	406.795	699.55	951.543	673.047	1500.55	666.235	0.443993	-1.17139	0.00493577	1.85277	down	C06428	Biosynthesis of unsaturated fatty acids(ko01040)	--	--	--	--	HMDB0001999	10417-94-4	Organic compounds	Lipids and lipid-like molecules	Fatty Acyls	Fatty acids and conjugates
neg_2096	(±)16-HETE	51729.5	49536.6	77578.6	74044.4	65546.5	30574.4	23397.5	33753.7	44219.8	34865.3	63687.1	33362.1	0.523844	-0.93279	0.00305032	1.87502	down	--	--	--	--	--	--	--	--	--	--	--	--
neg_2101	Deoxyloganin	1438.11	1378.05	2082.13	2233.01	1902.35	897.255	517.514	834.989	1259.73	907.267	1806.73	883.351	0.488922	-1.03232	0.00290342	1.85476	down	C06071	Metabolic pathways(ko01100)	LMPR0102070005	Prenol Lipids [PR]	Isoprenoids [PR01]	C10 isoprenoids (monoterpenes) [PR0102]	HMDB0251007	--	Organic compounds	Lipids and lipid-like molecules	Prenol lipids	Terpene glycosides
neg_2102	DG(2:0/18:2(10E,12Z)+=O(9)/0:0)	511.797	438.761	462.333	552.173	502.504	406.868	315.97	391.336	454.216	394.771	493.513	392.632	0.795586	-0.329911	0.00968041	1.63503	down	--	--	--	--	--	--	HMDB0296955	--	--	--	--	--
neg_2106	all-trans-4-Hydroxyretinoic acid	12.0206	18.521	63.0451	32.492	33.1144	2.22892	0.595718	9.81723e-08	6.85747	1.27064	31.8386	2.19055	0.0688016	-3.86141	0.0272228	1.72818	down	C16677	Retinol metabolism(ko00830);;Metabolic pathways(ko01100)	LMPR01090025	Prenol Lipids [PR]	Isoprenoids [PR01]	Retinoids [PR0109]	HMDB0006254	66592-72-1	Organic compounds	Lipids and lipid-like molecules	Prenol lipids	Retinoids
neg_2108	PC(P-16:0/PGE1)	23603.1	22894.1	35142.3	34510.4	29733.5	14570.6	10515.3	15345.4	20122	16428.7	29176.7	15396.4	0.527695	-0.922224	0.00312376	1.86985	down	--	--	--	--	--	--	HMDB0289517	--	--	--	--	--
neg_2114	PE(20:1(11Z)/20:3(5Z,8Z,11Z))	20518.8	18811.5	32439.4	30743.7	26855.8	10179.9	6093.68	11168	15597.2	11490.9	25873.8	10905.9	0.421505	-1.24638	0.00256591	1.8977	down	--	--	--	--	--	--	HMDB0009265	--	Organic compounds	Lipids and lipid-like molecules	Glycerophospholipids	Glycerophosphoethanolamines
neg_2115	PE(22:1(13Z)/6 keto-PGF1alpha)	220.554	177.051	308.284	233.91	260.344	92.8193	68.4576	112.788	172.958	94.412	240.029	108.287	0.451142	-1.14835	0.00171272	1.89145	down	--	--	--	--	--	--	HMDB0283846	--	--	--	--	--
neg_2118	PE-NMe2(18:1(11Z)/22:5(4Z,7Z,10Z,13Z,16Z))	3016.8	2146.35	4869.36	3705.96	3547.74	483.775	402.984	561.781	921.413	600.493	3457.24	594.089	0.171839	-2.54087	0.00250755	2.00002	down	--	--	--	--	--	--	HMDB0114033	--	Organic compounds	Lipids and lipid-like molecules	Glycerophospholipids	Glycerophosphoethanolamines
neg_2131	Cholylcitrulline	1712.9	1771.28	1500.97	1554.69	1592.33	2031.6	1950.89	1853.9	1654.24	1729.97	1626.43	1844.12	1.13384	0.181221	0.0370254	1.47226	up	--	--	--	--	--	--	HMDB0242383	--	--	--	--	--
neg_2141	(R)-3,4-Dihydro-8-hydroxy-3-tridecyl-1H-2-benzopyran-1-one	1650.66	1507.43	2545.53	1519.05	1859.63	291.007	317.581	496.461	565.962	431.639	1816.46	420.53	0.231511	-2.11085	0.00131629	2.02849	down	--	--	--	--	--	--	HMDB0041302	158627-93-1	Organic compounds	Organoheterocyclic compounds	Benzopyrans	2-benzopyrans
neg_2143	N-Lauroyl Asparagine	95.6615	44.8332	270.133	231.104	129.024	9.81723e-08	9.81723e-08	9.81723e-08	9.81723e-08	9.81723e-08	154.151	9.81723e-08	6.36858e-10	-30.5483	0.0214805	1.75191	down	--	--	--	--	--	--	HMDB0242028	--	Organic compounds	Organic acids and derivatives	Carboxylic acids and derivatives	Amino acids, peptides, and analogues
neg_2146	C21484	722.435	898.621	901.514	911.6	849.824	1212.53	1454.78	1124.42	945.084	1150.39	856.799	1177.44	1.37423	0.458624	0.0138653	1.66018	up	--	--	--	--	--	--	--	--	--	--	--	--
neg_2152	8-[(1R,2R)-3-Oxo-2-{(Z)-pent-2-enyl}cyclopentyl]octanoate	173.38	206.011	198.373	233.132	204.722	165.893	116.138	161.679	164.748	129.791	203.123	147.65	0.726896	-0.460179	0.00431331	1.76656	down	C22503	--	--	--	--	--	--	--	--	--	--	--
neg_2158	8(S)-HETrE	2838.58	3283.46	5011.66	3283.91	3689.79	948.446	1023.71	1686.93	1736.28	1388.35	3621.48	1356.74	0.374638	-1.41643	0.00192184	1.96243	down	--	--	LMFA03050029	Fatty Acyls [FA]	Eicosanoids [FA03]	Hydroxy/hydroperoxyeicosatrienoic acids [FA0305]	--	--	--	--	--	--
neg_2185	3-Oxohexadecanoic acid	890.358	558.943	768.981	813.645	762.665	606.583	309.662	515.284	575.052	483.489	758.918	498.014	0.656215	-0.607759	0.008683	1.65077	down	--	--	--	--	--	--	HMDB0010733	--	Organic compounds	Lipids and lipid-like molecules	Fatty Acyls	Fatty acids and conjugates
neg_2190	Aypgkf	618.258	645.64	577.637	431.599	586.372	754.782	849.288	780.863	671.204	672.189	571.901	745.665	1.30384	0.382761	0.00870548	1.66604	up	--	--	--	--	--	--	--	--	--	--	--	--
neg_2196	Prolylhydroxyproline	128.229	92.5495	152.253	144.52	137.692	88.4977	97.0205	83.333	107.403	101.935	131.049	95.6378	0.729789	-0.454449	0.0233661	1.64556	down	--	--	--	--	--	--	HMDB0006695	18684-24-7	Organic compounds	Organic acids and derivatives	Carboxylic acids and derivatives	Amino acids, peptides, and analogues
neg_2205	35S-Methylokadaic acid 7-hexadecanoate	346.577	315.187	307.338	373.465	293.986	269.772	174.5	224.084	218.914	246.862	327.311	226.827	0.693001	-0.529071	0.00161797	1.80175	down	--	--	--	--	--	--	HMDB0030443	--	Organic compounds	Lipids and lipid-like molecules	Fatty Acyls	Fatty acid esters
neg_2229	PC(P-18:0/PGF1alpha)	162.074	116.959	251.849	225.427	180.696	40.5992	5.45377	47.3417	82.4834	30.5745	187.401	41.2905	0.220332	-2.18225	0.00153228	1.94404	down	--	--	--	--	--	--	HMDB0289625	--	--	--	--	--
neg_2230	Siderol	1877.86	1856.87	3247.75	2282.09	2394.76	515.487	485.873	772.995	867.3	659.44	2331.87	660.219	0.283129	-1.82047	0.00183504	2.00801	down	--	--	--	--	--	--	HMDB0034944	19885-22-4	Organic compounds	Lipids and lipid-like molecules	Prenol lipids	Diterpenoids
neg_2231	11-Dehydro-thromboxane B2	146.391	104.817	204.334	163.489	169.31	39.5115	34.9136	41.877	51.571	40.8646	157.668	41.7475	0.264781	-1.91713	0.00173832	2.02763	down	C05964	Arachidonic acid metabolism(ko00590);;Metabolic pathways(ko01100);;Serotonergic synapse(ko04726)	LMFA03030014	Fatty Acyls [FA]	Eicosanoids [FA03]	Thromboxanes [FA0303]	HMDB0004242	67910-12-7	Organic compounds	Lipids and lipid-like molecules	Fatty Acyls	Eicosanoids
neg_2254	(Z)-9-Cycloheptadecen-1-one	1801.59	1096.87	1420.66	2877.84	1824.81	1044.09	475.535	867.831	1091.43	839.652	1804.35	863.707	0.478679	-1.06287	0.0317312	1.53158	down	--	--	--	--	--	--	HMDB0031336	542-46-1	Organic compounds	Organic oxygen compounds	Organooxygen compounds	Carbonyl compounds
neg_2255	3alpha,11beta,21-Trihydroxy-20-oxo-5beta-pregnan-18-al	216.672	126.222	157.803	195.777	176.114	129.425	47.3847	105.666	124.257	91.5696	174.518	99.6604	0.571062	-0.808281	0.008165	1.64289	down	C05474	Steroid hormone biosynthesis(ko00140)	LMST02030275	Sterol Lipids [ST]	Steroids [ST02]	C21 steroids (gluco/mineralocorticoids, progestogins) and derivatives [ST0203]	HMDB0006753	--	Organic compounds	Lipids and lipid-like molecules	Steroids and steroid derivatives	Hydroxysteroids
neg_2258	CP 47,497-C8-homolog C-8-hydroxy metabolite	1691.23	1243.75	2689.07	2140.01	2043.99	266.826	179.859	316.868	521.201	371.823	1961.61	331.316	0.1689	-2.56576	0.00186587	2.01207	down	--	--	--	--	--	--	--	--	--	--	--	--
neg_2268	11beta,21-Dihydroxy-3,20-oxo-5beta-pregnan-18-al	25940.2	25218.5	24446.5	20944.4	27342.3	28413.7	33484.5	29186.1	27119.3	27093.1	24778.4	29059.4	1.17277	0.229922	0.0276176	1.47117	up	C05473	Steroid hormone biosynthesis(ko00140)	--	--	--	--	HMDB0006754	--	Organic compounds	Lipids and lipid-like molecules	Glycerolipids	Diradylglycerols
neg_2271	C16506	157.089	117.075	92.3092	80.1751	96.7249	82.7733	25.1599	24.741	28.4354	38.2968	108.675	39.8813	0.366979	-1.44623	0.00456453	1.71093	down	--	--	--	--	--	--	--	--	--	--	--	--
neg_2342	1-Octadecanoyl-2-(5Z,8Z,11Z,14Z-eicosatetraenoyl)-sn-glycero-3-phosphoethanolamine	1905.5	2700.82	1602.26	2020.89	1550.88	2787.94	2400.82	2954.49	2241.79	2350.71	1956.07	2547.15	1.30218	0.380924	0.0486703	1.44371	up	C21480	Ferroptosis(ko04216)	LMGP02010118	Glycerophospholipids [GP]	Glycerophosphoethanolamines [GP02]	Diacylglycerophosphoethanolamines [GP0201]	HMDB0009003	61216-62-4	Organic compounds	Lipids and lipid-like molecules	Glycerophospholipids	Glycerophosphoethanolamines
neg_2356	C21481	123.308	82.8154	93.3955	91.3398	82.9337	67.248	49.2105	81.8697	89.6382	63.0316	94.7584	70.1996	0.740827	-0.432792	0.0444594	1.33301	down	--	--	--	--	--	--	--	--	--	--	--	--
neg_2386	LysoPA(0:0/18:0)	788.118	792.444	712.511	704.597	734.652	913.055	959.104	809.714	751.732	848.937	746.464	856.508	1.14742	0.198394	0.0372508	1.49588	up	--	--	--	--	--	--	HMDB0007850	--	Organic compounds	Lipids and lipid-like molecules	Glycerophospholipids	Glycerophosphates
neg_2405	(7Z,10Z,13Z,16Z,19Z)-Docosapentaenoic acid	127.47	66.9468	100.484	87.4518	98.9473	75.1123	26.5257	66.8734	82.9763	64.2474	96.2601	63.147	0.656004	-0.608224	0.0436351	1.37026	down	C16513	Biosynthesis of unsaturated fatty acids(ko01040)	--	--	--	--	--	--	--	--	--	--
neg_2426	Petasitenine	65.524	52.0852	54.1202	25.1	46.9341	99.2882	59.2194	61.6992	84.7247	71.5004	48.7527	75.2864	1.54425	0.626907	0.0296483	1.44445	up	C10359	--	--	--	--	--	HMDB0030328	60102-37-6	Organic compounds	Organoheterocyclic compounds	Azaspirodecane derivatives	--
neg_2467	20-Hydroxy-6Z,15Z-eicosadienoic acid	74.1321	74.0389	76.342	77.9048	74.2455	49.556	47.1002	56.305	64.0021	48.6147	75.3327	53.1156	0.705081	-0.50414	0.00154512	1.99438	down	--	--	LMFA03000010	Fatty Acyls [FA]	Eicosanoids [FA03]	Other Eicosanoids [FA0300]	HMDB0245564	--	Organic compounds	Lipids and lipid-like molecules	Fatty Acyls	Fatty acids and conjugates
neg_2587	(13R,14R)-7-Labdene-13,14,15-triol	77.8706	63.2204	80.4963	71.5377	77.0079	65.8888	51.9184	59.2635	66.1884	63.3559	74.0266	61.323	0.828392	-0.271615	0.0144144	1.62489	down	--	--	--	--	--	--	HMDB0034958	--	Organic compounds	Lipids and lipid-like molecules	Prenol lipids	Diterpenoids
neg_2609	SM(d16:1/20:3(8Z,11Z,14Z)-2OH(5,6))	468.797	464.059	404.058	393.533	442.987	537.335	519.544	503.574	460.249	460.425	434.687	496.225	1.14157	0.191019	0.0228408	1.54317	up	--	--	--	--	--	--	HMDB0290273	--	--	--	--	--
neg_2672	1,2,10-Trihydroxydihydro-trans-linalyl oxide 7-O-beta-D-glucopyranoside	4138.99	3438.26	2366.78	2727.81	3187.08	5416.17	4846.83	4906.55	3926.72	4887.82	3171.79	4796.82	1.51234	0.596782	0.00342226	1.84036	up	--	--	--	--	--	--	HMDB0033237	219814-37-6	Organic compounds	Organic oxygen compounds	Organooxygen compounds	Carbohydrates and carbohydrate conjugates
neg_2678	(R)-Mevalonate	104.231	60.0683	62.8567	41.7096	66.0971	96.1559	91.8472	117.091	88.2032	102.771	66.9924	99.2136	1.48097	0.56654	0.0310718	1.5891	up	C00418	Terpenoid backbone biosynthesis(ko00900);;Metabolic pathways(ko01100);;Ferroptosis(ko04216)	--	--	--	--	HMDB0000227	17817-88-8	Organic compounds	Lipids and lipid-like molecules	Fatty Acyls	Fatty acids and conjugates
neg_2737	Juvenile hormone III acid	30.6187	75.7512	51.6342	27.2592	46.5108	94.7357	82.3758	70.5651	52.3152	80.3203	46.3548	76.0624	1.64087	0.714465	0.0300835	1.44477	up	C16504	Insect hormone biosynthesis(ko00981)	--	--	--	--	--	--	--	--	--	--
neg_2748	20,26-Dihydroxyecdysone	55.6816	58.4537	54.6378	43.7292	53.2863	59.8759	61.8567	72.2735	66.2486	63.6935	53.1577	64.7896	1.21882	0.285484	0.00806925	1.69817	up	C16500	Insect hormone biosynthesis(ko00981)	LMST01010184	Sterol Lipids [ST]	Sterols [ST01]	Cholesterol and derivatives [ST0101]	HMDB0245570	--	Organic compounds	Lipids and lipid-like molecules	Steroids and steroid derivatives	Bile acids, alcohols and derivatives
neg_2789	Panaquinquecol 5	547.187	546.46	556.121	391.896	479.435	567.243	683	655.176	578.846	578.133	504.22	612.48	1.21471	0.28061	0.0263391	1.50493	up	--	--	--	--	--	--	HMDB0039356	122122-03-6	Organic compounds	Organoheterocyclic compounds	Epoxides	--
neg_2805	Ginsenoside C-K	1925.67	1899.2	1861.76	1515.63	1797.02	2070.96	2231.38	2072.58	1994.88	1919.37	1799.85	2057.83	1.14333	0.193247	0.0241821	1.51522	up	C22127	--	--	--	--	--	HMDB0252724	--	Organic compounds	Lipids and lipid-like molecules	Prenol lipids	Triterpenoids
neg_2831	Versalide	17.2969	30.3988	26.963	11.3559	20.8493	33.6665	32.5159	48.2155	36	23.2423	21.3728	34.7281	1.62487	0.700325	0.0352765	1.41599	up	--	--	--	--	--	--	HMDB0259795	--	Organic compounds	Benzenoids	Tetralins	--
neg_2885	6-beta-hydroxydexamethasone	2009.6	1052.56	1817.8	1508.74	1750.89	871.11	895.869	1265.41	1202.2	1014.62	1627.92	1049.84	0.644899	-0.632855	0.0205841	1.58848	down	--	--	--	--	--	--	HMDB0061022	--	Organic compounds	Lipids and lipid-like molecules	Steroids and steroid derivatives	Hydroxysteroids
neg_2900	Ecdysone	19156.4	13113.3	15073.2	10761.3	9053	10145.7	8525.62	5551.66	8249.16	6806.1	13431.4	7855.65	0.584871	-0.77381	0.0302038	1.52029	down	C00477	Insect hormone biosynthesis(ko00981);;Apoptosis - fly(ko04214)	LMST01010210	Sterol Lipids [ST]	Sterols [ST01]	Cholesterol and derivatives [ST0101]	HMDB0251684	--	Organic compounds	Lipids and lipid-like molecules	Steroids and steroid derivatives	Bile acids, alcohols and derivatives
neg_2912	18-Hydroxycorticosterone	2488.14	1202.41	2205.32	3466.14	2553.9	1330.42	1431.67	1779.3	679.298	1556.94	2383.18	1355.53	0.568788	-0.814036	0.0455842	1.39148	down	C01124	Steroid hormone biosynthesis(ko00140);;Metabolic pathways(ko01100);;Aldosterone synthesis and secretion(ko04925)	LMST02030091	Sterol Lipids [ST]	Steroids [ST02]	C21 steroids (gluco/mineralocorticoids, progestogins) and derivatives [ST0203]	HMDB0000319	561-65-9	Organic compounds	Lipids and lipid-like molecules	Steroids and steroid derivatives	Hydroxysteroids
neg_2944	C06054	595.706	596.256	581.148	522.712	621.872	662.403	784.625	651.123	615.007	638.275	583.539	670.287	1.14866	0.19995	0.0415803	1.42302	up	--	--	--	--	--	--	--	--	--	--	--	--
neg_429	Urea-1-carboxylate	35.651	40.1174	35.2242	28.83	27.9468	40.9909	66.6562	49.9427	42.6602	47.2855	33.5539	49.5071	1.47545	0.561157	0.0211577	1.60454	up	C01010	Arginine biosynthesis(ko00220);;Metabolic pathways(ko01100)	--	--	--	--	HMDB0248159	--	Organic compounds	Organic acids and derivatives	Organic carbonic acids and derivatives	Ureas
neg_465	Arabinonic acid	164.879	92.8665	74.6059	74.8627	90.0808	188.032	139.351	140.487	155.551	156.15	99.4591	155.914	1.56762	0.648578	0.0244428	1.60877	up	--	--	--	--	--	--	HMDB0000539	488-30-2	Organic compounds	Organic oxygen compounds	Organooxygen compounds	Carbohydrates and carbohydrate conjugates
neg_467	5,6-Dihydro-5-fluorouracil	16.3301	17.9059	17.6869	23.692	33.8795	18.0963	16.9455	8.38956	10.7948	6.70798	21.8989	12.1868	0.556504	-0.845537	0.043599	1.45993	down	C16630	Drug metabolism - other enzymes(ko00983)	--	--	--	--	HMDB0060402	--	Organic compounds	Organoheterocyclic compounds	Diazines	Pyrimidines and pyrimidine derivatives
neg_595	(R)-2-(4-(Tert-butoxycarbonyl)morpholin-3-yl)acetic acid	29.9303	14.7329	42.4342	43.3046	39.4494	28.5037	9.07309	3.34272	18.8989	21.1553	33.9703	16.1947	0.476732	-1.06875	0.0352492	1.4982	down	--	--	--	--	--	--	HMDB0247375	--	Organic compounds	Organoheterocyclic compounds	Oxazinanes	Morpholines
neg_610	Estradiol-17beta 3-sulfate	213.026	230.133	366.824	446.274	322.864	427.053	467.507	558.247	489.61	521.373	315.824	492.758	1.56023	0.641757	0.0110309	1.67537	up	C08357	Steroid hormone biosynthesis(ko00140);;Bile secretion(ko04976)	LMST05020005	Sterol Lipids [ST]	Steroid conjugates [ST05]	Sulfates [ST0502]	HMDB0004448	481-96-9	Organic compounds	Lipids and lipid-like molecules	Steroids and steroid derivatives	Sulfated steroids
neg_611	beta-D-glucosaminyl-(1->4)-beta-D-glucosamine	43.1354	57.9805	75.5523	97.905	72.0901	90.4422	94.7344	118.527	97.6385	115.293	69.3327	103.327	1.49031	0.575612	0.0170837	1.59103	up	--	--	--	--	--	--	HMDB0249120	--	Organic compounds	Organic oxygen compounds	Organooxygen compounds	Carbohydrates and carbohydrate conjugates
neg_904	2,2,2-Trifluoroethyl	109.097	97.3046	118.446	133.332	116.597	149.981	118.946	138.605	147.888	138.742	114.955	138.832	1.20771	0.27227	0.018223	1.52402	up	--	--	--	--	--	--	HMDB0244040	--	Organic compounds	Organohalogen compounds	Organofluorides	--
neg_970	2-Isopropylmalic acid	162.412	135.946	180.059	202.797	173.658	324.873	224.053	316.018	343.616	288.121	170.974	299.336	1.75077	0.807987	0.00153772	1.89116	up	C02504	Valine, leucine and isoleucine biosynthesis(ko00290);;Pyruvate metabolism(ko00620);;Metabolic pathways(ko01100);;2-Oxocarboxylic acid metabolism(ko01210);;Biosynthesis of amino acids(ko01230)	--	--	--	--	HMDB0000402	49601-06-1	Organic compounds	Lipids and lipid-like molecules	Fatty Acyls	Fatty acids and conjugates
neg_971	Niridazole	406.4	287.92	420.364	466.974	406.677	786.3	544.02	808.92	829.696	711.981	397.667	736.184	1.85126	0.888505	0.00108018	1.91579	up	C19268	--	--	--	--	--	HMDB0255625	--	Organic compounds	Organoheterocyclic compounds	Azoles	Thiazoles
neg_977	5-Phosphooxy-L-lysine	66.7506	35.9405	47.2294	54.6925	47.9211	118.402	71.2961	121.128	129.258	100.087	50.5068	108.035	2.13901	1.09694	0.00270945	1.88091	up	C03366	Lysine degradation(ko00310);;Metabolic pathways(ko01100)	--	--	--	--	--	--	--	--	--	--
neg_978	Shikimate 3-phosphate	94.0093	85.1213	108.054	107.735	105.159	180.907	134.558	187.921	215.707	160.212	100.016	175.861	1.75833	0.814208	0.00349108	1.8694	up	C03175	Phenylalanine, tyrosine and tryptophan biosynthesis(ko00400);;Metabolic pathways(ko01100);;Biosynthesis of amino acids(ko01230)	--	--	--	--	HMDB0301781	63959-45-5	Organic compounds	Organic acids and derivatives	Organic phosphoric acids and derivatives	Phosphate esters
neg_979	Cytosine	43.1788	49.936	109.173	124.529	89.2899	179.82	99.2591	187.536	333.956	203.81	83.2213	200.876	2.41376	1.27128	0.0324263	1.48413	up	C00380	Pyrimidine metabolism(ko00240);;Metabolic pathways(ko01100);;Nucleotide metabolism(ko01232)	--	--	--	--	HMDB0000630	71-30-7	Organic compounds	Organoheterocyclic compounds	Diazines	Pyrimidines and pyrimidine derivatives
neg_980	1-(5'-Phosphoribosyl)-5-amino-4-imidazolecarboxamide	8.55865	7.90328	19.5513	23.0124	18.4438	44.7868	20.2332	47.2551	79.1601	49.6927	15.4939	48.2256	3.11256	1.6381	0.0220063	1.60346	up	C04677	Purine metabolism(ko00230);;Histidine metabolism(ko00340);;Metabolic pathways(ko01100);;AMPK signaling pathway(ko04152)	--	--	--	--	HMDB0001517	3031-94-5	Organic compounds	Nucleosides, nucleotides, and analogues	Imidazole ribonucleosides and ribonucleotides	1-ribosyl-imidazolecarboxamides
pos_1004	D-Glucono-1,5-lactone 6-phosphate	27.2551	40.5129	24.9178	34.2674	28.4636	21.6334	25.561	25.0139	16.2449	20.2165	31.0834	21.734	0.699215	-0.516192	0.0266923	1.47521	down	C01236	Pentose phosphate pathway(ko00030);;Metabolic pathways(ko01100);;Carbon metabolism(ko01200)	--	--	--	--	HMDB0001127	2641-81-8	Organic compounds	Organic oxygen compounds	Organooxygen compounds	Carbohydrates and carbohydrate conjugates
pos_10069	Cyclopassifloic acid A	9572.01	9177.87	9290.31	10299.3	10211.7	6801.91	6423.64	6498.5	7357.21	7993.01	9710.24	7014.85	0.722418	-0.469094	0.000121783	1.99071	down	--	--	--	--	--	--	HMDB0035943	292167-34-1	Organic compounds	Lipids and lipid-like molecules	Steroids and steroid derivatives	Cycloartanols and derivatives
pos_1009	7,8-Dihydro-7,8-dihydroxykynurenate	625.757	646.626	716.219	835.938	786.77	587.224	262.669	410.778	424.208	545.655	722.262	446.107	0.617652	-0.695133	0.0052118	1.76066	down	C01249	Tryptophan metabolism(ko00380)	--	--	--	--	--	--	--	--	--	--
pos_1018	Pindolol	7.99081	6.93074	15.0338	16.6391	20.3741	8.98834	9.81723e-08	9.81723e-08	5.75402	4.65029	13.3937	3.87853	0.289579	-1.78797	0.0182567	1.64437	down	C07445	--	--	--	--	--	HMDB0015095	13523-86-9	Organic compounds	Organoheterocyclic compounds	Indoles and derivatives	Indoles
pos_1020	N-Formyl-L-aspartate	15.1314	23.1706	24.0572	42.934	26.4449	15.4239	5.84863	10.2697	20.0818	12.8204	26.3476	12.8889	0.489186	-1.03154	0.0397057	1.4882	down	C01044	Histidine metabolism(ko00340);;Metabolic pathways(ko01100)	--	--	--	--	HMDB0060495	--	Organic compounds	Organic acids and derivatives	Carboxylic acids and derivatives	Amino acids, peptides, and analogues
pos_1021	Cyanuric acid	70.8076	76.409	63.3155	89.8516	73.7212	65.9059	41.981	46.431	56.2788	60.0988	74.821	54.1391	0.723582	-0.466772	0.0101354	1.62356	down	C06554	Metabolic pathways(ko01100)	--	--	--	--	HMDB0041861	108-80-5	Organic compounds	Organoheterocyclic compounds	Triazines	1,3,5-triazines
pos_1033	S-(3-Oxo-3-carboxy-n-propyl)cysteine	23.7434	27.8329	23.2786	49.4656	28.2509	23.4246	6.79348	10.3308	19.4617	8.64196	30.5143	13.7305	0.449969	-1.1521	0.0238405	1.54065	down	--	--	--	--	--	--	HMDB0002135	87458-26-2	Organic compounds	Organic acids and derivatives	Carboxylic acids and derivatives	Amino acids, peptides, and analogues
pos_1035	3,4-Dihydro-7-methoxy-2-methylene-3-oxo-2H-1,4-benzoxazine-5-carboxylic acid	20.6236	24.9599	71.2123	61.1909	64.5326	13.6126	3.07282	10.5257	35.7374	20.2489	48.5039	16.6395	0.343055	-1.54349	0.0375828	1.55692	down	C11468	Metabolic pathways(ko01100)	--	--	--	--	--	--	--	--	--	--
pos_1038	alpha-D-Ribose 1-methylphosphonate 5-phosphate	112.87	98.4203	124.832	132.22	125.351	97.8906	73.6241	75.6274	104.115	88.001	118.739	87.8517	0.739873	-0.43465	0.00643325	1.74823	down	C20423	Phosphonate and phosphinate metabolism(ko00440);;Metabolic pathways(ko01100)	--	--	--	--	--	--	--	--	--	--
pos_1044	Difluorodeoxyuridine	491.825	399.591	927.052	1108.11	807.821	329.679	219.523	233.702	506.633	375.573	746.879	333.022	0.445885	-1.16526	0.0321328	1.59509	down	--	--	--	--	--	--	--	--	--	--	--	--
pos_1045	Methylcysteine	21.7323	20.3652	34.4403	40.7238	32.1961	15.7442	10.0845	11.414	23.9727	12.5938	29.8916	14.7618	0.493846	-1.01787	0.0139213	1.68809	down	--	--	--	--	--	--	HMDB0002108	1187-84-4	Organic compounds	Organic acids and derivatives	Carboxylic acids and derivatives	Amino acids, peptides, and analogues
pos_1046	4-Hydroxy-6-methyl-3-(1H-pyrazol-3-yl)-2H-pyran-2-one	120.91	120.912	145.066	119.037	116.799	255.724	288.256	223.529	239.362	256.071	124.545	252.588	2.02809	1.02012	5.04328e-05	2.05445	up	--	--	--	--	--	--	--	--	--	--	--	--
pos_1051	2-Phenylethanol glucuronide	133.978	57.8334	180.328	258.919	189.717	145.552	16.5434	5.35292	75.7249	86.8574	164.155	66.0062	0.402097	-1.31439	0.0492713	1.41315	down	--	--	--	--	--	--	HMDB0010350	--	Organic compounds	Organic oxygen compounds	Organooxygen compounds	Carbohydrates and carbohydrate conjugates
pos_1056	lys-met	43.3177	6.8196	51.2368	67.0359	49.441	39.7352	9.81723e-08	9.81723e-08	8.06325	9.31938	43.5702	11.4236	0.262188	-1.93133	0.0343069	1.48572	down	--	--	--	--	--	--	HMDB0028957	97729-52-7	Organic compounds	Organic acids and derivatives	Carboxylic acids and derivatives	Amino acids, peptides, and analogues
pos_1066	3-Amino-2,3-dideoxy-scyllo-inosose	4.92512	3.55471	4.87616	7.31433	3.2699	6.54845	7.7058	9.02776	14.2554	6.87088	4.78804	8.88166	1.85497	0.891392	0.0417064	1.43273	up	C17581	Neomycin, kanamycin and gentamicin biosynthesis(ko00524)	--	--	--	--	--	--	--	--	--	--
pos_1075	2-Propylsuccinic acid	8660.92	7920.99	11992	11639.8	11551	11634.8	14296.3	15234.3	19561.8	16749	10352.9	15495.3	1.4967	0.581788	0.0138126	1.58899	up	C16657	Drug metabolism - cytochrome P450(ko00982)	--	--	--	--	--	--	--	--	--	--
pos_1077	2-Methyl-2-[(1-oxo-2-propenyl)amino]-1-propanesulfonic acid	1077.33	1236.93	634.574	451.989	814.116	1788.81	2842.05	1905.7	1626.69	1439.06	842.986	1920.46	2.27817	1.18787	0.00762893	1.73406	up	--	--	--	--	--	--	HMDB0031200	15214-89-8	Organic compounds	Organic acids and derivatives	Organic sulfonic acids and derivatives	Organosulfonic acids and derivatives
pos_1078	Phensuximide	320.777	345.092	192.496	122.136	243.937	496.17	823.882	556.507	480.008	448.063	244.887	560.926	2.29055	1.19569	0.00608316	1.76048	up	C07437	--	--	--	--	--	HMDB0014970	86-34-0	Organic compounds	Organoheterocyclic compounds	Pyrrolidines	Phenylpyrrolidines
pos_11498	PC(P-18:1(11Z)/18:3(10,12,15)-OH(9))	1879.43	7193.84	7197.43	5899.39	1795.59	9599.93	10682.2	7547.41	8340.37	9504.75	4793.14	9134.93	1.90583	0.930423	0.0202434	1.56817	up	--	--	--	--	--	--	HMDB0289721	--	--	--	--	--
pos_1187	NTP	11.2424	36.4098	26.0612	29.4993	25.8972	25.1272	43.8087	51.6863	48.2293	39.1163	25.822	41.5936	1.61078	0.687761	0.0346606	1.42611	up	C00201	--	--	--	--	--	HMDB0060500	--	Organic compounds	Organic oxygen compounds	Organooxygen compounds	Carbohydrates and carbohydrate conjugates
pos_12299	Rhizocticin C	8875.84	5564.84	4959.02	1730.37	4921.59	2371.79	319.123	90.67	92.7329	476.25	5210.33	670.113	0.128612	-2.9589	0.0128723	1.68289	down	C17960	Phosphonate and phosphinate metabolism(ko00440)	--	--	--	--	--	--	--	--	--	--
pos_12498	CDP-ethanolamine	120.425	127.662	133.164	120.277	141.767	140.412	149.154	137.027	139.554	148.084	128.659	142.846	1.11027	0.150909	0.021849	1.49706	up	C00570	Glycerophospholipid metabolism(ko00564);;Metabolic pathways(ko01100)	--	--	--	--	HMDB0001564	3036-18-8	Organic compounds	Nucleosides, nucleotides, and analogues	Pyrimidine nucleotides	Pyrimidine ribonucleotides
pos_1353	Indoxyl	8.62295	10.5174	12.2099	11.1869	11.3451	7.89381	10.5263	8.97692	8.16637	8.69448	10.7765	8.85158	0.821381	-0.283877	0.0365941	1.50471	down	C05658	Tryptophan metabolism(ko00380)	--	--	--	--	HMDB0004094	480-93-3	Organic compounds	Organoheterocyclic compounds	Indoles and derivatives	Hydroxyindoles
pos_1356	N-acetyl zonisamide	36.8628	44.4208	45.8303	9.04186	32.4424	13.478	24.8764	6.25789	12.6854	10.6752	33.7196	13.5946	0.403166	-1.31056	0.0354819	1.53647	down	--	--	--	--	--	--	HMDB0060603	68936-43-6	Organic compounds	Organoheterocyclic compounds	Benzisoxazoles	--
pos_1413	L-Methionine	43.4604	26.476	40.7155	60.4279	44.7532	27.6991	16.9441	24.769	33.8159	27.3411	43.1666	26.1138	0.604955	-0.7251	0.0310584	1.51453	down	C00073	Cysteine and methionine metabolism(ko00270);;D-Amino acid metabolism(ko00470);;Aminoacyl-tRNA biosynthesis(ko00970);;Metabolic pathways(ko01100);;2-Oxocarboxylic acid metabolism(ko01210);;Biosynthesis of amino acids(ko01230);;Biosynthesis of cofactors(ko01240);;Antifolate resistance(ko01523);;Efferocytosis(ko04148);;Protein digestion and absorption(ko04974);;Mineral absorption(ko04978);;Cobalamin…	--	--	--	--	HMDB0033951	59-51-8	Organic compounds	Organic acids and derivatives	Carboxylic acids and derivatives	Amino acids, peptides, and analogues
pos_1417	5-amino-1-(5-phosphonato-D-ribosyl)imidazol-3-ium	81.4473	49.4104	73.0646	108.269	74.6464	52.9233	34.9436	44.5865	60.7934	48.8398	77.3675	48.4173	0.625809	-0.676205	0.0339016	1.50331	down	--	--	--	--	--	--	HMDB0062575	--	Organic compounds	Organic oxygen compounds	Organooxygen compounds	Carbohydrates and carbohydrate conjugates
pos_1725	Prunasin	6.40646	3.82281	11.5949	4.36664	12.6872	9.81723e-08	9.81723e-08	4.49974	1.04726	9.81723e-08	7.7756	1.1094	0.142677	-2.80917	0.0182742	1.66666	down	C00844	Metabolic pathways(ko01100)	--	--	--	--	HMDB0034934	99-18-3	Organic compounds	Organic oxygen compounds	Organooxygen compounds	Carbohydrates and carbohydrate conjugates
pos_1743	trans-o-Hydroxybenzylidenepyruvate	26.3006	25.2423	40.6549	13.6495	27.7376	53.1687	33.2641	46.8897	52.7709	44.5669	26.717	46.1321	1.72669	0.788012	0.0089772	1.60741	up	C06203	Metabolic pathways(ko01100)	--	--	--	--	--	--	--	--	--	--
pos_1755	Melibiitol	15.9683	67.7698	79.7459	80.6785	55.8037	9.81723e-08	22.8129	35.0283	30.7624	21.156	59.9933	21.9519	0.365906	-1.45045	0.0295701	1.57167	down	C05399	Galactose metabolism(ko00052)	--	--	--	--	HMDB0006791	--	Organic compounds	Lipids and lipid-like molecules	Fatty Acyls	Fatty acyl glycosides
pos_1920	Carmofur	39.327	41.0285	57.9199	22.1606	36.4347	20.9934	7.38548	9.81723e-08	8.8415	14.0632	39.3742	10.2567	0.260494	-1.94068	0.0038124	1.84844	down	C13252	Drug metabolism - other enzymes(ko00983)	--	--	--	--	HMDB0249685	--	Organic compounds	Organoheterocyclic compounds	Diazines	Pyrimidines and pyrimidine derivatives
pos_2131	Clavulanate-9-aldehyde	31.1344	26.1945	27.7994	29.3869	29.774	33.3133	35.3311	33.1611	29.071	33.9592	28.8578	32.9672	1.1424	0.192065	0.0167256	1.61983	up	C06661	Metabolic pathways(ko01100)	--	--	--	--	--	--	--	--	--	--
pos_2158	20-Hydroxyleukotriene E4	63.0672	57.1347	5.37661	32.5492	46.8341	9.81723e-08	9.81723e-08	6.98019	6.1094	9.81723e-08	40.9924	2.61792	0.0638636	-3.96886	0.0194844	1.62719	down	C03577	Arachidonic acid metabolism(ko00590)	--	--	--	--	--	--	--	--	--	--
pos_2173	6,7-Didehydrofevicordin F 3-[glucosyl-(1->6)-glucoside]	48.8035	78.2701	23.3539	19.9711	24.2594	9.81723e-08	3.86117	8.48499	11.3489	9.81723e-08	38.9316	4.73901	0.121726	-3.03829	0.0353481	1.52042	down	--	--	--	--	--	--	HMDB0036337	178062-90-3	Organic compounds	Lipids and lipid-like molecules	Steroids and steroid derivatives	Steroidal glycosides
pos_2181	Aeruginosin 98-B	41.3506	27.0712	19.4177	12.876	53.8665	1.33105	6.20563	8.03118	2.98953	14.6866	30.9164	6.64879	0.215057	-2.21721	0.028189	1.55622	down	--	--	--	--	--	--	--	--	--	--	--	--
pos_2332	Gabapentin	115.599	97.6433	87.0004	48.175	93.2103	120.621	131.747	138.543	193.311	111.636	88.3257	139.172	1.57566	0.65596	0.0243074	1.50025	up	C07018	--	--	--	--	--	HMDB0005015	60142-96-3	Organic compounds	Organic acids and derivatives	Carboxylic acids and derivatives	Amino acids, peptides, and analogues
pos_2727	DG(a-25:0/LTE4/0:0)	10.1168	7.89546	7.20231	9.81723e-08	9.81723e-08	4.24635	24.8964	41.6793	35.0561	53.6553	5.0429	31.9067	6.32705	2.66153	0.0301457	1.64136	up	--	--	--	--	--	--	HMDB0298170	--	--	--	--	--
pos_2772	L-Histidine	134.411	93.1202	97.3583	62.3302	79.6842	125.348	120.204	154.338	127.976	145.539	93.3807	134.681	1.44228	0.528352	0.0220343	1.63734	up	C00135	Histidine metabolism(ko00340);;beta-Alanine metabolism(ko00410);;D-Amino acid metabolism(ko00470);;Aminoacyl-tRNA biosynthesis(ko00970);;Metabolic pathways(ko01100);;Biosynthesis of amino acids(ko01230);;ABC transporters(ko02010);;Protein digestion and absorption(ko04974);;Central carbon metabolism in cancer(ko05230)	--	--	--	--	HMDB0000177	71-00-1	Organic compounds	Organic acids and derivatives	Carboxylic acids and derivatives	Amino acids, peptides, and analogues
pos_4789	Coenzyme F420	94.7119	144.231	164.012	208.084	182.574	88.242	99.3815	118.972	107.489	103.942	158.723	103.605	0.652745	-0.615409	0.0430388	1.54693	down	C00876	Metabolic pathways(ko01100);;Biosynthesis of cofactors(ko01240)	--	--	--	--	--	--	--	--	--	--
pos_5000	Traumatic acid	6.78905	55.086	40.3081	47.1049	56.0286	12.9085	1.38578	0.950791	0.857507	1.58582	41.0633	3.53769	0.086152	-3.53697	0.0123237	1.8056	down	C16308	alpha-Linolenic acid metabolism(ko00592)	LMFA01170002	Fatty Acyls [FA]	Fatty Acids and Conjugates [FA01]	Dicarboxylic acids [FA0117]	HMDB0000933	6402-36-4	Organic compounds	Lipids and lipid-like molecules	Fatty Acyls	Fatty acids and conjugates
pos_5214	(5E)-4-[(E)-3-(4-hydroxyphenyl)prop-2-enoyl]oxy-2-methyl-5-[2-[(2R,3R,4S,5S,6R)-3,4,5-trihydroxy-6-(hydroxymethyl)oxan-2-yl]oxyethylidene]cyclopentene-1-carboxylic acid	111.401	203.799	100.125	192.929	162.57	85.5382	22.2693	8.94778	22.3667	32.4353	154.165	34.3115	0.222564	-2.16771	0.00208683	1.85006	down	--	--	--	--	--	--	--	--	--	--	--	--
pos_5314	Capecitabine	304.532	201.019	154.702	133.535	193.476	121.548	18.5967	6.08564	29.9649	43.1562	197.453	43.8704	0.222182	-2.17019	0.0035119	1.75864	down	C12650	Drug metabolism - other enzymes(ko00983)	--	--	--	--	HMDB0015233	154361-50-9	Organic compounds	Nucleosides, nucleotides, and analogues	5'-deoxyribonucleosides	--
pos_5346	3-hydroxy-C10-homoserine lactone	81.4539	127.014	142.173	38.2072	59.0681	123.207	302.353	162.445	231.536	178.162	89.5832	199.541	2.22743	1.15538	0.0210003	1.51966	up	--	--	--	--	--	--	--	--	--	--	--	--
pos_5473	Deoxyguanidinoproclavaminic acid	8.83551	4.23233	10.1143	7.11365	8.28634	8.16469	16.0492	12.7982	11.8788	12.0428	7.71643	12.1867	1.57932	0.659306	0.0248378	1.49391	up	C06656	Metabolic pathways(ko01100)	--	--	--	--	--	--	--	--	--	--
pos_5642	Urocortisol	178.257	126.333	314.45	260.049	242.365	129.519	66.5488	90.3565	109.622	97.8771	224.291	98.7847	0.440432	-1.18301	0.0157993	1.76236	down	C05472	Steroid hormone biosynthesis(ko00140)	LMST02030143	Sterol Lipids [ST]	Steroids [ST02]	C21 steroids (gluco/mineralocorticoids, progestogins) and derivatives [ST0203]	HMDB0000949	1953-02-01	Organic compounds	Lipids and lipid-like molecules	Steroids and steroid derivatives	Hydroxysteroids
pos_5728	trichostatin A	26.8154	23.8236	28.2314	31.3904	28.9256	15.1434	10.8254	15.5156	23.7918	17.235	27.8373	16.5022	0.592811	-0.754356	0.00290854	1.8501	down	--	--	--	--	--	--	HMDB0259177	--	Organic compounds	Organic oxygen compounds	Organooxygen compounds	Carbonyl compounds
pos_5776	3-Hydroxy-9,10-secoandrosta-1,3,5(10)-triene-9,17-dione	571.164	991.281	721.417	936.5	876.197	493.757	324.154	447.766	537.219	464.958	819.312	453.571	0.5536	-0.853085	0.00569727	1.81332	down	C19944	Metabolic pathways(ko01100)	--	--	--	--	--	--	--	--	--	--
pos_6245	7-Methylxanthine	1.42142	2.75708	1.04486	5.24052	1.39496	9.81723e-08	9.81723e-08	9.81723e-08	9.81723e-08	9.81723e-08	2.37177	9.81723e-08	4.13921e-08	-24.5261	0.0375695	1.54725	down	C16353	Caffeine metabolism(ko00232);;Metabolic pathways(ko01100)	--	--	--	--	HMDB0001991	552-62-5	Organic compounds	Organoheterocyclic compounds	Imidazopyrimidines	Purines and purine derivatives
pos_6255	1,2-dihydroxyheptadec-16-yn-4-yl acetate	1006.67	1036.35	1642.07	2188.09	1705.29	1058.53	486.644	635.769	838.609	790.16	1515.69	761.942	0.502702	-0.992225	0.0238339	1.63459	down	--	--	LMFA05000645	Fatty Acyls [FA]	Fatty alcohols [FA05]	-	HMDB0031049	28884-46-0	Organic compounds	Lipids and lipid-like molecules	Fatty Acyls	Fatty alcohols
pos_6310	L-2,4-Diaminobutanoate	52.1145	45.562	59.939	86.8763	59.1169	49.9924	30.7149	39.4621	42.0541	44.5009	60.7218	41.3449	0.680891	-0.554505	0.0490496	1.43543	down	C03283	Glycine, serine and threonine metabolism(ko00260);;Metabolic pathways(ko01100);;2-Oxocarboxylic acid metabolism(ko01210);;Biosynthesis of amino acids(ko01230)	--	--	--	--	HMDB0006284	1758-80-1	Organic compounds	Organic acids and derivatives	Carboxylic acids and derivatives	Amino acids, peptides, and analogues
pos_6312	APC	1102.48	437.149	330.49	226.703	499.461	1365.91	385.481	1003.86	1443.61	1296.02	519.256	1098.98	2.11644	1.08164	0.0481759	1.41082	up	C16542	Drug metabolism - other enzymes(ko00983)	--	--	--	--	HMDB0060661	--	Organic compounds	Alkaloids and derivatives	Camptothecins	--
pos_6367	2-[5-[(3,5-Dimethyl-1H-pyrrol-2-yl)methylidene]-4-methoxy-2-pyrrolylidene]indole	25.7153	31.2897	83.2891	47.8995	44.8018	10.1982	12.3221	7.44546	9.76113	11.0703	46.5991	10.1594	0.218018	-2.19748	0.0220137	1.77002	down	--	--	--	--	--	--	--	--	--	--	--	--
pos_6394	N-Oleoylglycine	393.084	367.048	366.048	383.58	388.852	304.511	302.844	257.677	284.606	314.502	379.723	292.828	0.771163	-0.374891	0.000223741	2.00519	down	--	--	--	--	--	--	HMDB0013631	2601-90-3	Organic compounds	Organic acids and derivatives	Carboxylic acids and derivatives	Amino acids, peptides, and analogues
pos_6433	N6-(L-1,3-Dicarboxypropyl)-L-lysine	109.246	55.6648	95.398	62.4263	95.8484	62.383	17.8414	35.2373	52.7196	49.1362	83.7166	43.4635	0.519174	-0.945711	0.0162346	1.59716	down	C00449	Lysine biosynthesis(ko00300);;Lysine degradation(ko00310);;Metabolic pathways(ko01100);;Biosynthesis of amino acids(ko01230)	--	--	--	--	HMDB0000279	997-68-2	Organic compounds	Organic acids and derivatives	Carboxylic acids and derivatives	Amino acids, peptides, and analogues
pos_6477	delta-Tocotrienol	131.157	169.444	380.91	410.342	300.341	131.922	38.6312	65.3729	93.5119	87.7198	278.439	83.4316	0.299641	-1.73869	0.022365	1.71005	down	C14156	Ubiquinone and other terpenoid-quinone biosynthesis(ko00130);;Metabolic pathways(ko01100)	LMPR02020056	Prenol Lipids [PR]	Quinones and hydroquinones [PR02]	Vitamin E [PR0202]	HMDB0030008	25612-59-3	Organic compounds	Lipids and lipid-like molecules	Prenol lipids	Quinone and hydroquinone lipids
pos_6564	D-Urobilinogen	2120.73	1558.52	1606.77	2831.63	1940.66	1739.02	1155.9	1400.85	1073.28	1225.54	2011.66	1318.92	0.655635	-0.609034	0.0367649	1.4364	down	C05791	Porphyrin metabolism(ko00860);;Metabolic pathways(ko01100)	--	--	--	--	HMDB0004158	17208-65-0	Organic compounds	Organoheterocyclic compounds	Tetrapyrroles and derivatives	Bilirubins
pos_6587	Hexadecanedioic acid mono-L-carnitine ester	225.433	261.515	386.608	504.875	352.374	240.294	147.427	181.149	219.128	214.058	346.161	200.411	0.578954	-0.78848	0.0388523	1.55971	down	--	--	LMFA07070007	Fatty Acyls [FA]	Fatty esters [FA07]	Fatty acyl carnitines [FA0707]	HMDB0000712	42150-38-9	Organic compounds	Lipids and lipid-like molecules	Fatty Acyls	Fatty acid esters
pos_6588	7-Sulfocholic acid	161.778	14.6642	167.202	35.3634	37.4326	179.469	105.02	770.873	823.969	881.959	83.288	552.258	6.6307	2.72916	0.0485049	1.52236	up	--	--	LMST05020039	Sterol Lipids [ST]	Steroid conjugates [ST05]	Sulfates [ST0502]	HMDB0002421	60320-05-0	Organic compounds	Lipids and lipid-like molecules	Steroids and steroid derivatives	Bile acids, alcohols and derivatives
pos_6622	Armillarin	140446	101438	119769	27297.2	69535.4	121347	122014	161135	167138	179251	91697	150177	1.63775	0.711718	0.041958	1.45767	up	--	--	--	--	--	--	HMDB0039380	83329-14-0	Organic compounds	Organic oxygen compounds	Organooxygen compounds	Carbohydrates and carbohydrate conjugates
pos_6635	5,6,7,8-Tetrahydromonapterin	9.30224	2.29564	3.40756	7.19789	9.75436	11.4384	5.33167	18.1691	17.4988	24.7508	6.39154	15.4378	2.41534	1.27223	0.0493727	1.47489	up	C21007	Folate biosynthesis(ko00790)	--	--	--	--	--	--	--	--	--	--
pos_668	PS(20:5(5Z,8Z,11Z,14Z,17Z)/22:6(5Z,7Z,10Z,13Z,16Z,19Z)-OH(4))	44.0741	44.6592	53.5323	49.5848	47.2347	36.771	37.9839	39.8938	39.6036	40.9326	47.817	39.037	0.816383	-0.292682	0.00454237	1.87698	down	--	--	--	--	--	--	HMDB0282849	--	--	--	--	--
pos_669	PA(16:1(9Z)/LTE4)	51.8723	49.6449	60.2407	58.2989	58.0983	37.0716	48.6438	45.0876	37.2258	30.8617	55.631	39.7781	0.715035	-0.483915	0.00420018	1.81203	down	--	--	--	--	--	--	HMDB0263404	--	--	--	--	--
pos_6718	LysoPC 16-2	27.0168	22.8861	31.7426	45.0368	26.197	24.4737	13.8155	15.5111	18.9312	18.4665	30.5759	18.2396	0.596536	-0.745319	0.0299872	1.54676	down	--	--	--	--	--	--	--	--	--	--	--	--
pos_6730	Cholic Acid, Methyl Ester	228.01	295.916	488.088	617.17	402.21	183.345	79.1003	110.142	146.245	126.485	406.279	129.063	0.317672	-1.65439	0.0139799	1.78317	down	--	--	--	--	--	--	--	--	--	--	--	--
pos_6792	3-Hydroxy-9-hexadecenoylcarnitine	1579.5	1568.19	2979.41	3261.58	2439.41	1537.83	496.296	731.373	1008.52	1026.89	2365.62	960.181	0.40589	-1.30084	0.0117632	1.74351	down	--	--	--	--	--	--	HMDB0013333	--	Organic compounds	Lipids and lipid-like molecules	Fatty Acyls	Fatty acid esters
pos_6881	Hydroxyhomodestruxin B	203.87	225.544	337.528	536.717	345.172	178.42	138.953	125.635	136.946	147.614	329.766	145.514	0.441263	-1.18029	0.0346917	1.61304	down	--	--	--	--	--	--	HMDB0039897	--	Organic compounds	Organic acids and derivatives	Peptidomimetics	Depsipeptides
pos_6988	Morinidazole	9.63695	17.989	8.85885	7.38721	11.6293	11.5383	9.81723e-08	3.90559	5.92012	3.54917	11.1003	4.98263	0.448875	-1.15562	0.0499041	1.36829	down	--	--	--	--	--	--	HMDB0254886	--	Organic compounds	Organoheterocyclic compounds	Azoles	Imidazoles
pos_7049	(±)-Myristoylcarnitine	5966.03	7866.54	12025.4	11135.2	9855.31	6883.58	2692.88	3263.12	4255.49	4692.74	9369.69	4357.56	0.46507	-1.10448	0.00684126	1.79222	down	--	--	--	--	--	--	--	--	--	--	--	--
pos_7067	1-(2-Furyl)butan-3-one	12.5093	9.81723e-08	11.9322	2.0446	1.81741	10.2284	6.13617	24.4059	24.6514	23.4377	5.6607	17.7719	3.13952	1.65055	0.0395678	1.45549	up	--	--	--	--	--	--	HMDB0032290	699-17-2	Organic compounds	Organoheterocyclic compounds	Heteroaromatic compounds	--
pos_7076	alpha-Methylstyrene	15248.7	4438.62	15381.3	8497.53	11537.9	14832.5	11097.8	26565.5	24739.9	24853.3	11020.8	20417.8	1.85266	0.889598	0.0406777	1.44601	up	C14395	--	--	--	--	--	HMDB0059899	--	Organic compounds	Benzenoids	Benzene and substituted derivatives	Phenylpropenes
pos_7077	L-Fucono-1,5-lactone	65.2477	22.8348	74.1467	44.1137	43.4055	71.1379	58.1985	101.758	97.7739	93.774	49.9497	84.5285	1.69227	0.758962	0.0234898	1.51389	up	C18028	Fructose and mannose metabolism(ko00051);;Metabolic pathways(ko01100)	--	--	--	--	--	--	--	--	--	--
pos_7078	(4-Methylphenyl)acetaldehyde	736.734	183.723	800.683	408.595	525.054	691.213	575.952	1262.09	1150.82	1167.7	530.958	969.557	1.82605	0.868729	0.041286	1.4231	up	--	--	--	--	--	--	HMDB0029639	104-09-6	Organic compounds	Benzenoids	Benzene and substituted derivatives	Phenylacetaldehydes
pos_7098	2'-O-methyladenosine	1596.3	407.656	1795.74	900.841	1282.36	1504.15	1285.03	2766.26	2480.84	2563.76	1196.58	2120.01	1.77172	0.825154	0.0469407	1.39014	up	--	--	--	--	--	--	HMDB0004326	2140-79-6	Organic compounds	Nucleosides, nucleotides, and analogues	Purine nucleosides	--
pos_7100	alpha-1,5-L-Arabinobiose	147.43	51.3749	162.784	74.3003	102.042	142.228	106.384	330.607	288.802	294.877	107.586	232.579	2.16179	1.11223	0.0482808	1.45221	up	C20570	ABC transporters(ko02010)	--	--	--	--	--	--	--	--	--	--
pos_7118	Clausarinol	815314	503758	743068	343133	584273	855629	686796	989510	907192	1.04005e+06	597909	895834	1.49828	0.583306	0.0233374	1.55015	up	--	--	--	--	--	--	HMDB0041407	--	Organic compounds	Phenylpropanoids and polyketides	Coumarins and derivatives	Pyranocoumarins
pos_7121	O-(1->4)-alpha-L-Dihydrostreptosyl-streptidine 6-phosphate	310014	187381	305843	66920.6	189295	340559	293970	410218	363589	421694	211890	366006	1.72734	0.788549	0.0228535	1.5852	up	C04767	Metabolic pathways(ko01100)	--	--	--	--	--	--	--	--	--	--
pos_7126	Desisobutyrylciclesonide	4554.15	1975.94	4710.59	840.293	996.333	5094.01	4722.77	6390.74	5398.87	5980.52	2615.46	5517.38	2.10953	1.07692	0.02324	1.63063	up	--	--	--	--	--	--	HMDB0251048	--	Organic compounds	Lipids and lipid-like molecules	Steroids and steroid derivatives	Hydroxysteroids
pos_7165	Tunicamycin VI	13.5197	1.96078	65.9912	0.0018304	0.0986712	24.2674	32.6237	98.9427	82.8487	73.4937	16.3144	62.4352	3.82699	1.93621	0.0441873	1.37323	up	--	--	--	--	--	--	--	--	--	--	--	--
pos_7178	Dodecylbenzene	2124.12	2147.42	2199.99	2463.89	2441.81	1724.27	2057.72	1383.57	1449.2	1641.39	2275.45	1651.23	0.725673	-0.462609	0.00329934	1.83738	down	--	--	--	--	--	--	HMDB0251572	--	Organic compounds	Benzenoids	Benzene and substituted derivatives	--
pos_7179	9-Oxononanoic acid	170.915	206.76	164.773	177.758	171.862	137.838	165.946	96.155	107.476	126.326	178.413	126.748	0.710418	-0.49326	0.00934881	1.6986	down	C16322	alpha-Linolenic acid metabolism(ko00592)	--	--	--	--	HMDB0094711	--	Organic compounds	Lipids and lipid-like molecules	Fatty Acyls	Fatty acids and conjugates
pos_7184	Sphingosine-1-phosphate	4908.54	6202.08	4415.5	4558.31	5096.34	4113.5	4977.29	2279.25	2307.07	3076.87	5036.16	3350.8	0.665348	-0.58782	0.0306221	1.50138	down	--	--	LMSP01050001	Sphingolipids [SP]	Sphingoid bases [SP01]	Sphingoid base 1-phosphates [SP0105]	HMDB0000277	26993-30-6	Organic compounds	Lipids and lipid-like molecules	Sphingolipids	Phosphosphingolipids
pos_7216	3-O-Acetylepisamarcandin	160591	69734.6	159463	7872.68	41198.4	161540	141068	194712	168155	202558	87772	173606	1.97792	0.983987	0.0481604	1.46858	up	--	--	--	--	--	--	HMDB0031958	61490-18-4	Organic compounds	Phenylpropanoids and polyketides	Coumarins and derivatives	--
pos_7307	delta-Dodecalactone	66.7556	31.4012	56.8254	31.912	48.9336	31.8055	9.22611	17.6291	26.2061	15.5942	47.1656	20.0922	0.425993	-1.2311	0.0134295	1.65783	down	--	--	LMFA07040040	Fatty Acyls [FA]	Fatty esters [FA07]	Lactones [FA0704]	HMDB0037742	3051-22-7	Organic compounds	Organoheterocyclic compounds	Lactones	Delta valerolactones
pos_7311	(2S)-2-Hydroxyhexadecanoylcarnitine	10129.5	8936.97	14998.6	9225.93	9875.36	10249.8	3515.51	5109.05	6623.05	6925.51	10633.3	6484.59	0.609839	-0.713499	0.0302714	1.52864	down	--	--	--	--	--	--	HMDB0241459	--	Organic compounds	Lipids and lipid-like molecules	Fatty Acyls	Fatty acid esters
pos_7354	Digitoxigenin 3-[glucosyl-(1->6)-glucosyl-(1->4)-2,6-dideoxyribohexoside]	53381.3	41552.9	49411	4589.48	19669	45683.2	46905	73466.7	78245.9	80917.6	33720.7	65043.7	1.92889	0.947773	0.0333627	1.47442	up	--	--	--	--	--	--	HMDB0034321	220710-06-5	Organic compounds	Lipids and lipid-like molecules	Steroids and steroid derivatives	Steroid lactones
pos_7375	Viloxazine	1474.36	1269.59	1041.58	1402.57	1276.74	1005.17	652.041	789.574	1065.9	921.641	1292.97	886.866	0.685915	-0.543899	0.0047758	1.6919	down	--	--	--	--	--	--	HMDB0259807	--	Organic compounds	Benzenoids	Phenol ethers	--
pos_7439	Octadecyl fumarate	96.7093	101.585	141.512	179.786	110.549	98.1637	45.5172	42.7527	63.1953	68.7237	126.028	63.6705	0.505208	-0.98505	0.0122581	1.68402	down	--	--	LMFA07010979	Fatty Acyls [FA]	Fatty esters [FA07]	Wax monoesters [FA0701]	HMDB0038073	1741-93-1	Organic compounds	Lipids and lipid-like molecules	Fatty Acyls	Fatty acid esters
pos_7442	(9Z,12Z,15Z)-3-Hydroxyoctadecatrienoylcarnitine	433.599	488.5	639.445	548.405	524.433	477.293	305.592	245.339	257.034	325.013	526.876	322.054	0.611252	-0.71016	0.00552954	1.78877	down	--	--	LMFA07070027	Fatty Acyls [FA]	Fatty esters [FA07]	Fatty acyl carnitines [FA0707]	HMDB0240763	--	Organic compounds	Lipids and lipid-like molecules	Fatty Acyls	Fatty acid esters
pos_7511	1-(3-Carboxypropylcarbamoyl)-5-fluorouracil	127.462	111.02	119.572	68.9566	100.412	144.551	137.49	165.691	155.153	156.453	105.484	151.868	1.43972	0.525784	0.00688494	1.78518	up	--	--	--	--	--	--	HMDB0243786	--	Organic compounds	Organic acids and derivatives	Carboxylic acids and derivatives	Amino acids, peptides, and analogues
pos_7517	3-Hydroxy-11Z-octadecenoylcarnitine	19.5096	10.7381	11.6821	9.81723e-08	9.81723e-08	34.7589	17.7078	29.7027	32.1689	22.9278	8.38596	27.4532	3.27371	1.71093	0.0047963	1.75199	up	--	--	--	--	--	--	HMDB0013339	--	Organic compounds	Lipids and lipid-like molecules	Fatty Acyls	Fatty acid esters
pos_7559	Guanidinoacetate	84.8136	53.047	63.1657	40.7767	54.9248	84.1694	59.6437	100.571	95.4869	88.6444	59.3456	85.703	1.44414	0.530206	0.0322237	1.49396	up	C00581	Glycine, serine and threonine metabolism(ko00260);;Arginine and proline metabolism(ko00330);;Metabolic pathways(ko01100)	--	--	--	--	HMDB0000128	352-97-6	Organic compounds	Organic acids and derivatives	Carboxylic acids and derivatives	Amino acids, peptides, and analogues
pos_7561	Levamisole	76.1673	55.6383	63.1116	40.892	56.6064	75.6627	67.6965	86.3524	75.0226	83.0803	58.4831	77.5629	1.32624	0.407347	0.0257995	1.58213	up	C07070	--	--	--	--	--	HMDB0014986	14769-73-4	Organic compounds	Organoheterocyclic compounds	Imidazothiazoles	--
pos_7582	Glu Gly Met Phe	132.641	77.0435	75.3282	63.5133	59.2829	111.356	107.379	201.782	163.788	134.295	81.5617	143.72	1.7621	0.8173	0.0243229	1.5857	up	--	--	--	--	--	--	--	--	--	--	--	--
pos_7615	Pedein B	73.3823	25.4037	36.3488	9.81723e-08	9.81723e-08	81.7172	43.1294	176.156	153.534	98.1991	27.027	110.547	4.09026	2.03219	0.0222623	1.60624	up	--	--	--	--	--	--	--	--	--	--	--	--
pos_7672	Lucidenic acid D1	30.2533	23.9812	12.1572	14.9012	12.6902	38.4047	26.5275	54.1493	62.4957	49.2283	18.7966	46.1611	2.45582	1.29621	0.00812734	1.76588	up	--	--	--	--	--	--	HMDB0038199	97653-95-7	Organic compounds	Lipids and lipid-like molecules	Prenol lipids	Triterpenoids
pos_769	Deoxyinosine	295.674	223.579	299.218	262.277	305.205	205.955	167.442	175.386	189.03	198.832	277.19	187.329	0.675813	-0.565303	0.00217786	1.91484	down	C05512	Purine metabolism(ko00230);;Metabolic pathways(ko01100);;Nucleotide metabolism(ko01232);;ABC transporters(ko02010)	--	--	--	--	HMDB0000071	890-38-0	Organic compounds	Nucleosides, nucleotides, and analogues	Purine nucleosides	Purine 2'-deoxyribonucleosides
pos_7696	N-[(2S)-1-[[(2S)-1-Amino-1-oxopropan-2-yl]amino]-3-naphthalen-2-yl-1-oxopropan-2-yl]-N'-hydroxy-2-(2-methylpropyl)butanediamide	10.8622	9.81723e-08	45.8102	10.3451	14.6701	60.9211	33.3838	55.3212	83.4408	65.4666	16.3375	59.7067	3.65457	1.8697	0.0047709	1.67831	up	--	--	--	--	--	--	HMDB0258718	--	Organic compounds	Organic acids and derivatives	Carboxylic acids and derivatives	Amino acids, peptides, and analogues
pos_7859	Ser Gly Tyr Phe	39.0547	47.3174	50.288	30.1046	37.4644	37.4915	34.8547	22.3818	21.9184	21.4159	40.8458	27.6125	0.676017	-0.564869	0.0305507	1.51946	down	--	--	--	--	--	--	--	--	--	--	--	--
pos_7971	3beta,7alpha-Dihydroxy-5-cholestenoate	86.3017	100.909	111.505	87.0974	79.4942	93.4647	55.3685	69.0003	73.1323	76.017	93.0615	73.3966	0.788689	-0.342471	0.0480598	1.41397	down	C17335	Primary bile acid biosynthesis(ko00120)	--	--	--	--	HMDB0012454	115538-84-6	Organic compounds	Lipids and lipid-like molecules	Steroids and steroid derivatives	Bile acids, alcohols and derivatives
pos_799	5-Fluorouridine diphosphate	332.235	311.219	360.501	292.382	374.326	225.025	307.257	218.754	255.35	263.923	334.133	254.062	0.760362	-0.395242	0.00647466	1.74301	down	C21748	Drug metabolism - other enzymes(ko00983)	--	--	--	--	--	--	--	--	--	--
pos_8005	Lepidiumterpenyl ester	32369.3	40696.6	51221.3	44403.8	46428.2	41106.6	25358.1	24722.9	26525	32348.3	43023.9	30012.2	0.697571	-0.519588	0.0185313	1.62883	down	--	--	--	--	--	--	HMDB0036865	255833-57-9	Organic compounds	Lipids and lipid-like molecules	Prenol lipids	Sesquiterpenoids
pos_8118	Methyl jasmonate	16.2497	19.6518	32.2417	33.4846	23.8146	15.666	11.0283	16.0201	12.2513	15.1868	25.0885	14.0305	0.55924	-0.83846	0.0285782	1.63831	down	C11512	alpha-Linolenic acid metabolism(ko00592)	LMFA02020010	Fatty Acyls [FA]	Octadecanoids [FA02]	Jasmonic acids [FA0202]	HMDB0036583	1211-29-6	Organic compounds	Lipids and lipid-like molecules	Fatty Acyls	Lineolic acids and derivatives
pos_8128	LysoPC(20:4(5Z,8Z,11Z,14Z)/0:0)	15854.3	11247	11558.3	10309.4	13064.2	17167.4	13647.5	16058.5	14930.8	15817.2	12406.6	15524.3	1.25129	0.323414	0.0302593	1.54706	up	--	--	--	--	--	--	HMDB0010395	60701-99-7	Organic compounds	Lipids and lipid-like molecules	Glycerophospholipids	Glycerophosphocholines
pos_8155	9-OxoODE	23.062	10.8693	15.2268	22.4399	21.9965	4.67772	5.53981	6.26042	9.40458	6.28872	18.7189	6.43425	0.34373	-1.54065	0.00517883	1.82938	down	C14766	Linoleic acid metabolism(ko00591)	LMFA02000251	Fatty Acyls [FA]	Octadecanoids [FA02]	Other Octadecanoids [FA0200]	HMDB0004669	--	Organic compounds	Lipids and lipid-like molecules	Fatty Acyls	Lineolic acids and derivatives
pos_8170	CL(8:0/10:0/10:0/14:0)	4882.92	4810.5	4892.79	4907.66	5110.06	4929.31	3517.35	3469.44	3666.49	4207.02	4920.79	3957.92	0.804327	-0.314146	0.0239241	1.67681	down	--	--	--	--	--	--	HMDB0117434	--	Organic compounds	Lipids and lipid-like molecules	Glycerophospholipids	Glycerophosphoglycerophosphoglycerols
pos_8202	beta-Acetyldigoxin	202.56	211.826	209.274	198.802	218.932	207.121	169.145	151.989	163.656	178.881	208.279	174.159	0.83618	-0.258115	0.0180156	1.69565	down	C22190	--	--	--	--	--	--	--	--	--	--	--
pos_8220	Taxa-4(20),11(12)-dien-5alpha-ol	83.5176	108.763	120.666	109.625	109.161	84.9258	80.9073	69.8506	58.8085	73.2899	106.346	73.5564	0.691668	-0.531849	0.00316644	1.84974	down	C11895	Metabolic pathways(ko01100)	LMPR0104390003	Prenol Lipids [PR]	Isoprenoids [PR01]	C20 isoprenoids (diterpenes) [PR0104]	--	--	--	--	--	--
pos_8221	PGF2α Alcohol methyl ether	1882.89	2229.08	2284.96	2350.71	2222.58	1879.68	1797.36	1308.52	1207.56	1527.64	2194.04	1544.15	0.703792	-0.506778	0.00447463	1.82151	down	--	--	--	--	--	--	--	--	--	--	--	--
pos_8302	PI(20:1(11Z)/TXB2)	4373.75	6572.39	7308.85	6192.02	6498.11	4733.88	5987.87	3682.27	3249.57	4308.04	6189.03	4392.33	0.709696	-0.494727	0.0297939	1.54023	down	--	--	--	--	--	--	HMDB0277105	--	--	--	--	--
pos_8335	3-(2,4-Dimethyl-5-(2-oxo-1,2-dihydroindol-3-ylidenemethyl)-1H-pyrrol-3-yl)propionic acid	8.93051	7.44332	9.50642	4.59281	6.6575	9.21172	10.0033	11.1432	12.9326	8.44473	7.42611	10.3471	1.39334	0.47855	0.0379106	1.38746	up	--	--	--	--	--	--	HMDB0258528	--	Organic compounds	Organoheterocyclic compounds	Indoles and derivatives	Indolines
pos_8341	MG(0:0/20:1(11Z)/0:0)	15747.2	22097.2	37374.5	36316.4	33563.5	19824.9	11267.7	11654.2	12333.2	13399.8	29019.7	13696	0.471953	-1.08328	0.0198684	1.71811	down	--	--	--	--	--	--	HMDB0011543	--	Organic compounds	Lipids and lipid-like molecules	Endocannabinoids	--
pos_839	4-Methylene-L-glutamate	64.7456	60.5515	49.7741	60.2717	57.853	71.9109	79.7433	84.6129	75.6268	85.1439	58.6392	79.4075	1.35417	0.437412	0.000391022	2.00083	up	C00651	C5-Branched dibasic acid metabolism(ko00660)	--	--	--	--	HMDB0029433	16804-57-2	Organic compounds	Organic acids and derivatives	Carboxylic acids and derivatives	Amino acids, peptides, and analogues
pos_8392	Phosphatidylcholine lyso alkyl 16_0	2884.72	2652.73	2089.02	3479.19	2853.04	2403.8	1480.35	1736.39	2102.34	2009.17	2791.74	1946.41	0.697203	-0.520348	0.0169633	1.54838	down	--	--	--	--	--	--	--	--	--	--	--	--
pos_8523	MG(0:0/16:0/0:0)	483.231	568.928	542.954	311.913	483.426	661.306	640.026	770.359	633.359	635.385	478.09	668.087	1.39741	0.482753	0.00929315	1.69799	up	--	--	LMGL01010025	Glycerolipids [GL]	Monoradylglycerols [GL01]	Monoacylglycerols [GL0101]	HMDB0011533	--	Organic compounds	Lipids and lipid-like molecules	Glycerolipids	Monoradylglycerols
pos_8577	Trihexosylceramide (d18_1_16_0)	3462.38	3426.86	3673.81	4399.34	4130.58	3547.29	3119.9	2934.37	2954.8	3096.46	3818.59	3130.57	0.819822	-0.286618	0.0192524	1.61854	down	--	--	--	--	--	--	--	--	--	--	--	--
pos_863	5-Hydroxyectoine	1132.92	1298.1	991.797	942.86	1164.05	1214.57	1264.74	1414.04	1356.82	1372.58	1105.95	1324.55	1.19766	0.260221	0.0227837	1.60473	up	C16432	Glycine, serine and threonine metabolism(ko00260);;Metabolic pathways(ko01100)	--	--	--	--	--	--	--	--	--	--
pos_8643	2-Methylbutyroylcarnitine	1130.12	1067.19	972.623	859.798	1034.29	1278	1261.93	1176.93	998.773	1173.3	1012.8	1177.79	1.1629	0.217726	0.0406991	1.43977	up	--	--	LMFA07070034	Fatty Acyls [FA]	Fatty esters [FA07]	Fatty acyl carnitines [FA0707]	HMDB0000378	31023-25-3	Organic compounds	Lipids and lipid-like molecules	Fatty Acyls	Fatty acid esters
pos_8644	(6S)-Hydroxyhyoscyamine	181.619	170.557	165.456	146.207	161.835	203.708	213.092	190.205	167.912	175.174	165.135	190.018	1.15068	0.202492	0.0451353	1.41145	up	C03325	Metabolic pathways(ko01100)	--	--	--	--	--	--	--	--	--	--
pos_8646	Hepoxilin A3	75.2826	79.6778	66.6937	67.6482	75.713	84.0909	92.1998	80.9299	75.8366	83.4044	73.003	83.2923	1.14094	0.190227	0.0226587	1.5473	up	C04849	--	LMFA03090005	Fatty Acyls [FA]	Eicosanoids [FA03]	Hepoxilins [FA0309]	HMDB0004688	85589-24-8	Organic compounds	Lipids and lipid-like molecules	Fatty Acyls	Eicosanoids
pos_8677	Dapdiamide B	209.165	185.596	181.752	140.139	189.449	224.769	233.276	244.991	192.906	222.842	181.22	223.757	1.23472	0.304187	0.0187333	1.60217	up	C20963	Metabolic pathways(ko01100)	--	--	--	--	--	--	--	--	--	--
pos_871	Leu Pro	3434.91	2998.43	2214.77	2045.78	2814.3	4044.21	3869.01	3761.52	3605.76	4077.83	2701.64	3871.66	1.43308	0.51912	0.00772284	1.84731	up	--	--	--	--	--	--	--	--	--	--	--	--
pos_8715	Ecgonine methyl ester	56.5759	36.5297	27.0779	29.9588	40.7918	50.685	46.9048	82.7667	59.2212	65.9818	38.1868	61.1119	1.60034	0.678379	0.0242924	1.6017	up	C12448	Metabolic pathways(ko01100)	--	--	--	--	HMDB0006406	7143-09-01	Organic compounds	Alkaloids and derivatives	Tropane alkaloids	--
pos_874	o-1821	670.919	483.897	682.154	527.298	635.284	761.566	754.11	685.33	697.945	763.544	599.911	732.499	1.22101	0.288079	0.0254238	1.54777	up	--	--	--	--	--	--	--	--	--	--	--	--
pos_8800	Ricinoleic acid methyl ester	1729.31	1934.24	1982.81	1506.14	1870.77	2173.17	1852.2	2255.99	1961.16	2092.03	1804.66	2066.91	1.14532	0.195751	0.0487974	1.34667	up	--	--	--	--	--	--	--	--	--	--	--	--
pos_8810	PE(16:0/0:0)	43911.2	49442.9	50935.4	29909.5	46520	57152.1	51008	61582.3	50019.5	57160.9	44143.8	55384.6	1.25464	0.327274	0.0387666	1.44236	up	--	--	LMGP02050002	Glycerophospholipids [GP]	Glycerophosphoethanolamines [GP02]	Monoacylglycerophosphoethanolamines [GP0205]	HMDB0011503	53862-35-4	Organic compounds	Lipids and lipid-like molecules	Glycerophospholipids	Glycerophosphoethanolamines
pos_8846	(2-{[2-[hexadec-9-enamido]-3-hydroxyoctadec-4-en-1-yl phosphono]oxy}ethyl)trimethylazanium	396.749	263.777	310.822	243.549	305.827	331.092	615.482	471.129	367.434	464.183	304.145	449.864	1.47911	0.56473	0.04013	1.4891	up	--	--	--	--	--	--	--	--	--	--	--	--
pos_896	4-Hydroxy-3-methyl-2-(2-propynyl)-2-cyclopentene-1-one	38.0047	39.8834	43.1685	54.4864	49.3694	59.7581	67.3331	67.1433	59.5948	61.6214	44.9825	63.0901	1.40255	0.488052	0.00181382	1.87509	up	--	--	--	--	--	--	--	--	--	--	--	--
pos_8991	1,2-dihydroxyheptadec-16-en-4-yl acetate	83.2473	63.9837	148.629	88.611	106.434	12.5797	15.9158	17.5289	18.9296	7.39283	98.1809	14.4694	0.147375	-2.76244	0.00390078	1.98061	down	--	--	LMFA05000642	Fatty Acyls [FA]	Fatty alcohols [FA05]	-	HMDB0031045	59499-18-2	Organic compounds	Lipids and lipid-like molecules	Fatty Acyls	Fatty alcohols
pos_903	Indoleacetaldehyde	7900.06	7828.84	8336.82	8476.57	9165.46	11379.9	13454.4	13770.5	11407.4	12995.1	8341.55	12601.5	1.51069	0.595207	0.000349197	2.02299	up	C00637	Tryptophan metabolism(ko00380);;Metabolic pathways(ko01100)	--	--	--	--	HMDB0001190	2591-98-2	Organic compounds	Organoheterocyclic compounds	Indoles and derivatives	Indoles
pos_9033	(9E,11E)-Octadecadienoic acid	26332.6	23568	21077.3	10782	19551.4	29506.5	34518.9	31136.5	22138.7	29286.5	20262.3	29317.4	1.4469	0.532962	0.0276369	1.52457	up	--	--	--	--	--	--	HMDB0005047	1839-11-8	Organic compounds	Lipids and lipid-like molecules	Fatty Acyls	Lineolic acids and derivatives
pos_904	Methyl beta-D-galactoside	44.1006	52.7787	57.6628	67.0164	65.8313	69.3465	84.3071	86.0451	77.9401	75.022	57.478	78.5322	1.3663	0.450275	0.00469201	1.73131	up	C03619	ABC transporters(ko02010)	--	--	--	--	HMDB0246173	--	Organic compounds	Organic oxygen compounds	Organooxygen compounds	Carbohydrates and carbohydrate conjugates
pos_9082	L-2-Aminoadipate 6-semialdehyde	37.5211	38.1418	80.2451	61.2353	44.5945	12.0455	8.42786	18.0703	26.8471	4.6527	52.3476	14.0087	0.26761	-1.9018	0.00610426	1.84551	down	C04076	Lysine biosynthesis(ko00300);;Lysine degradation(ko00310);;Metabolic pathways(ko01100);;Biosynthesis of amino acids(ko01230)	--	--	--	--	HMDB0001263	6665-12-09	Organic compounds	Organic acids and derivatives	Carboxylic acids and derivatives	Amino acids, peptides, and analogues
pos_9085	D-Lysopine	12.5679	7.453	24.9976	14.539	13.2471	4.39403	3.39748	2.43157	4.99448	2.27382	14.5609	3.49828	0.240251	-2.05738	0.01713	1.78841	down	C04020	Lysine degradation(ko00310)	--	--	--	--	--	--	--	--	--	--
pos_9088	(5Z,8Z,11Z,14Z,17Z)-Icosapentaenoic acid	24897.9	19333.1	41231.5	30237.8	33703.2	11897.8	8087.2	12588.7	15460.7	13788.8	29880.7	12364.6	0.4138	-1.27299	0.00718863	1.86844	down	C06428	Biosynthesis of unsaturated fatty acids(ko01040)	LMFA01030759	Fatty Acyls [FA]	Fatty Acids and Conjugates [FA01]	Unsaturated fatty acids [FA0103]	HMDB0001999	10417-94-4	Organic compounds	Lipids and lipid-like molecules	Fatty Acyls	Fatty acids and conjugates
pos_9090	(+)-Camphor	66.22	52.6597	109.064	143.109	105.286	30.1069	20.9478	34.1539	39.7522	36.341	95.2677	32.2603	0.338628	-1.56223	0.0163227	1.75668	down	C00808	Inflammatory mediator regulation of TRP channels(ko04750)	LMPR0102120001	Prenol Lipids [PR]	Isoprenoids [PR01]	C10 isoprenoids (monoterpenes) [PR0102]	HMDB0059838	464-49-3	Organic compounds	Lipids and lipid-like molecules	Prenol lipids	Monoterpenoids
pos_9091	17-Hydroxymethylethisterone	564.951	407.379	939.768	588.543	672.225	257.213	207.867	290.987	312.956	271.349	634.573	268.075	0.422449	-1.24315	0.0125829	1.82669	down	--	--	--	--	--	--	HMDB0060710	--	Organic compounds	Lipids and lipid-like molecules	Steroids and steroid derivatives	Androstane steroids
pos_910	(R)-3-hydroxybutyrylcarnitine	7360.08	6450.16	8186.92	10505.7	9240.06	6702.62	3234.92	2671.12	4649.82	5477.95	8348.59	4547.29	0.544677	-0.876526	0.00583549	1.74012	down	--	--	--	--	--	--	HMDB0062735	--	Organic compounds	Lipids and lipid-like molecules	Fatty Acyls	Fatty acid esters
pos_9190	PA(18:1(11Z)/15:0)	16477.7	14151.9	14043.8	11374.8	13875.1	17684.7	17736.1	18032.5	14189.1	16913.5	13984.7	16911.2	1.20927	0.274132	0.0263676	1.54052	up	--	--	--	--	--	--	HMDB0114898	--	Organic compounds	Lipids and lipid-like molecules	Glycerophospholipids	Glycerophosphates
pos_9279	(-)-Amijiol	1159.13	705.332	1840.31	2206.86	1610.47	362.939	335.613	461.267	524.019	443.91	1504.42	425.55	0.282866	-1.82181	0.014113	1.79603	down	--	--	LMPR0104250001	Prenol Lipids [PR]	Isoprenoids [PR01]	C20 isoprenoids (diterpenes) [PR0104]	--	--	--	--	--	--
pos_9302	DEHYDROCHOLIC ACID	52.8873	41.4228	70.4473	32.5301	56.7249	10.3382	9.59933	17.7284	16.0974	13.2446	50.8025	13.4016	0.263798	-1.92249	0.0036071	1.94678	down	C13154	--	LMST04010106	Sterol Lipids [ST]	Bile acids and derivatives [ST04]	C24 bile acids, alcohols, and derivatives [ST0401]	--	--	--	--	--	--
pos_931	(E)-Casimiroedine	222.007	321.444	230.311	293.453	264.053	198.849	108.831	213.366	209.463	169.025	266.253	179.907	0.675698	-0.565549	0.0126314	1.59596	down	--	--	--	--	--	--	HMDB0030274	5853-02-01	Organic compounds	Organic oxygen compounds	Organooxygen compounds	Carbohydrates and carbohydrate conjugates
pos_9335	19(S)-HETE	366.977	298.425	568.947	524.271	449.55	211.056	167.777	208.544	247.404	221.885	441.634	211.333	0.478526	-1.06333	0.00810122	1.86574	down	C14749	Arachidonic acid metabolism(ko00590);;Metabolic pathways(ko01100)	--	--	--	--	HMDB0011136	79551-85-2	Organic compounds	Lipids and lipid-like molecules	Fatty Acyls	Eicosanoids
pos_9416	prostaglandin a1 ethyl ester	325.979	229.607	551.743	273.516	358.57	59.833	63.6211	81.4451	97.4808	86.9433	347.883	77.8647	0.223824	-2.15956	0.00784162	1.90242	down	--	--	--	--	--	--	--	--	--	--	--	--
pos_9435	4a-Hydroxytetrahydrobiopterin	20.5634	14.8526	9.81723e-08	1.56376	2.1454	105.651	51.9291	1.93625	48.674	64.2521	7.82504	54.4884	6.96333	2.79978	0.0463945	1.46789	up	C15522	Folate biosynthesis(ko00790);;Metabolic pathways(ko01100)	--	--	--	--	HMDB0002281	1379003-93-6	Organic compounds	Organoheterocyclic compounds	Pteridines and derivatives	Pterins and derivatives
pos_9454	Ser-Leu-Ile-Gly-Lys-Val	978.397	937.653	1046.41	1013.73	1072.98	921.31	786.77	751.528	813.461	894.111	1009.83	833.436	0.825321	-0.276973	0.00277776	1.84607	down	--	--	--	--	--	--	HMDB0250013	--	Organic compounds	Organic acids and derivatives	Carboxylic acids and derivatives	Amino acids, peptides, and analogues
pos_958	Lanthionine ketimine	792.995	839.848	955.522	1139.43	1022.11	703.251	614.682	698.554	850.53	788.836	949.981	731.171	0.769669	-0.377691	0.0222144	1.58384	down	--	--	--	--	--	--	HMDB0004823	83923-11-9	Organic compounds	Organic acids and derivatives	Carboxylic acids and derivatives	Amino acids, peptides, and analogues
pos_9625	PE(15:0/18:0)	5872.37	5675.2	5937.76	4602.2	6091.81	6361.99	7167.26	6840.07	6008.7	6857.67	5635.87	6647.14	1.17943	0.238096	0.0182674	1.56525	up	--	--	LMGP02011233	Glycerophospholipids [GP]	Glycerophosphoethanolamines [GP02]	Diacylglycerophosphoethanolamines [GP0201]	HMDB0008892	--	Organic compounds	Lipids and lipid-like molecules	Glycerophospholipids	Glycerophosphoethanolamines
pos_9638	trans-Dec-2-enoic acid	1639.44	1754.66	1655.83	1044.82	1494.78	2049.36	1933.78	1952.87	1648.18	1939.58	1517.91	1904.75	1.25486	0.327522	0.0339664	1.49207	up	--	--	--	--	--	--	HMDB0010726	--	Organic compounds	Lipids and lipid-like molecules	Fatty Acyls	Fatty acids and conjugates
pos_9710	C16 Sphingosine	53.2541	51.3916	58.5739	17.8177	40.8955	71.5334	73.0895	67.312	64.4694	67.4189	44.3866	68.7647	1.54922	0.631545	0.0263996	1.60842	up	--	--	LMSP01040008	Sphingolipids [SP]	Sphingoid bases [SP01]	Sphingoid base homologs and variants [SP0104]	HMDB0242181	--	Organic compounds	Organic nitrogen compounds	Organonitrogen compounds	Amines
pos_9740	Icosadienoic acid	28.959	18.2262	43.6263	27.2947	30.048	0.817586	0.603202	2.53326	3.26353	9.81723e-08	29.6308	1.44352	0.0487167	-4.35944	0.00202458	2.01901	down	C16525	Biosynthesis of unsaturated fatty acids(ko01040)	--	--	--	--	--	--	--	--	--	--
pos_9754	(S)-Hemiketal	34.8683	25.2168	31.5343	4.85578	13.7505	39.1498	41.827	40.2061	36.4456	38.9737	22.0451	39.3204	1.78363	0.834818	0.035937	1.58308	up	C18356	Metabolic pathways(ko01100)	--	--	--	--	--	--	--	--	--	--
pos_9972	Cholesterol-d7	4280.69	4094.09	4294.91	1492.89	2481.58	5230.43	4974.46	4839.14	4203.28	5224.6	3328.83	4894.38	1.4703	0.55611	0.0492757	1.46316	up	--	--	--	--	--	--	--	--	--	--	--	--
pos_9994	Cer(d17:1/PGE2)	234.208	199.066	199.346	112.661	167.515	257.987	242.115	240.8	234.016	250.259	182.559	245.035	1.34223	0.424627	0.0361374	1.58103	up	--	--	--	--	--	--	HMDB0289901	--	--	--	--	--
